# Supplementary material
Source: Royal Society of Chemistry journal article supplement (doi:10.1039/d6cc00996d)

# Supplementary Information

## Enantioselective Synthesis of Chiral Cyclic Hydroxylamine Ethers via NiH-Catalyzed Cyclization of Alkyne-Oxime Ethers

Lijin Zhou,<sup>a</sup> Jingjing Fang,<sup>a</sup> Xiaofeng Tong,<sup>a</sup> and Linjun Qi,<sup>\*ab</sup>

<sup>a</sup>School of Pharmaceutical and Chemical Engineering & Institute for Advanced Studies, Taizhou University, Taizhou 318000 Zhejiang, China.

<sup>b</sup>Yunnan Key Laboratory of Modern Separation Analysis and Substance Transformation, College of Chemistry and Chemical Engineering, Yunnan Normal University, Kunming 650500, China.

E-mail: [qilinjun@tzc.edu.cn](mailto:qilinjun@tzc.edu.cn)

### Table of Contents

|                                                         |            |
|---------------------------------------------------------|------------|
| <b>1. General Information .....</b>                     | <b>S2</b>  |
| <b>2. More Reaction Conditions and Scopes.....</b>      | <b>S3</b>  |
| <b>3. Preparation of Starting Materials.....</b>        | <b>S5</b>  |
| <b>4. General Procedure and Data for Products .....</b> | <b>S9</b>  |
| <b>5. Crystal Date .....</b>                            | <b>S30</b> |
| <b>6. References .....</b>                              | <b>S31</b> |
| <b>7. HPLC Chromatograms .....</b>                      | <b>S32</b> |
| <b>8. NMR Spectra .....</b>                             | <b>S58</b> |

## 1. General Information

All reactions were carried out in glassware under ambient atmosphere unless otherwise noted. Reactions were concentrated under reduced pressure using a rotary evaporator unless otherwise noted. Commercial reagents, including all of solvents, were used as received or purified using the methods indicated herein. All ligands were obtained from commercial sources.

**Chromatography:** Analytical thin-layer chromatography (TLC) was carried out with silica gel pre-coated glass plates. The TLC was visualized with a UV lamp (254 or 365 nm). Flash Column chromatography was carried out on silica gel (200-300 mesh) with technical grade solvents as the eluent.

**Nuclear magnetic resonance (NMR) spectroscopy:** NMR spectra were recorded using  $\text{CDCl}_3$  as the solvent and on the Bruker AVANCE spectrometer, operating at 400 MHz for  $^1\text{H}$  NMR and 100 MHz for  $^{13}\text{C}$  NMR. Chemical shifts ( $\delta$ ) were given in parts per million from tetramethylsilane ( $\delta$  0) and were measured relative to the signal of  $\text{CDCl}_3$  ( $^1\text{H}$  NMR:  $\delta$  7.26 ppm and  $^{13}\text{C}$  NMR: 77.0 ppm). Coupling constants ( $J$  values) were given in Hertz (Hz) and reported to the nearest 0.1 Hz.  $^1\text{H}$  NMR spectral data are tabulated in the order: multiplicity (s, singlet; d, doublet; t, triplet; q, quartet; sept, septet; m, multiplet; br broad), coupling constants, number of protons.

**High resolution mass spectrometry (HRMS):** HRMS were recorded on a liquid chromatography/quadrupole time-of-flight mass spectrometer (MicroTof-Q II mass spectrometer, Bruker Daltonics) using electrospray ionization-time of flight (ESI-TOF). The calculated values are based on the most abundant isotope.

**High performance liquid chromatography (HPLC):** HPLC analysis was performed on a SHIMADZU LC-20AT equipped with a variable wavelength UV-Vis detector SPD-20A and Daicel Chiralpak chiral column.

**Optical rotations:** Optical rotations were measured on an Autopol IV-T polarimeter. The optical rotation values ( $[\alpha]_D$ ) were reported at the indicated temperature in  $\text{deg. mL g}^{-1} \text{ dm}^{-1}$ .

**X-ray crystallography:** X-ray crystallography was performed on a BRUKERSMA

RTAPEXIICCD diffractometer.

## 2. More Reaction Conditions and Scopes

**Table S1: Screening of PHOX ligand**

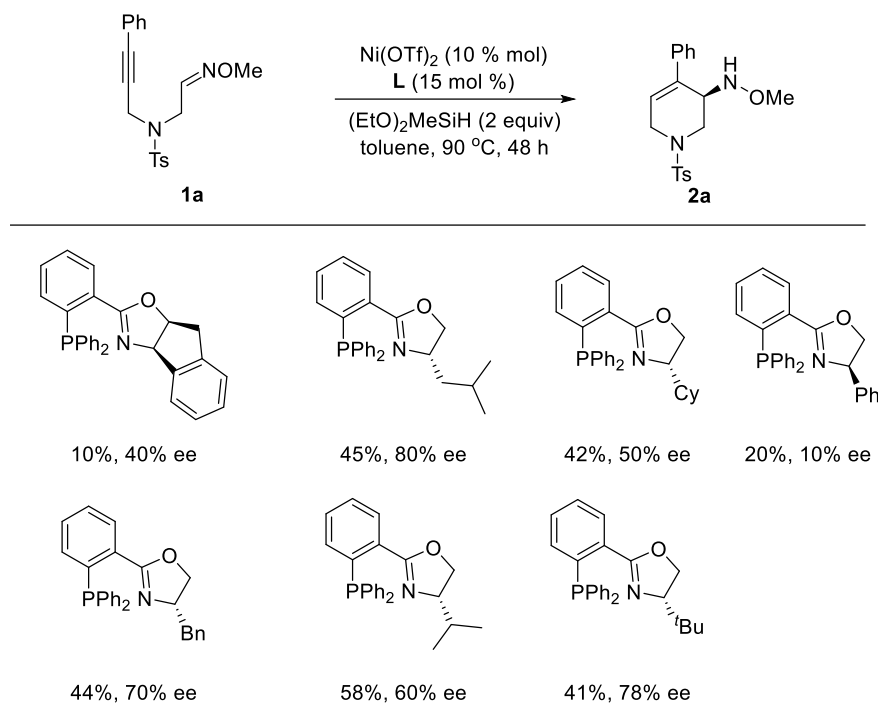

**Table S2: Screening of nickel precursor**

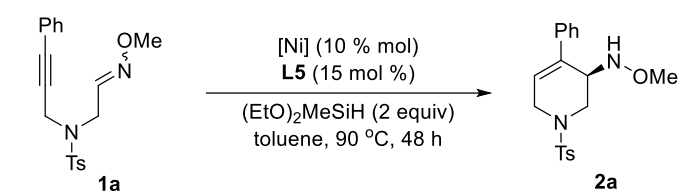

| entry | [Ni]                                                  | yield (%) | ee (%) |
|-------|-------------------------------------------------------|-----------|--------|
| 1     | $\text{Ni}(\text{OTf})_2$                             | 53        | 94     |
| 2     | $\text{Ni}(\text{TsO})_2 \cdot 6\text{H}_2\text{O}$   | 27        | 88     |
| 3     | $\text{Ni}(\text{BF}_4)_2 \cdot 6\text{H}_2\text{O}$  | 58        | 92     |
| 4     | $\text{Ni}(\text{ClO}_4)_2 \cdot 6\text{H}_2\text{O}$ | 62        | 93     |
| 5     | $\text{Ni}(\text{TFA})_2 \cdot 6\text{H}_2\text{O}$   | <10       | -      |
| 6     | $\text{Ni}(\text{OAc})_2 \cdot 6\text{H}_2\text{O}$   | <10       | -      |
| 7     | $\text{NiI}_2$                                        | 29        | 36     |

**Table S3: Screening of solvent**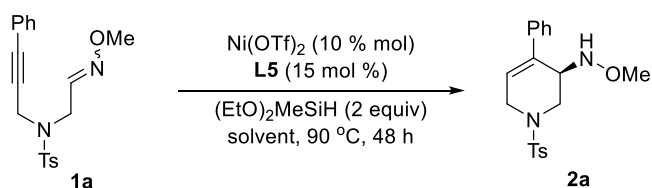

| entry    | solvent     | yield (%) | ee (%)    |
|----------|-------------|-----------|-----------|
| 1        | toluene     | 53        | 94        |
| <b>2</b> | <b>DME</b>  | <b>58</b> | <b>94</b> |
| 3        | THF         | 50        | 93        |
| 4        | 1,4-dioxane | 54        | 92        |
| 5        | DCE         | 16        | 94        |
| 6        | TFE         | -         | -         |
| 7        | HFIP        | -         | -         |

**Table S4: Screening of silane**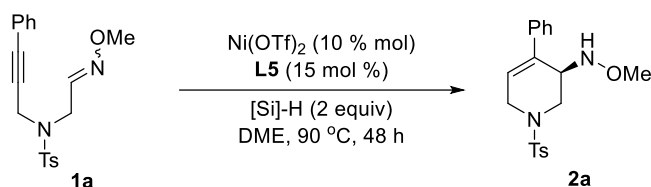

| entry    | [Si]-H                                         | yield (%) | ee (%)    |
|----------|------------------------------------------------|-----------|-----------|
| <b>1</b> | <b><math>(\text{EtO})_2\text{MeSiH}</math></b> | <b>58</b> | <b>94</b> |
| 2        | $(\text{EtO})_3\text{SiH}$                     | 51        | 94        |
| 3        | $(\text{MeO})_3\text{SiH}$                     | 45        | 94        |
| 4        | $\text{Et}_3\text{SiH}$                        | <1        | -         |
| 5        | PMMS                                           | 54        | 92        |

**Table S5: Screening of reaction temperature**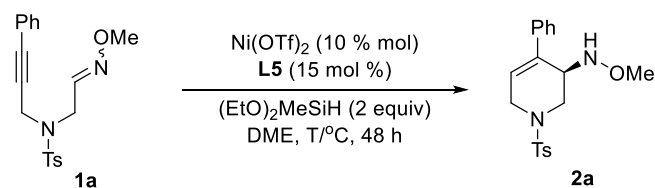

| entry    | T/°C      | yield (%) | ee (%)    |
|----------|-----------|-----------|-----------|
| 1        | 90        | 58        | 94        |
| 2        | 80        | 60        | 95        |
| <b>3</b> | <b>70</b> | <b>60</b> | <b>95</b> |
| 4        | 60        | 58        | 95        |

### Scheme S1: The reactions of substrates 1w–1aa

When substrates **1w–1aa** were employed under the optimal reaction conditions, the reaction failed to afford the desired products and only produced complex mixtures.

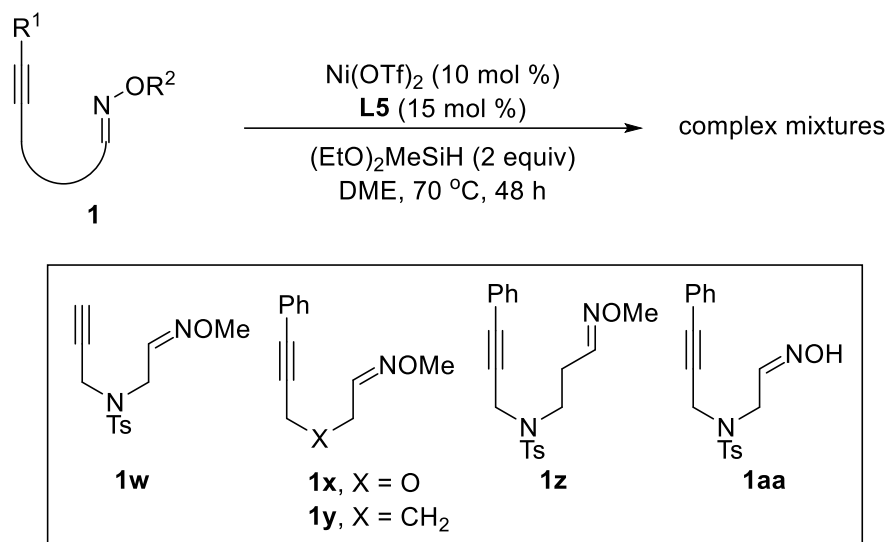

Scheme S1

### 3. Preparation of starting materials

All substrates (**1a–1aa**) were prepared according to the known procedures.<sup>1-2</sup> Among them, substrates **1a–1m**, **1o**, **1q**, **1r**, and **1x–1z** are known compounds.<sup>1</sup>

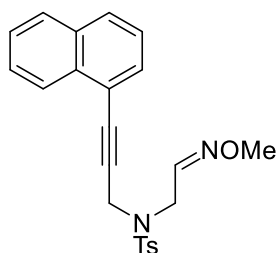

**1n**

Substrate **1n** was prepared according to the known procedure<sup>1-2</sup> (1.63 g, 80%) and purified by chromatography (petroleum ether/ethyl acetate = 10:1). White solid. *E/Z* = 1.5:1. <sup>1</sup>H NMR (400 MHz, CDCl<sub>3</sub>) δ 7.96 – 7.88 (m, 1H), 7.85 – 7.75 (m, 4H), 7.55 – 7.34 (m, 4.71H), 7.22 – 7.11 (m, 2H), 6.88 (t, *J* = 4.4 Hz, 0.39H), 4.51 (s, 0.79H), 4.93 (s, 1.18H), 4.27 (d, *J* = 4.4 Hz, 0.79H), 4.10 (d, *J* = 6.0 Hz, 1.20H), 3.87 (s,

1.17H), 3.85 (s, 1.81H), 2.18 (s, 1.18H), 2.16 (s, 1.75H);  $^{13}\text{C}$  NMR (100 MHz,  $\text{CDCl}_3$ )  $\delta$  147.2, 144.9, 144.0, 143.9, 135.6, 135.3, 132.9(8), 132.9(5), 130.7, 130.6, 129.7, 129.6, 129.0, 128.9, 128.2(0), 128.1(5), 127.7, 126.7(1), 126.6(7), 126.3(8), 126.3(5), 125.9, 125.8, 124.9(2), 124.9(0), 119.8, 119.6, 86.3, 86.1, 84.2, 62.2, 61.9, 45.9, 42.9, 39.3, 38.1, 21.3, 21.2; HRMS-ESI Calcd for  $[\text{C}_{23}\text{H}_{23}\text{N}_2\text{O}_3\text{S}]^+$  ( $\text{M} + \text{H}^+$ ) 407.1424, found 407.1426.

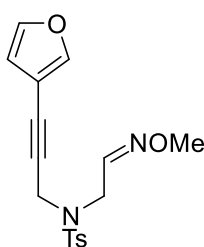

**1p**

Substrate **1p** was prepared according to the known procedure<sup>1-2</sup> (0.87 g, 50%) and purified by chromatography (petroleum ether/ethyl acetate = 8:1). Pale yellow oil. *E/Z* = 1.4:1.  $^1\text{H}$  NMR (400 MHz,  $\text{CDCl}_3$ )  $\delta$  7.75 (d,  $J = 8.0$  Hz, 2H), 7.38 – 7.23 (m, 4.73H), 6.78 (t,  $J = 4.0$  Hz, 0.39H), 6.22 – 6.14 (m, 1H), 4.28 (s, 0.83H), 4.26 (s, 1.19H), 4.12 (d,  $J = 4.0$  Hz, 1H), 3.96 (d,  $J = 5.6$  Hz, 1H), 3.86 (s, 1.23H), 3.82 (s, 1.77H), 2.38 (s, 1.22H), 2.37 (s, 1.76H);  $^{13}\text{C}$  NMR (100 MHz,  $\text{CDCl}_3$ )  $\delta$  147.4, 145.8(2), 145.8(0), 145.1, 143.8(4), 143.7(5), 142.7, 142.6, 135.7, 135.4, 129.6, 129.5, 127.7, 112.2(2), 112.1(6), 106.5, 106.4, 83.5, 83.3, 76.7, 62.1, 61.8, 45.8, 43.0, 39.2, 37.9, 21.4(4), 21.4(2); HRMS-ESI Calcd for  $[\text{C}_{17}\text{H}_{19}\text{N}_2\text{O}_4\text{S}]^+$  ( $\text{M} + \text{H}^+$ ) 347.1060, found 347.1060.

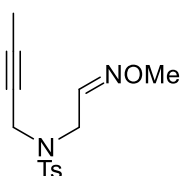

**1s**

Substrate **1s** was prepared according to the known procedure<sup>1-2</sup> (1.06 g, 72%) and purified by chromatography (petroleum ether/ethyl acetate = 12:1). White solid. *E/Z* =

1.5:1.  $^1\text{H}$  NMR (400 MHz,  $\text{CDCl}_3$ )  $\delta$  7.68 – 7.56 (m, 2H), 7.28 – 7.16 (m, 2.71H), 6.66 (t,  $J = 4.0$  Hz, 0.38H), 4.00 – 3.91 (m, 2.79H), 3.82 (d,  $J = 5.6$  Hz, 1.17H), 3.77 (s, 1.20H), 3.71 (s, 1.78H), 2.32 (s, 3H), 1.48 (s, 1.20H), 1.46 (s, 1.74H);  $^{13}\text{C}$  NMR (100 MHz,  $\text{CDCl}_3$ )  $\delta$  147.4, 144.9, 143.5, 143.4, 135.4, 135.1, 129.2, 129.1, 127.5(0), 127.4(5), 82.0, 81.9, 71.2, 71.1, 61.8, 61.4, 45.2, 42.7, 38.6, 37.2, 21.2, 3.0; HRMS-ESI Calcd for  $[\text{C}_{14}\text{H}_{19}\text{N}_2\text{O}_3\text{S}]^+$  ( $\text{M} + \text{H}^+$ ) 295.1111, found 295.1112.

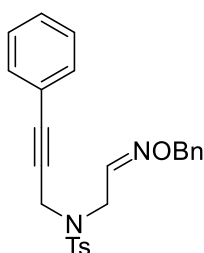

**1t**

Substrate **1t** was prepared according to the known procedure<sup>1-2</sup> (1.54 g, 71%) and purified by chromatography (petroleum ether/ethyl acetate = 10:1). White solid. *E/Z* = 1.3:1.  $^1\text{H}$  NMR (400 MHz,  $\text{CDCl}_3$ )  $\delta$  7.79 (d,  $J = 8.4$  Hz, 2H), 7.46 (t,  $J = 6.0$  Hz, 0.59H), 7.38 – 7.23 (m, 10H), 7.17 – 7.10 (m, 2H), 6.89 (t,  $J = 4.4$  Hz, 0.41H), 5.14 (s, 0.84H), 5.10 (s, 1.16H), 4.35 (s, 0.84H), 4.30 (s, 1.13H), 4.27 (d,  $J = 4.4$  Hz, 0.86H), 4.05 (d,  $J = 6.0$  Hz, 1.16H), 2.37 (s, 1.30H), 2.36 (s, 1.67H);  $^{13}\text{C}$  NMR (100 MHz,  $\text{CDCl}_3$ )  $\delta$  147.9, 145.6, 143.9, 143.8, 137.3, 137.1, 135.6, 135.4, 131.5(0), 131.4(7), 129.7, 129.6, 128.5, 128.4(1), 128.3(6), 128.2, 128.1(1), 128.0(6), 127.9(9), 127.9(5), 127.9, 127.7, 122.0, 121.9, 86.0, 85.9, 81.6, 81.3, 76.4, 76.1, 45.9, 43.0, 39.1, 37.8, 21.4; HRMS-ESI Calcd for  $[\text{C}_{25}\text{H}_{25}\text{N}_2\text{O}_3\text{S}]^+$  ( $\text{M} + \text{H}^+$ ) 433.1580, found 433.1578.

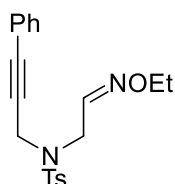

**1u**

Substrate **1u** was prepared according to the known procedure<sup>1-2</sup> (1.52 g, 82%) and purified by chromatography (petroleum ether/ethyl acetate = 10:1). Colorless oil. *E/Z*

= 1.5:1.  $^1\text{H}$  NMR (400 MHz,  $\text{CDCl}_3$ )  $\delta$  7.80 (d,  $J = 8.0$  Hz, 2H), 7.38 (t,  $J = 6.0$  Hz, 0.6H), 7.33 – 7.22 (m, 5H), 7.17 – 7.09 (m, 2H), 6.83 (t,  $J = 4.0$  Hz, 0.41H), 4.36 (s, 0.82H), 4.34 (s, 1.21H), 4.21 (d,  $J = 4.0$  Hz, 0.82H), 4.17 – 1.05 (m, 2H), 4.03 (d,  $J = 6.0$  Hz, 1.19H), 2.38 (s, 1.22H), 2.36 (s, 1.82H), 1.25 (t,  $J = 6.8$  Hz, 3H);  $^{13}\text{C}$  NMR (100 MHz,  $\text{CDCl}_3$ )  $\delta$  147.0, 144.7, 143.9, 143.8, 135.6, 135.4, 131.5(2), 131.4(7), 129.7, 129.6, 128.5, 128.4, 128.1(2), 128.0(6), 127.8, 122.1, 121.9, 85.9, 81.5, 81.4, 70.0, 69.6, 46.0, 43.0, 39.1, 37.8, 21.4(4), 21.4(1), 14.5, 14.4; HRMS-ESI Calcd for  $[\text{C}_{20}\text{H}_{23}\text{N}_2\text{O}_3]^+$  ( $\text{M} + \text{H}^+$ ) 371.1424, found 371.1427.

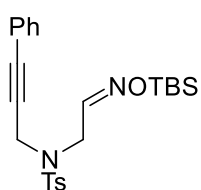

**1v**

Substrate **1v** was prepared according to the known procedure<sup>1-2</sup> (1.32 g, 58%) and purified by chromatography (petroleum ether/ethyl acetate = 15:1). White solid. *E/Z* = 1.5:1.  $^1\text{H}$  NMR (400 MHz,  $\text{CDCl}_3$ )  $\delta$  7.63 (d,  $J = 8.4$  Hz, 2H), 7.36 (t,  $J = 6.0$  Hz, 0.57H), 7.16 – 7.06 (m, 5H), 7.00 – 6.93 (m, 2H), 6.88 (t,  $J = 4.0$  Hz, 1H), 4.19 (s, 0.78H), 4.16 (s, 1.14H), 4.11 (d,  $J = 4.0$  Hz, 0.81H), 3.90 (d,  $J = 5.6$  Hz, 1.19H), 2.20 (s, 1.26H), 2.19 (s, 1.67H), 0.77 (s, 5.39H), 0.75 (s, 3.56H), 0.007 (s, 2.54H), 0.000 (s, 3.44H);  $^{13}\text{C}$  NMR (100 MHz,  $\text{CDCl}_3$ )  $\delta$  151.8, 149.7, 143.9, 143.8, 135.6, 135.5, 131.5(0), 131.4(6), 129.7, 129.6, 128.5, 128.4, 128.1, 128.0, 127.7(4), 127.6(8), 122.1, 85.9, 81.5, 81.4, 45.9, 42.8, 39.1, 37.7, 25.9(4), 25.8(6), 21.3(9), 21.3(7), 18.1, 18.0, -5.4, -5.4; HRMS-ESI Calcd for  $[\text{C}_{24}\text{H}_{33}\text{N}_2\text{O}_3\text{SSi}]^+$  ( $\text{M} + \text{H}^+$ ) 457.1976, found 457.1974.

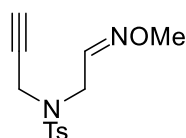

**1w**

Substrate **1w** was prepared according to the known procedure<sup>1-2</sup> (0.84 g, 60%) and purified by chromatography (petroleum ether/ethyl acetate = 10:1). Pale yellow oil. *E/Z* = 1.5:1. <sup>1</sup>H NMR (400 MHz, CDCl<sub>3</sub>) δ 7.77 – 7.68 (m, 2H), 7.35 – 7.26 (m, 2.68H), 6.76 (t, *J* = 4.0 Hz, 0.39H), 4.15 – 4.08 (m, 2.89H), 3.95 (d, *J* = 6.0 Hz, 1.21H), 3.88 (s, 1.21H), 3.83 (s, 1.77H), 2.44 (s, 3H), 2.12 (t, *J* = 2.0 Hz, 0.38H), 2.09 (t, *J* = 2.0 Hz, 0.54H); <sup>13</sup>C NMR (100 MHz, CDCl<sub>3</sub>) δ 147.2, 144.8, 144.0, 143.9, 135.6, 135.2, 129.7, 129.6, 127.6(4), 127.6(3), 76.3, 76.2, 74.3, 74.1, 62.1, 61.8, 45.5, 42.8, 38.3, 36.8, 21.5; HRMS-ESI Calcd for [C<sub>13</sub>H<sub>17</sub>N<sub>2</sub>O<sub>3</sub>S]<sup>+</sup> (M + H<sup>+</sup>) 281.0954, found 281.0954.

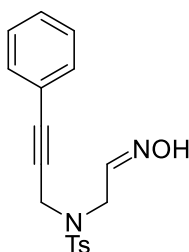

**1aa**

Substrate **1aa** was prepared according to the known procedure<sup>1-2</sup> (1.42 g, 83%) and purified by chromatography (petroleum ether/ethyl acetate = 8:1). White solid. *E/Z* = 1.3:1. <sup>1</sup>H NMR (400 MHz, CDCl<sub>3</sub>) δ 8.79 (s, 0.40H), 8.40 (s, 0.56H), 7.71 – 7.65 (m, 2H), 7.34 (t, *J* = 6.0 Hz, 1H), 7.21 – 7.10 (m, 5H), 7.07 – 6.97 (m, 2H), 6.83 (s, 0.41H), 4.25 (s, 0.85H), 4.22 (s, 1.12H), 4.14 (d, *J* = 4.0 Hz, 0.84H), 3.94 (d, *J* = 6.0 Hz, 1.12H), 2.26 (s, 1.30H), 2.24 (s, 1.69H); <sup>13</sup>C NMR (100 MHz, CDCl<sub>3</sub>) δ 148.7, 146.6, 144.0, 143.9, 135.5, 135.2, 131.5(0), 131.4(6), 129.7, 129.6, 128.5(2), 128.4(5), 128.1, 128.0, 127.7(3), 127.7(0), 121.9, 121.8, 86.1, 86.0, 81.3, 81.2, 45.7, 42.6, 39.3, 37.8, 21.3(8), 21.3(6); HRMS-ESI Calcd for [C<sub>18</sub>H<sub>19</sub>N<sub>2</sub>O<sub>3</sub>S]<sup>+</sup> (M + H<sup>+</sup>) 343.1111, found 343.1112.

## 4. General Procedure and Data for Products

### 4.1 General procedure for the synthesis of chiral hydroxylamine ethers **2**:

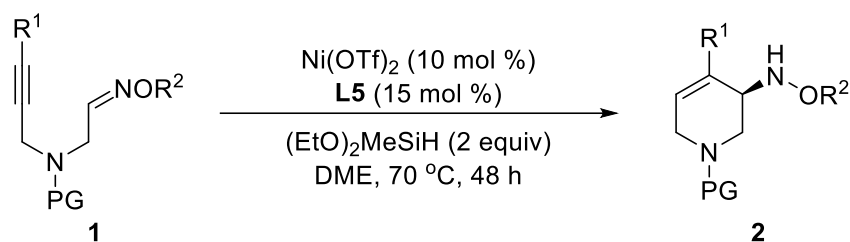

Ni(OTf)<sub>2</sub> (0.02 mmol, 7.1 mg), **L5** (0.03 mmol, 10.0 mg) and DME (4 mL) were introduced into an oven-dried Schlenk tube under nitrogen atmosphere. The resultant solution was stirred at 25 °C under the N<sub>2</sub> atmosphere for 0.5 h. Then, alkyne-oxime ethers **1** (0.2 mmol) and (EtO)<sub>2</sub>MeSiH (0.4 mmol, 64 uL) were introduced into the system. The resulting mixture was stirred at 70 °C (oil bath) for 48 h. Upon completion, the mixture was concentrated and the residue was purified by chromatography on silica gel (eluent: hexanes/ethyl acetate) to afford the desired products **2**.

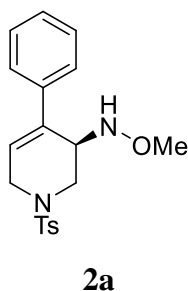

Compound **2a** was obtained in 62% yield (44.5 mg) according to the general procedure and purified by chromatography (petroleum ether/ethyl acetate = 10:1). Pale yellow oil.  $[\alpha]_D^{20} = -49.4^\circ$  ( $c = 2.0$ , CH<sub>2</sub>Cl<sub>2</sub>). 95% ee (determined by HPLC: Chiralpak OZH Column, 20/80 *i*-PrOH/hexane, 1.0 mL/min, 254 nm; TR = 16.927 min (major), 23.226 min (minor)). <sup>1</sup>H NMR (400 MHz, CDCl<sub>3</sub>)  $\delta$  7.57 (d,  $J = 8.0$  Hz, 2H), 7.29 (d,  $J = 7.2$  Hz, 2H), 7.20 – 7.09 (m, 5H), 5.91 (dd,  $J = 4.4, 2.4$  Hz, 1H), 5.55 (s, 1H), 4.09 (dd,  $J = 11.6, 1.2$  Hz, 1H), 3.98 (dd,  $J = 17.6, 4.4$  Hz, 1H), 3.89 (s, 1H), 3.43 (s, 3H), 3.13 (d,  $J = 17.2$  Hz, 1H), 2.36 (dd,  $J = 11.6, 2.4$  Hz, 1H), 2.26 (s, 3H); <sup>13</sup>C NMR (100 MHz, CDCl<sub>3</sub>)  $\delta$  143.8, 138.4, 133.7, 132.9, 129.7, 128.6, 127.9, 127.7, 125.6, 124.0, 62.0, 56.4, 45.4, 44.8, 21.5; HRMS-ESI Calcd for [C<sub>19</sub>H<sub>23</sub>N<sub>2</sub>O<sub>3</sub>S]<sup>+</sup> (M + H<sup>+</sup>) 359.1424, found 359.1423.

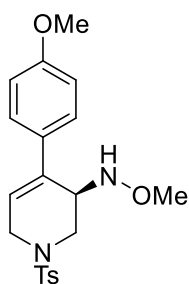

**2b**

Compound **2b** was obtained in 53% yield (41.2 mg) according to the general procedure and purified by chromatography (petroleum ether/ethyl acetate = 5:1). Colorless oil.  $[\alpha]_D^{20} = -59.3^\circ$  ( $c = 1.6$ ,  $\text{CH}_2\text{Cl}_2$ ). 94% ee (determined by HPLC: Chiralpak OZH Column, 30/70 *i*-PrOH/hexane, 1.0 mL/min, 254 nm; TR = 19.224 min (major), 25.247 min (minor)).  $^1\text{H}$  NMR (400 MHz,  $\text{CDCl}_3$ )  $\delta$  7.74 (d,  $J = 8.0$  Hz, 2H), 7.40 (d,  $J = 8.8$  Hz, 2H), 7.35 (d,  $J = 8.0$  Hz, 2H), 6.86 (d,  $J = 8.8$  Hz, 2H), 5.99 (dd,  $J = 4.4, 2.4$  Hz, 1H), 5.72 (s, 1H), 4.26 (dd,  $J = 11.6, 1.2$  Hz, 1H), 4.14 (dd,  $J = 17.2, 4.4$  Hz, 1H), 4.03 (s, 1H), 3.80 (s, 3H), 3.61 (s, 3H), 3.28 (d,  $J = 17.2$  Hz, 1H), 2.51 (dd,  $J = 11.6, 2.4$  Hz, 1H), 2.44 (s, 3H);  $^{13}\text{C}$  NMR (100 MHz,  $\text{CDCl}_3$ )  $\delta$  159.4, 143.7, 133.1, 133.0, 130.9, 129.7, 127.8, 126.7, 122.3, 114.0, 62.1, 56.5, 55.3, 45.4, 44.8, 21.5; HRMS-ESI Calcd for  $[\text{C}_{20}\text{H}_{25}\text{N}_2\text{O}_4\text{S}]^+$  ( $\text{M} + \text{H}^+$ ) 389.1530, found 389.1532.

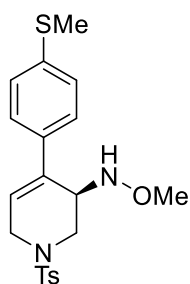

**2c**

Compound **2c** was obtained in 69% yield (55.8 mg) according to the general procedure and purified by chromatography (petroleum ether/ethyl acetate = 5:1). Pale yellow oil.  $[\alpha]_D^{20} = -45.2^\circ$  ( $c = 2.3$ ,  $\text{CH}_2\text{Cl}_2$ ). 95% ee (determined by HPLC: Chiralpak OZH Column, 30/70 *i*-PrOH/hexane, 1.0 mL/min, 254 nm; TR = 22.970

min (major), 28.836 min (minor)).  $^1\text{H}$  NMR (400 MHz,  $\text{CDCl}_3$ )  $\delta$  7.73 (d,  $J = 8.0$  Hz, 2H), 7.39 (d,  $J = 8.4$  Hz, 2H), 7.34 (d,  $J = 8.0$  Hz, 2H), 7.20 (d,  $J = 8.4$  Hz, 2H), 6.06 (dd,  $J = 4.4, 2.4$  Hz, 1H), 5.68 (s, 1H), 4.26 (dd,  $J = 11.6, 1.2$  Hz, 1H), 4.14 (dd,  $J = 17.6, 4.4$  Hz, 1H), 4.02 (s, 1H), 3.59 (s, 3H), 3.29 (d,  $J = 17.2$  Hz, 1H), 2.50 (dd,  $J = 11.6, 2.4$  Hz, 1H), 2.46 (s, 3H), 2.43 (s, 3H);  $^{13}\text{C}$  NMR (100 MHz,  $\text{CDCl}_3$ )  $\delta$  143.8, 138.3, 135.1, 133.1, 132.9, 129.7, 127.7, 126.5, 125.9, 123.4, 62.0, 56.3, 45.4, 44.7, 21.5, 15.6; HRMS-ESI Calcd for  $[\text{C}_{20}\text{H}_{25}\text{N}_2\text{O}_3\text{S}_2]^+$  ( $\text{M} + \text{H}^+$ ) 405.1301, found 405.1301.

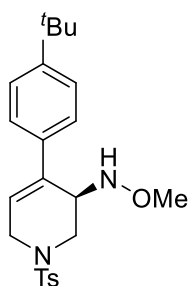

**2d**

Compound **2d** was obtained in 62% yield (51.4 mg) according to the general procedure and purified by chromatography (petroleum ether/ethyl acetate = 10:1). Colorless oil.  $[\alpha]_{\text{D}}^{20} = -51.9^\circ$  ( $c = 2.0$ ,  $\text{CH}_2\text{Cl}_2$ ). 92% ee (determined by HPLC: Chiralpak ASH Column, 5/95 *i*-PrOH/hexane, 1.0 mL/min, 254 nm; TR = 23.222 min (major), 26.083 min (minor)).  $^1\text{H}$  NMR (400 MHz,  $\text{CDCl}_3$ )  $\delta$  7.74 (d,  $J = 8.0$  Hz, 2H), 7.42 (d,  $J = 8.0$  Hz, 2H), 7.38 – 7.31 (m, 4H), 6.13 – 6.02 (m, 1H), 5.73 (s, 1H), 4.28 (d,  $J = 11.6$  Hz, 1H), 4.16 (dd,  $J = 17.2, 4.4$  Hz, 1H), 4.07 (s, 1H), 3.62 (s, 3H), 3.30 (d,  $J = 17.2$  Hz, 1H), 2.51 (dd,  $J = 11.6, 1.6$  Hz, 1H), 2.44 (s, 3H), 1.31 (s, 9H);  $^{13}\text{C}$  NMR (100 MHz,  $\text{CDCl}_3$ )  $\delta$  150.9, 143.7, 135.3, 133.3, 133.0, 129.7, 127.8, 125.5, 125.2, 123.2, 62.0, 56.4, 45.5, 44.8, 34.5, 31.2, 21.5; HRMS-ESI Calcd for  $[\text{C}_{23}\text{H}_{31}\text{N}_2\text{O}_3\text{S}]^+$  ( $\text{M} + \text{H}^+$ ) 415.2050, found 415.2049.

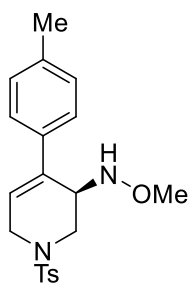

**2e**

Compound **2e** was obtained in 60% yield (44.7 mg) according to the general procedure and purified by chromatography (petroleum ether/ethyl acetate = 10:1). Pale yellow solid.  $[\alpha]_D^{20} = -57.8^\circ$  ( $c = 1.8$ ,  $\text{CH}_2\text{Cl}_2$ ). 95% ee (determined by HPLC: Chiralpak OZH Column, 30/70 *i*-PrOH/hexane, 1.0 mL/min, 254 nm; TR = 12.151 min (major), 14.457 min (minor)).  $^1\text{H}$  NMR (400 MHz,  $\text{CDCl}_3$ )  $\delta$  7.74 (d,  $J = 8.0$  Hz, 2H), 7.40 – 7.30 (m, 4H), 7.14 (d,  $J = 8.0$  Hz, 2H), 6.05 (dd,  $J = 4.0, 2.4$  Hz, 1H), 5.72 (s, 1H), 4.26 (dd,  $J = 11.6, 1.2$  Hz, 1H), 4.14 (dd,  $J = 17.2, 4.0$  Hz, 1H), 4.05 (s, 1H), 3.60 (s, 3H), 3.30 (d,  $J = 17.2$  Hz, 1H), 2.53 (dd,  $J = 11.6, 2.4$  Hz, 1H), 2.44 (s, 3H), 2.33 (s, 3H);  $^{13}\text{C}$  NMR (100 MHz,  $\text{CDCl}_3$ )  $\delta$  143.7, 137.7, 135.5, 133.5, 132.9, 129.7, 129.3, 127.8, 125.4, 123.2, 62.0, 56.4, 45.4, 44.9, 21.5, 21.0; HRMS-ESI Calcd for  $[\text{C}_{20}\text{H}_{25}\text{N}_2\text{O}_3\text{S}]^+$  ( $\text{M} + \text{H}^+$ ) 373.1580, found 373.1578.

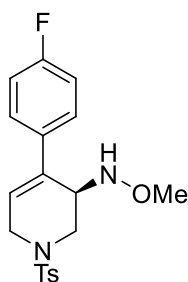

**2f**

Compound **2f** was obtained in 61% yield (45.9 mg) according to the general procedure and purified by chromatography (petroleum ether/ethyl acetate = 10:1). Pale yellow oil.  $[\alpha]_D^{20} = -31.9^\circ$  ( $c = 1.9$ ,  $\text{CH}_2\text{Cl}_2$ ). 89% ee (determined by HPLC: Chiralpak OZH Column, 20/80 *i*-PrOH/hexane, 1.0 mL/min, 254 nm; TR = 18.339 min (major), 25.085 min (minor)).  $^1\text{H}$  NMR (400 MHz,  $\text{CDCl}_3$ )  $\delta$  7.73 (d,  $J = 8.0$  Hz, 2H), 7.45 (dd,  $J = 8.8, 5.2$  Hz, 2H), 7.34 (d,  $J = 8.0$  Hz, 2H), 7.00 (t,  $J = 8.8$  Hz, 2H),

6.02 (dd,  $J = 4.4, 2.4$  Hz, 1H), 5.72 (s, 1H), 4.27 (dd,  $J = 11.6, 1.6$  Hz, 1H), 4.14 (dd,  $J = 17.2, 4.4$  Hz, 1H), 3.99 (s, 1H), 3.58 (s, 3H), 3.28 (d,  $J = 17.2$  Hz, 1H), 2.50 (dd,  $J = 12.0, 2.4$  Hz, 1H), 2.43 (s, 3H);  $^{13}\text{C}$  NMR (100 MHz,  $\text{CDCl}_3$ ) 162.4 (d,  $J = 246.0$  Hz), 143.8, 134.7 (d,  $J = 4.0$  Hz), 132.9, 132.8, 129.7, 127.7, 127.1 (d,  $J = 8.0$  Hz), 123.9, 115.4 (d,  $J = 21.0$  Hz), 61.9, 56.6, 45.4, 44.7, 21.5; HRMS-ESI Calcd for  $[\text{C}_{19}\text{H}_{22}\text{FN}_2\text{O}_3\text{S}]^+$  ( $\text{M} + \text{H}^+$ ) 377.1330, found 377.1331.

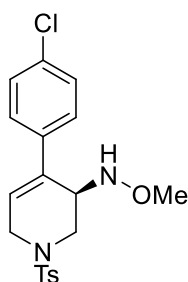

**2g**

Compound **2g** was obtained in 55% yield (43.2 mg) according to the general procedure and purified by chromatography (petroleum ether/ethyl acetate = 10:1). White solid.  $[\alpha]_{\text{D}}^{20} = -46.9^\circ$  ( $c = 1.7, \text{CH}_2\text{Cl}_2$ ). 88% ee (determined by HPLC: Chiralpak OZH Column, 20/80 *i*-PrOH/hexane, 1.0 mL/min, 254 nm; TR = 22.088 min (major), 27.826 min (minor)).  $^1\text{H}$  NMR (400 MHz,  $\text{CDCl}_3$ )  $\delta$  7.73 (d,  $J = 8.0$  Hz, 2H), 7.41 (d,  $J = 8.8$  Hz, 2H), 7.35 (d,  $J = 8.0$  Hz, 2H), 7.29 (d,  $J = 8.8$  Hz, 2H), 6.07 (dd,  $J = 4.4, 2.4$  Hz, 1H), 5.71 (s, 1H), 4.27 (dd,  $J = 12.0, 1.2$  Hz, 1H), 4.15 (dd,  $J = 17.2, 4.4$  Hz, 1H), 3.99 (s, 1H), 3.58 (s, 3H), 3.28 (d,  $J = 17.6$  Hz, 1H), 2.50 (dd,  $J = 12.0, 2.4$  Hz, 1H), 2.43 (s, 3H);  $^{13}\text{C}$  NMR (100 MHz,  $\text{CDCl}_3$ )  $\delta$  143.9, 137.1, 133.6, 132.9, 132.8, 129.7, 128.7, 127.7, 126.9, 124.5, 61.9, 56.4, 45.4, 44.7, 21.5; HRMS-ESI Calcd for  $[\text{C}_{19}\text{H}_{22}\text{ClN}_2\text{O}_3\text{S}]^+$  ( $\text{M} + \text{H}^+$ ) 393.1034, found 393.1034.

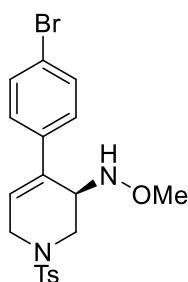

## 2h

Compound **2h** was obtained in 66% yield (57.7 mg) according to the general procedure and purified by chromatography (petroleum ether/ethyl acetate = 10:1). White solid.  $[\alpha]_D^{20} = -49.5^\circ$  ( $c = 2.4$ ,  $\text{CH}_2\text{Cl}_2$ ). 92% ee (determined by HPLC: Chiralpak OZH Column, 20/80 *i*-PrOH/hexane, 1.0 mL/min, 254 nm; TR = 24.526 min (major), 29.867 min (minor)).  $^1\text{H}$  NMR (400 MHz,  $\text{CDCl}_3$ )  $\delta$  7.72 (d,  $J = 8.0$  Hz, 2H), 7.44 (d,  $J = 8.4$  Hz, 2H), 7.38 – 7.30 (m, 4H), 6.08 (dd,  $J = 4.4, 2.4$  Hz, 1H), 5.70 (s, 1H), 4.27 (dd,  $J = 11.6, 1.2$  Hz, 1H), 4.14 (dd,  $J = 17.6, 4.4$  Hz, 1H), 3.98 (s, 1H), 3.58 (s, 3H), 3.27 (d,  $J = 17.6$  Hz, 1H), 2.49 (dd,  $J = 11.6, 2.4$  Hz, 1H), 2.43 (s, 3H);  $^{13}\text{C}$  NMR (100 MHz,  $\text{CDCl}_3$ )  $\delta$  143.9, 137.5, 132.9, 132.8, 131.6, 129.7, 127.7, 127.3, 124.6, 121.8, 61.9, 56.3, 45.4, 44.6, 21.5; HRMS-ESI Calcd for  $[\text{C}_{19}\text{H}_{22}\text{BrN}_2\text{O}_3\text{S}]^+$  ( $\text{M} + \text{H}^+$ ) 437.0529, found 437.0530.

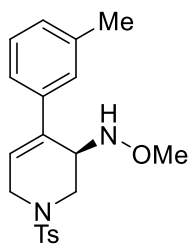

## 2i

Compound **2i** was obtained in 61% yield (45.4 mg) according to the general procedure and purified by chromatography (petroleum ether/ethyl acetate = 10:1). Colorless oil.  $[\alpha]_D^{20} = -56.7^\circ$  ( $c = 1.9$ ,  $\text{CH}_2\text{Cl}_2$ ). 94% ee (determined by HPLC: Chiralpak OZH Column, 25/75 *i*-PrOH/hexane, 1.0 mL/min, 254 nm; TR = 12.105 min (major), 16.925 min (minor)).  $^1\text{H}$  NMR (400 MHz,  $\text{CDCl}_3$ )  $\delta$  7.74 (d,  $J = 8.4$  Hz, 2H), 7.35 (d,  $J = 8.0$  Hz, 2H), 7.27 – 7.19 (m, 3H), 7.09 (d,  $J = 6.8$  Hz, 1H), 6.06 (dd,  $J = 4.0, 2.4$  Hz, 1H), 5.72 (s, 1H), 4.25 (dd,  $J = 11.6, 2.4$  Hz, 1H), 4.14 (dd,  $J = 17.2, 4.0$  Hz, 1H), 4.06 (s, 1H), 3.60 (s, 3H), 3.30 (d,  $J = 17.2$  Hz, 1H), 2.53 (dd,  $J = 11.6, 2.4$  Hz, 1H), 2.43 (s, 3H), 2.33 (s, 3H);  $^{13}\text{C}$  NMR (100 MHz,  $\text{CDCl}_3$ )  $\delta$  143.7, 138.4, 138.2, 133.8, 132.9, 129.7, 128.6, 128.5, 127.7, 126.4, 123.8, 122.6, 62.0, 56.4, 45.4, 44.8, 21.4(7), 21.4(5); HRMS-ESI Calcd for  $[\text{C}_{20}\text{H}_{25}\text{N}_2\text{O}_3\text{S}]^+$  ( $\text{M} + \text{H}^+$ ) 373.1580, found 373.1582.

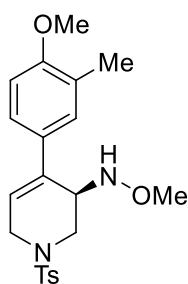

**2j**

Compound **2j** was obtained in 60% yield (48.3 mg) according to the general procedure and purified by chromatography (petroleum ether/ethyl acetate = 5:1). Pale yellow oil.  $[\alpha]_D^{20} = -52.3^\circ$  ( $c = 2.0$ ,  $\text{CH}_2\text{Cl}_2$ ). 88% ee (determined by HPLC: Chiralpak OZH Column, 35/65 *i*-PrOH/hexane, 1.0 mL/min, 254 nm; TR = 12.677 min (major), 15.840 min (minor)).  $^1\text{H}$  NMR (400 MHz,  $\text{CDCl}_3$ )  $\delta$  7.58 (d,  $J = 8.0$  Hz, 2H), 7.18 (d,  $J = 8.0$  Hz, 2H), 7.14 – 7.04 (m, 2H), 6.62 (d,  $J = 8.4$  Hz, 1H), 5.82 (dd,  $J = 4.0, 2.4$  Hz, 1H), 5.56 (s, 1H), 4.09 (d,  $J = 12.0$  Hz, 1H), 3.97 (dd,  $J = 17.2, 4.4$  Hz, 1H), 3.88 (s, 1H), 3.65 (s, 3H), 3.45 (s, 3H), 3.12 (d,  $J = 17.2$  Hz, 1H), 2.35 (dd,  $J = 12.0, 2.0$  Hz, 1H), 2.27 (s, 3H), 2.03 (s, 3H);  $^{13}\text{C}$  NMR (100 MHz,  $\text{CDCl}_3$ )  $\delta$  157.6, 143.7, 133.1, 132.9, 130.3, 129.7, 127.9, 127.8, 126.7, 124.0, 122.1, 109.8, 62.1, 56.5, 55.3, 45.4, 44.9, 21.5, 16.3; HRMS-ESI Calcd for  $[\text{C}_{21}\text{H}_{27}\text{N}_2\text{O}_4\text{S}]^+$  ( $\text{M} + \text{H}^+$ ) 403.1686, found 403.1685.

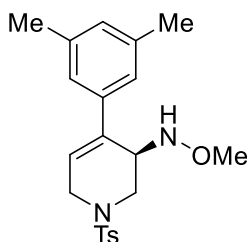

**2k**

Compound **2k** was obtained in 62% yield (47.9 mg) according to the general procedure and purified by chromatography (petroleum ether/ethyl acetate = 10:1). Pale yellow oil.  $[\alpha]_D^{20} = -43.7^\circ$  ( $c = 2.0$ ,  $\text{CH}_2\text{Cl}_2$ ). 93% ee (determined by HPLC: Chiralpak OZH Column, 20/80 *i*-PrOH/hexane, 1.0 mL/min, 254 nm; TR = 12.380 min (major), 17.236 min (minor)).  $^1\text{H}$  NMR (400 MHz,  $\text{CDCl}_3$ )  $\delta$  7.75 (d,  $J = 8.0$  Hz,

2H), 7.35 (d,  $J = 8.0$  Hz, 2H), 7.06 (s, 2H), 6.93 (s, 1H), 6.05 (dd,  $J = 4.4, 2.4$  Hz, 1H), 5.70 (s, 1H), 4.24 (dd,  $J = 11.6, 2.4$  Hz, 1H), 4.13 (dd,  $J = 17.2, 4.4$  Hz, 1H), 4.06 (s, 1H), 3.61 (s, 3H), 3.30 (d,  $J = 17.2$  Hz, 1H), 2.55 (dd,  $J = 11.6, 2.4$  Hz, 1H), 2.44 (s, 3H), 2.30 (s, 6H);  $^{13}\text{C}$  NMR (100 MHz,  $\text{CDCl}_3$ )  $\delta$  143.7, 138.3, 138.1, 133.9, 133.0, 129.7, 129.6, 127.8, 123.7, 123.5, 62.1, 56.5, 45.4, 44.9, 21.5, 21.3; HRMS-ESI Calcd for  $[\text{C}_{21}\text{H}_{27}\text{N}_2\text{O}_3\text{S}]^+$  ( $\text{M} + \text{H}^+$ ) 387.1737, found 387.1739.

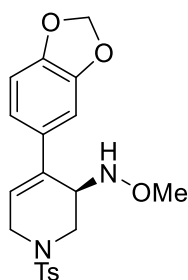

**2l**

Compound **2l** was obtained in 61% yield (49.1 mg) according to the general procedure and purified by chromatography (petroleum ether/ethyl acetate = 5:1). White solid.  $[\alpha]_{\text{D}}^{20} = -53.2^\circ$  ( $c = 2.0, \text{CH}_2\text{Cl}_2$ ). 94% ee (determined by HPLC: Chiralpak OZH Column, 30/70 *i*-PrOH/hexane, 1.0 mL/min, 254 nm; TR = 32.564 min (major), 46.478 min (minor)).  $^1\text{H}$  NMR (400 MHz,  $\text{CDCl}_3$ )  $\delta$  7.73 (d,  $J = 8.0$  Hz, 2H), 7.34 (d,  $J = 8.0$  Hz, 2H), 7.01 – 6.91 (m, 2H), 6.76 (d,  $J = 8.0$  Hz, 1H), 5.99 – 5.90 (m, 3H), 5.72 (s, 1H), 4.24 (d,  $J = 11.6$  Hz, 1H), 4.12 (dd,  $J = 17.2, 4.0$  Hz, 1H), 3.96 (s, 1H), 3.60 (s, 3H), 3.26 (d,  $J = 17.2$  Hz, 1H), 2.49 (dd,  $J = 11.6, 2.0$  Hz, 1H), 2.43 (s, 3H);  $^{13}\text{C}$  NMR (100 MHz,  $\text{CDCl}_3$ )  $\delta$  147.9, 147.3, 143.8, 133.3, 132.9, 129.7, 127.7, 123.0, 119.2, 108.3, 106.2, 101.1, 62.0, 56.7, 45.4, 44.7, 21.5; HRMS-ESI Calcd for  $[\text{C}_{20}\text{H}_{23}\text{N}_2\text{O}_5\text{S}]^+$  ( $\text{M} + \text{H}^+$ ) 403.1322, found 403.1321.

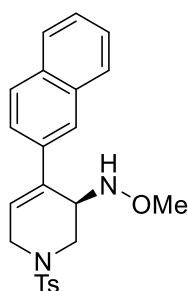

## 2m

Compound **2m** was obtained in 65% yield (53.1 mg) according to the general procedure and purified by chromatography (petroleum ether/ethyl acetate = 10:1). White solid.  $[\alpha]_D^{20} = -44.8^\circ$  ( $c = 2.2$ ,  $\text{CH}_2\text{Cl}_2$ ). 94% ee (determined by HPLC: Chiralpak OZH Column, 20/80 *i*-PrOH/hexane, 1.0 mL/min, 254 nm; TR = 26.268 min (major), 31.998 min (minor)).  $^1\text{H}$  NMR (400 MHz,  $\text{CDCl}_3$ )  $\delta$  7.95 (s, 1H), 7.83 – 7.73 (m, 5H), 7.57 (dd,  $J = 8.4, 1.6$  Hz, 1H), 7.51 – 7.43 (m, 2H), 7.36 (d,  $J = 8.0$  Hz, 2H), 6.22 (dd,  $J = 4.0, 2.4$  Hz, 1H), 5.80 (s, 1H), 4.32 (d,  $J = 12.0$  Hz, 1H), 4.26 – 4.16 (m, 2H), 3.64 (s, 3H), 3.36 (d,  $J = 17.6$  Hz, 1H), 2.59 (dd,  $J = 12.0, 2.1$  Hz, 1H), 2.44 (s, 3H);  $^{13}\text{C}$  NMR (100 MHz,  $\text{CDCl}_3$ )  $\delta$  143.8, 135.7, 133.6, 133.3, 132.9, 132.9, 129.7, 128.2(1), 128.1(7), 127.8, 127.5, 126.3, 126.1, 124.5, 123.7, 62.1, 56.5, 45.5, 44.9, 21.5; HRMS-ESI Calcd for  $[\text{C}_{23}\text{H}_{25}\text{N}_2\text{O}_3\text{S}]^+$  ( $\text{M} + \text{H}^+$ ) 409.1580, found 409.1580.

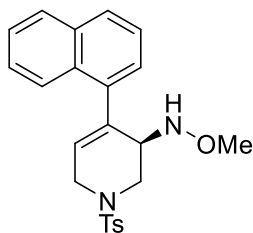

## 2n

Compound **2n** was obtained in 48% yield (39.2 mg) according to the general procedure and purified by chromatography (petroleum ether/ethyl acetate = 10:1). White solid.  $[\alpha]_D^{20} = -38.7^\circ$  ( $c = 1.5$ ,  $\text{CH}_2\text{Cl}_2$ ). 90% ee (determined by HPLC: Chiralpak OZH Column, 20/80 *i*-PrOH/hexane, 1.0 mL/min, 254 nm; TR = 12.803 min (major), 16.874 min (minor)).  $^1\text{H}$  NMR (400 MHz,  $\text{CDCl}_3$ )  $\delta$  7.90 – 7.72 (m, 5H), 7.50 – 7.36 (m, 5H), 7.30 (d,  $J = 7.2$  Hz, 1H), 5.87 (t,  $J = 3.2$  Hz, 1H), 5.63 (s, 1H), 4.20 – 4.06 (m, 2H), 3.97 (s, 1H), 3.49 (d,  $J = 16.8$  Hz, 1H), 3.44 (s, 3H), 2.97 (dd,  $J = 11.6, 2.8$  Hz, 1H), 2.48 (s, 3H);  $^{13}\text{C}$  NMR (100 MHz,  $\text{CDCl}_3$ )  $\delta$  143.8, 137.3, 134.3, 133.7, 133.1, 131.4, 129.8, 128.4, 128.1, 127.8, 127.5, 126.1, 126.0, 125.8, 125.2, 125.1, 62.2, 58.9, 45.4, 45.2, 21.5; HRMS-ESI Calcd for  $[\text{C}_{23}\text{H}_{25}\text{N}_2\text{O}_3\text{S}]^+$  ( $\text{M} + \text{H}^+$ ) 409.1580, found 409.1579.

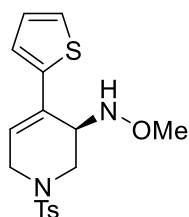

**2o**

Compound **2o** was obtained in 51% yield (37.2 mg) according to the general procedure and purified by chromatography (petroleum ether/ethyl acetate = 8:1). Yellow solid.  $[\alpha]_D^{20} = -48.3^\circ$  ( $c = 1.5$ ,  $\text{CH}_2\text{Cl}_2$ ). 96% ee (determined by HPLC: Chiralpak OZH Column, 25/75 *i*-PrOH/hexane, 1.0 mL/min, 254 nm; TR = 15.348 min (major), 19.304 min (minor)).  $^1\text{H NMR}$  (400 MHz,  $\text{CDCl}_3$ )  $\delta$  7.72 (d,  $J = 8.0$  Hz, 2H), 7.34 (d,  $J = 8.0$  Hz, 2H), 7.21 – 7.12 (m, 2H), 6.97 (dd,  $J = 4.8, 3.6$  Hz, 1H), 6.11 (dd,  $J = 4.4, 2.4$  Hz, 1H), 5.82 (s, 1H), 4.30 (d,  $J = 11.6$  Hz, 1H), 4.16 (dd,  $J = 17.6, 4.4$  Hz, 1H), 3.99 (s, 1H), 3.65 (s, 3H), 3.25 (d,  $J = 17.6$  Hz, 1H), 2.48 – 2.40 (m, 4H);  $^{13}\text{C NMR}$  (100 MHz,  $\text{CDCl}_3$ )  $\delta$  143.9, 142.6, 132.9, 129.7, 128.2, 127.7, 127.4, 124.5, 123.4, 122.4, 62.0, 57.2, 45.1, 44.4, 21.5; HRMS-ESI Calcd for  $[\text{C}_{17}\text{H}_{21}\text{N}_2\text{O}_3\text{S}_2]^+$  ( $\text{M} + \text{H}^+$ ) 365.0988, found 365.0990.

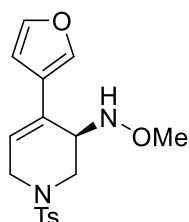

**2p**

Compound **2p** was obtained in 51% yield (35.5 mg) according to the general procedure and purified by chromatography (petroleum ether/ethyl acetate = 8:1). Yellow solid.  $[\alpha]_D^{20} = -48.9^\circ$  ( $c = 1.7$ ,  $\text{CH}_2\text{Cl}_2$ ). 94% ee (determined by HPLC: Chiralpak OZH Column, 20/80 *i*-PrOH/hexane, 1.0 mL/min, 254 nm; TR = 19.653 min (major), 22.737 min (minor)).  $^1\text{H NMR}$  (400 MHz,  $\text{CDCl}_3$ )  $\delta$  7.71 (d,  $J = 8.0$  Hz, 2H), 7.63 (s, 1H), 7.37 – 7.30 (m, 3H), 6.45 (d,  $J = 0.8$  Hz, 1H), 5.94 (dd,  $J = 4.4, 2.4$  Hz, 1H), 5.78 (s, 1H), 4.26 (d,  $J = 11.6$  Hz, 1H), 4.13 (dd,  $J = 17.2, 4.4$  Hz, 1H), 3.82

(s, 1H), 3.62 (s, 3H), 3.22 (d,  $J = 17.2$  Hz, 1H), 2.46 – 2.37 (m, 4H);  $^{13}\text{C}$  NMR (100 MHz,  $\text{CDCl}_3$ )  $\delta$  143.8, 143.3, 139.0, 132.9, 129.7, 127.7, 125.9, 124.7, 121.7, 107.5, 61.9, 56.7, 45.1, 44.3, 21.5; HRMS-ESI Calcd for  $[\text{C}_{17}\text{H}_{21}\text{N}_2\text{O}_4\text{S}]^+$  ( $\text{M} + \text{H}^+$ ) 349.1217, found 349.1218.

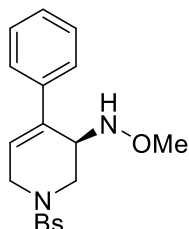

**2q**

Compound **2q** was obtained in 70% yield (59.3 mg) according to the general procedure and purified by chromatography (petroleum ether/ethyl acetate = 10:1). Yellow solid.  $[\alpha]_{\text{D}}^{20} = -47.0^\circ$  ( $c = 2.0$ ,  $\text{CH}_2\text{Cl}_2$ ). 95% ee (determined by HPLC: Chiralpak OZH Column, 20/80 *i*-PrOH/hexane, 1.0 mL/min, 254 nm; TR = 13.544 min (major), 17.459 min (minor)).  $^1\text{H}$  NMR (400 MHz,  $\text{CDCl}_3$ )  $\delta$  7.61 – 7.50 (m, 4H), 7.33 – 7.28 (m, 2H), 7.21 – 7.09 (m, 3H), 5.92 (dd,  $J = 4.4, 2.4$  Hz, 1H), 5.52 (s, 1H), 4.11 (dd,  $J = 12.0, 2.4$  Hz, 1H), 4.00 (dd,  $J = 17.2, 4.4$  Hz, 1H), 3.91 (s, 1H), 3.43 (s, 3H), 3.18 (dt,  $J = 17.6, 2.0$  Hz, 1H), 2.42 (dd,  $J = 12.0, 2.4$  Hz, 1H);  $^{13}\text{C}$  NMR (100 MHz,  $\text{CDCl}_3$ )  $\delta$  138.3, 135.1, 133.9, 132.4, 129.2, 128.6, 128.0(0), 127.9(7), 125.6, 123.7, 62.0, 56.4, 45.3, 44.7; HRMS-ESI Calcd for  $[\text{C}_{18}\text{H}_{20}\text{BrN}_2\text{O}_3\text{S}]^+$  ( $\text{M} + \text{H}^+$ ) 423.0373, found 423.0374.

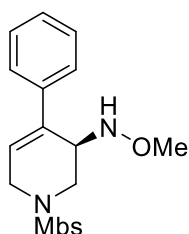

**2r**

Compound **2r** was obtained in 63% yield (47.2 mg) according to the general procedure and purified by chromatography (petroleum ether/ethyl acetate = 8:1). Colorless oil.  $[\alpha]_{\text{D}}^{20} = -53.6^\circ$  ( $c = 2.0$ ,  $\text{CH}_2\text{Cl}_2$ ). 95% ee (determined by HPLC:

Chiralpak OZH Column, 30/70 *i*-PrOH/hexane, 1.0 mL/min, 254 nm; TR = 16.982 min (major), 22.383 min (minor)). <sup>1</sup>H NMR (400 MHz, CDCl<sub>3</sub>) δ 7.63 (d, *J* = 8.8 Hz, 2H), 7.31 (d, *J* = 7.2 Hz, 2H), 7.20 – 7.07 (m, 3H), 6.85 (d, *J* = 8.8 Hz, 2H), 5.93 (dd, *J* = 4.4, 2.4 Hz, 1H), 5.57 (s, 1H), 4.09 (dd, *J* = 12.0, 1.6 Hz, 1H), 3.98 (dd, *J* = 17.2, 4.4 Hz, 1H), 3.91 (s, 1H), 3.71 (s, 3H), 3.43 (s, 3H), 3.14 (d, *J* = 17.2 Hz, 1H), 2.37 (dd, *J* = 12.0, 2.4 Hz, 1H); <sup>13</sup>C NMR (100 MHz, CDCl<sub>3</sub>) δ 163.1, 138.4, 133.7, 129.8, 128.6, 127.9, 127.5, 125.6, 124.0, 114.2, 62.0, 56.4, 55.6, 45.4, 44.8; HRMS-ESI Calcd for [C<sub>19</sub>H<sub>23</sub>N<sub>2</sub>O<sub>4</sub>S]<sup>+</sup> (M + H<sup>+</sup>) 375.1373, found 375.1375.

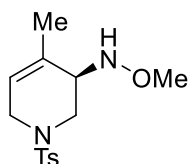

**2s**

Compound **2s** was obtained in 42% yield (24.9 mg) according to the general procedure and purified by chromatography (petroleum ether/ethyl acetate = 10:1). Colorless oil. [ $\alpha$ ]<sub>D</sub><sup>20</sup> = -39.1° (c = 1.0, CH<sub>2</sub>Cl<sub>2</sub>). 71% ee (determined by HPLC: Chiralpak OZH Column, 20/80 *i*-PrOH/hexane, 1.0 mL/min, 254 nm; TR = 10.898 min (major), 13.568 min (minor)). <sup>1</sup>H NMR (400 MHz, CDCl<sub>3</sub>) δ 7.68 (d, *J* = 8.0 Hz, 2H), 7.31 (d, *J* = 8.0 Hz, 2H), 5.48 (s, 1H), 4.00 (dd, *J* = 12.0, 2.0 Hz, 1H), 3.85 (d, *J* = 16.0 Hz, 1H), 3.55 (s, 3H), 3.35 (s, 1H), 3.08 (dd, *J* = 16.0, 2.0 Hz, 1H), 2.48 – 2.38 (m, 4H), 1.77 (d, *J* = 1.6 Hz, 3H); <sup>13</sup>C NMR (100 MHz, CDCl<sub>3</sub>) δ 143.6, 133.0, 131.1, 129.6, 127.7, 121.6, 61.6, 58.5, 44.9, 44.7, 21.5, 21.0; HRMS-ESI Calcd for [C<sub>14</sub>H<sub>21</sub>N<sub>2</sub>O<sub>3</sub>S]<sup>+</sup> (M + H<sup>+</sup>) 297.1267, found 297.1269.

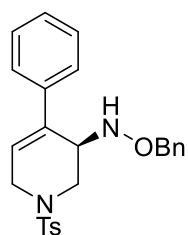

## 2t

Compound **2t** was obtained in 64% yield (55.6 mg) according to the general procedure and purified by chromatography (petroleum ether/ethyl acetate = 10:1). White solid.  $[\alpha]_D^{20} = -58.7^\circ$  ( $c = 2.0$ ,  $\text{CH}_2\text{Cl}_2$ ). 92% ee (determined by HPLC: Chiralpak OZH Column, 20/80 *i*-PrOH/hexane, 1.0 mL/min, 254 nm; TR = 15.311 min (major), 17.454 min (minor)).  $^1\text{H}$  NMR (400 MHz,  $\text{CDCl}_3$ )  $\delta$  7.59 (d,  $J = 8.4$  Hz, 2H), 7.23 – 7.06 (m, 12H), 5.89 (dd,  $J = 4.4, 2.4$  Hz, 1H), 5.59 (s, 1H), 4.66 (d,  $J = 12.0$  Hz, 1H), 4.55 (d,  $J = 12.0$  Hz, 1H), 4.21 (dd,  $J = 11.6, 1.6$  Hz, 1H), 3.98 (dd,  $J = 17.6, 4.4$  Hz, 1H), 3.82 (s, 1H), 3.13 (d,  $J = 17.6$  Hz, 1H), 2.35 (dd,  $J = 12.0, 2.4$  Hz, 1H), 2.27 (s, 3H);  $^{13}\text{C}$  NMR (100 MHz,  $\text{CDCl}_3$ )  $\delta$  143.8, 138.2(3), 138.2(1), 133.7, 132.9, 129.7, 128.6, 128.4, 128.3, 127.8, 127.7, 125.5, 123.7, 76.2, 56.9, 45.4, 44.7, 21.5; HRMS-ESI Calcd for  $[\text{C}_{25}\text{H}_{27}\text{N}_2\text{O}_3\text{S}]^+$  ( $\text{M} + \text{H}^+$ ) 435.1737, found 435.1736.

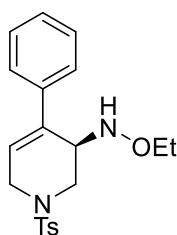

## 2u

Compound **2u** was obtained in 51% yield (38.0 mg) according to the general procedure and purified by chromatography (petroleum ether/ethyl acetate = 10:1). Colorless oil.  $[\alpha]_D^{20} = -85.2^\circ$  ( $c = 0.8$ ,  $\text{CH}_2\text{Cl}_2$ ). 94% ee (determined by HPLC: Chiralpak OZH Column, 20/80 *i*-PrOH/hexane, 1.0 mL/min, 254 nm; TR = 14.371 min (major), 18.042 min (minor)).  $^1\text{H}$  NMR (400 MHz,  $\text{CDCl}_3$ )  $\delta$  7.75 (d,  $J = 8.0$  Hz, 2H), 7.45 (d,  $J = 7.2$  Hz, 2H), 7.36 – 7.28 (m, 5H), 6.09 (dd,  $J = 4.0, 2.4$  Hz, 1H), 4.29 (dd,  $J = 11.6, 2.4$  Hz, 1H), 4.16 (dd,  $J = 17.6, 4.4$  Hz, 1H), 4.09 (s, 1H), 3.82 (q,  $J = 6.8$  Hz, 2H), 3.32 (d,  $J = 17.4$  Hz, 1H), 2.58 (dd,  $J = 11.6, 1.6$  Hz, 1H), 2.44 (s, 3H), 1.16 (t,  $J = 6.8$  Hz, 3H);  $^{13}\text{C}$  NMR (100 MHz,  $\text{CDCl}_3$ )  $\delta$  143.8, 138.5, 133.7, 132.8, 129.7, 128.6, 127.9, 127.8, 125.7, 124.3, 69.6, 56.7, 45.5, 44.8, 21.5, 14.2; HRMS-ESI Calcd for  $[\text{C}_{20}\text{H}_{25}\text{N}_2\text{O}_3\text{S}]^+$  ( $\text{M} + \text{H}^+$ ) 373.1580, found 373.1580.

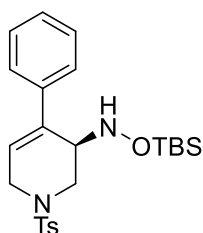

**2v**

Compound **2v** was obtained in 25% yield (22.9 mg) according to the general procedure and purified by chromatography (petroleum ether/ethyl acetate = 10:1). Colorless oil.  $[\alpha]_D^{20} = -36.4^\circ$  ( $c = 2.0$ ,  $\text{CH}_2\text{Cl}_2$ ). 44% ee (determined by HPLC: Chiralpak OZH Column, 10/90 *i*-PrOH/hexane, 1.0 mL/min, 254 nm; TR = 8.816 min (minor), 10.167 min (major)).  $^1\text{H}$  NMR (400 MHz,  $\text{CDCl}_3$ )  $\delta$  7.76 (d,  $J = 8.0$  Hz, 2H), 7.48 – 7.41 (m, 2H), 7.37 – 7.27 (m, 5H), 6.03 (dd,  $J = 4.4, 2.4$  Hz, 1H), 5.16 (s, 1H), 4.47 (d,  $J = 11.2$  Hz, 1H), 4.13 (dd,  $J = 17.6, 4.0$  Hz, 1H), 3.82 (s, 1H), 3.36 (dt,  $J = 17.2, 2.0$  Hz, 1H), 2.53 (dd,  $J = 11.6, 1.6$  Hz, 1H), 2.44 (s, 3H), 0.88 (s, 9H), 0.06 (s, 3H), 0.05 (s, 3H);  $^{13}\text{C}$  NMR (100 MHz,  $\text{CDCl}_3$ )  $\delta$  143.7, 139.3, 134.8, 133.4, 129.7, 128.3, 127.8, 127.6, 126.1, 124.0, 59.1, 45.3, 43.7, 26.2, 21.5, 17.9, -5.3, -5.4; HRMS-ESI Calcd for  $[\text{C}_{24}\text{H}_{35}\text{N}_2\text{O}_3\text{SSi}]^+$  ( $\text{M} + \text{H}^+$ ) 459.2132, found 459.2133.

#### 4.2 General procedure for the synthesis of chiral hydroxylamine ethers **4**:

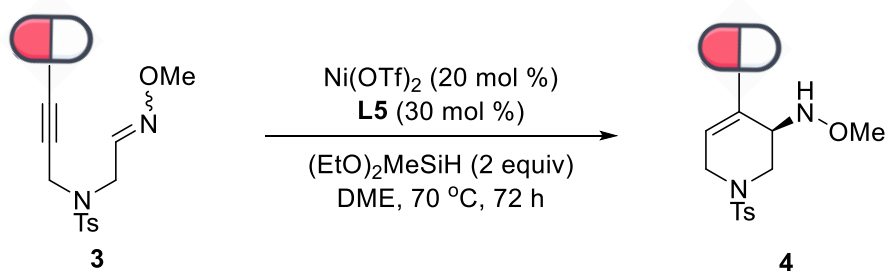

$\text{Ni}(\text{OTf})_2$  (0.02 mmol, 7.1 mg), **L5** (0.03 mmol, 10.0 mg) and DME (4 mL) were introduced into an oven-dried Schlenk tube under nitrogen atmosphere. The resultant solution was stirred at 25 °C under the  $\text{N}_2$  atmosphere for 0.5 h. Then, alkyne-oxime ethers **3** (0.2 mmol) and  $(\text{EtO})_2\text{MeSiH}$  (0.4 mmol, 64  $\mu\text{L}$ ) were introduced into the system. The resulting mixture was stirred at 70 °C (oil bath) for 72 h. Upon completion, the mixture was concentrated and the residue was purified

bychromatography on silica gel (eluent: hexanes/ethyl acetate) to afford the desired products **4**.

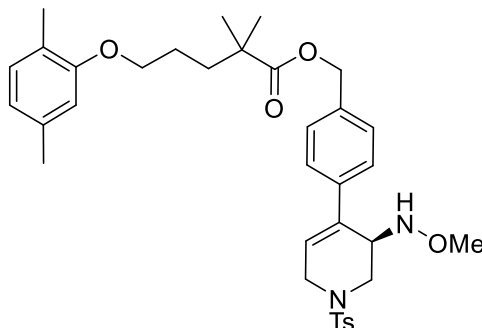

**4a**

Compound **4a** was obtained in 51% yield (63.3 mg) according to the general procedure and purified by chromatography (petroleum ether/ethyl acetate = 5:1). Pale yellow oil.  $[\alpha]_D^{20} = -33.5^\circ$  ( $c = 2.5$ ,  $\text{CH}_2\text{Cl}_2$ ). 95% ee (determined by HPLC: Chiralpak ASH Column, 10/90 *i*-PrOH/hexane, 1.0 mL/min, 254 nm; TR = 31.104 min (minor), 38.144 min (major)).  $^1\text{H}$  NMR (400 MHz,  $\text{CDCl}_3$ )  $\delta$  7.74 (d,  $J = 8.4$  Hz, 2H), 7.45 (d,  $J = 8.4$  Hz, 2H), 7.36 (d,  $J = 8.4$  Hz, 2H), 7.30 (d,  $J = 8.4$  Hz, 2H), 6.98 (d,  $J = 7.2$  Hz, 1H), 6.64 (d,  $J = 7.2$  Hz, 1H), 6.57 (s, 1H), 6.07 (dd,  $J = 4.4, 2.4$  Hz, 1H), 5.72 (s, 1H), 5.09 (s, 2H), 4.27 (dd,  $J = 11.6, 1.6$  Hz, 1H), 4.15 (dd,  $J = 17.2, 4.4$  Hz, 1H), 4.03 (s, 1H), 3.89 – 3.83 (m, 2H), 3.59 (s, 3H), 3.28 (d,  $J = 17.6$  Hz, 1H), 2.49 (dd,  $J = 11.6, 2.4$  Hz, 1H), 2.44 (s, 3H), 2.29 (s, 3H), 2.13 (s, 3H), 1.76 – 1.65 (m, 4H) 1.24 (s, 6H);  $^{13}\text{C}$  NMR (100 MHz,  $\text{CDCl}_3$ )  $\delta$  177.6, 156.9, 143.8, 138.2, 136.4, 136.0, 133.3, 132.9, 130.2, 129.7, 128.1, 127.8, 125.7, 124.3, 123.5, 120.6, 111.8, 67.8, 65.7, 62.0, 56.4, 45.5, 44.8, 42.1, 37.0, 25.1, 21.5, 21.4, 15.7; HRMS-ESI Calcd for  $[\text{C}_{35}\text{H}_{45}\text{N}_2\text{O}_6\text{S}]^+$  ( $\text{M} + \text{H}^+$ ) 621.2993, found 621.2996.

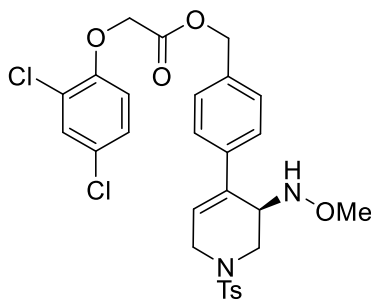

**4b**

Compound **4b** was obtained in 52% yield (61.5 mg) according to the general procedure and purified by chromatography (petroleum ether/ethyl acetate = 2:1). White solid.  $[\alpha]_{\text{D}}^{20} = -36.4^{\circ}$  ( $c = 2.5$ ,  $\text{CH}_2\text{Cl}_2$ ). 95% ee (determined by HPLC: Chiralpak OZH Column, 50/50 *i*-PrOH/hexane, 1.0 mL/min, 254 nm; TR = 30.631 min (major), 44.955 min (minor)).  $^1\text{H}$  NMR (400 MHz,  $\text{CDCl}_3$ )  $\delta$  7.74 (d,  $J = 8.4$  Hz, 2H), 7.47 (d,  $J = 8.4$  Hz, 2H), 7.38 – 7.33 (m, 3H), 7.29 (d,  $J = 8.0$  Hz, 2H), 7.10 (dd,  $J = 8.8, 2.4$  Hz, 1H), 6.72 (d,  $J = 8.8$  Hz, 1H), 6.11 (dd,  $J = 4.4, 2.4$  Hz, 1H), 5.72 (s, 1H), 5.20 (s, 2H), 4.70 (s, 2H), 4.28 (dd,  $J = 12.0, 1.6$  Hz, 1H), 4.16 (dd,  $J = 17.6, 4.4$  Hz, 1H), 4.04 (s, 1H), 3.59 (s, 3H), 3.30 (d,  $J = 17.6$  Hz, 1H), 2.52 (dd,  $J = 12.0, 2.4$  Hz, 1H), 2.44 (s, 3H);  $^{13}\text{C}$  NMR (100 MHz,  $\text{CDCl}_3$ )  $\delta$  167.9, 152.3, 143.8, 138.9, 134.5, 133.3, 132.9, 130.3, 129.7, 128.7, 127.7, 127.5, 127.1, 125.8, 124.6, 124.2, 114.7, 66.7, 66.3, 62.0, 56.4, 45.4, 44.7, 21.5; HRMS-ESI Calcd for  $[\text{C}_{28}\text{H}_{29}\text{Cl}_2\text{N}_2\text{O}_6\text{S}]^+$  ( $\text{M} + \text{H}^+$ ) 591.1118, found 591.1120.

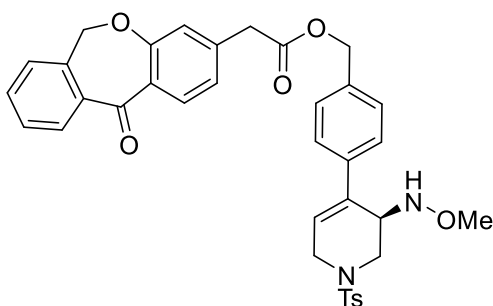

**4c**

Compound **4c** was obtained in 52% yield (66.4 mg) according to the general procedure and purified by chromatography (petroleum ether/ethyl acetate = 2:1). White solid.  $[\alpha]_{\text{D}}^{20} = -35.6^{\circ}$  ( $c = 2.5$ ,  $\text{CH}_2\text{Cl}_2$ ). 94% ee (determined by HPLC:

Chiralpak ADH Column, 50/50 *i*-PrOH/hexane, 1.0 mL/min, 254 nm; TR = 39.377 min (major), 53.527 min (minor)). <sup>1</sup>H NMR (400 MHz, CDCl<sub>3</sub>) δ 8.11 (d, *J* = 2.4 Hz, 1H), 7.87 (dd, *J* = 7.6, 0.8 Hz, 1H), 7.74 (d, *J* = 8.0 Hz, 2H), 7.58 – 7.52 (m, 1H), 7.48 – 7.44 (m, 3H), 7.41 (dd, *J* = 8.4, 2.4 Hz, 1H), 7.37 – 7.33 (m, 3H), 7.30 (d, *J* = 8.4 Hz, 2H), 7.01 (d, *J* = 8.4 Hz, 1H), 6.09 (dd, *J* = 4.4, 2.4 Hz, 1H), 5.71 (s, 1H), 5.17 (s, 2H), 5.12 (s, 2H), 4.27 (dd, *J* = 12.0, 1.6 Hz, 1H), 4.15 (dd, *J* = 17.6, 4.4 Hz, 1H), 4.04 (s, 1H), 3.68 (s, 2H), 3.59 (s, 3H), 3.29 (d, *J* = 17.6 Hz, 1H), 2.51 (dd, *J* = 12.0, 2.4 Hz, 1H), 2.43 (s, 3H); <sup>13</sup>C NMR (100 MHz, CDCl<sub>3</sub>) δ 190.8, 171.2, 160.4, 143.8, 140.3, 138.5, 136.3, 135.5, 135.3, 133.3, 132.9, 132.8, 132.4, 129.7, 129.4, 129.2, 128.5, 127.8, 127.7, 127.5, 125.8, 125.1, 124.4, 121.0, 73.6, 66.3, 62.0, 56.4, 45.4, 44.7, 40.1, 21.5; HRMS-ESI Calcd for [C<sub>36</sub>H<sub>35</sub>N<sub>2</sub>O<sub>7</sub>S]<sup>+</sup> (M + H<sup>+</sup>) 639.2159, found 639.2159.

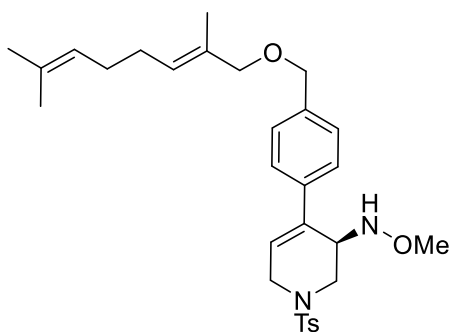

**4d**

Compound **4d** was obtained in 46% yield (48.3 mg) according to the general procedure and purified by chromatography (petroleum ether/ethyl acetate = 10:1). Pale yellow oil.  $[\alpha]_D^{20} = -39.8^\circ$  (*c* = 1.9, CH<sub>2</sub>Cl<sub>2</sub>). 86% ee (determined by HPLC: Chiralpak OZH Column, 20/80 *i*-PrOH/hexane, 1.0 mL/min, 254 nm; TR = 18.042 min (major), 23.713 min (minor)). <sup>1</sup>H NMR (400 MHz, CDCl<sub>3</sub>) δ 7.74 (d, *J* = 8.0 Hz, 2H), 7.44 (d, *J* = 8.0 Hz, 2H), 7.35 (d, *J* = 8.0 Hz, 2H), 7.31 (d, *J* = 8.0 Hz, 2H), 6.08 (dd, *J* = 4.0, 2.4 Hz, 1H), 5.71 (s, 1H), 5.38 (dd, *J* = 6.8, 6.0 Hz, 1H), 5.09 (t, *J* = 6.8 Hz, 1H), 4.47 (s, 2H), 4.25 (dd, *J* = 11.6, 1.6 Hz, 1H), 4.13 (dd, *J* = 17.6, 4.0 Hz, 1H), 4.08 – 3.97 (m, 3H), 3.59 (s, 3H), 3.30 (d, *J* = 17.2 Hz, 1H), 2.53 (dd, *J* = 11.6, 2.4 Hz, 1H), 2.43 (s, 3H), 2.12 – 1.99 (m, 4H), 1.67 (s, 3H), 1.64 (s, 3H), 1.59 (s, 3H); <sup>13</sup>C

NMR (100 MHz, CDCl<sub>3</sub>)  $\delta$  143.8, 140.5, 138.4, 137.7, 133.5, 132.9, 131.6, 129.7, 128.1, 127.8, 125.6, 123.9(2), 123.8(7), 120.7, 71.5, 66.7, 62.0, 56.5, 45.5, 44.8, 39.6, 26.3, 25.7, 21.5, 17.7, 16.5; HRMS-ESI Calcd for [C<sub>30</sub>H<sub>41</sub>N<sub>2</sub>O<sub>4</sub>S]<sup>+</sup> (M + H<sup>+</sup>) 525.2782, found 525.2780.

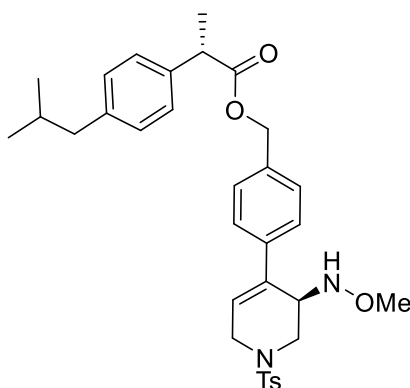

**4e**

Compound **4e** was obtained in 61% yield (70.4 mg) according to the general procedure and purified by chromatography (petroleum ether/ethyl acetate = 8:1). Pale yellow oil.  $[\alpha]_D^{20} = -32.6^\circ$  (c = 2.5, CH<sub>2</sub>Cl<sub>2</sub>). >20:1 dr. <sup>1</sup>H NMR (400 MHz, CDCl<sub>3</sub>)  $\delta$  7.74 (d, *J* = 8.0 Hz, 2H), 7.41 (d, *J* = 8.0 Hz, 2H), 7.35 (d, *J* = 8.0 Hz, 2H), 7.23 – 7.15 (m, 4H), 7.08 (d, *J* = 8.0 Hz, 2H), 6.08 (dd, *J* = 4.4, 2.4 Hz, 1H), 5.72 (s, 1H), 5.10 (d, *J* = 12.8 Hz, 1H), 5.06 (d, *J* = 12.8 Hz, 1H), 4.27 (d, *J* = 10.4 Hz, 1H), 4.16 (dd, *J* = 17.2, 4.4 Hz, 1H), 4.04 (s, 1H), 3.74 (q, *J* = 6.8 Hz, 1H), 3.60 (s, 3H), 3.30 (d, *J* = 17.2 Hz, 1H), 2.51 (dd, *J* = 11.6, 2.4 Hz, 1H), 2.48 – 2.40 (m, 5H), 1.88 – 1.80 (m, 1H), 1.50 (d, *J* = 6.8 Hz, 3H), 0.90 (d, *J* = 6.4 Hz, 6H); <sup>13</sup>C NMR (100 MHz, CDCl<sub>3</sub>)  $\delta$  174.4, 143.8, 140.5, 138.2, 137.5, 135.7, 133.3, 132.8, 129.7, 129.2, 128.0, 127.7, 127.1, 125.6, 124.2, 65.8, 62.0, 56.4, 45.4, 45.0, 44.9, 44.7, 30.1, 22.3, 21.5, 18.3; HRMS-ESI Calcd for [C<sub>33</sub>H<sub>41</sub>N<sub>2</sub>O<sub>5</sub>S]<sup>+</sup> (M + H<sup>+</sup>) 577.2731, found 577.2732.

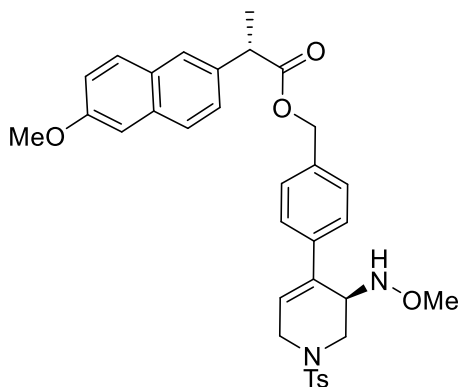

**4f**

Compound **4f** was obtained in 50% yield (60.1 mg) according to the general procedure and purified by chromatography (petroleum ether/ethyl acetate = 3:1). White solid.  $[\alpha]_D^{20} = -34.2^\circ$  ( $c = 2.0$ ,  $\text{CH}_2\text{Cl}_2$ ). >20:1 dr.  $^1\text{H NMR}$  (400 MHz,  $\text{CDCl}_3$ )  $\delta$  7.74 (d,  $J = 8.4$  Hz, 2H), 7.71 – 7.61 (m, 3H), 7.43 – 7.31 (m, 5H), 7.19 (d,  $J = 8.4$  Hz, 2H), 7.14 – 7.10 (m, 2H), 6.05 (dd,  $J = 4.4, 2.4$  Hz, 1H), 5.71 (s, 1H), 5.12 (d,  $J = 12.8$  Hz, 1H), 5.06 (d,  $J = 12.8$  Hz, 1H), 4.27 (dd,  $J = 12.0, 1.6$  Hz, 1H), 4.12 (dd,  $J = 17.6, 4.4$  Hz, 1H), 4.02 (s, 1H), 3.93 – 3.87 (m, 4H), 3.59 (s, 3H), 3.29 (d,  $J = 17.2$  Hz, 1H), 2.50 (dd,  $J = 11.6, 2.4$  Hz, 1H), 2.44 (s, 3H), 1.59 (d,  $J = 7.2$  Hz, 3H);  $^{13}\text{C NMR}$  (100 MHz,  $\text{CDCl}_3$ )  $\delta$  174.4, 157.6, 143.8, 138.2, 135.6, 135.4, 133.6, 133.3, 132.8, 129.7, 129.2, 128.8, 128.1, 127.7, 127.1, 126.2, 125.9, 125.6, 124.3, 118.9, 105.5, 66.0, 62.0, 56.4, 55.2, 45.4(2), 45.3(7), 44.7, 21.5, 18.4; HRMS-ESI Calcd for  $[\text{C}_{34}\text{H}_{37}\text{N}_2\text{O}_6\text{S}]^+$  ( $\text{M} + \text{H}^+$ ) 601.2367, found 601.2367.

### 4.3 Gram scale experiment for the synthesis of **2a**:

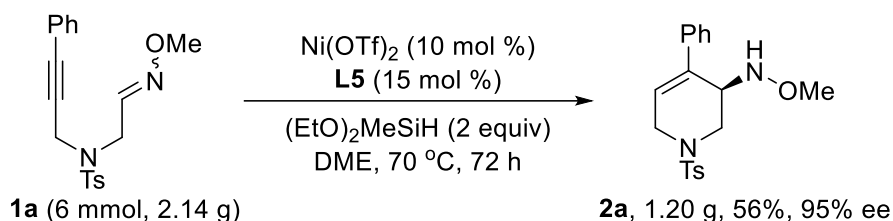

$\text{Ni(OTf)}_2$  (0.6 mmol, 214.1 mg), **L5** (0.9 mmol, 300.1 mg) and DME (60 mL) were introduced into an oven-dried Schlenk tube under nitrogen atmosphere. The resultant solution was stirred at 25 °C under the  $\text{N}_2$  atmosphere for 0.5 h. Then, alkyne-oxime ether **1a** (6 mmol) and  $(\text{EtO})_2\text{MeSiH}$  (12 mmol, 1.92 mL) were introduced into the

system. The resulting mixture was stirred at 70 °C (oil bath) for 72 h. Upon completion, the mixture was concentrated and the residue was purified by chromatography on silica gel (eluent: hexanes/ethyl acetate) to afford the desired product **2a** (1.20g, 56%, 95% ee).

## 5. Crystal Date

**Crystal data and structure refinement for 2q. CCDC Number = 2524659.**

Single crystals suitable for X-ray diffraction were obtained by slow evaporation of the solvent from a petroleum ether/ dichloromethane (3:1) solution of compound **2q** (CCDC 2524659) within 3 days under aerobic conditions.

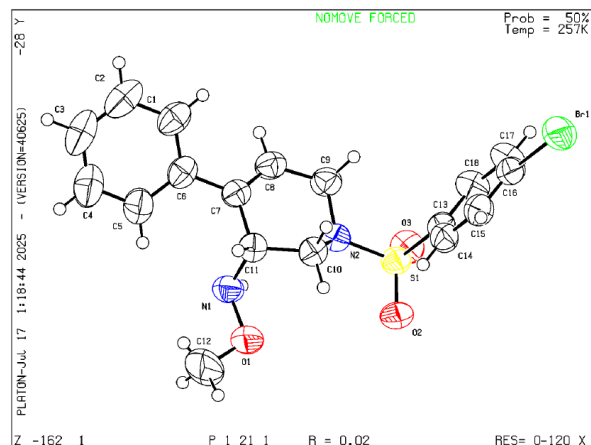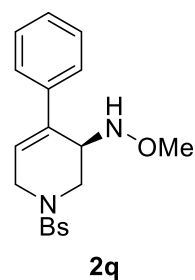

Bond precision: C-C = 0.0044 Å      Wavelength=1.54178

Cell:                    a=10.9109 (2)      b=5.4517 (1)      c=16.0369 (3)  
                               alpha=90            beta=95.255 (1)    gamma=90

Temperature:            257 K

|                        | Calculated         | Reported           |
|------------------------|--------------------|--------------------|
| Volume                 | 949.91 (3)         | 949.91 (3)         |
| Space group            | P 21               | P 1 21 1           |
| Hall group             | P 2yb              | P 2yb              |
| Moiety formula         | C18 H19 Br N2 O3 S | C18 H19 Br N2 O3 S |
| Sum formula            | C18 H19 Br N2 O3 S | C18 H18 Br N2 O3 S |
| Mr                     | 423.31             | 422.31             |
| Dx, g cm <sup>-3</sup> | 1.480              | 1.476              |
| Z                      | 2                  | 2                  |
| Mu (mm <sup>-1</sup> ) | 4.139              | 4.139              |
| F000                   | 432.0              | 430.0              |
| F000'                  | 432.34             |                    |
| h, k, lmax             | 13, 6, 19          | 13, 6, 19          |
| Nref                   | 3501 [ 1951]       | 3372               |
| Tmin, Tmax             | 0.444, 0.419       | 0.468, 0.753       |
| Tmin'                  | 0.336              |                    |

Correction method= # Reported T Limits: Tmin=0.468 Tmax=0.753  
 AbsCorr = MULTI-SCAN

Data completeness= 1.73/0.96      Theta(max)= 68.286

R(reflections)= 0.0224 ( 3308)      wR2(reflections)=  
 0.0614 ( 3372)

S = 1.051      Npar= 239

## 6. References

1. S. Yu, Z. Jin, X. Tong and L. Qi, *Org. Lett.* 2025, **27**, 3697.
2. Z. Yu, L. Liu, and J. Zhang, *Chem. - Eur. J.* 2016, **22**, 8488.

## 7. HPLC Chromatograms

2a: OZH *i*-PrOH/hexane = 20/80,  $v = 1.0$  mL/min,  $\lambda = 254$  nm

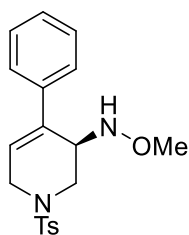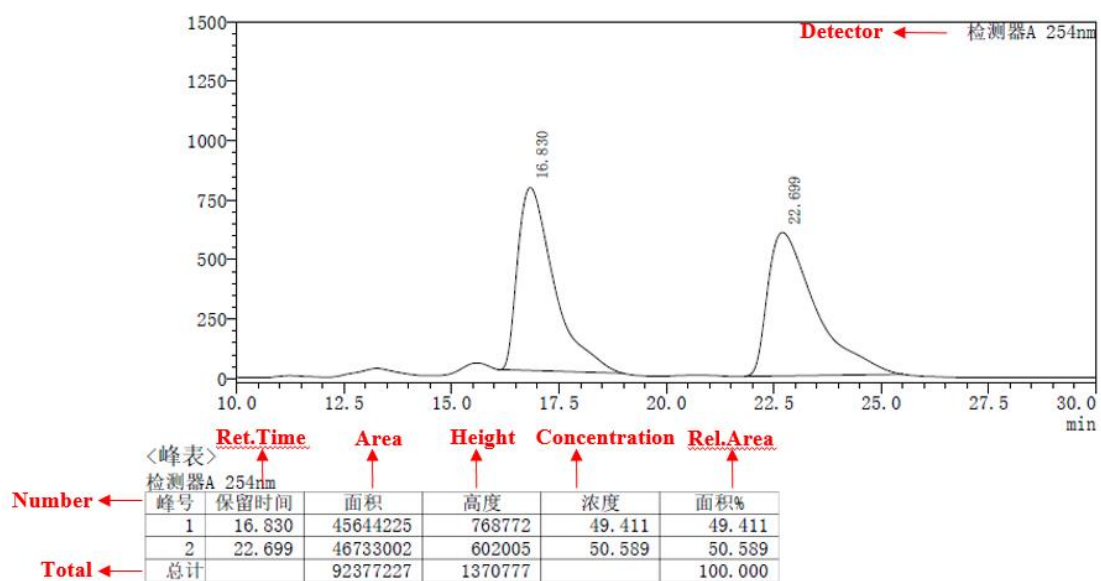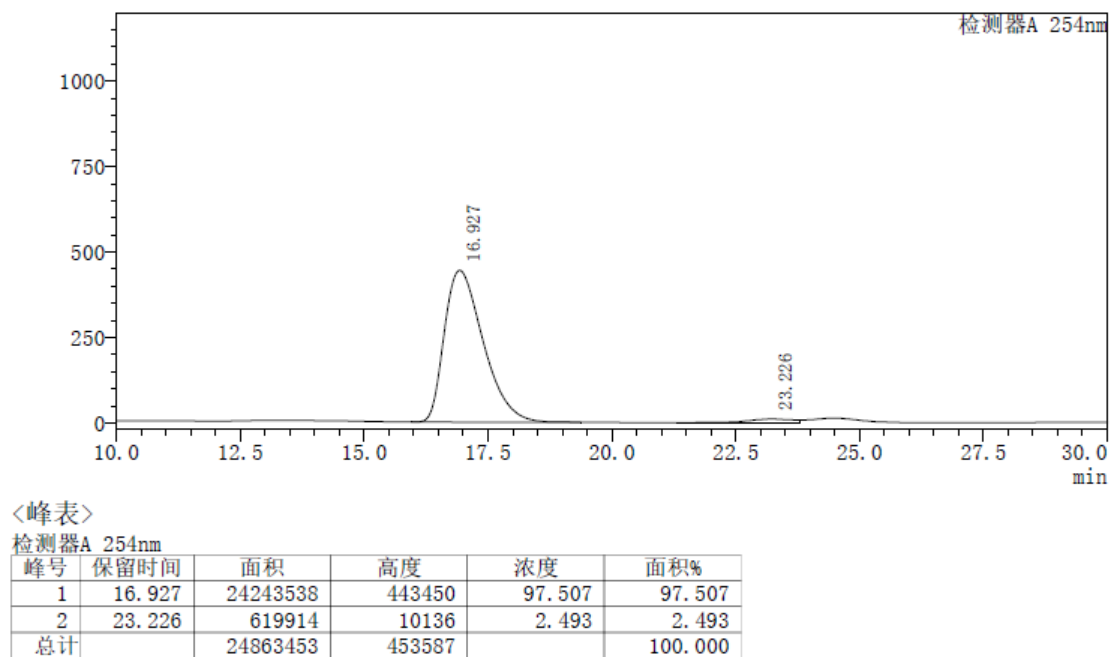

**2b:** OZH, *i*-PrOH/hexane = 30/70,  $v = 1.0$  mL/min,  $\lambda = 254$  nm

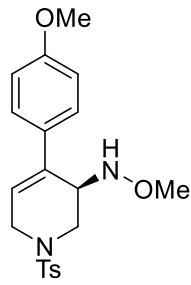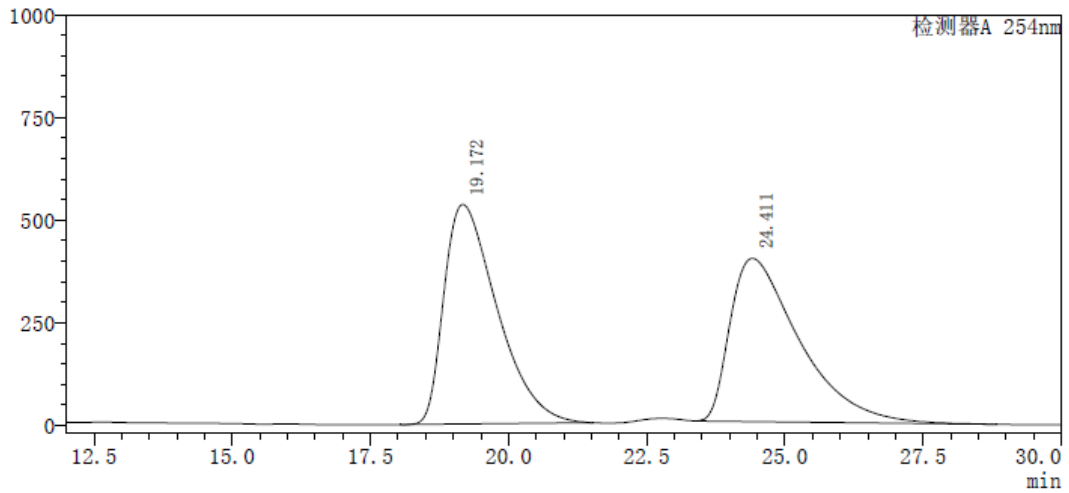

<峰表>

检测器A 254nm

| 峰号 | 保留时间   | 面积       | 高度     | 浓度     | 面积%     |
|----|--------|----------|--------|--------|---------|
| 1  | 19.172 | 35740524 | 534310 | 50.732 | 50.732  |
| 2  | 24.411 | 34709618 | 397480 | 49.268 | 49.268  |
| 总计 |        | 70450142 | 931789 |        | 100.000 |

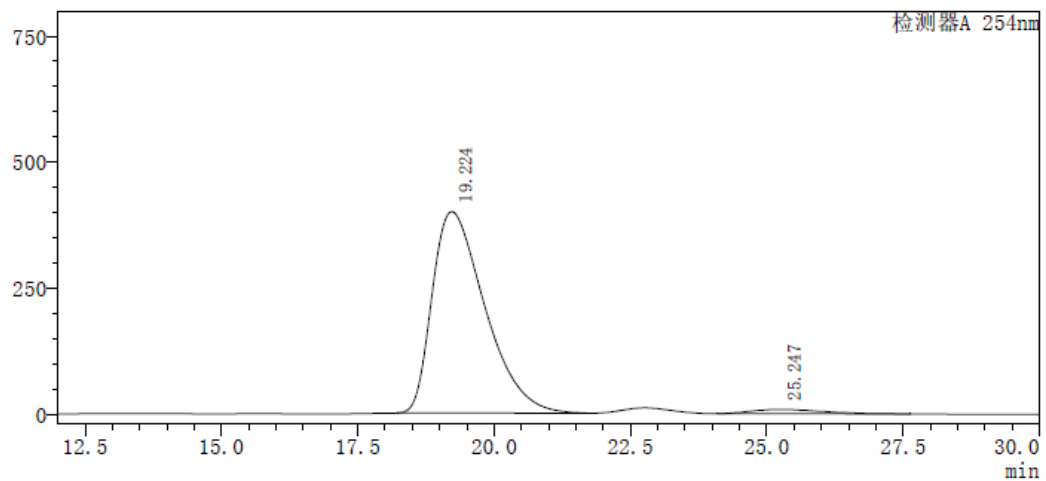

<峰表>

检测器A 254nm

| 峰号 | 保留时间   | 面积       | 高度     | 浓度     | 面积%     |
|----|--------|----------|--------|--------|---------|
| 1  | 19.224 | 26909034 | 399496 | 97.288 | 97.288  |
| 2  | 25.247 | 750009   | 8344   | 2.712  | 2.712   |
| 总计 |        | 27659043 | 407840 |        | 100.000 |

2c: OZH, *i*-PrOH/hexane = 30/70,  $v = 1.0$  mL/min,  $\lambda = 254$  nm

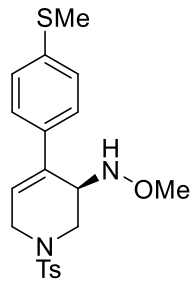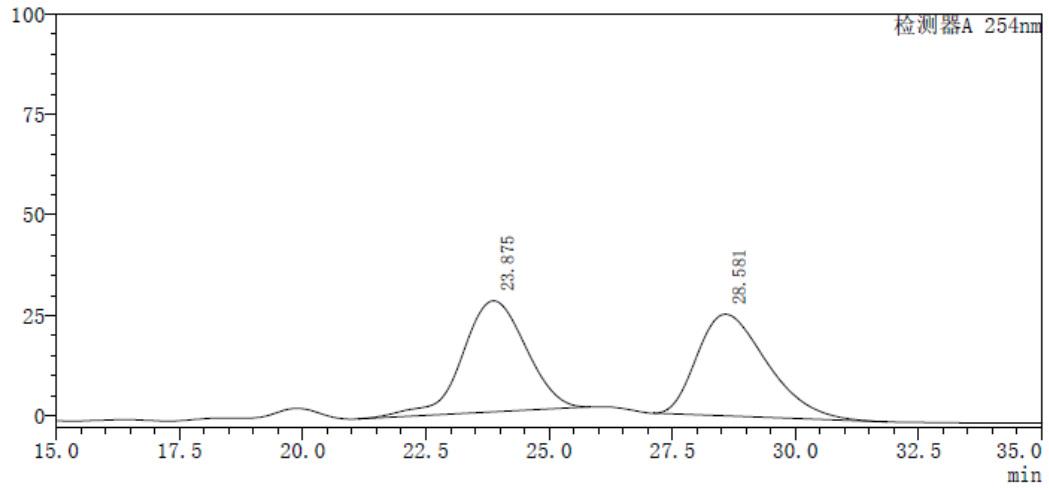

<峰表>

检测器A 254nm

| 峰号 | 保留时间   | 面积      | 高度    | 浓度     | 面积%     |
|----|--------|---------|-------|--------|---------|
| 1  | 23.875 | 2482741 | 27568 | 49.840 | 49.840  |
| 2  | 28.581 | 2498643 | 25250 | 50.160 | 50.160  |
| 总计 |        | 4981384 | 52819 |        | 100.000 |

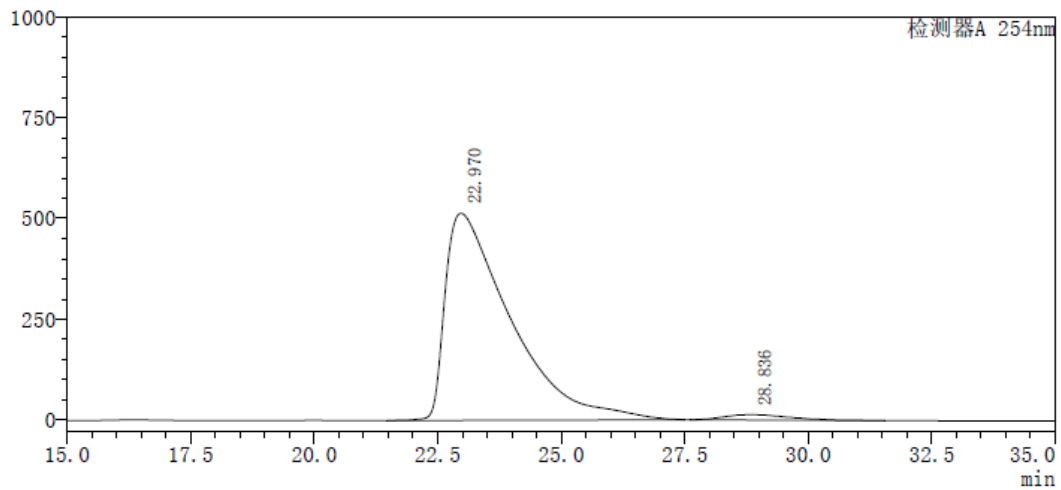

<峰表>

检测器A 254nm

| 峰号 | 保留时间   | 面积       | 高度     | 浓度     | 面积%     |
|----|--------|----------|--------|--------|---------|
| 1  | 22.970 | 47247904 | 513297 | 97.489 | 97.489  |
| 2  | 28.836 | 1216918  | 13474  | 2.511  | 2.511   |
| 总计 |        | 48464822 | 526772 |        | 100.000 |

**2d:** ASH, *i*-PrOH/hexane = 5/95,  $v = 1.0$  mL/min,  $\lambda = 254$  nm

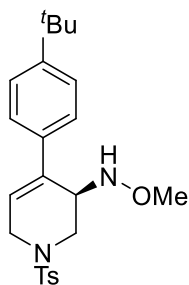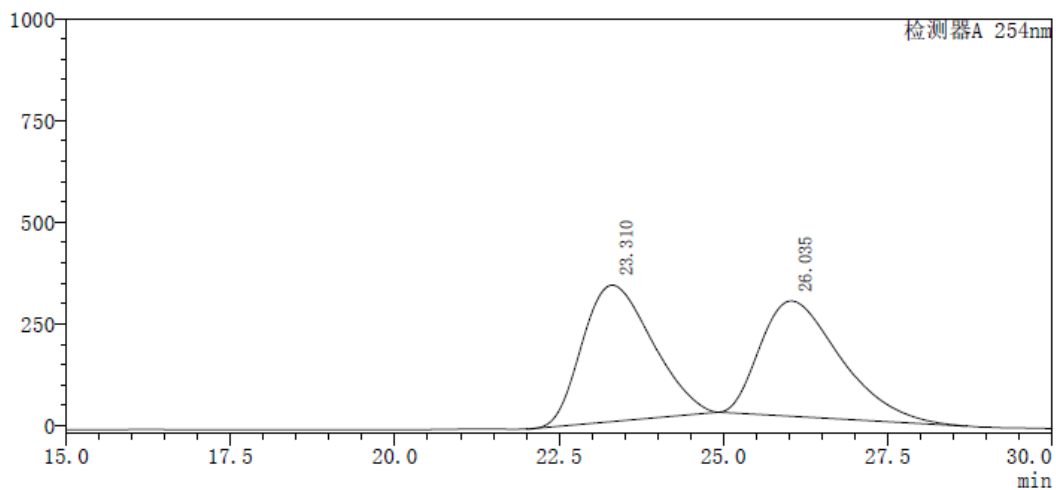

<峰表>

检测器A 254nm

| 峰号 | 保留时间   | 面积       | 高度     | 浓度     | 面积%     |
|----|--------|----------|--------|--------|---------|
| 1  | 23.310 | 24849981 | 334823 | 50.686 | 50.686  |
| 2  | 26.035 | 24177402 | 283095 | 49.314 | 49.314  |
| 总计 |        | 49027383 | 617918 |        | 100.000 |

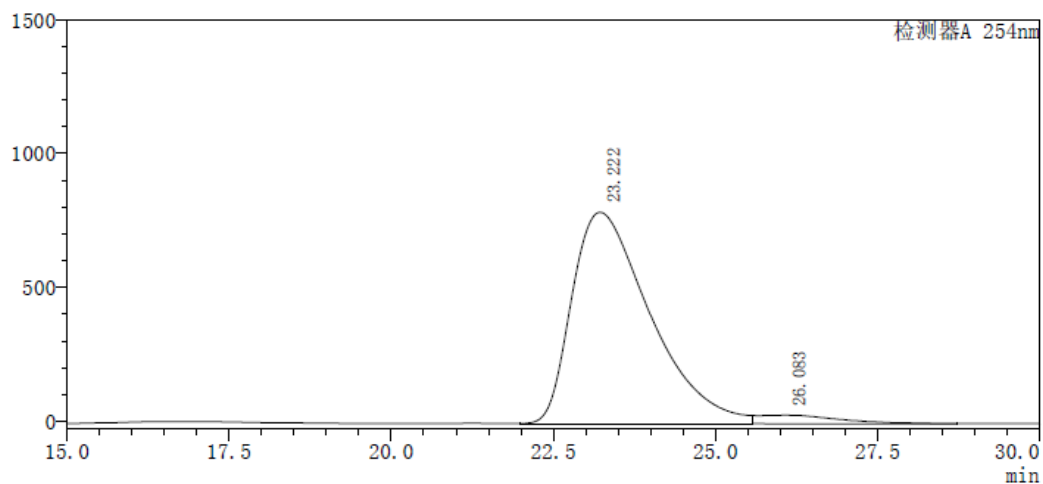

<峰表>

检测器A 254nm

| 峰号 | 保留时间   | 面积       | 高度     | 浓度     | 面积%     |
|----|--------|----------|--------|--------|---------|
| 1  | 23.222 | 66313130 | 788649 | 95.909 | 95.909  |
| 2  | 26.083 | 2828906  | 31918  | 4.091  | 4.091   |
| 总计 |        | 69142036 | 820567 |        | 100.000 |

2e: OZH, *i*-PrOH/hexane = 30/70,  $v = 1.0$  mL/min,  $\lambda = 254$  nm

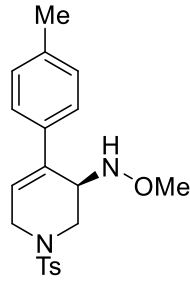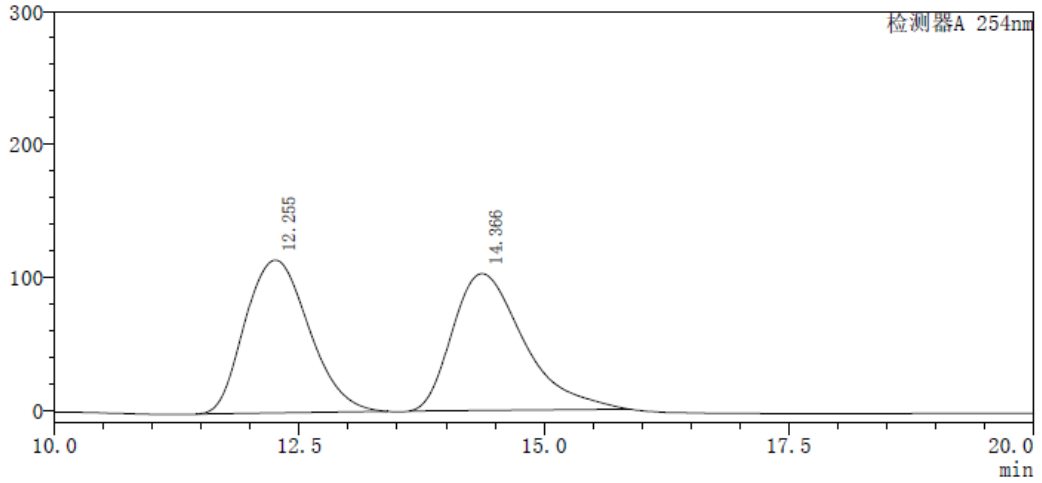

<峰表>

检测器A 254nm

| 峰号 | 保留时间   | 面积       | 高度     | 浓度     | 面积%     |
|----|--------|----------|--------|--------|---------|
| 1  | 12.255 | 5241332  | 115063 | 50.054 | 50.054  |
| 2  | 14.366 | 5230119  | 102905 | 49.946 | 49.946  |
| 总计 |        | 10471451 | 217968 |        | 100.000 |

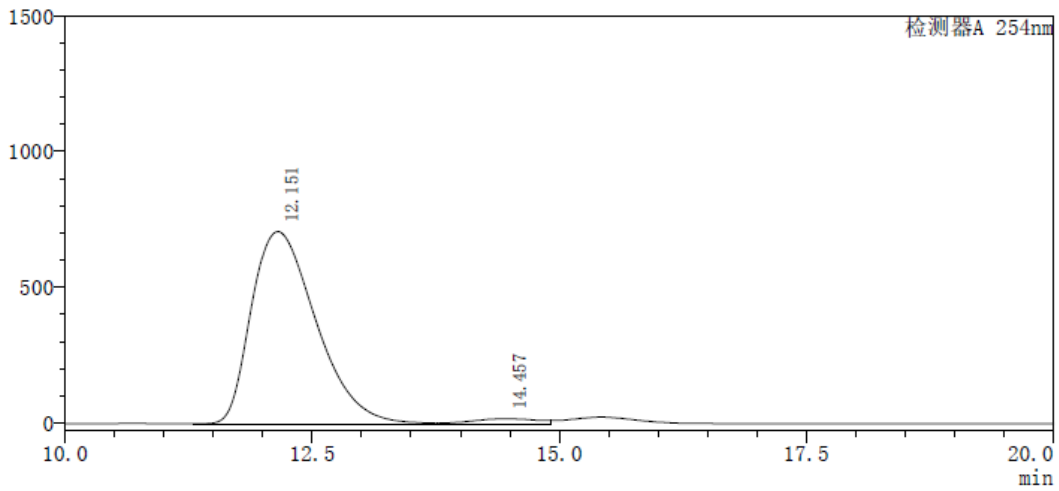

<峰表>

检测器A 254nm

| 峰号 | 保留时间   | 面积       | 高度     | 浓度     | 面积%     |
|----|--------|----------|--------|--------|---------|
| 1  | 12.151 | 32245745 | 707348 | 97.424 | 97.424  |
| 2  | 14.457 | 852744   | 18742  | 2.576  | 2.576   |
| 总计 |        | 33098490 | 726090 |        | 100.000 |

2f: OZH, *i*-PrOH/hexane = 20/80,  $\nu = 1.0$  mL/min,  $\lambda = 254$  nm

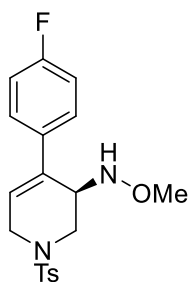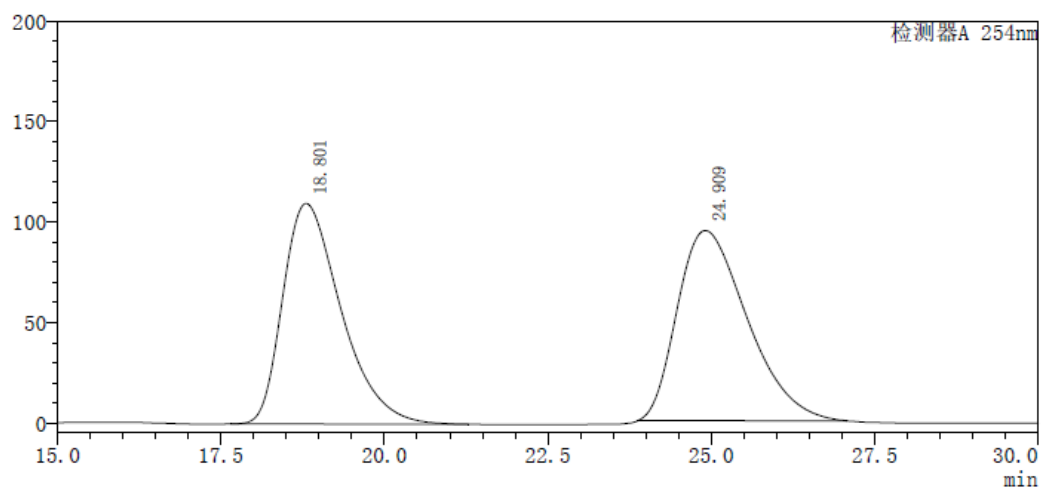

<峰表>

检测器A 254nm

| 峰号 | 保留时间   | 面积       | 高度     | 浓度     | 面积%     |
|----|--------|----------|--------|--------|---------|
| 1  | 18.801 | 6825066  | 109681 | 49.119 | 49.119  |
| 2  | 24.909 | 7069981  | 94589  | 50.881 | 50.881  |
| 总计 |        | 13895047 | 204270 |        | 100.000 |

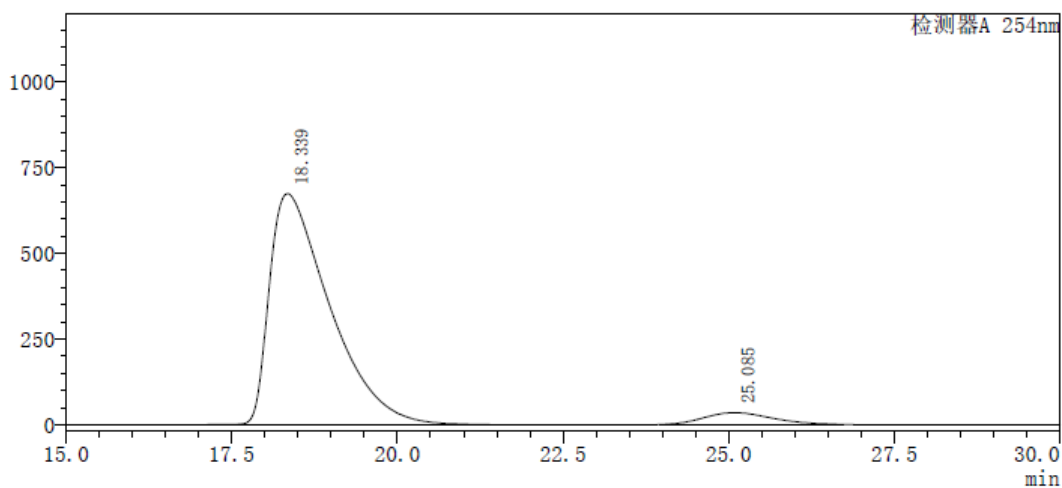

<峰表>

检测器A 254nm

| 峰号 | 保留时间   | 面积       | 高度     | 浓度     | 面积%     |
|----|--------|----------|--------|--------|---------|
| 1  | 18.339 | 42698854 | 673524 | 94.631 | 94.631  |
| 2  | 25.085 | 2422749  | 34338  | 5.369  | 5.369   |
| 总计 |        | 45121603 | 707862 |        | 100.000 |

2g: OZH, *i*-PrOH/hexane = 20/80,  $v = 1.0$  mL/min,  $\lambda = 254$  nm

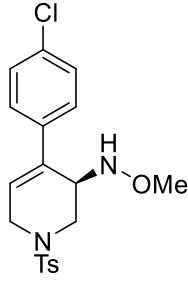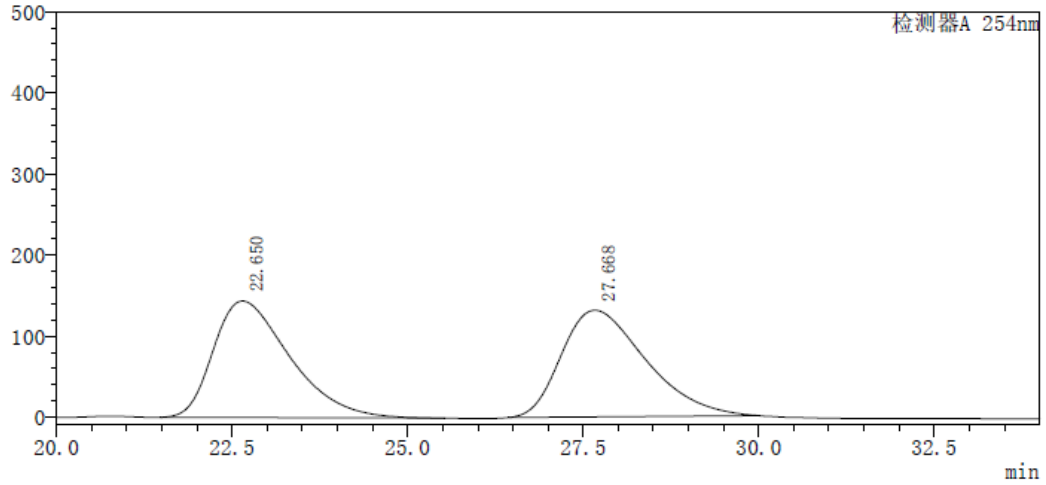

<峰表>

检测器A 254nm

| 峰号 | 保留时间   | 面积       | 高度     | 浓度     | 面积%     |
|----|--------|----------|--------|--------|---------|
| 1  | 22.650 | 10852233 | 143551 | 49.700 | 49.700  |
| 2  | 27.668 | 10983367 | 131453 | 50.300 | 50.300  |
| 总计 |        | 21835600 | 275003 |        | 100.000 |

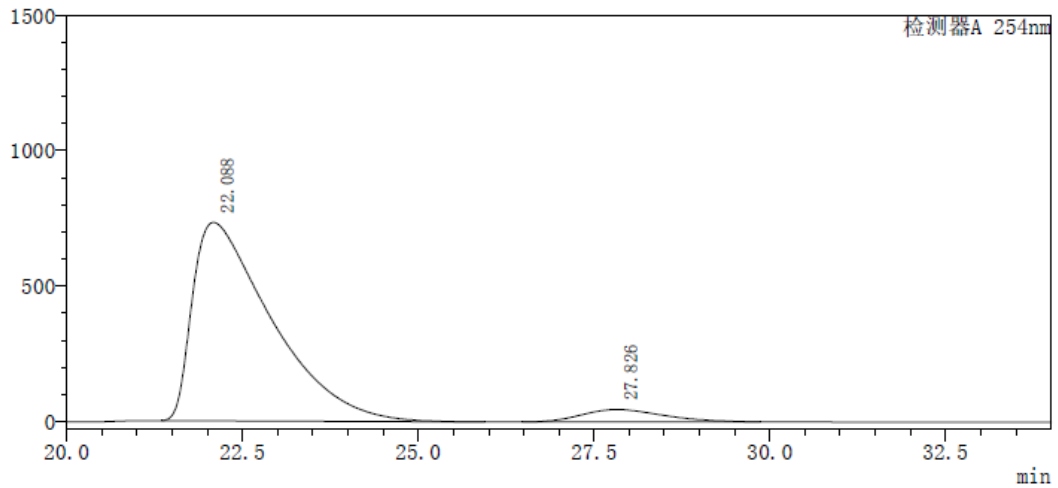

<峰表>

检测器A 254nm

| 峰号 | 保留时间   | 面积       | 高度     | 浓度     | 面积%     |
|----|--------|----------|--------|--------|---------|
| 1  | 22.088 | 57391692 | 732116 | 94.013 | 94.013  |
| 2  | 27.826 | 3654739  | 45438  | 5.987  | 5.987   |
| 总计 |        | 61046431 | 777554 |        | 100.000 |

**2h:** OZH, *i*-PrOH/hexane = 20/80,  $v = 1.0$  mL/min,  $\lambda = 254$  nm

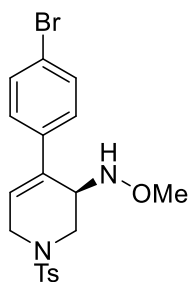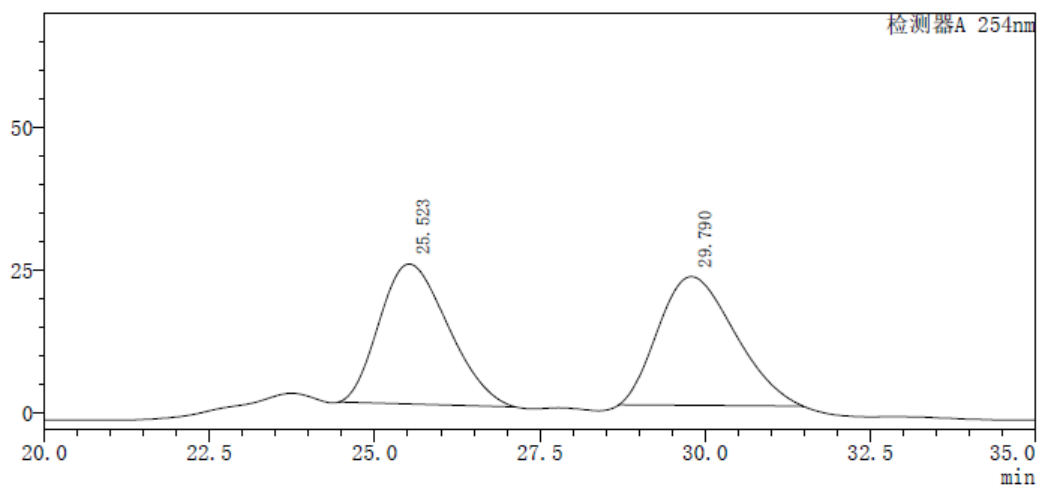

<峰表>

检测器A 254nm

| 峰号 | 保留时间   | 面积      | 高度    | 浓度     | 面积%     |
|----|--------|---------|-------|--------|---------|
| 1  | 25.523 | 1771835 | 24472 | 49.344 | 49.344  |
| 2  | 29.790 | 1818916 | 22486 | 50.656 | 50.656  |
| 总计 |        | 3590751 | 46958 |        | 100.000 |

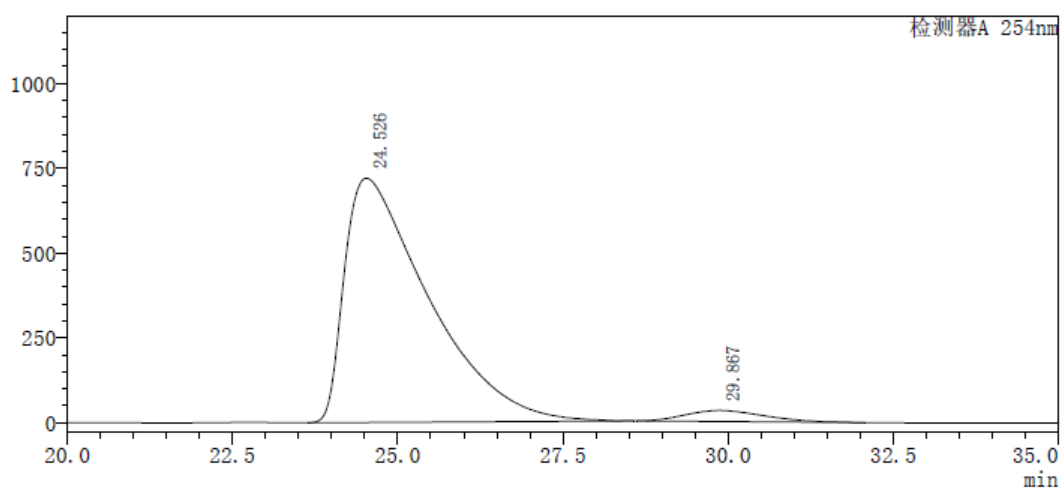

<峰表>

检测器A 254nm

| 峰号 | 保留时间   | 面积       | 高度     | 浓度     | 面积%     |
|----|--------|----------|--------|--------|---------|
| 1  | 24.526 | 63796022 | 719889 | 95.916 | 95.916  |
| 2  | 29.867 | 2716283  | 32320  | 4.084  | 4.084   |
| 总计 |        | 66512305 | 752209 |        | 100.000 |

2i: OZH, *i*-PrOH/hexane = 25/75,  $v = 1.0$  mL/min,  $\lambda = 254$  nm

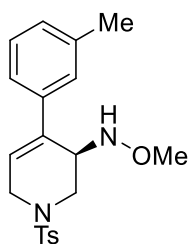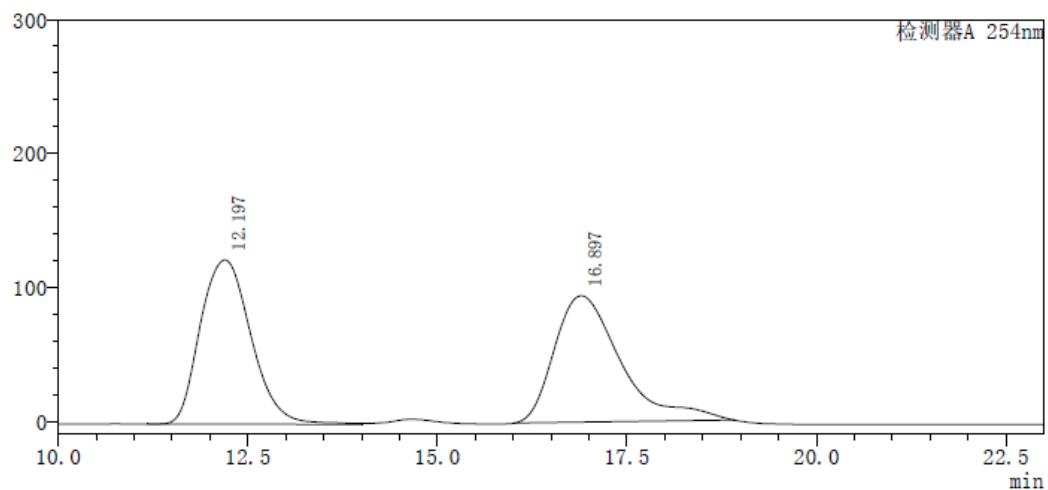

<峰表>

检测器A 254nm

| 峰号 | 保留时间   | 面积       | 高度     | 浓度     | 面积%     |
|----|--------|----------|--------|--------|---------|
| 1  | 12.197 | 5722906  | 122722 | 49.823 | 49.823  |
| 2  | 16.897 | 5763497  | 94428  | 50.177 | 50.177  |
| 总计 |        | 11486403 | 217151 |        | 100.000 |

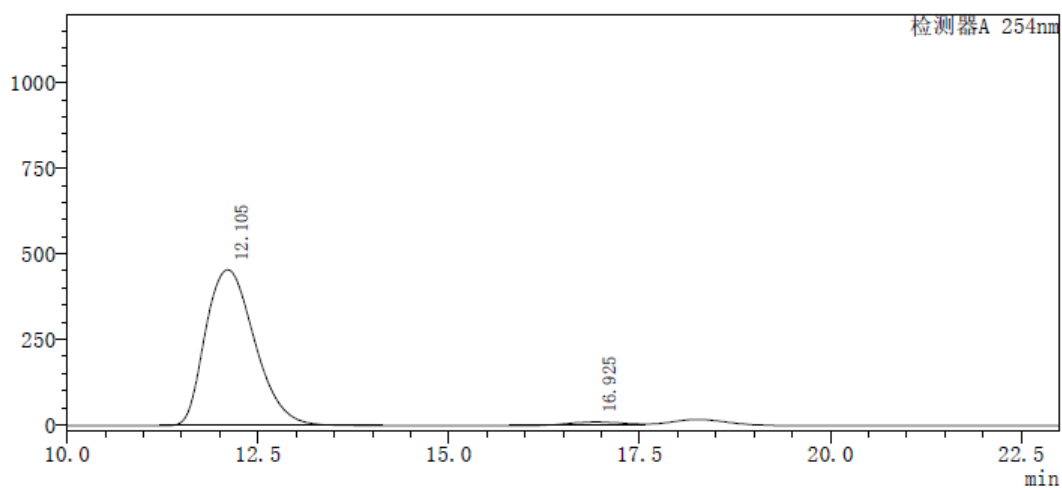

<峰表>

检测器A 254nm

| 峰号 | 保留时间   | 面积       | 高度     | 浓度     | 面积%     |
|----|--------|----------|--------|--------|---------|
| 1  | 12.105 | 20446340 | 455251 | 97.316 | 97.316  |
| 2  | 16.925 | 563828   | 10581  | 2.684  | 2.684   |
| 总计 |        | 21010168 | 465832 |        | 100.000 |

2j: OZH, *i*-PrOH/hexane =35/65,  $v = 1.0 \text{ mL/min}$ ,  $\lambda = 254 \text{ nm}$

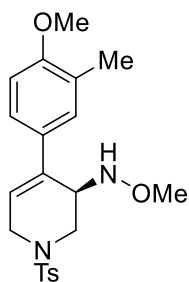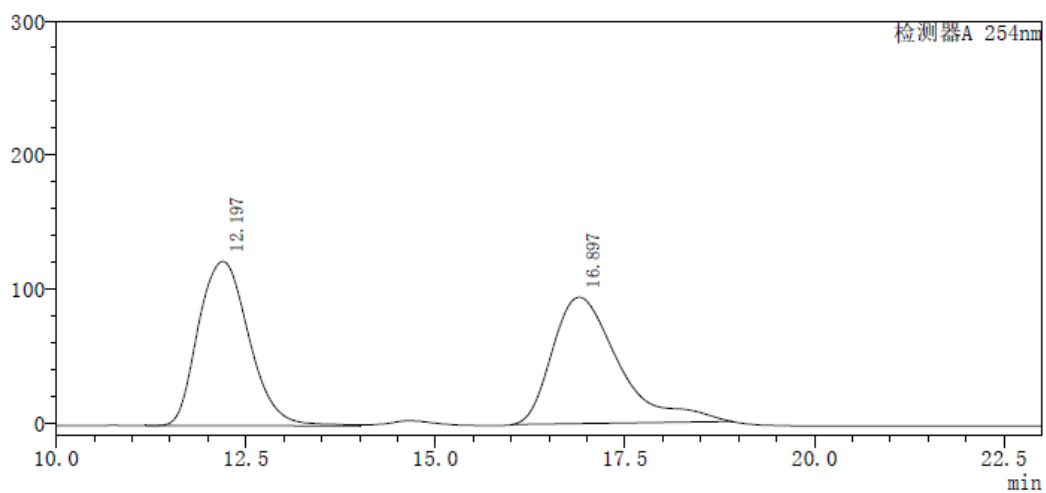

<峰表>

检测器A 254nm

| 峰号 | 保留时间   | 面积       | 高度     | 浓度     | 面积%     |
|----|--------|----------|--------|--------|---------|
| 1  | 12.197 | 5722906  | 122722 | 49.823 | 49.823  |
| 2  | 16.897 | 5763497  | 94428  | 50.177 | 50.177  |
| 总计 |        | 11486403 | 217151 |        | 100.000 |

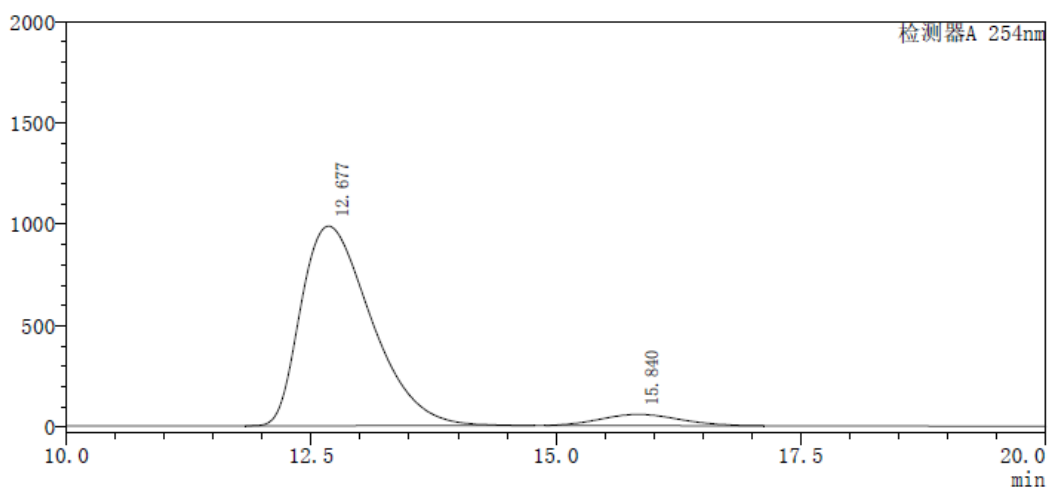

<峰表>

检测器A 254nm

| 峰号 | 保留时间   | 面积       | 高度      | 浓度     | 面积%     |
|----|--------|----------|---------|--------|---------|
| 1  | 12.677 | 49404921 | 983532  | 94.105 | 94.105  |
| 2  | 15.840 | 3094771  | 54971   | 5.895  | 5.895   |
| 总计 |        | 52499692 | 1038503 |        | 100.000 |

**2k:** OZH, *i*-PrOH/hexane = 20/80,  $v = 1.0$  mL/min,  $\lambda = 254$  nm

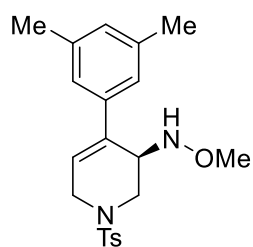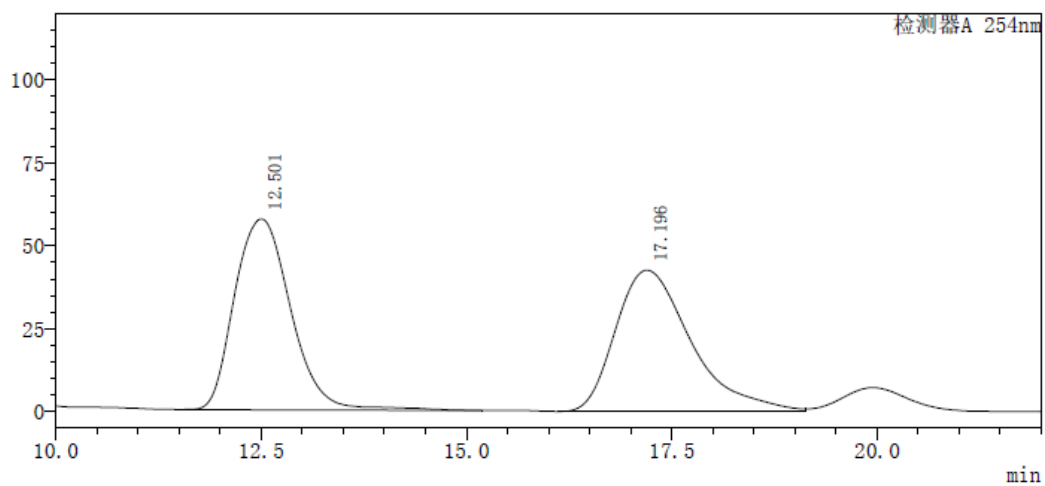

<峰表>

检测器A 254nm

| 峰号 | 保留时间   | 面积      | 高度    | 浓度     | 面积%     |
|----|--------|---------|-------|--------|---------|
| 1  | 12.501 | 2742155 | 57438 | 50.192 | 50.192  |
| 2  | 17.196 | 2721209 | 42530 | 49.808 | 49.808  |
| 总计 |        | 5463364 | 99969 |        | 100.000 |

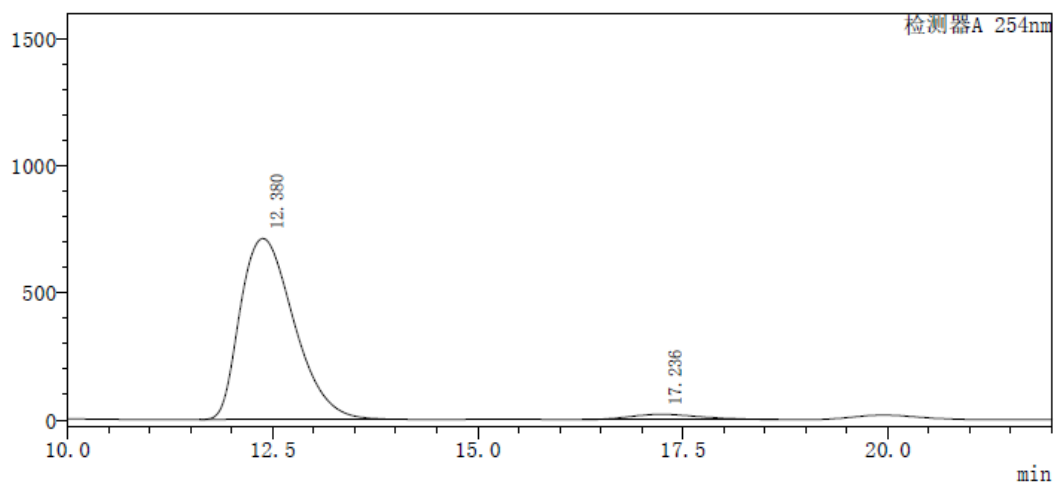

<峰表>

检测器A 254nm

| 峰号 | 保留时间   | 面积       | 高度     | 浓度     | 面积%     |
|----|--------|----------|--------|--------|---------|
| 1  | 12.380 | 32472193 | 711449 | 96.491 | 96.491  |
| 2  | 17.236 | 1180879  | 19998  | 3.509  | 3.509   |
| 总计 |        | 33653072 | 731447 |        | 100.000 |

2l: OZH, *i*-PrOH/hexane = 30/70,  $v = 1.0$  mL/min,  $\lambda = 254$  nm

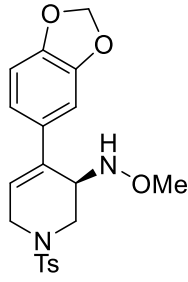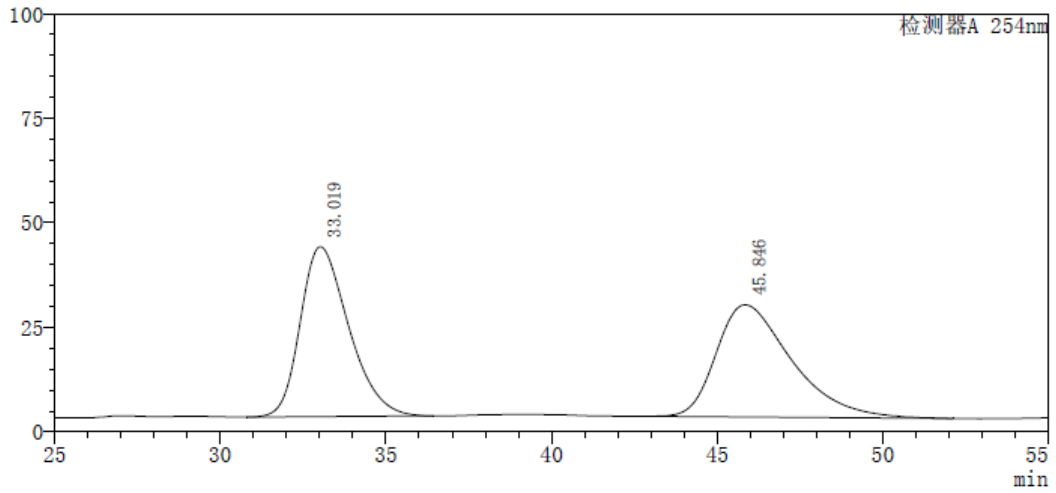

<峰表>

检测器A 254nm

| 峰号 | 保留时间   | 面积      | 高度    | 浓度     | 面积%     |
|----|--------|---------|-------|--------|---------|
| 1  | 33.019 | 4131544 | 40588 | 49.348 | 49.348  |
| 2  | 45.846 | 4240681 | 26791 | 50.652 | 50.652  |
| 总计 |        | 8372225 | 67379 |        | 100.000 |

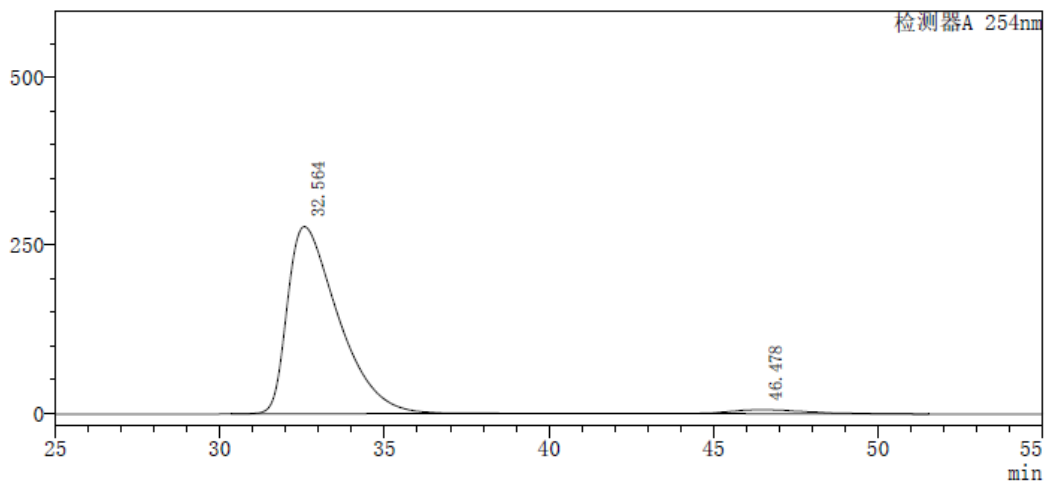

<峰表>

检测器A 254nm

| 峰号 | 保留时间   | 面积       | 高度     | 浓度     | 面积%     |
|----|--------|----------|--------|--------|---------|
| 1  | 32.564 | 30223583 | 279168 | 96.932 | 96.932  |
| 2  | 46.478 | 956676   | 6143   | 3.068  | 3.068   |
| 总计 |        | 31180259 | 285311 |        | 100.000 |

**2m:** OZH, *i*-PrOH/hexane = 20/80,  $v = 1.0 \text{ mL/min}$ ,  $\lambda = 254 \text{ nm}$

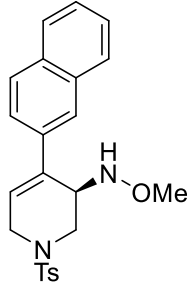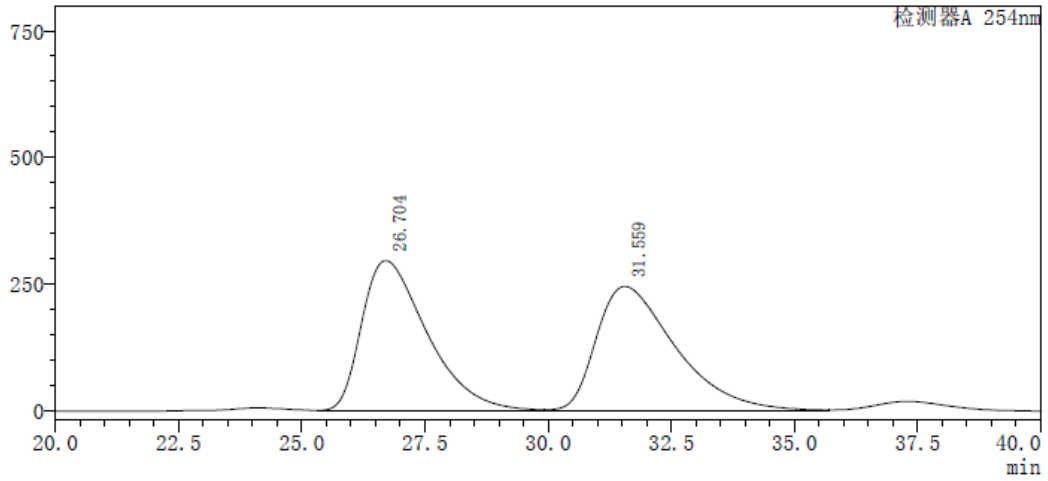

<峰表>

检测器A 254nm

| 峰号 | 保留时间   | 面积       | 高度     | 浓度     | 面积%     |
|----|--------|----------|--------|--------|---------|
| 1  | 26.704 | 27830557 | 298209 | 49.828 | 49.828  |
| 2  | 31.559 | 28023068 | 247045 | 50.172 | 50.172  |
| 总计 |        | 55853625 | 545254 |        | 100.000 |

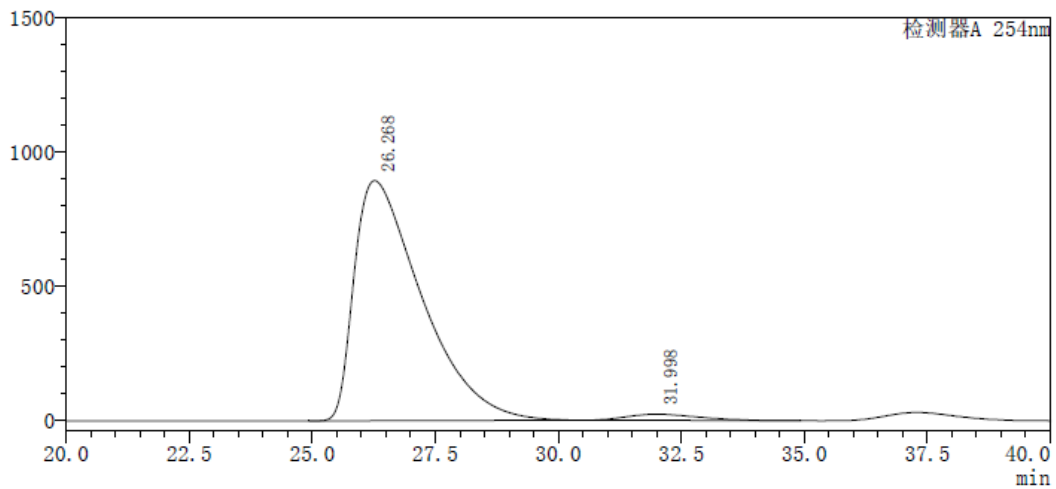

<峰表>

检测器A 254nm

| 峰号 | 保留时间   | 面积       | 高度     | 浓度     | 面积%     |
|----|--------|----------|--------|--------|---------|
| 1  | 26.268 | 85433455 | 892490 | 97.337 | 97.337  |
| 2  | 31.998 | 2337034  | 22627  | 2.663  | 2.663   |
| 总计 |        | 87770489 | 915117 |        | 100.000 |

**2n:** OZH, *i*-PrOH/hexane = 20/80,  $v = 1.0$  mL/min,  $\lambda = 254$  nm

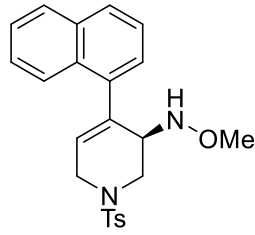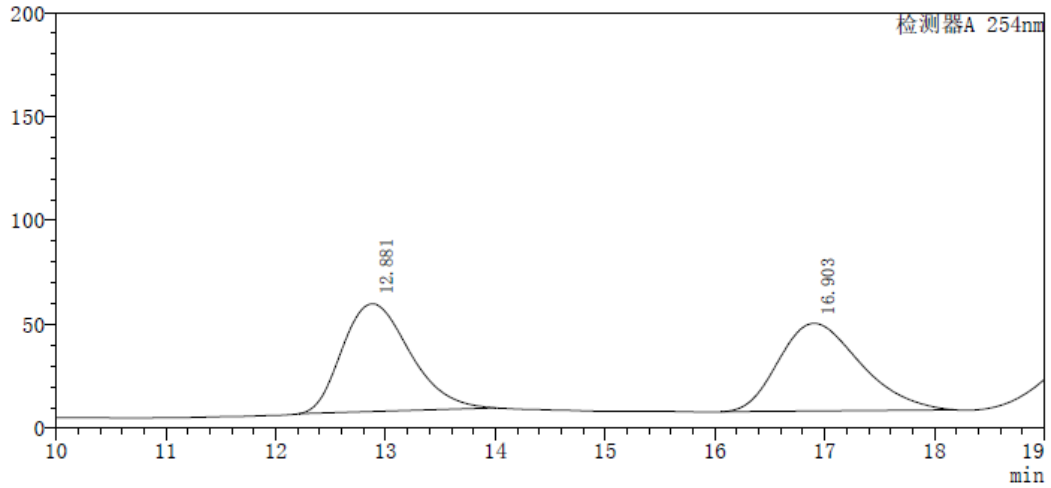

<峰表>

检测器A 254nm

| 峰号 | 保留时间   | 面积      | 高度    | 浓度     | 面积%     |
|----|--------|---------|-------|--------|---------|
| 1  | 12.881 | 2222016 | 51775 | 50.335 | 50.335  |
| 2  | 16.903 | 2192407 | 42187 | 49.665 | 49.665  |
| 总计 |        | 4414423 | 93963 |        | 100.000 |

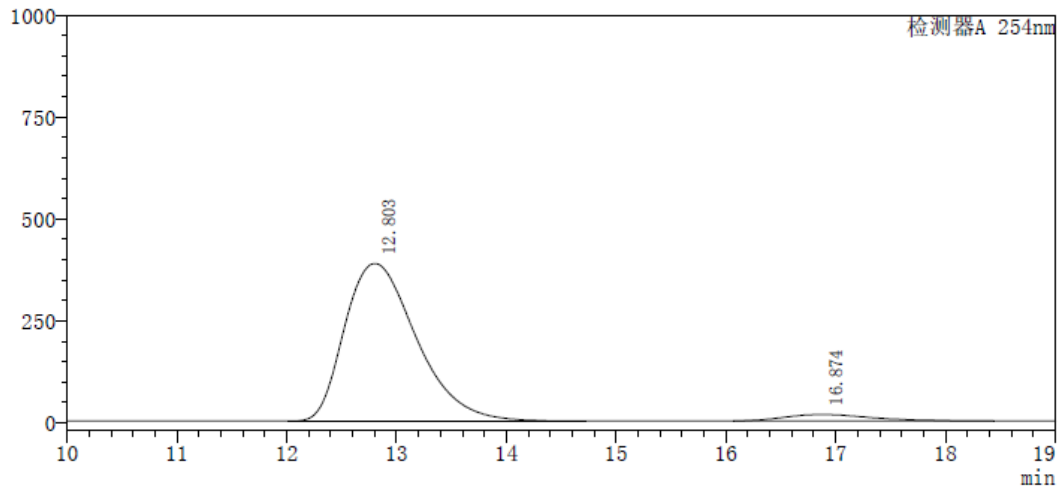

<峰表>

检测器A 254nm

| 峰号 | 保留时间   | 面积       | 高度     | 浓度     | 面积%     |
|----|--------|----------|--------|--------|---------|
| 1  | 12.803 | 17613761 | 386515 | 95.238 | 95.238  |
| 2  | 16.874 | 880694   | 16036  | 4.762  | 4.762   |
| 总计 |        | 18494454 | 402551 |        | 100.000 |

2o: OZH, *i*-PrOH/hexane = 25/75,  $v = 1.0$  mL/min,  $\lambda = 254$  nm

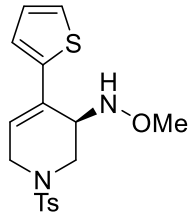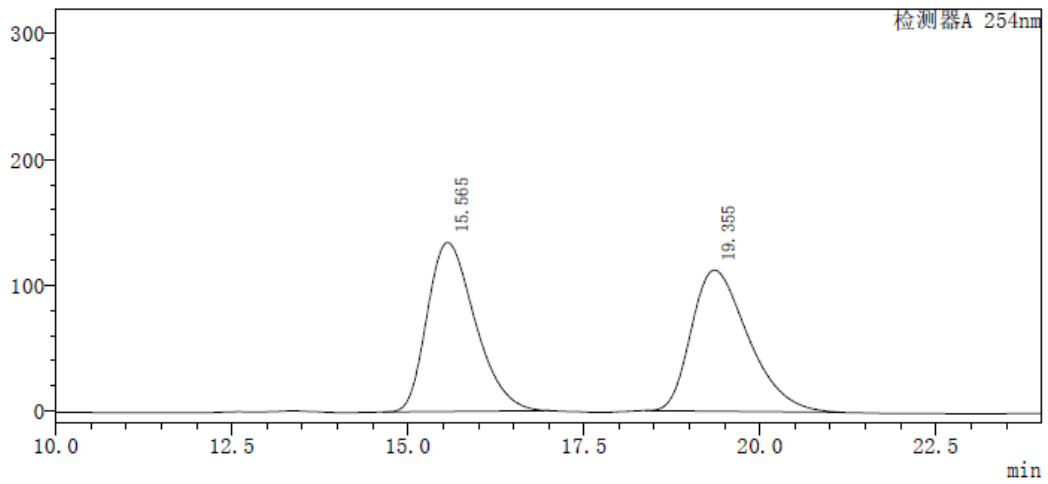

<峰表>

检测器A 254nm

| 峰号 | 保留时间   | 面积       | 高度     | 浓度     | 面积%     |
|----|--------|----------|--------|--------|---------|
| 1  | 15.565 | 6370454  | 134423 | 50.204 | 50.204  |
| 2  | 19.355 | 6318612  | 112200 | 49.796 | 49.796  |
| 总计 |        | 12689067 | 246624 |        | 100.000 |

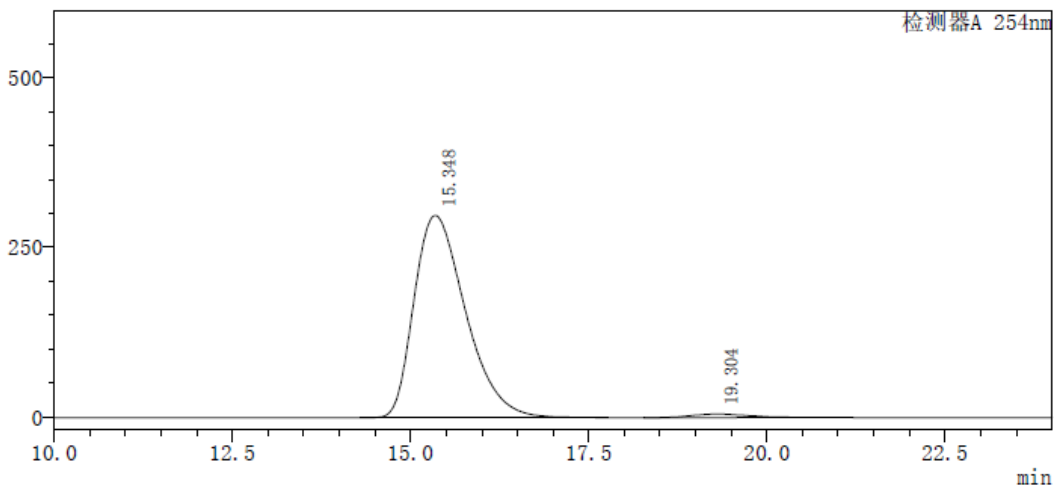

<峰表>

检测器A 254nm

| 峰号 | 保留时间   | 面积       | 高度     | 浓度     | 面积%     |
|----|--------|----------|--------|--------|---------|
| 1  | 15.348 | 15033062 | 298626 | 98.074 | 98.074  |
| 2  | 19.304 | 295265   | 5208   | 1.926  | 1.926   |
| 总计 |        | 15328327 | 303834 |        | 100.000 |

2p: OZH, *i*-PrOH/hexane = 20/80,  $v = 1.0$  mL/min,  $\lambda = 254$  nm

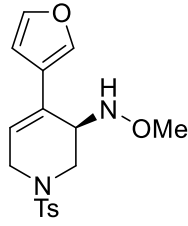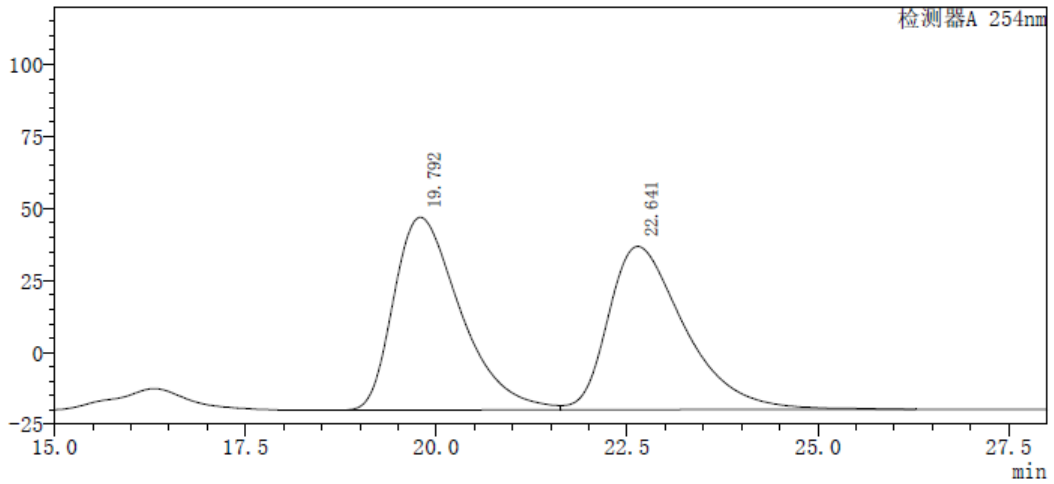

<峰表>

检测器A 254nm

| 峰号 | 保留时间   | 面积      | 高度     | 浓度     | 面积%     |
|----|--------|---------|--------|--------|---------|
| 1  | 19.792 | 4090974 | 66930  | 50.846 | 50.846  |
| 2  | 22.641 | 3954827 | 56677  | 49.154 | 49.154  |
| 总计 |        | 8045800 | 123607 |        | 100.000 |

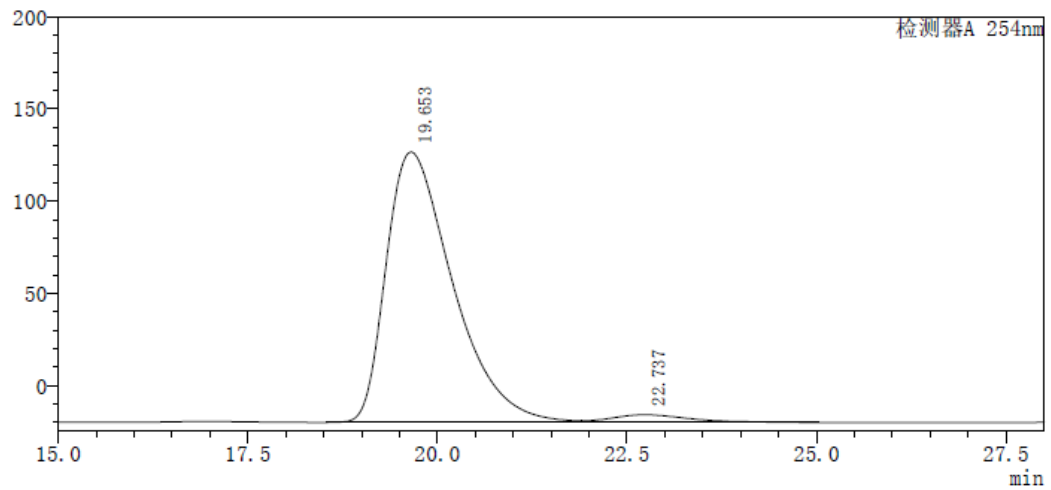

<峰表>

检测器A 254nm

| 峰号 | 保留时间   | 面积      | 高度     | 浓度     | 面积%     |
|----|--------|---------|--------|--------|---------|
| 1  | 19.653 | 8955223 | 146517 | 96.834 | 96.834  |
| 2  | 22.737 | 292780  | 4150   | 3.166  | 3.166   |
| 总计 |        | 9248002 | 150668 |        | 100.000 |

2q: OZH, *i*-PrOH/hexane = 20/80,  $v = 1.0$  mL/min,  $\lambda = 254$  nm

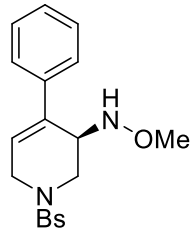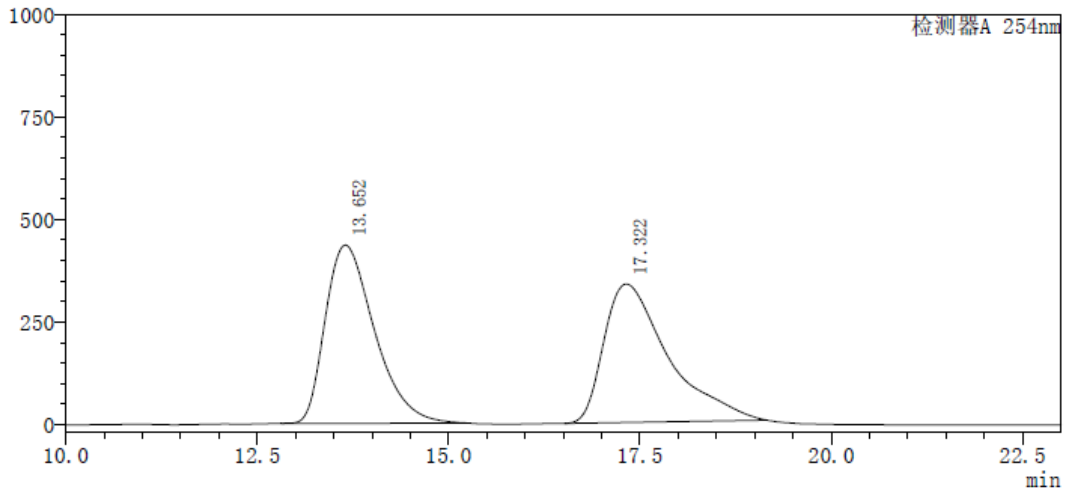

<峰表>

检测器A 254nm

| 峰号 | 保留时间   | 面积       | 高度     | 浓度     | 面积%     |
|----|--------|----------|--------|--------|---------|
| 1  | 13.652 | 19444945 | 434063 | 49.710 | 49.710  |
| 2  | 17.322 | 19671522 | 337209 | 50.290 | 50.290  |
| 总计 |        | 39116467 | 771272 |        | 100.000 |

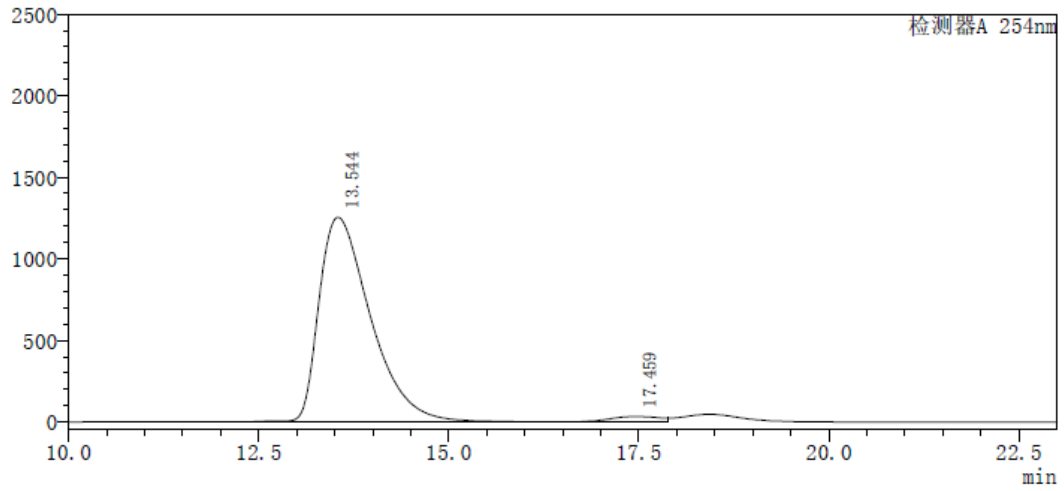

<峰表>

检测器A 254nm

| 峰号 | 保留时间   | 面积       | 高度      | 浓度     | 面积%     |
|----|--------|----------|---------|--------|---------|
| 1  | 13.544 | 58974242 | 1253560 | 97.567 | 97.567  |
| 2  | 17.459 | 1470643  | 32717   | 2.433  | 2.433   |
| 总计 |        | 60444885 | 1286277 |        | 100.000 |

2r: OZH, *i*-PrOH/hexane = 30/70,  $v = 1.0$  mL/min,  $\lambda = 254$  nm

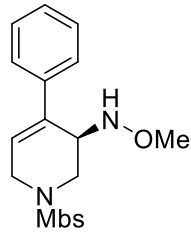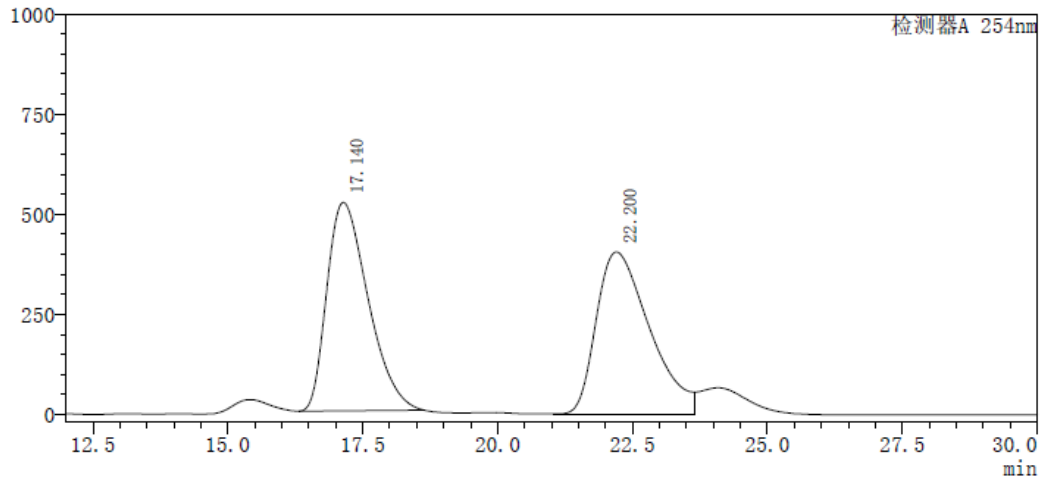

<峰表>

检测器A 254nm

| 峰号 | 保留时间   | 面积       | 高度     | 浓度     | 面积%     |
|----|--------|----------|--------|--------|---------|
| 1  | 17.140 | 27641132 | 520008 | 49.589 | 49.589  |
| 2  | 22.200 | 28099517 | 406697 | 50.411 | 50.411  |
| 总计 |        | 55740649 | 926705 |        | 100.000 |

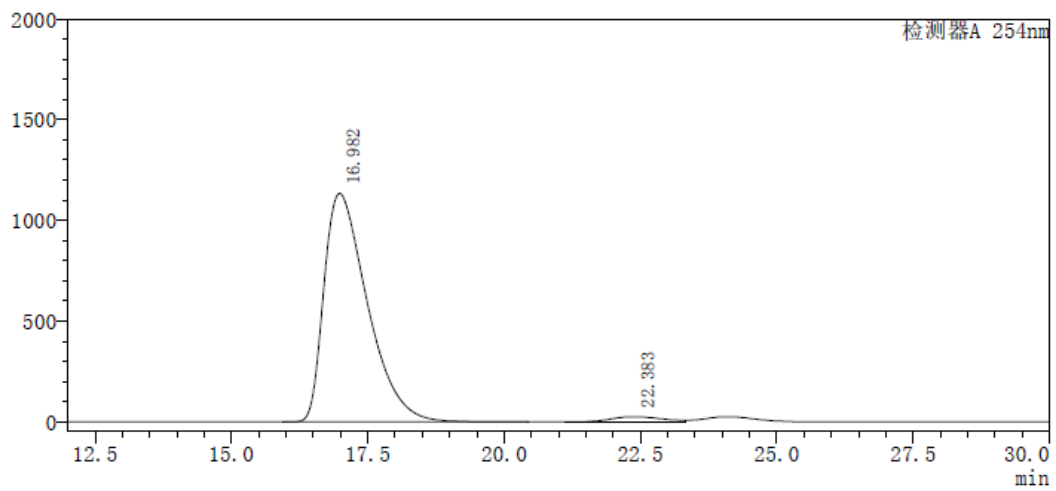

<峰表>

检测器A 254nm

| 峰号 | 保留时间   | 面积       | 高度      | 浓度     | 面积%     |
|----|--------|----------|---------|--------|---------|
| 1  | 16.982 | 62780085 | 1134023 | 97.449 | 97.449  |
| 2  | 22.383 | 1643516  | 25656   | 2.551  | 2.551   |
| 总计 |        | 64423602 | 1159679 |        | 100.000 |

2s: OZH, *i*-PrOH/hexane = 20/80,  $v = 1.0$  mL/min,  $\lambda = 254$  nm

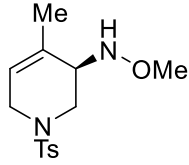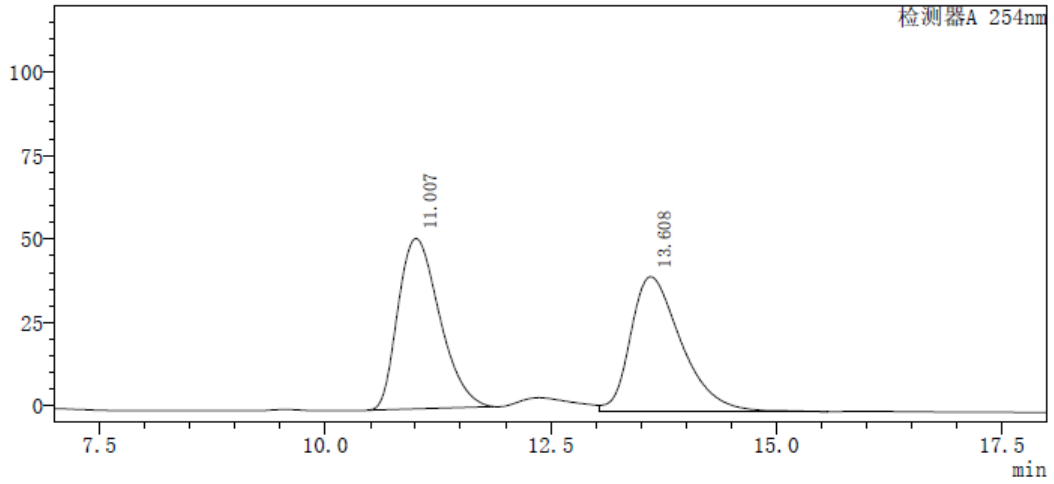

<峰表>

检测器A 254nm

| 峰号 | 保留时间   | 面积      | 高度    | 浓度     | 面积%     |
|----|--------|---------|-------|--------|---------|
| 1  | 11.007 | 1638260 | 50973 | 50.961 | 50.961  |
| 2  | 13.608 | 1576450 | 40277 | 49.039 | 49.039  |
| 总计 |        | 3214710 | 91250 |        | 100.000 |

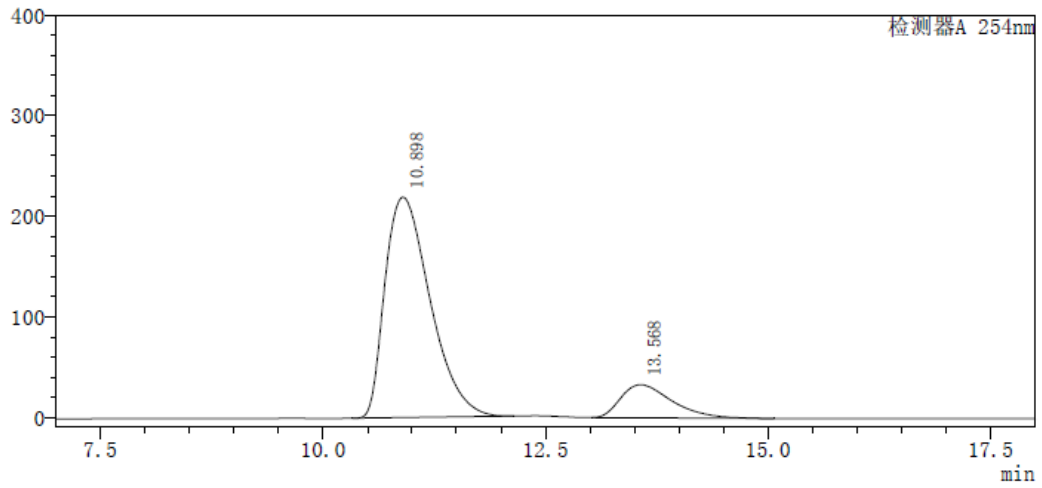

<峰表>

检测器A 254nm

| 峰号 | 保留时间   | 面积      | 高度     | 浓度     | 面积%     |
|----|--------|---------|--------|--------|---------|
| 1  | 10.898 | 7738061 | 219064 | 85.413 | 85.413  |
| 2  | 13.568 | 1321476 | 32938  | 14.587 | 14.587  |
| 总计 |        | 9059537 | 252003 |        | 100.000 |

2t: OZH, *i*-PrOH/hexane = 20/80,  $v = 1.0$  mL/min,  $\lambda = 254$  nm

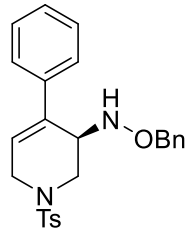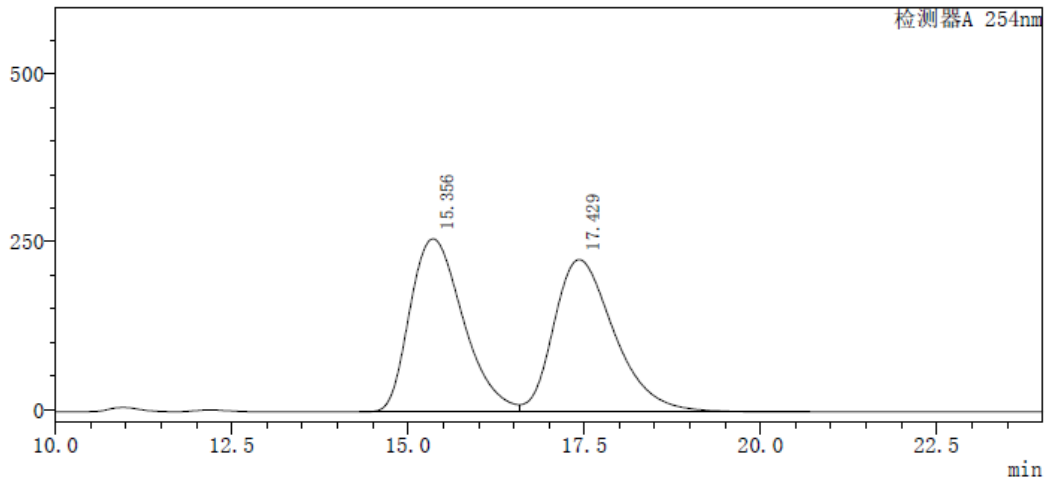

<峰表>

检测器A 254nm

| 峰号 | 保留时间   | 面积       | 高度     | 浓度     | 面积%     |
|----|--------|----------|--------|--------|---------|
| 1  | 15.356 | 13606897 | 258144 | 50.010 | 50.010  |
| 2  | 17.429 | 13601253 | 227110 | 49.990 | 49.990  |
| 总计 |        | 27208150 | 485255 |        | 100.000 |

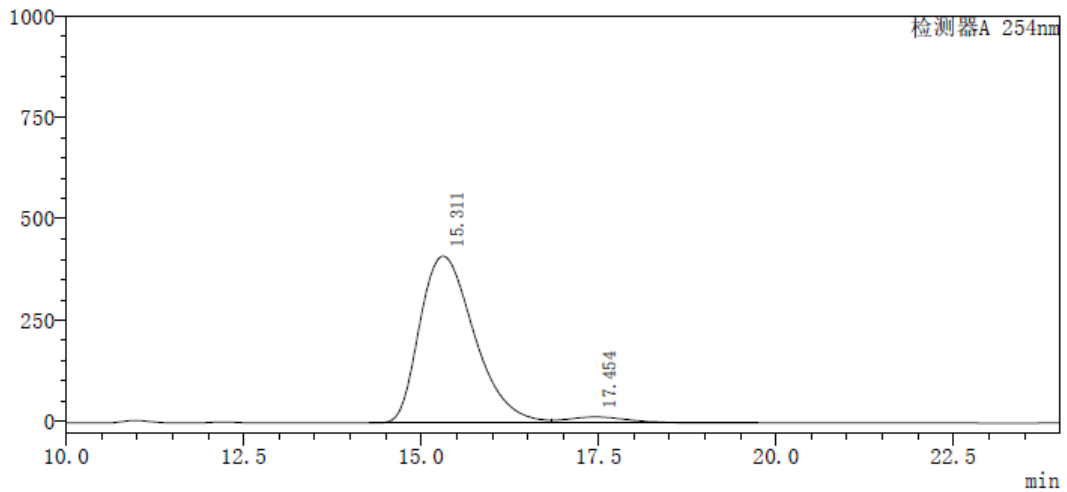

<峰表>

检测器A 254nm

| 峰号 | 保留时间   | 面积       | 高度     | 浓度     | 面积%     |
|----|--------|----------|--------|--------|---------|
| 1  | 15.311 | 22078706 | 410926 | 95.990 | 95.990  |
| 2  | 17.454 | 922298   | 15067  | 4.010  | 4.010   |
| 总计 |        | 23001004 | 425993 |        | 100.000 |

**2u:** OZH, *i*-PrOH/hexane = 20/80,  $v = 1.0$  mL/min,  $\lambda = 254$  nm

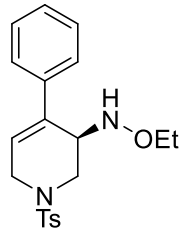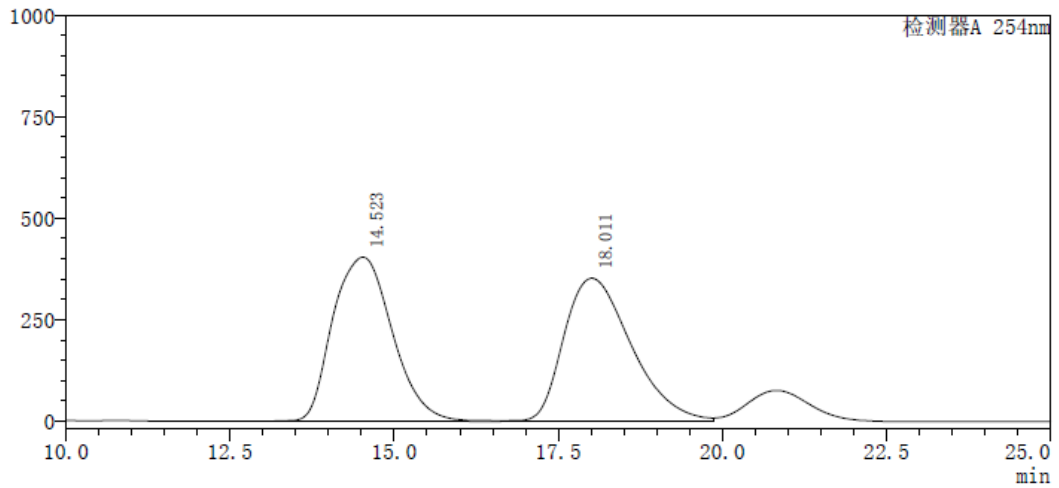

<峰表>

检测器A 254nm

| 峰号 | 保留时间   | 面积       | 高度     | 浓度     | 面积%     |
|----|--------|----------|--------|--------|---------|
| 1  | 14.523 | 25559707 | 404039 | 50.333 | 50.333  |
| 2  | 18.011 | 25221766 | 352257 | 49.667 | 49.667  |
| 总计 |        | 50781472 | 756296 |        | 100.000 |

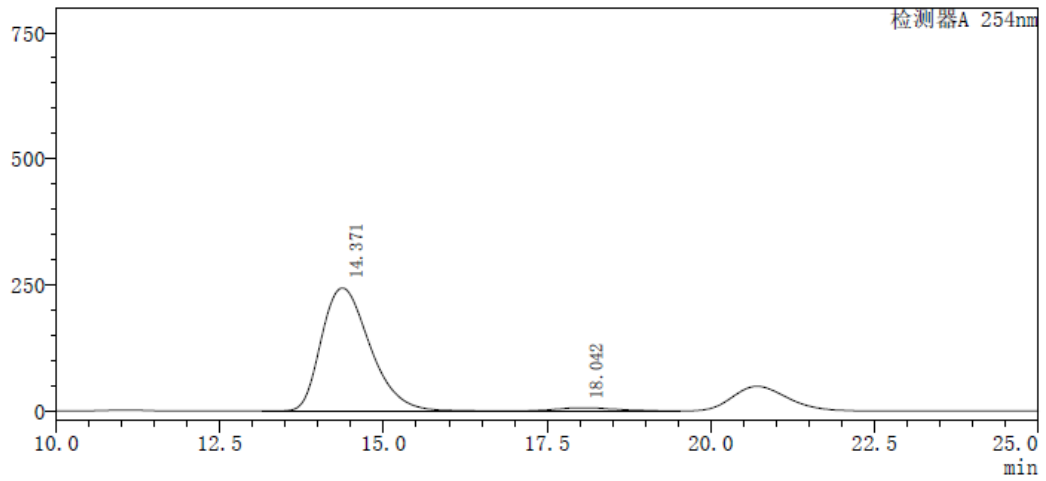

<峰表>

检测器A 254nm

| 峰号 | 保留时间   | 面积       | 高度     | 浓度     | 面积%     |
|----|--------|----------|--------|--------|---------|
| 1  | 14.371 | 12649085 | 243853 | 96.934 | 96.934  |
| 2  | 18.042 | 400053   | 6275   | 3.066  | 3.066   |
| 总计 |        | 13049139 | 250128 |        | 100.000 |

2v: OZH, *i*-PrOH/hexane = 10/90,  $v = 1.0$  mL/min,  $\lambda = 254$  nm

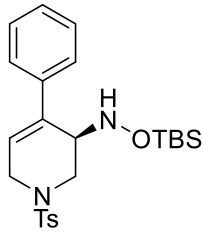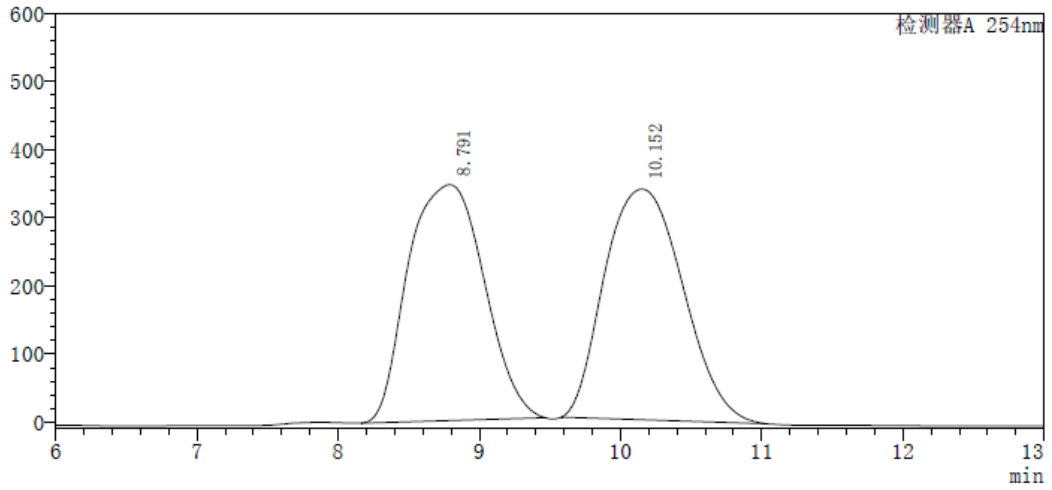

<峰表>

检测器A 254nm

| 峰号 | 保留时间   | 面积       | 高度     | 浓度     | 面积%     |
|----|--------|----------|--------|--------|---------|
| 1  | 8.791  | 12991047 | 345864 | 49.762 | 49.762  |
| 2  | 10.152 | 13115157 | 338149 | 50.238 | 50.238  |
| 总计 |        | 26106203 | 684013 |        | 100.000 |

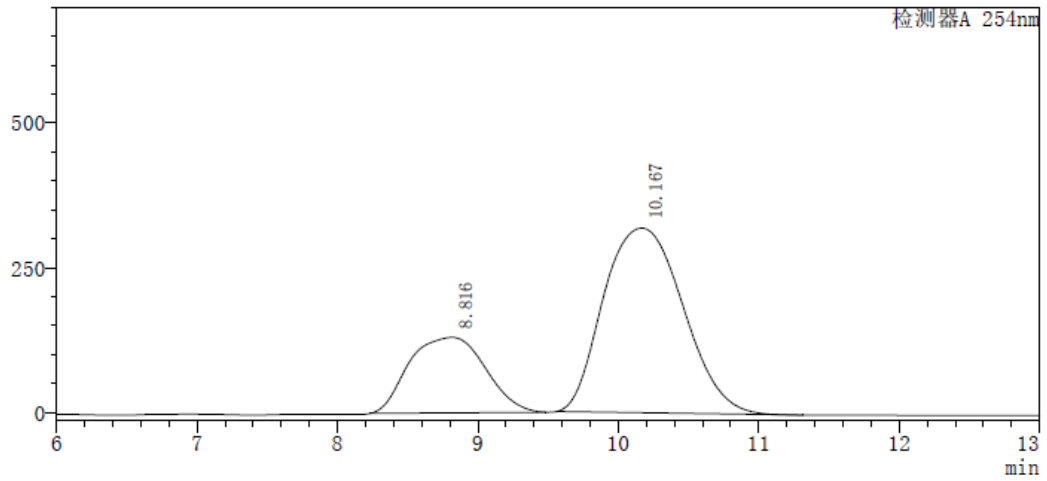

<峰表>

检测器A 254nm

| 峰号 | 保留时间   | 面积       | 高度     | 浓度     | 面积%     |
|----|--------|----------|--------|--------|---------|
| 1  | 8.816  | 4917678  | 130343 | 28.084 | 28.084  |
| 2  | 10.167 | 12592796 | 318681 | 71.916 | 71.916  |
| 总计 |        | 17510474 | 449024 |        | 100.000 |

4a: ASH, *i*-PrOH/hexane = 10/90,  $v = 1.0$  mL/min,  $\lambda = 254$  nm

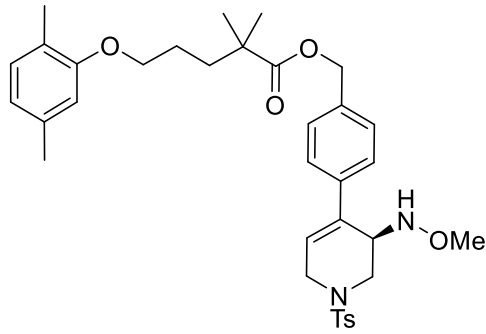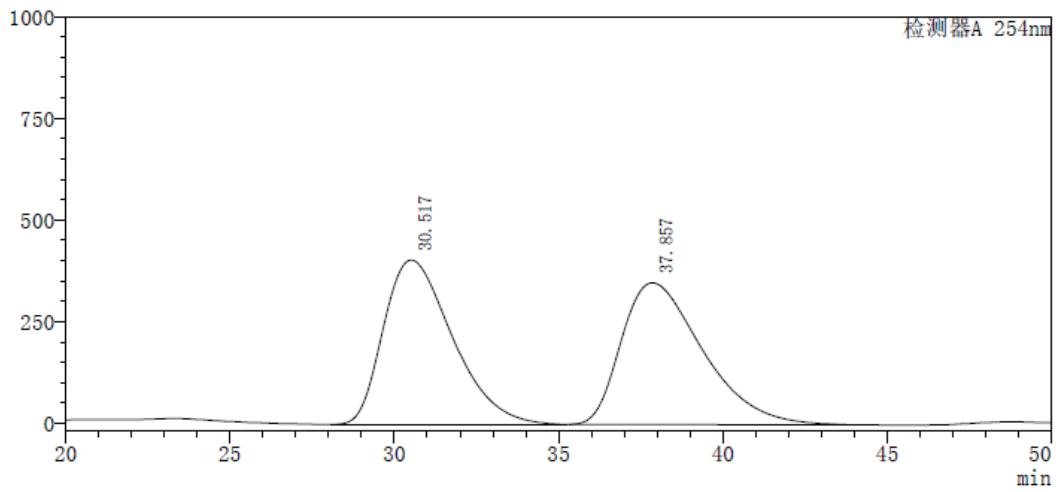

<峰表>

检测器A 254nm

| 峰号 | 保留时间   | 面积        | 高度     | 浓度     | 面积%     |
|----|--------|-----------|--------|--------|---------|
| 1  | 30.517 | 58969731  | 404011 | 49.601 | 49.601  |
| 2  | 37.857 | 59917526  | 348210 | 50.399 | 50.399  |
| 总计 |        | 118887257 | 752221 |        | 100.000 |

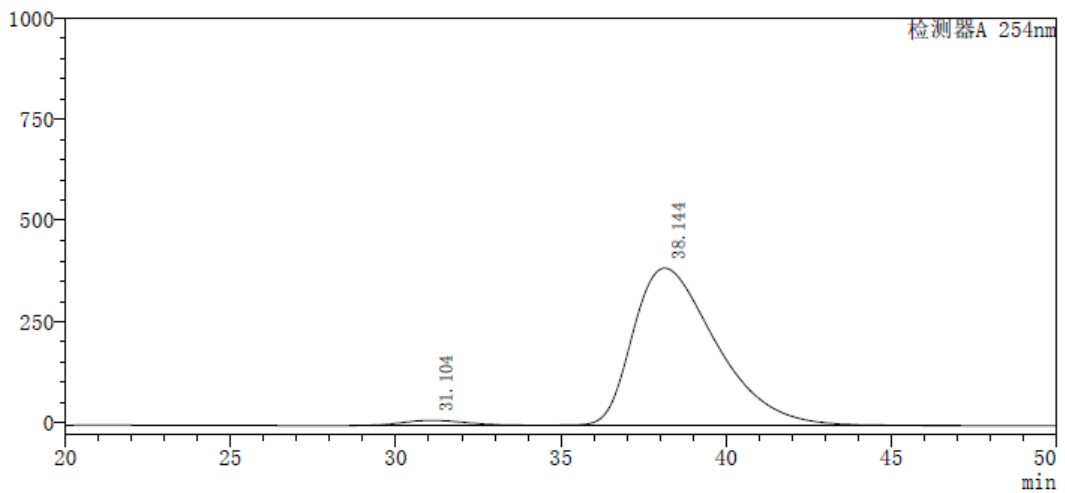

<峰表>

检测器A 254nm

| 峰号 | 保留时间   | 面积       | 高度     | 浓度     | 面积%     |
|----|--------|----------|--------|--------|---------|
| 1  | 31.104 | 1818185  | 12963  | 2.592  | 2.592   |
| 2  | 38.144 | 68330090 | 388398 | 97.408 | 97.408  |
| 总计 |        | 70148275 | 401361 |        | 100.000 |

**4b:** OZH, *i*-PrOH/hexane = 50/50,  $v = 1.0$  mL/min,  $\lambda = 254$  nm

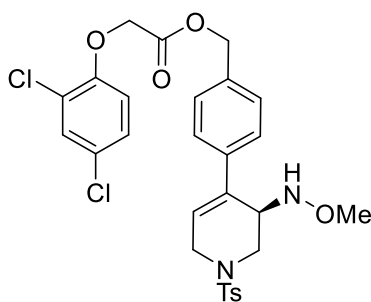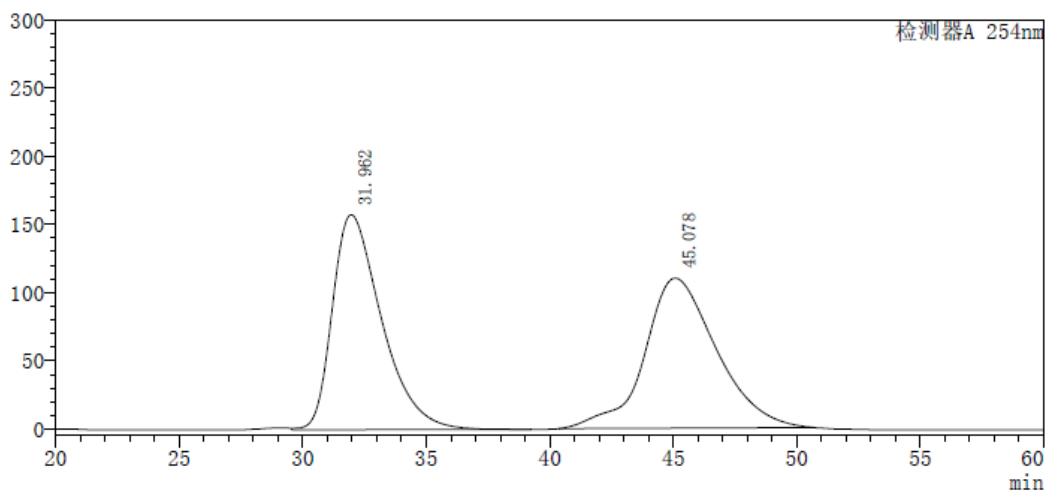

<峰表>

检测器A 254nm

| 峰号 | 保留时间   | 面积       | 高度     | 浓度     | 面积%     |
|----|--------|----------|--------|--------|---------|
| 1  | 31.962 | 21851082 | 157539 | 49.552 | 49.552  |
| 2  | 45.078 | 22245872 | 109841 | 50.448 | 50.448  |
| 总计 |        | 44096954 | 267380 |        | 100.000 |

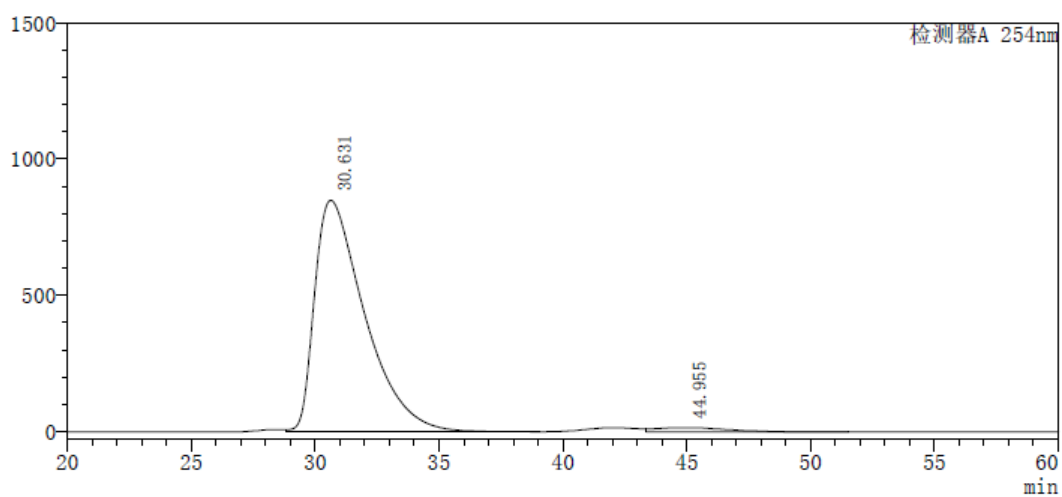

<峰表>

检测器A 254nm

| 峰号 | 保留时间   | 面积        | 高度     | 浓度     | 面积%     |
|----|--------|-----------|--------|--------|---------|
| 1  | 30.631 | 119655241 | 849177 | 97.516 | 97.516  |
| 2  | 44.955 | 3048338   | 15529  | 2.484  | 2.484   |
| 总计 |        | 122703578 | 864707 |        | 100.000 |

4c: ADH, *i*-PrOH/hexane = 50/50,  $v = 1.0$  mL/min,  $\lambda = 254$  nm

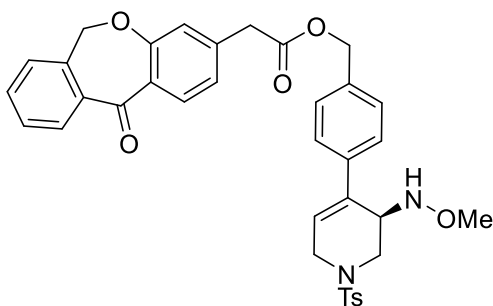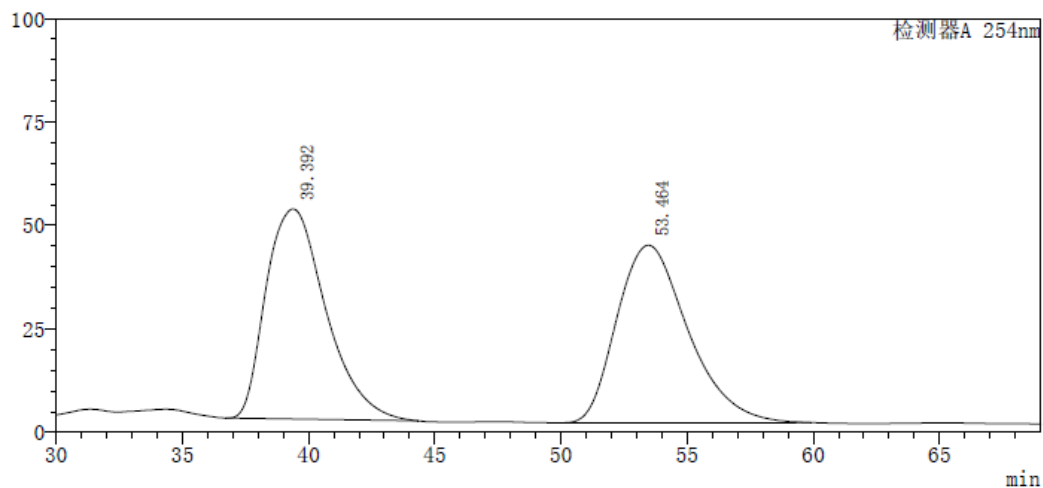

<峰表>

检测器A 254nm

| 峰号 | 保留时间   | 面积       | 高度    | 浓度     | 面积%     |
|----|--------|----------|-------|--------|---------|
| 1  | 39.392 | 8398926  | 50729 | 49.897 | 49.897  |
| 2  | 53.464 | 8433559  | 42902 | 50.103 | 50.103  |
| 总计 |        | 16832485 | 93631 |        | 100.000 |

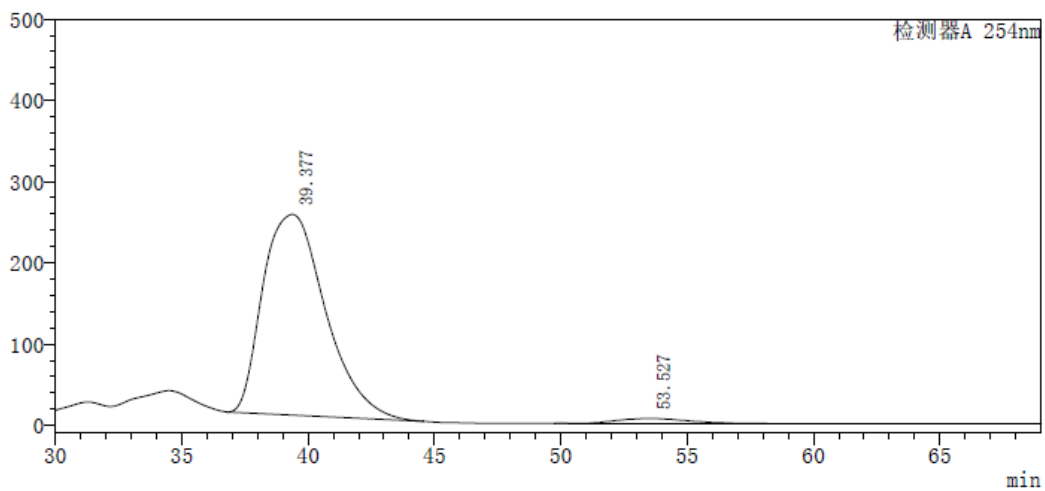

<峰表>

检测器A 254nm

| 峰号 | 保留时间   | 面积       | 高度     | 浓度     | 面积%     |
|----|--------|----------|--------|--------|---------|
| 1  | 39.377 | 42728501 | 246926 | 97.121 | 97.121  |
| 2  | 53.527 | 1266426  | 6287   | 2.879  | 2.879   |
| 总计 |        | 43994927 | 253213 |        | 100.000 |

**4d:** OZH, *i*-PrOH/hexane = 20/80,  $v = 1.0$  mL/min,  $\lambda = 254$  nm

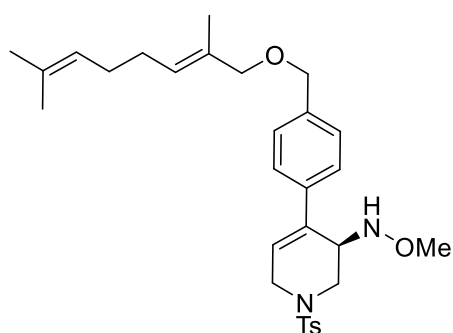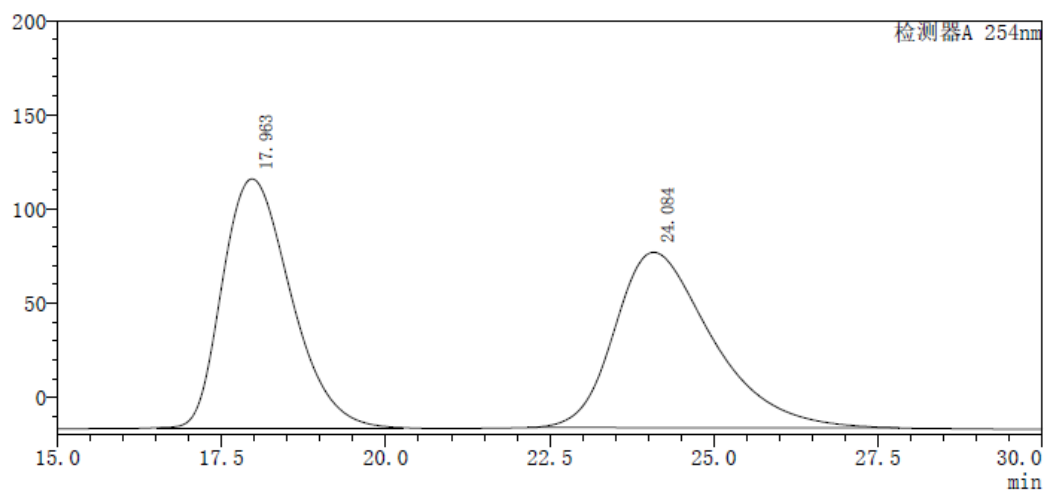

<峰表>

检测器A 254nm

| 峰号 | 保留时间   | 面积       | 高度     | 浓度     | 面积%     |
|----|--------|----------|--------|--------|---------|
| 1  | 17.963 | 9533805  | 131966 | 49.700 | 49.700  |
| 2  | 24.084 | 9649061  | 93051  | 50.300 | 50.300  |
| 总计 |        | 19182866 | 225017 |        | 100.000 |

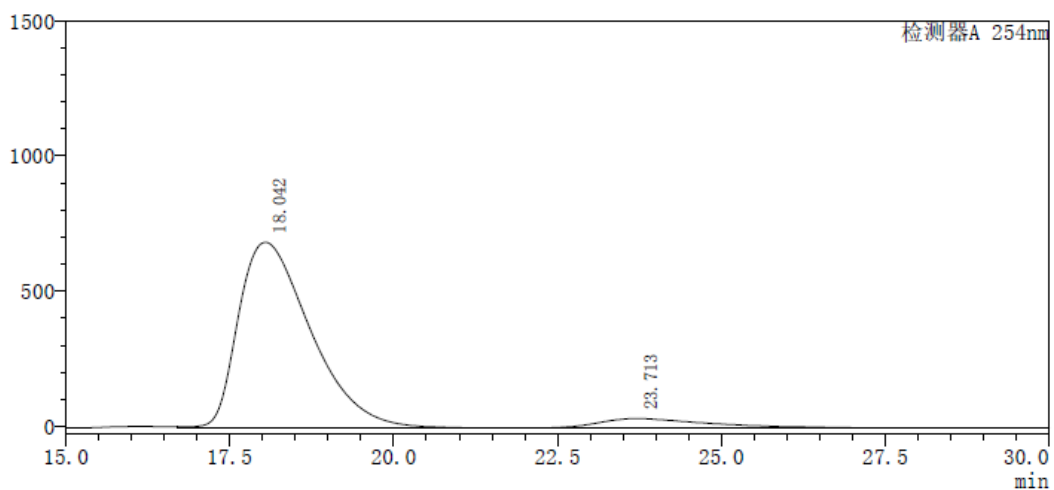

<峰表>

检测器A 254nm

| 峰号 | 保留时间   | 面积       | 高度     | 浓度     | 面积%     |
|----|--------|----------|--------|--------|---------|
| 1  | 18.042 | 52416460 | 685311 | 93.007 | 93.007  |
| 2  | 23.713 | 3941314  | 34073  | 6.993  | 6.993   |
| 总计 |        | 56357774 | 719384 |        | 100.000 |

## 8. NMR Spectra

| Parameter                | Value               |
|--------------------------|---------------------|
| 1 Title                  | qlj-7-120-H;        |
| 2 Origin                 | Bruker BioSpin GmbH |
| 3 Solvent                | CDC13               |
| 4 Temperature            | 297.9               |
| 5 Number of Scans        | 16                  |
| 6 Acquisition Time       | 3.9977              |
| 7 Acquisition Date       | 2024-03-18T16:17:21 |
| 8 Spectrometer Frequency | 400.25              |
| 9 Spectral Width         | 8196.7              |
| 10 Lowest Frequency      | -1636.4             |
| 11 Nucleus               | <sup>1</sup> H      |
| 12 Acquired Size         | 32768               |
| 13 Spectral Size         | 65536               |

7.941  
7.922  
7.919  
7.912  
7.893  
7.889  
7.831  
7.803  
7.782  
7.365  
7.360  
7.355  
7.351  
7.250  
6.886  
6.876  
6.865

4.509  
4.493  
4.276  
4.265  
4.109  
4.094  
3.872  
3.850

2.182  
2.157

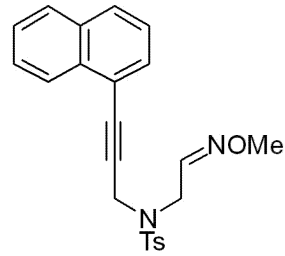

1n

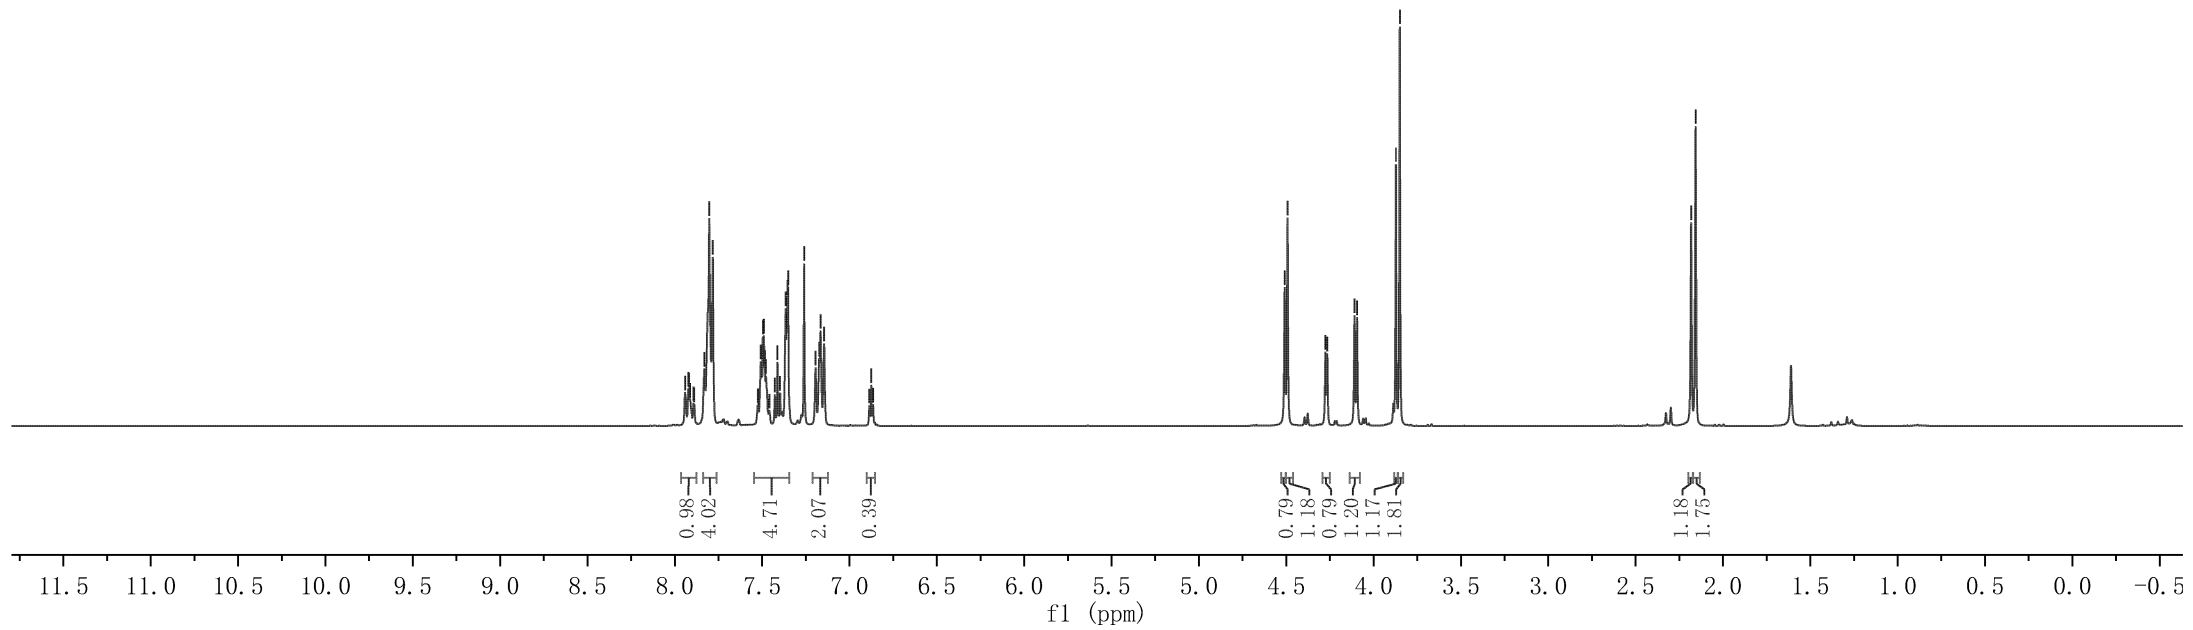

| Parameter                | Value               |
|--------------------------|---------------------|
| 1 Title                  | qlj-7-120-C         |
| 2 Origin                 | Bruker BioSpin GmbH |
| 3 Solvent                | CDC13               |
| 4 Temperature            | 298.9               |
| 5 Number of Scans        | 300                 |
| 6 Acquisition Time       | 1.3763              |
| 7 Acquisition Date       | 2024-03-18T12:01:54 |
| 8 Spectrometer Frequency | 100.64              |
| 9 Spectral Width         | 23809.5             |
| 10 Lowest Frequency      | -1848.8             |
| 11 Nucleus               | <sup>13</sup> C     |
| 12 Acquired Size         | 32768               |
| 13 Spectral Size         | 32768               |

147.20  
144.93  
143.96  
143.89

130.64  
129.69  
129.62  
127.66  
126.67  
126.35  
124.99  
119.73  
119.62

86.27  
86.08  
84.21

77.32  
77.00  
76.68

62.16  
61.85

45.88  
42.87  
39.32  
38.05

21.27  
21.24

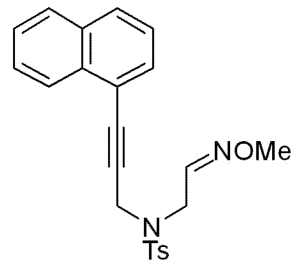

ln

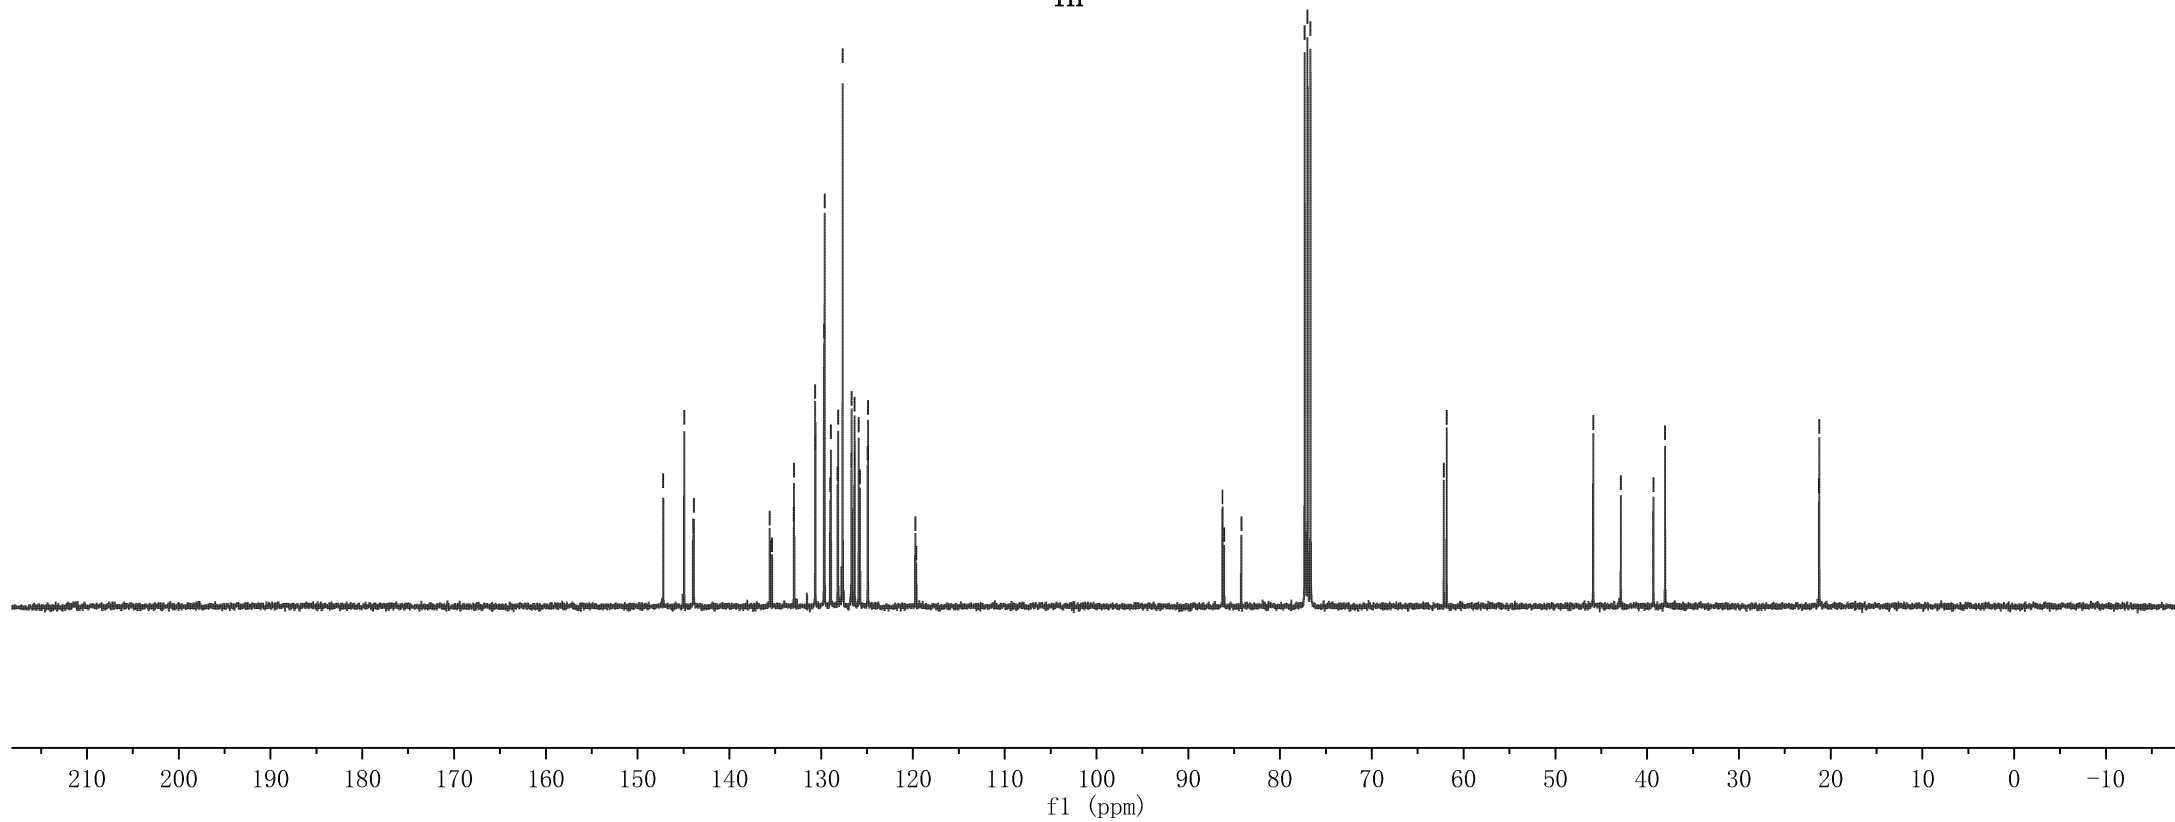

| Parameter                | Value               |
|--------------------------|---------------------|
| 1 Title                  | qlj-11-40-H         |
| 2 Origin                 | Bruker BioSpin GmbH |
| 3 Solvent                | CDC13               |
| 4 Temperature            | 295.3               |
| 5 Number of Scans        | 16                  |
| 6 Acquisition Time       | 3.9977              |
| 7 Acquisition Date       | 2025-06-19T08:43:57 |
| 8 Spectrometer Frequency | 400.25              |
| 9 Spectral Width         | 8196.7              |
| 10 Lowest Frequency      | -1636.4             |
| 11 Nucleus               | <sup>1</sup> H      |
| 12 Acquired Size         | 32768               |
| 13 Spectral Size         | 65536               |

7.756  
7.736  
7.317  
7.300  
7.296  
7.279  
7.269  
6.780  
6.770  
6.187  
6.184  
6.183  
6.177  
6.174  
4.282  
4.264  
4.128  
4.118  
3.971  
3.957  
3.863  
3.817  
2.385  
2.374

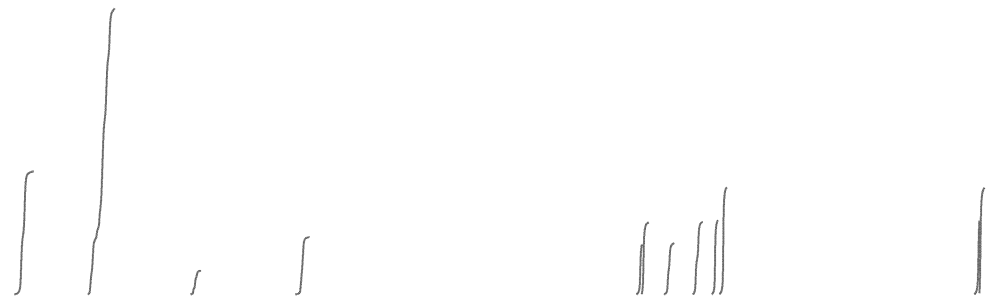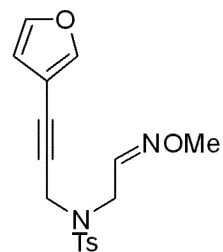

1p

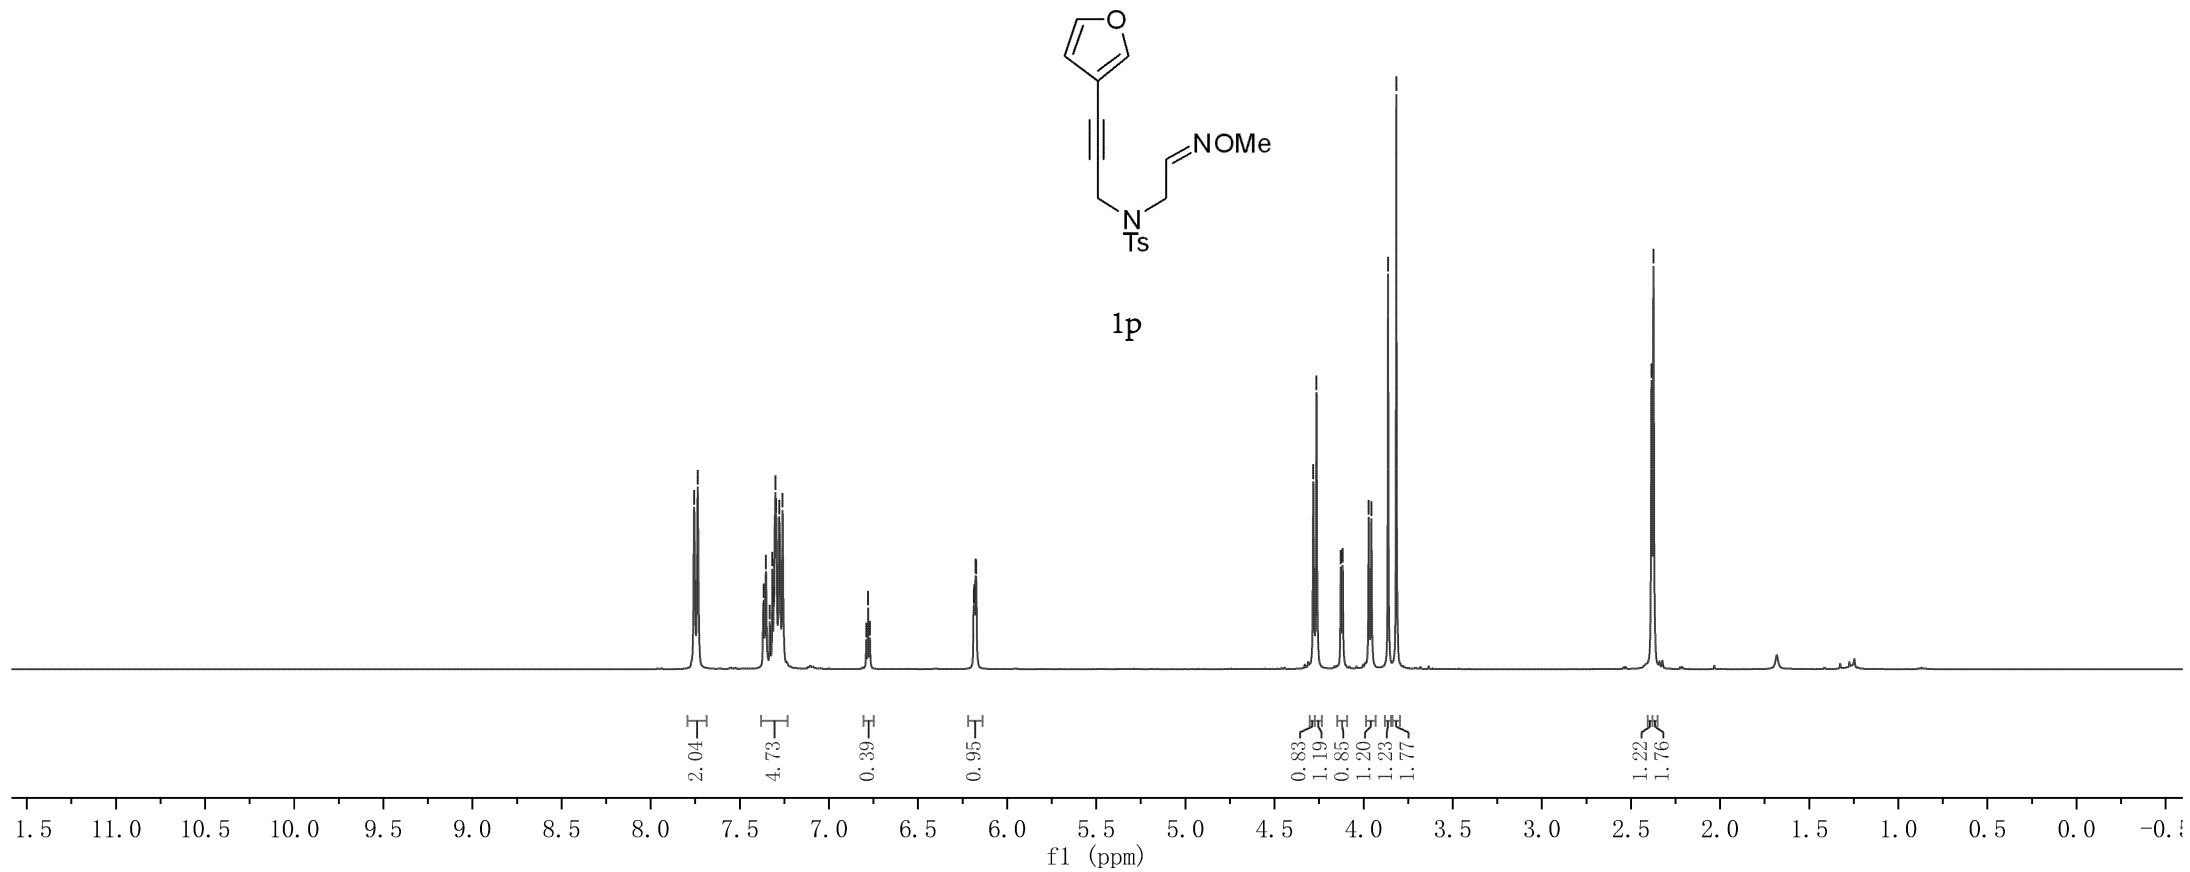

| Parameter                | Value               |
|--------------------------|---------------------|
| 1 Title                  | qlj-11-40-C         |
| 2 Origin                 | Bruker BioSpin GmbH |
| 3 Solvent                | CDC13               |
| 4 Temperature            | 296.1               |
| 5 Number of Scans        | 250                 |
| 6 Acquisition Time       | 1.3763              |
| 7 Acquisition Date       | 2025-06-19T08:58:39 |
| 8 Spectrometer Frequency | 100.64              |
| 9 Spectral Width         | 23809.5             |
| 10 Lowest Frequency      | -1848.4             |
| 11 Nucleus               | 13C                 |
| 12 Acquired Size         | 32768               |
| 13 Spectral Size         | 32768               |

147.37  
145.82  
145.80  
145.06  
143.84  
143.75  
142.68  
142.61  
135.68  
135.40  
129.62  
129.54  
127.74

112.22  
112.16  
106.48  
106.38

83.53  
83.30  
77.32  
77.17  
77.00  
76.68

62.11  
61.78

45.83  
43.01  
39.20  
37.85

21.44  
21.42

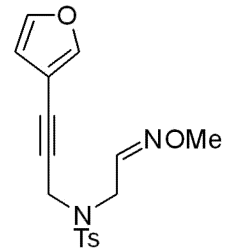

1p

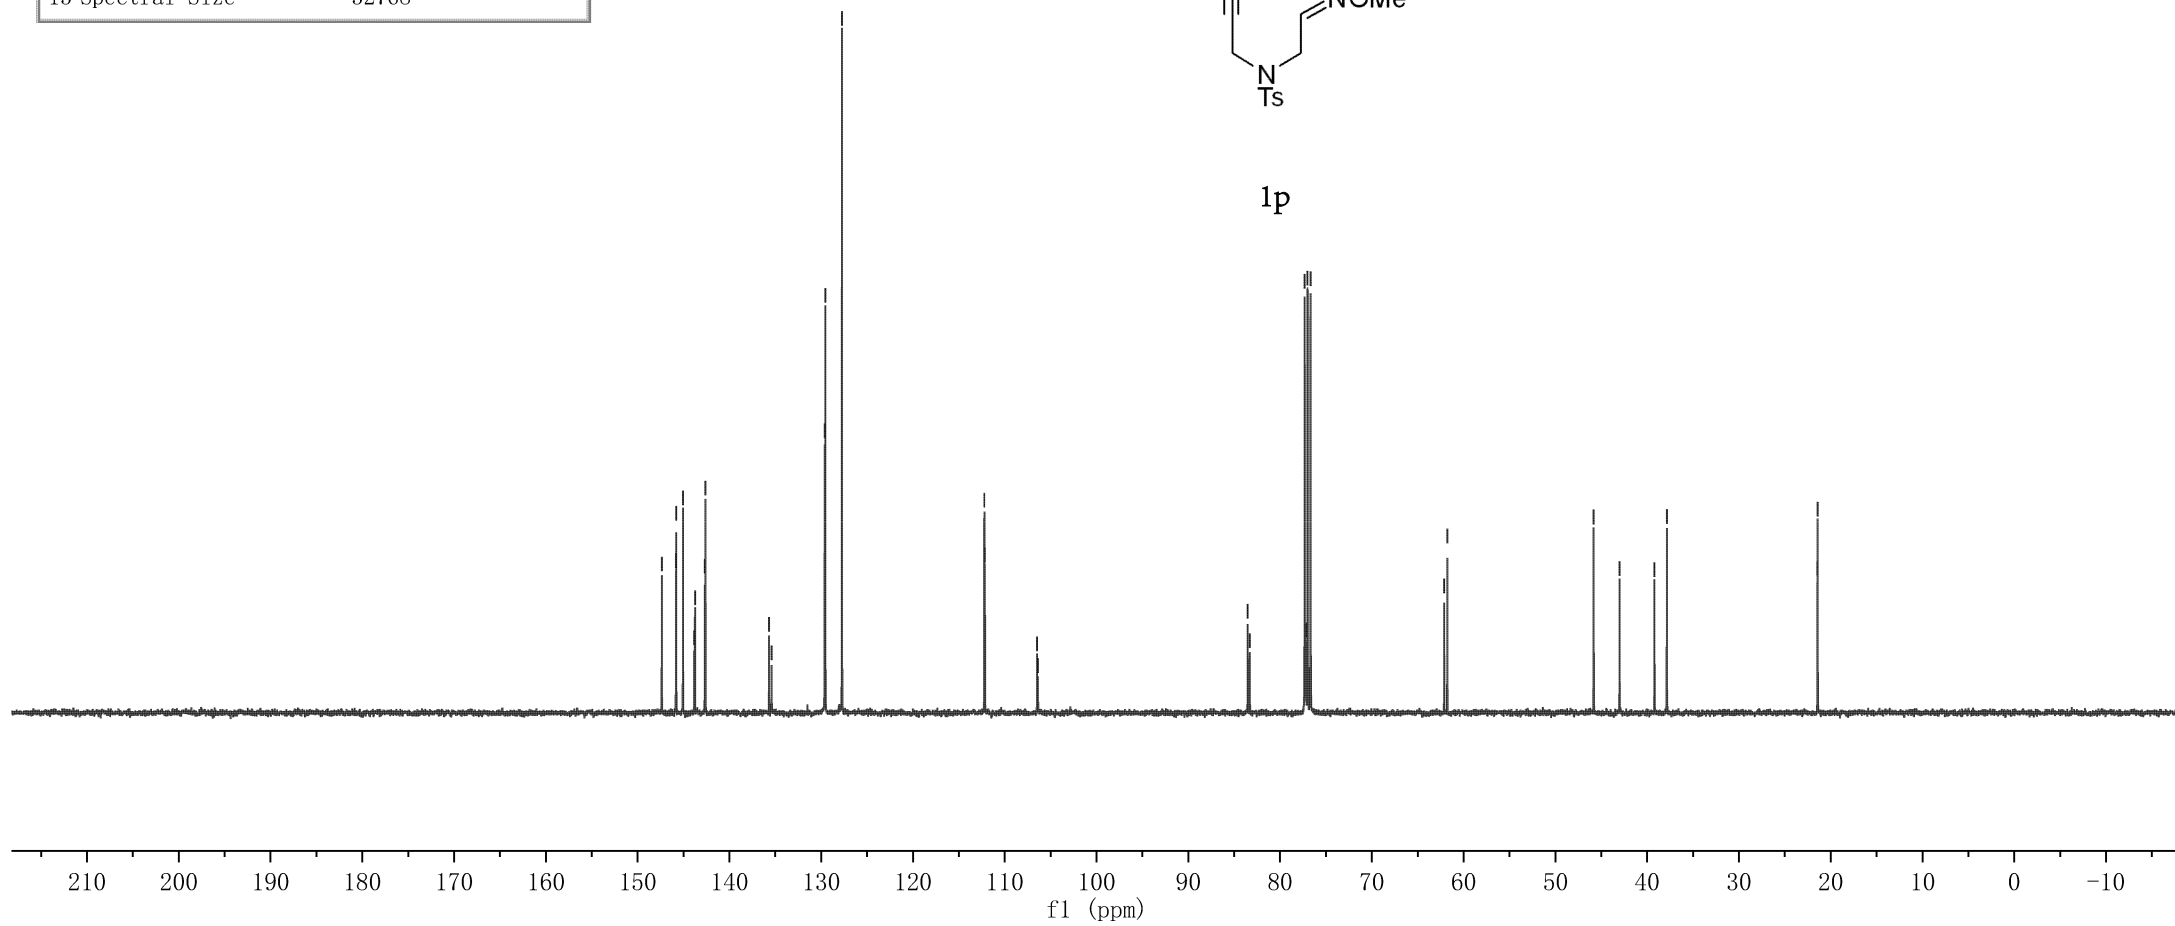

| Parameter                | Value               |
|--------------------------|---------------------|
| 1 Title                  | ysh-0220            |
| 2 Origin                 | Bruker BioSpin GmbH |
| 3 Solvent                | CDC13               |
| 4 Temperature            | 293.0               |
| 5 Number of Scans        | 16                  |
| 6 Acquisition Time       | 4.0894              |
| 7 Acquisition Date       | 2023-02-07T11:08:00 |
| 8 Spectrometer Frequency | 400.13              |
| 9 Spectral Width         | 8012.8              |
| 10 Lowest Frequency      | -1548.9             |
| 11 Nucleus               | <sup>1</sup> H      |
| 12 Acquired Size         | 32768               |
| 13 Spectral Size         | 65536               |

7.646  
7.637  
7.626  
7.617  
7.251  
7.229  
7.210  
7.196  
7.181  
6.674  
6.664  
6.654

3.979  
3.969  
3.950  
3.939  
3.935  
3.827  
3.813  
3.771  
3.714

2.323

1.482  
1.458

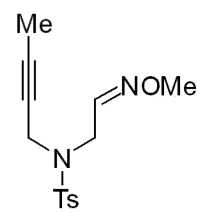

1s

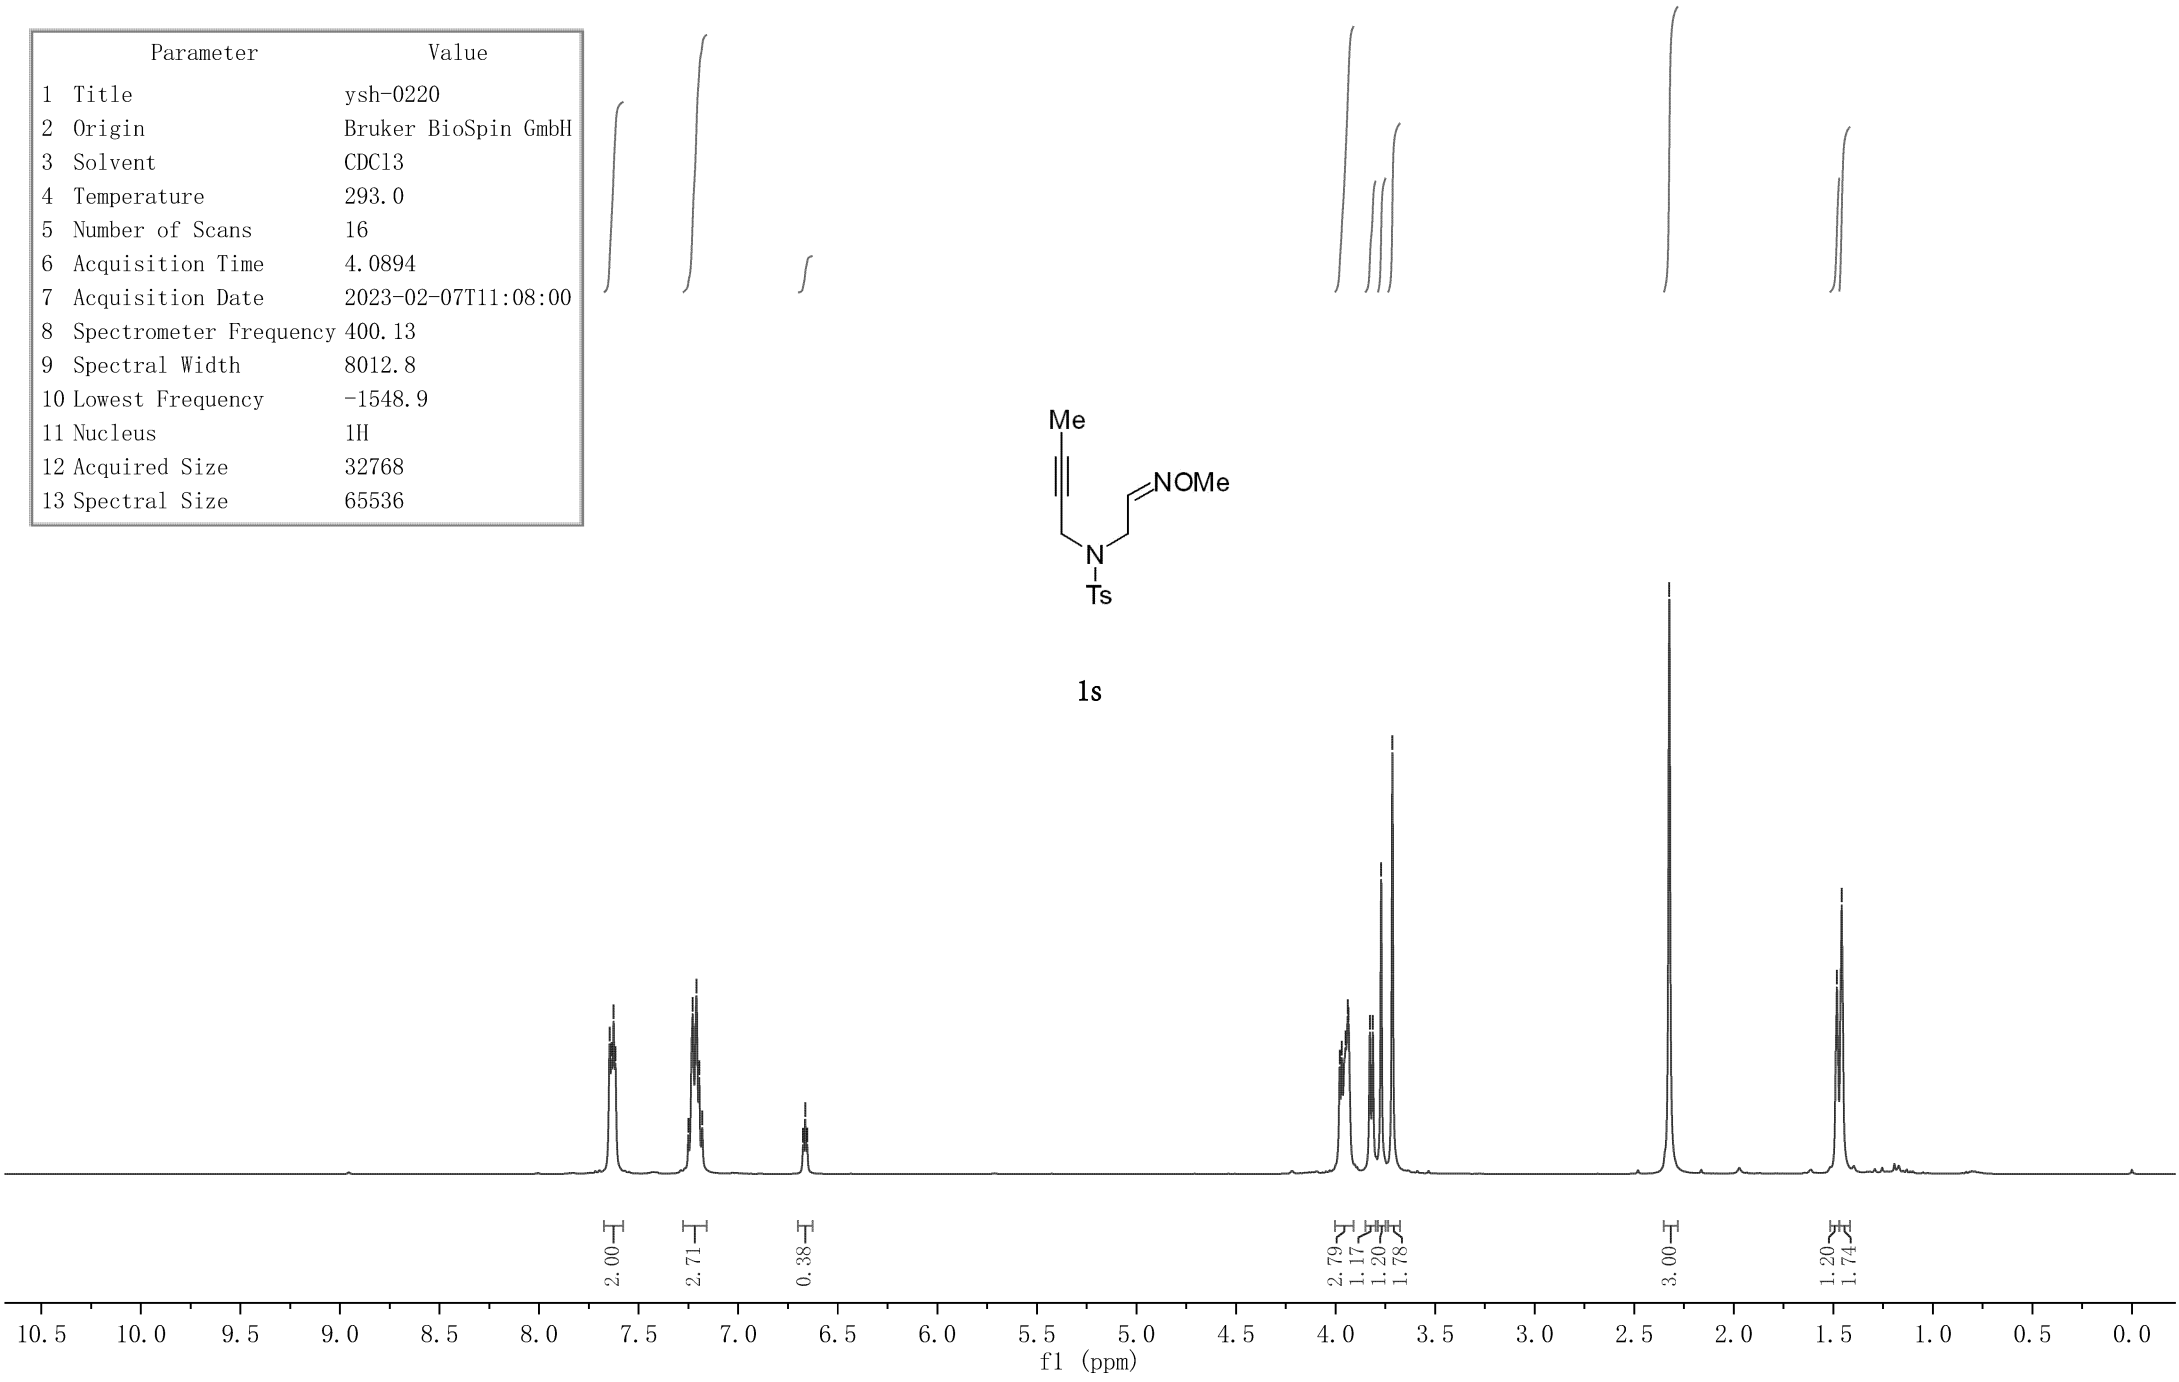

| Parameter                | Value               |
|--------------------------|---------------------|
| 1 Title                  | ysh-0220C           |
| 2 Origin                 | Bruker BioSpin GmbH |
| 3 Solvent                | CDC13               |
| 4 Temperature            | 293.5               |
| 5 Number of Scans        | 120                 |
| 6 Acquisition Time       | 1.3631              |
| 7 Acquisition Date       | 2023-02-07T11:06:00 |
| 8 Spectrometer Frequency | 100.61              |
| 9 Spectral Width         | 24038.5             |
| 10 Lowest Frequency      | -1987.2             |
| 11 Nucleus               | <sup>13</sup> C     |
| 12 Acquired Size         | 32768               |
| 13 Spectral Size         | 65536               |

147.42  
144.92  
143.51  
143.40  
135.41  
135.09  
129.23  
129.13  
127.50  
127.45

82.01  
81.85  
77.32  
77.00  
76.68  
71.19  
71.14  
61.77  
61.42

45.24  
42.69  
38.63  
37.21

21.16

2.95

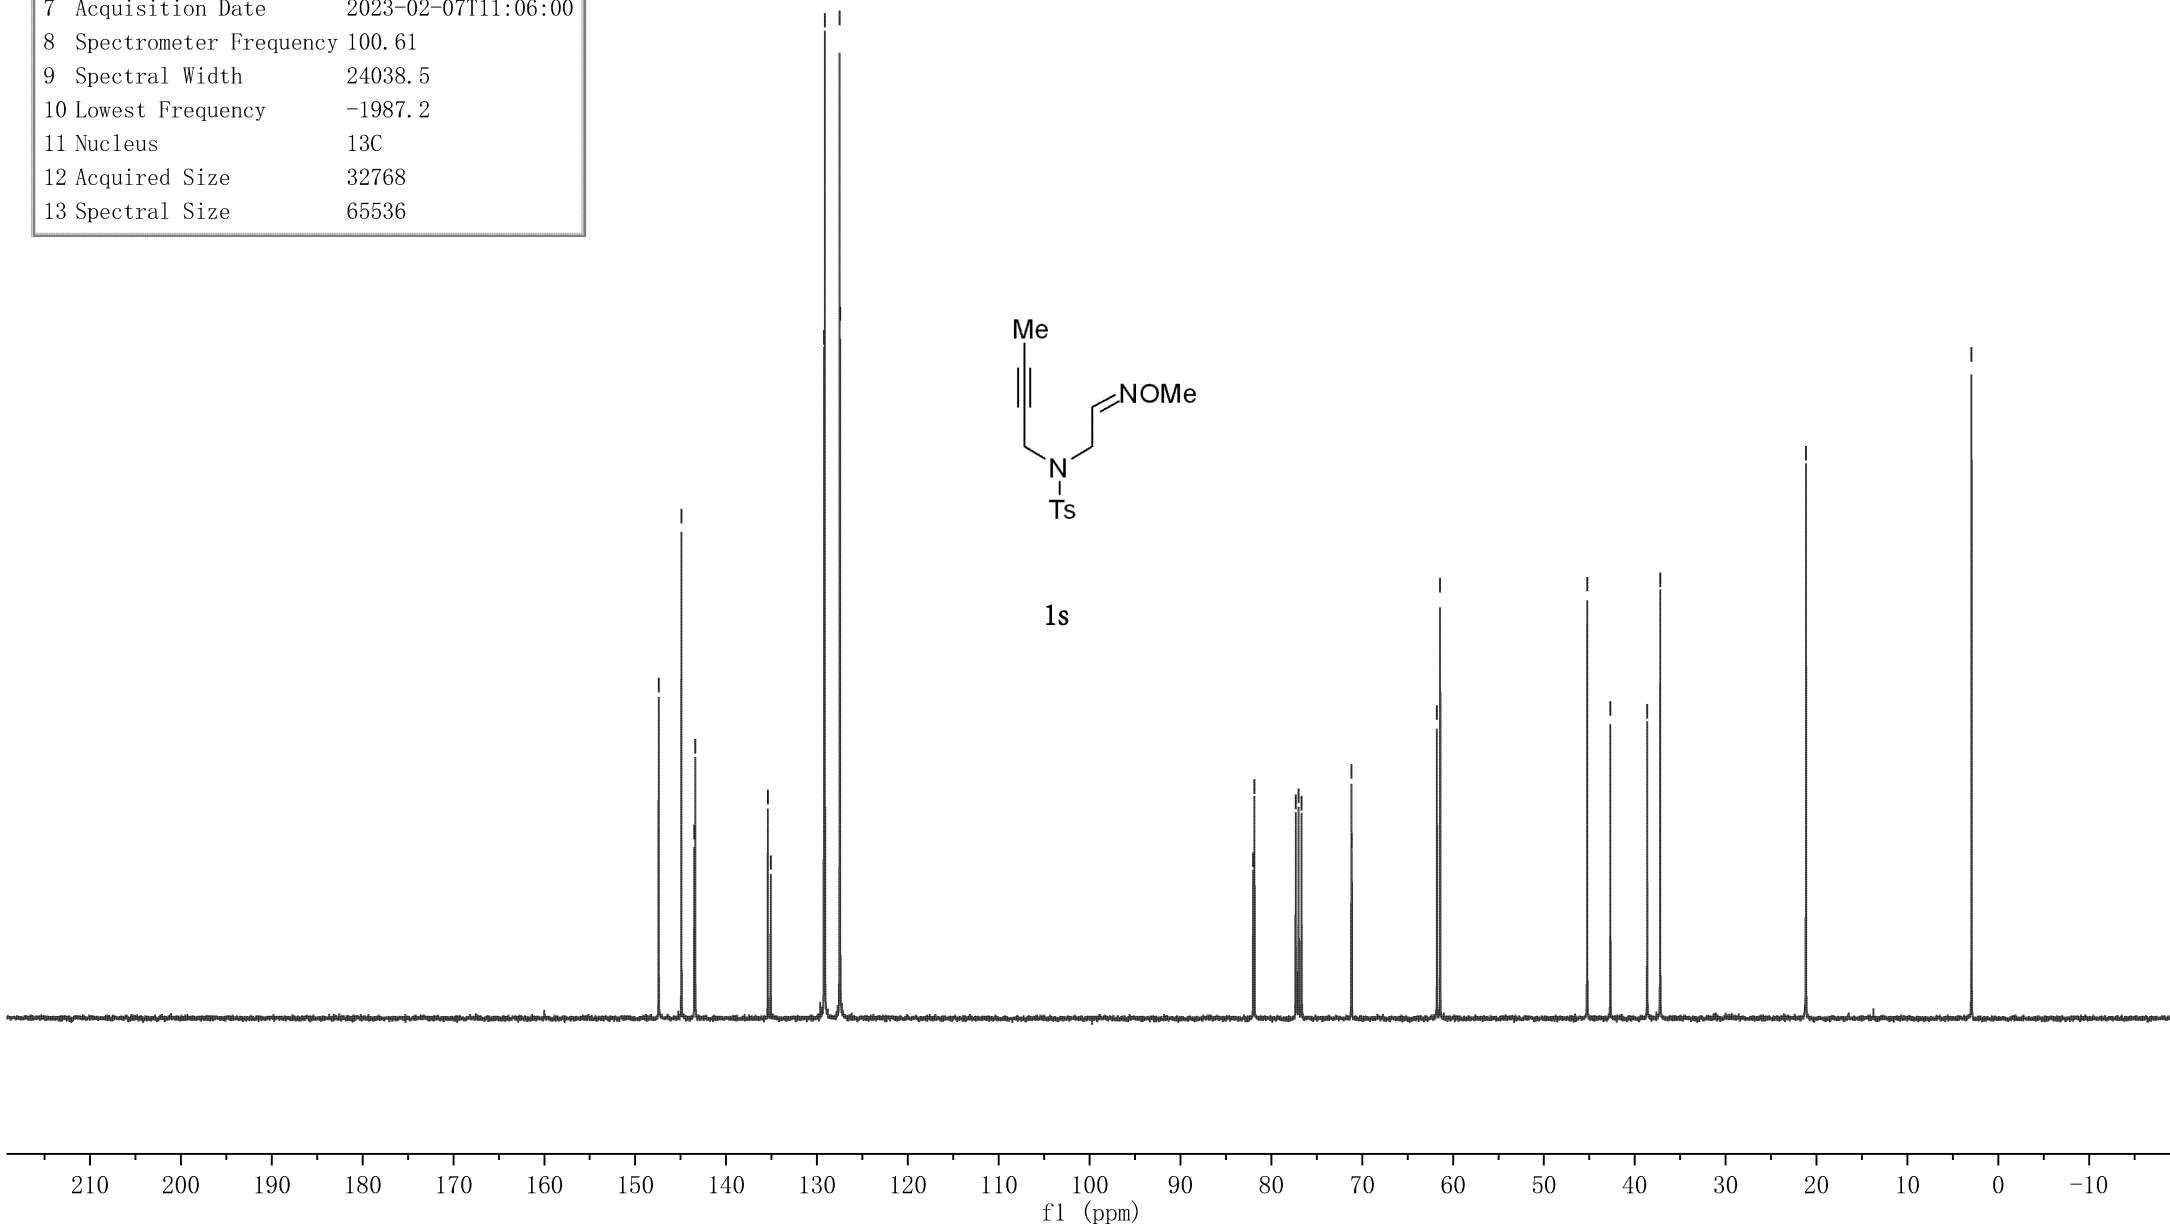

| Parameter                | Value               |
|--------------------------|---------------------|
| 1 Title                  | qlj-11-47-H         |
| 2 Origin                 | Bruker BioSpin GmbH |
| 3 Solvent                | CDC13               |
| 4 Temperature            | 295.3               |
| 5 Number of Scans        | 16                  |
| 6 Acquisition Time       | 3.9977              |
| 7 Acquisition Date       | 2025-06-27T08:50:28 |
| 8 Spectrometer Frequency | 400.25              |
| 9 Spectral Width         | 8196.7              |
| 10 Lowest Frequency      | -1626.8             |
| 11 Nucleus               | 1H                  |
| 12 Acquired Size         | 32768               |
| 13 Spectral Size         | 65536               |

7.798 7.777 7.461 7.368 7.359 7.347 7.341 7.336 7.334 7.329 7.322 7.290 7.284 7.279 7.272 7.270 7.259 7.146 7.143 7.139 5.142 5.096 4.354 4.299 4.273 4.262 4.055 4.040 2.371 2.360

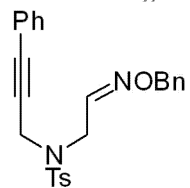

1t

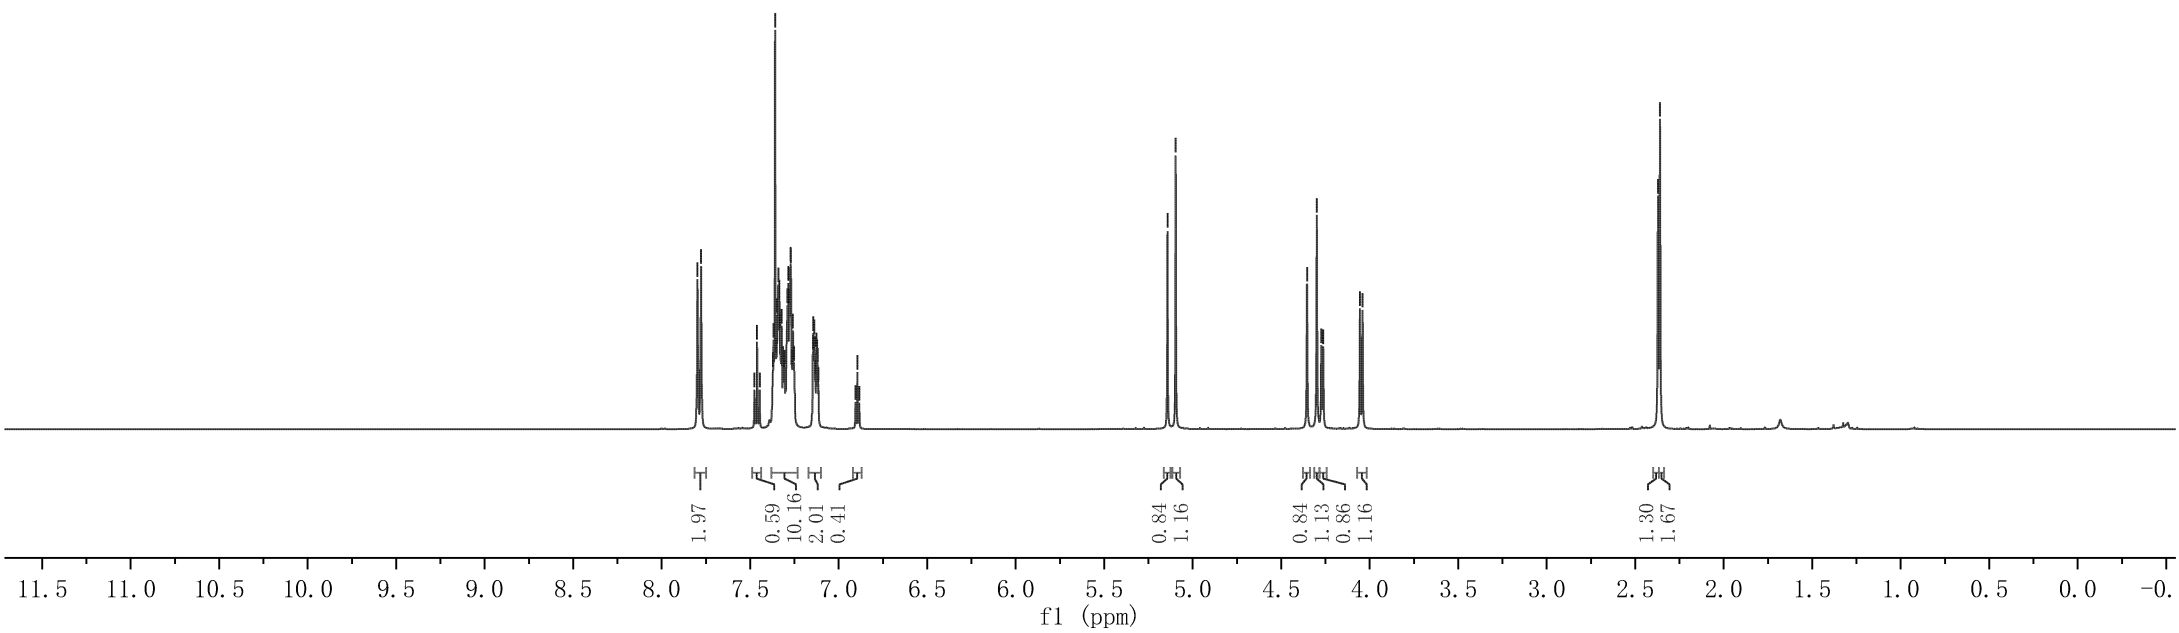

| Parameter                | Value               |
|--------------------------|---------------------|
| 1 Title                  | qlj-11-47-C         |
| 2 Origin                 | Bruker BioSpin GmbH |
| 3 Solvent                | CDC13               |
| 4 Temperature            | 296.1               |
| 5 Number of Scans        | 200                 |
| 6 Acquisition Time       | 1.3763              |
| 7 Acquisition Date       | 2025-06-27T09:02:18 |
| 8 Spectrometer Frequency | 100.64              |
| 9 Spectral Width         | 23809.5             |
| 10 Lowest Frequency      | -1850.6             |
| 11 Nucleus               | <sup>13</sup> C     |
| 12 Acquired Size         | 32768               |
| 13 Spectral Size         | 32768               |

147.87  
145.64  
143.88  
143.79  
131.50  
129.59  
128.36  
128.24  
128.11  
128.06  
127.74  
127.64  
121.88

86.02  
85.93  
81.55  
81.31  
77.32  
77.00  
76.68  
76.35  
76.10

45.92  
43.02  
39.10  
37.81

21.38

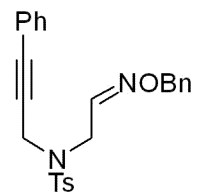

1t

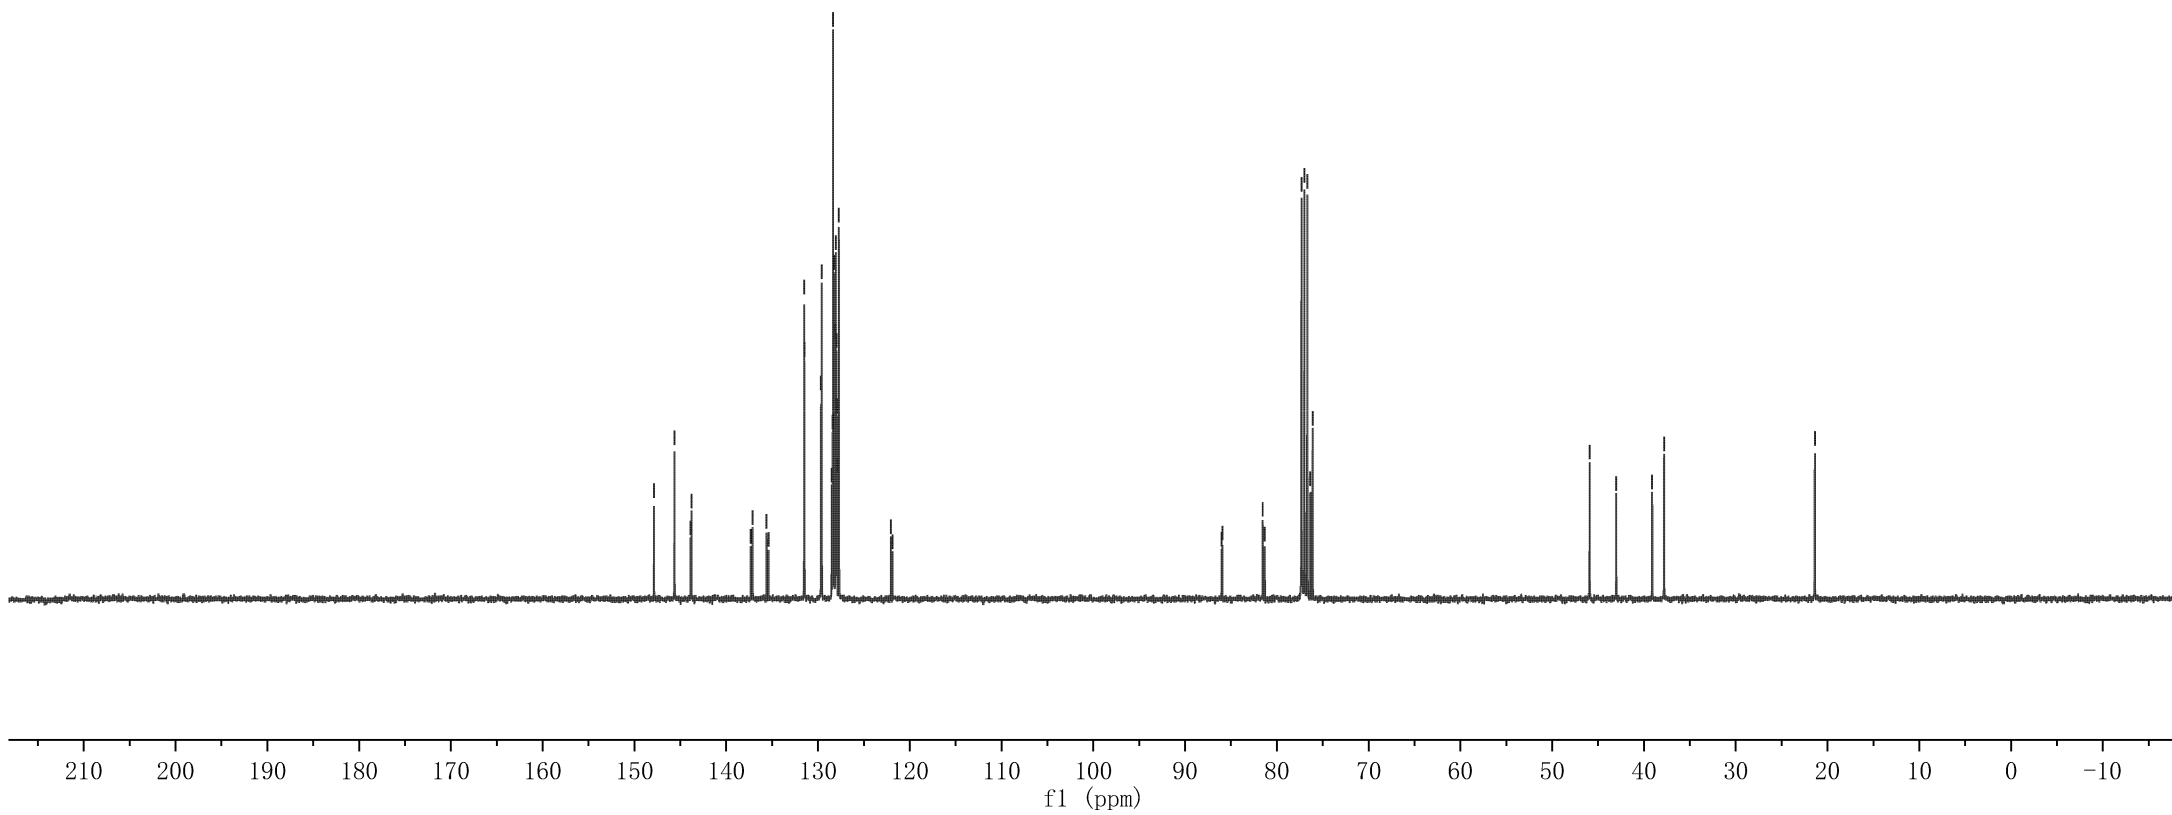

| Parameter                | Value               |
|--------------------------|---------------------|
| 1 Title                  | qlj-11-152-II       |
| 2 Origin                 | Bruker BioSpin GmbH |
| 3 Solvent                | CDC13               |
| 4 Temperature            | 291.7               |
| 5 Number of Scans        | 16                  |
| 6 Acquisition Time       | 3.9977              |
| 7 Acquisition Date       | 2026-03-21T12:07:57 |
| 8 Spectrometer Frequency | 400.25              |
| 9 Spectral Width         | 8196.7              |
| 10 Lowest Frequency      | -1626.8             |
| 11 Nucleus               | <sup>1</sup> H      |
| 12 Acquired Size         | 32768               |
| 13 Spectral Size         | 65536               |

7.806 7.786 7.288 7.284 7.267 7.263 7.133 6.841 6.831 6.820 4.365 4.339 4.212 4.202 4.166 4.149 4.131 4.109 4.092 4.074 4.041 4.026 2.375 2.356 1.264 1.246 1.229

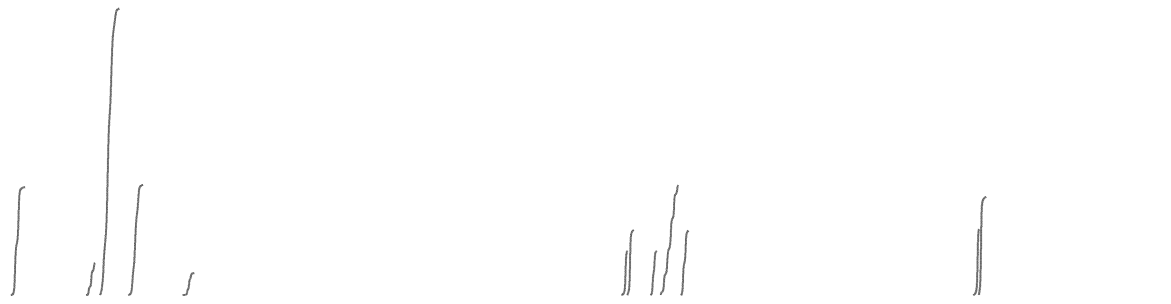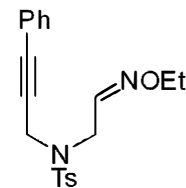

lu

11.5 11.0 10.5 10.0 9.5 9.0 8.5 8.0 7.5 7.0 6.5 6.0 5.5 5.0 4.5 4.0 3.5 3.0 2.5 2.0 1.5 1.0 0.5 0.0 -0.5

f1 (ppm)

| Parameter                | Value               |
|--------------------------|---------------------|
| 1 Title                  | qlj-11-152-C        |
| 2 Origin                 | Bruker BioSpin GmbH |
| 3 Solvent                | CDC13               |
| 4 Temperature            | 292.4               |
| 5 Number of Scans        | 250                 |
| 6 Acquisition Time       | 1.3763              |
| 7 Acquisition Date       | 2026-03-21T12:23:45 |
| 8 Spectrometer Frequency | 100.64              |
| 9 Spectral Width         | 23809.5             |
| 10 Lowest Frequency      | -1847.6             |
| 11 Nucleus               | <sup>13</sup> C     |
| 12 Acquired Size         | 32768               |
| 13 Spectral Size         | 32768               |

146.97  
144.69  
143.88  
143.81  
131.52  
131.47  
129.61  
128.12  
128.06  
127.75  
127.06  
121.94

85.91  
81.54  
81.37  
77.32  
77.00  
76.68  
70.00  
69.62

45.99  
43.00  
39.13  
37.81

21.44  
21.41  
14.53  
14.36

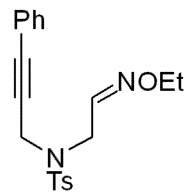

1u

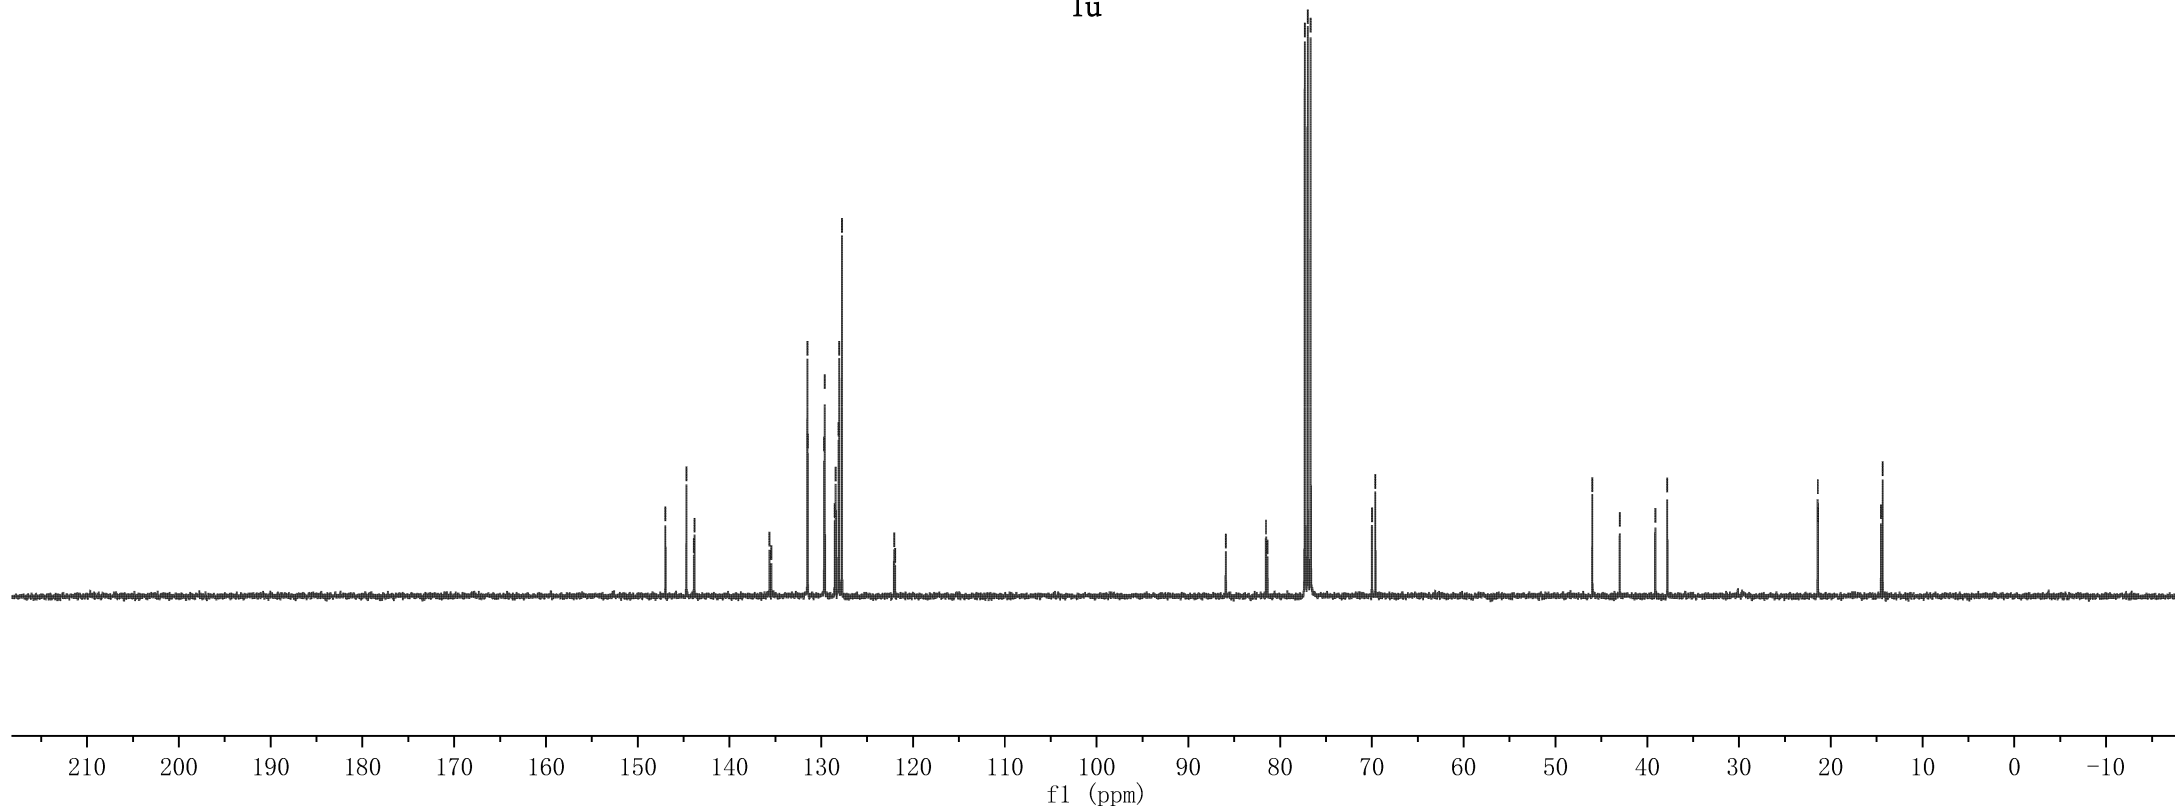

| Parameter                | Value               |
|--------------------------|---------------------|
| 1 Title                  | qlj-11-46-H         |
| 2 Origin                 | Bruker BioSpin GmbH |
| 3 Solvent                | CDC13               |
| 4 Temperature            | 295.2               |
| 5 Number of Scans        | 16                  |
| 6 Acquisition Time       | 3.9977              |
| 7 Acquisition Date       | 2025-06-25T18:16:29 |
| 8 Spectrometer Frequency | 400.25              |
| 9 Spectral Width         | 8196.7              |
| 10 Lowest Frequency      | -1693.5             |
| 11 Nucleus               | <sup>1</sup> H      |
| 12 Acquired Size         | 32768               |
| 13 Spectral Size         | 65536               |

7.641  
7.620  
7.374  
7.359  
7.344  
7.146  
7.139  
7.133  
7.122  
7.118  
7.110  
7.102  
7.097  
7.091  
7.080  
7.074  
6.981  
6.963  
6.946  
6.942  
6.888  
6.877  
6.867

4.192  
4.162  
4.119  
4.109  
3.905  
3.891

2.204  
2.189

0.770  
0.751

0.007  
0.000

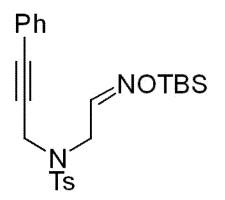

1v

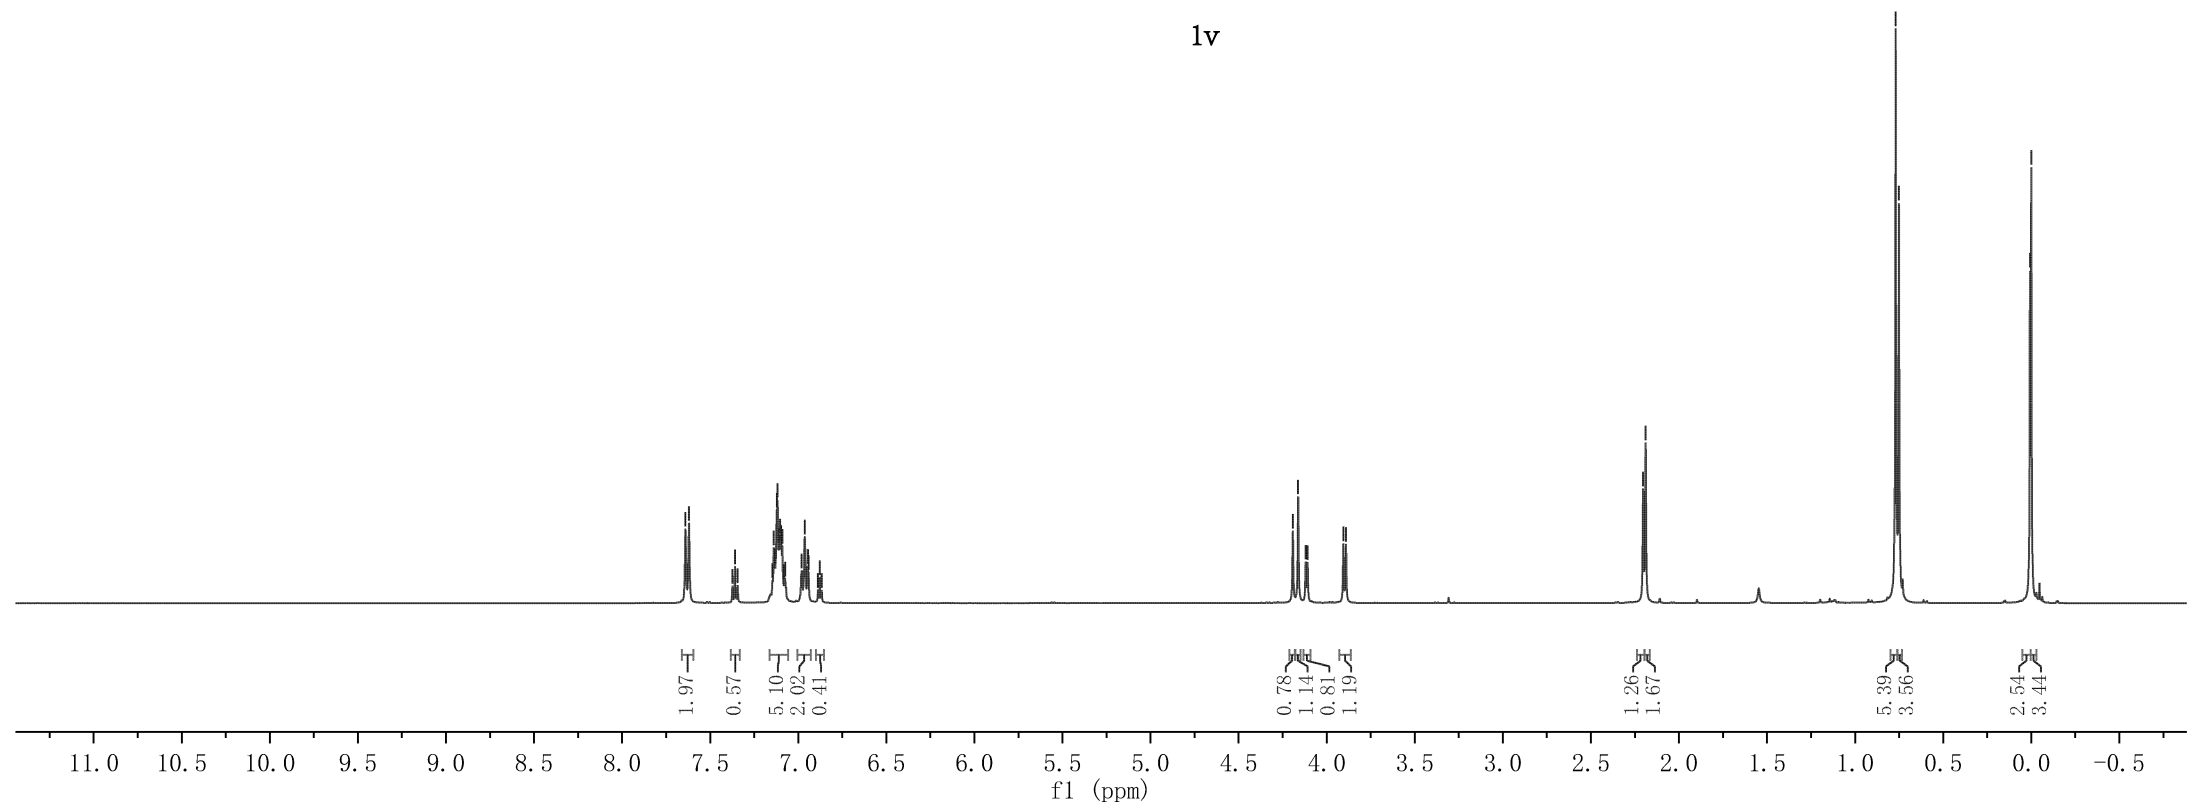

| Parameter                | Value               |
|--------------------------|---------------------|
| 1 Title                  | qlj-11-46-C         |
| 2 Origin                 | Bruker BioSpin GmbH |
| 3 Solvent                | CDC13               |
| 4 Temperature            | 295.9               |
| 5 Number of Scans        | 200                 |
| 6 Acquisition Time       | 1.3763              |
| 7 Acquisition Date       | 2025-06-25T18:28:20 |
| 8 Spectrometer Frequency | 100.64              |
| 9 Spectral Width         | 23809.5             |
| 10 Lowest Frequency      | -1849.6             |
| 11 Nucleus               | 13C                 |
| 12 Acquired Size         | 32768               |
| 13 Spectral Size         | 32768               |

151.75  
149.73  
143.85  
143.77  
131.50  
129.65  
129.60  
128.07  
128.02  
127.74  
122.68

85.92  
81.45  
81.35  
77.32  
77.00  
76.68

45.87  
42.75  
39.12  
37.72

25.94  
25.86  
21.39  
21.37  
18.06  
18.02

-5.41  
-5.42

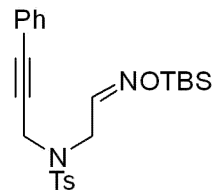

1v

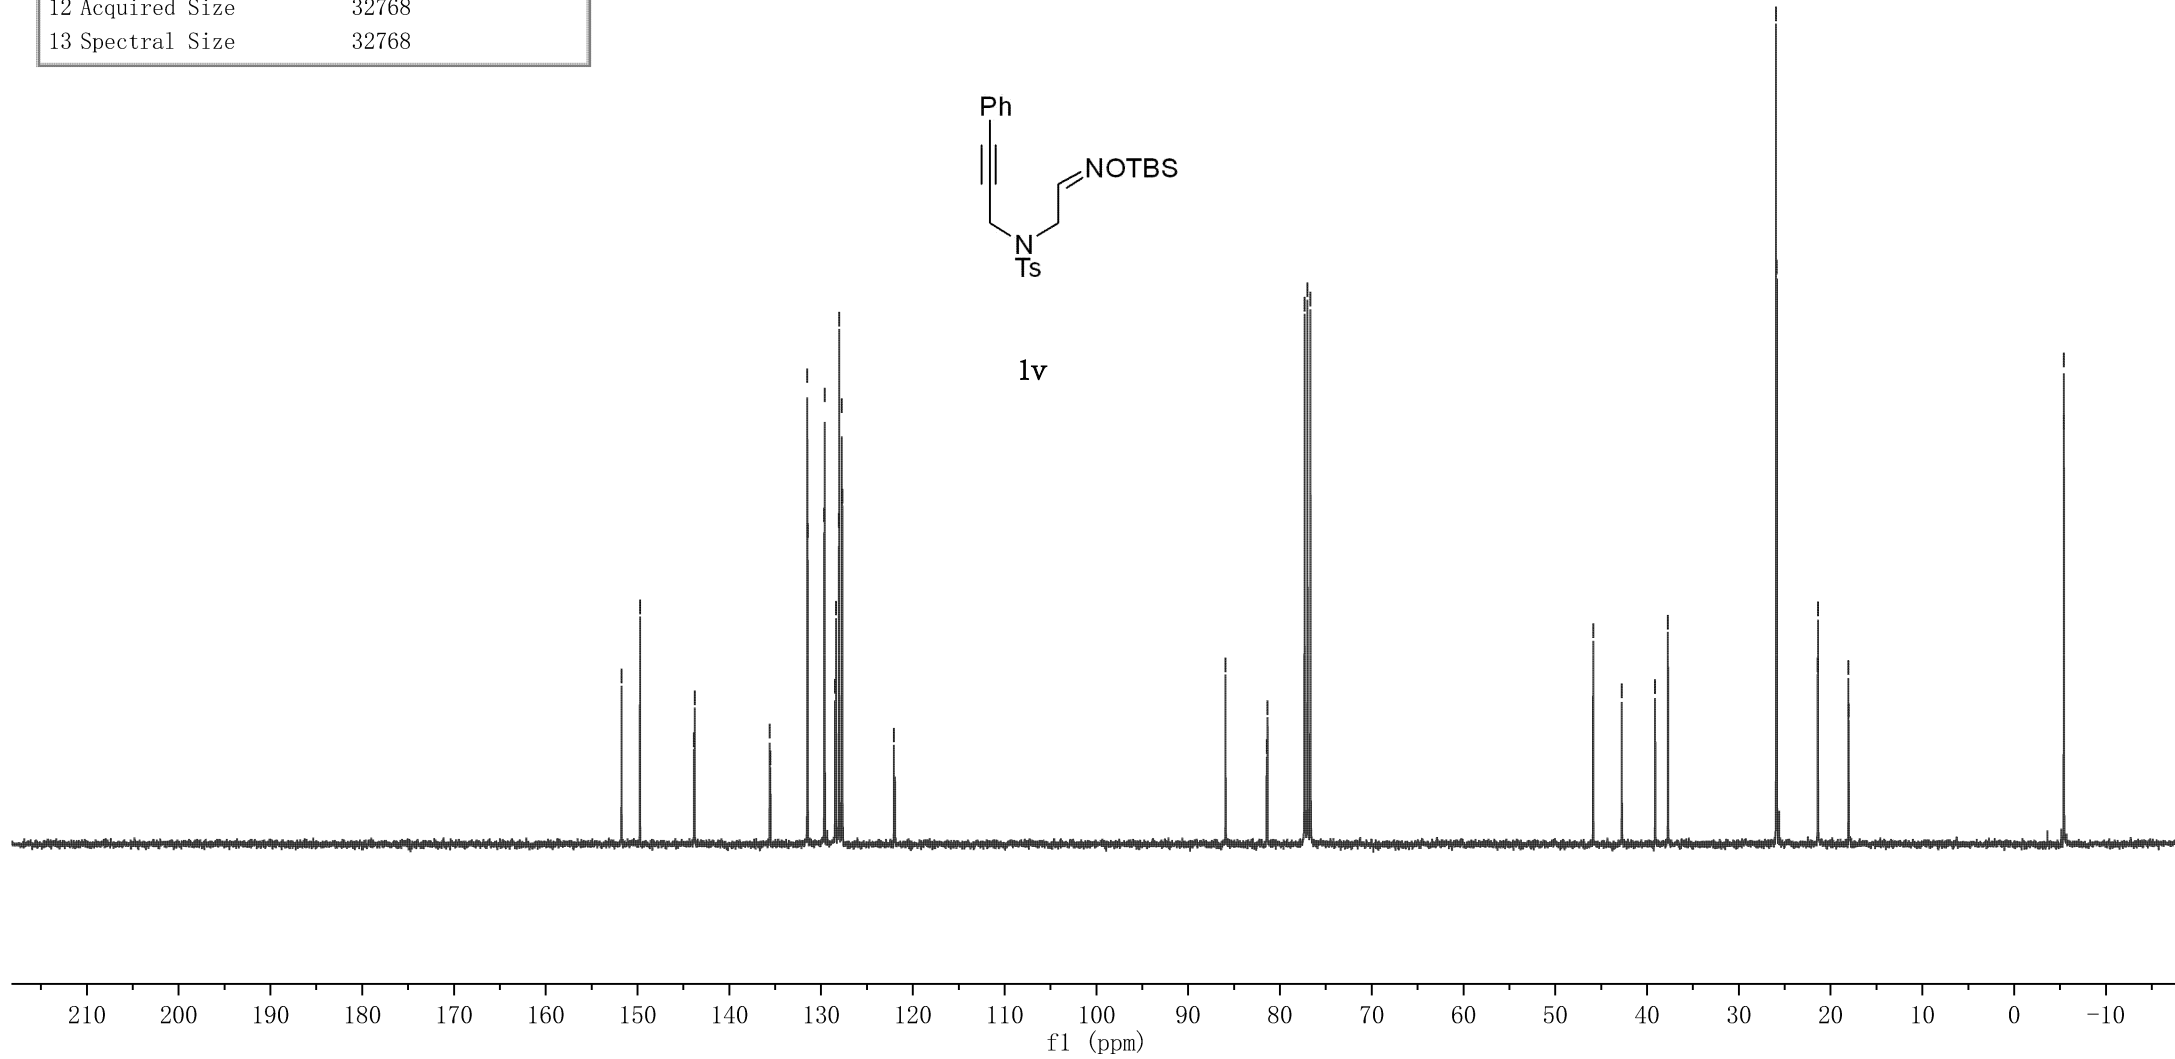

| Parameter                | Value               |
|--------------------------|---------------------|
| 1 Title                  | qlj-7-178-H         |
| 2 Origin                 | Bruker BioSpin GmbH |
| 3 Solvent                | CDC13               |
| 4 Temperature            | 294.4               |
| 5 Number of Scans        | 16                  |
| 6 Acquisition Time       | 3.9977              |
| 7 Acquisition Date       | 2024-04-25T12:01:59 |
| 8 Spectrometer Frequency | 400.25              |
| 9 Spectral Width         | 8196.7              |
| 10 Lowest Frequency      | -1626.8             |
| 11 Nucleus               | <sup>1</sup> H      |
| 12 Acquired Size         | 32768               |
| 13 Spectral Size         | 65536               |

7.748  
7.744  
7.728  
7.723

7.332  
7.325  
7.306  
7.293  
7.279  
6.762  
6.752

4.128  
4.122  
4.115  
4.110  
4.100  
3.958  
3.943  
3.880  
3.829

2.435  
2.126  
2.121  
2.115  
2.100  
2.094  
2.089

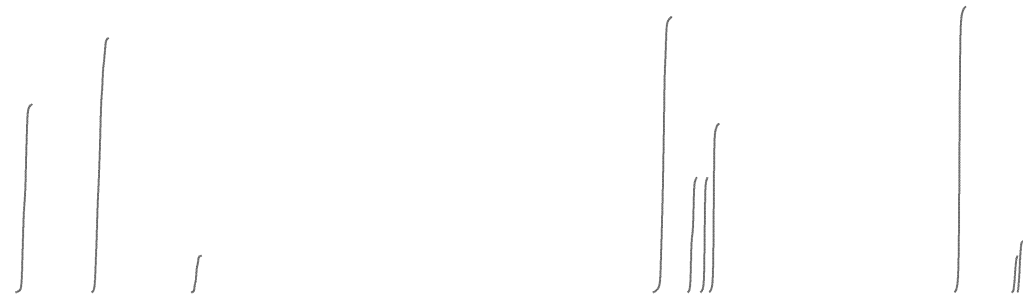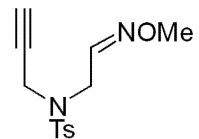

1w

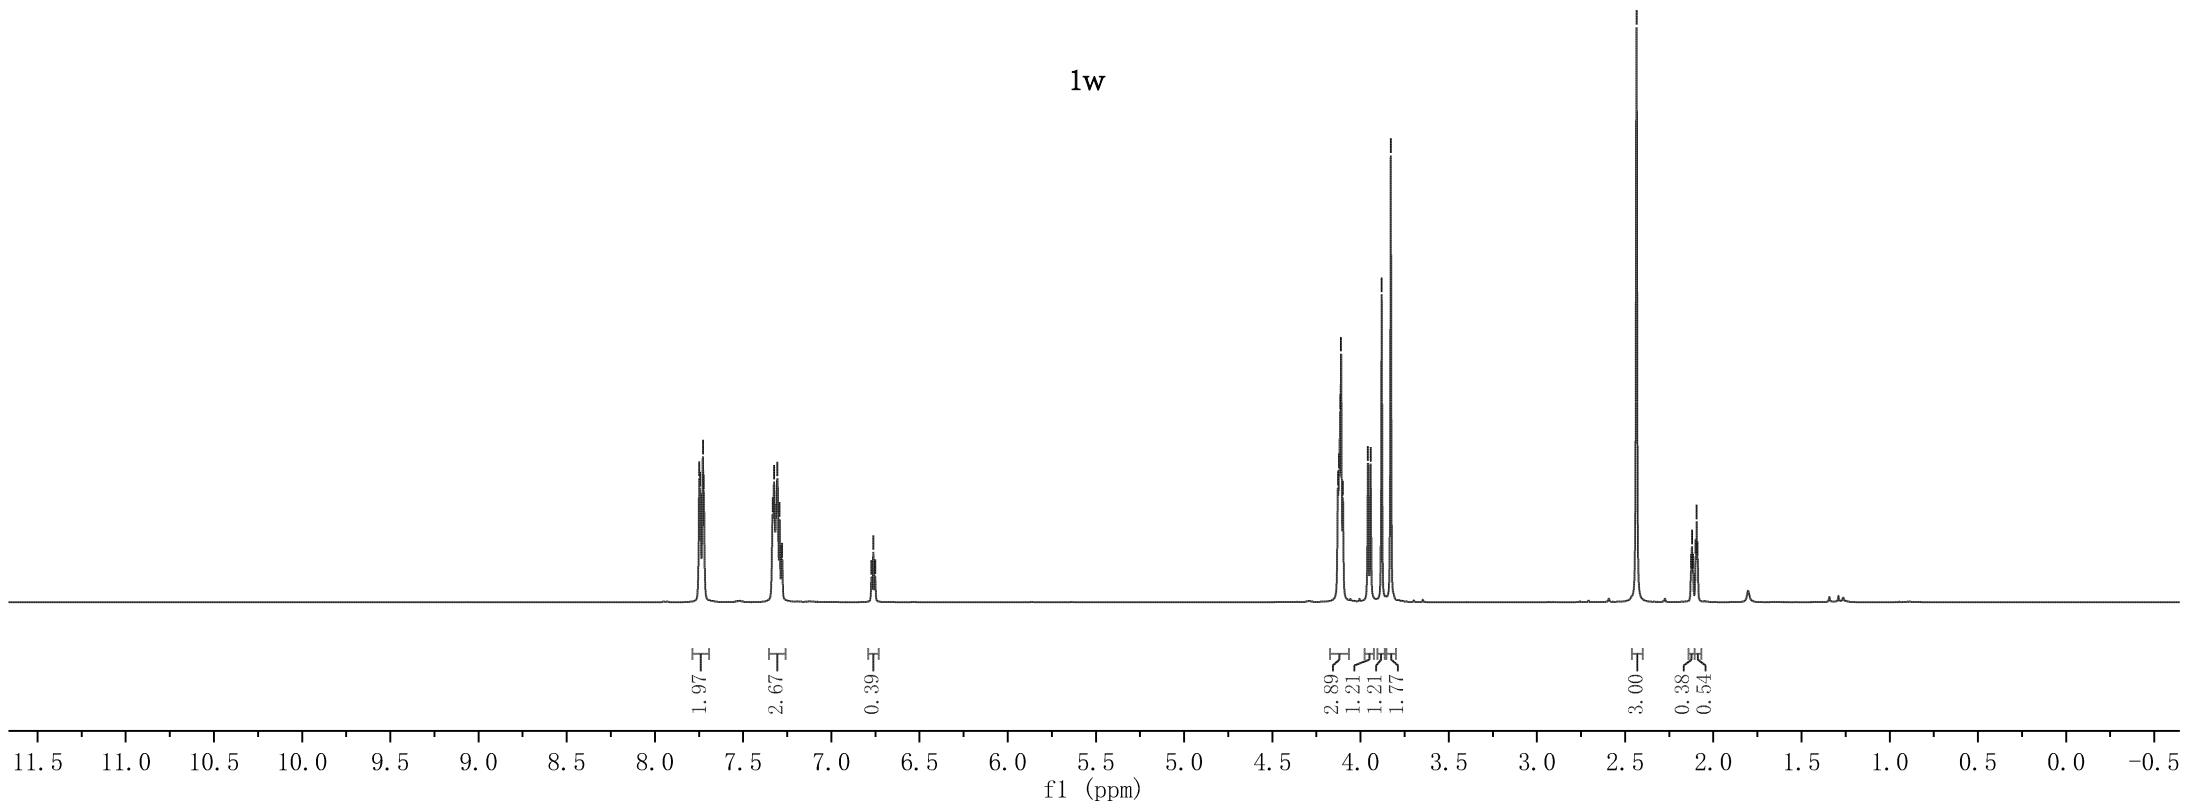

| Parameter                | Value               |
|--------------------------|---------------------|
| 1 Title                  | qlj-7-178-C         |
| 2 Origin                 | Bruker BioSpin GmbH |
| 3 Solvent                | CDC13               |
| 4 Temperature            | 295.2               |
| 5 Number of Scans        | 250                 |
| 6 Acquisition Time       | 1.3763              |
| 7 Acquisition Date       | 2024-04-25T12:16:40 |
| 8 Spectrometer Frequency | 100.64              |
| 9 Spectral Width         | 23809.5             |
| 10 Lowest Frequency      | -1850.3             |
| 11 Nucleus               | <sup>13</sup> C     |
| 12 Acquired Size         | 32768               |
| 13 Spectral Size         | 32768               |

147.22  
144.75  
143.98  
143.89  
135.55  
135.24  
129.65  
129.56  
127.64  
127.63

77.32  
77.00  
76.68  
76.34  
76.21  
74.28  
74.12

62.10  
61.78

45.45  
42.79  
38.26  
36.81

21.48

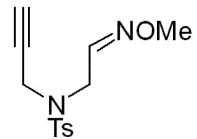

1w

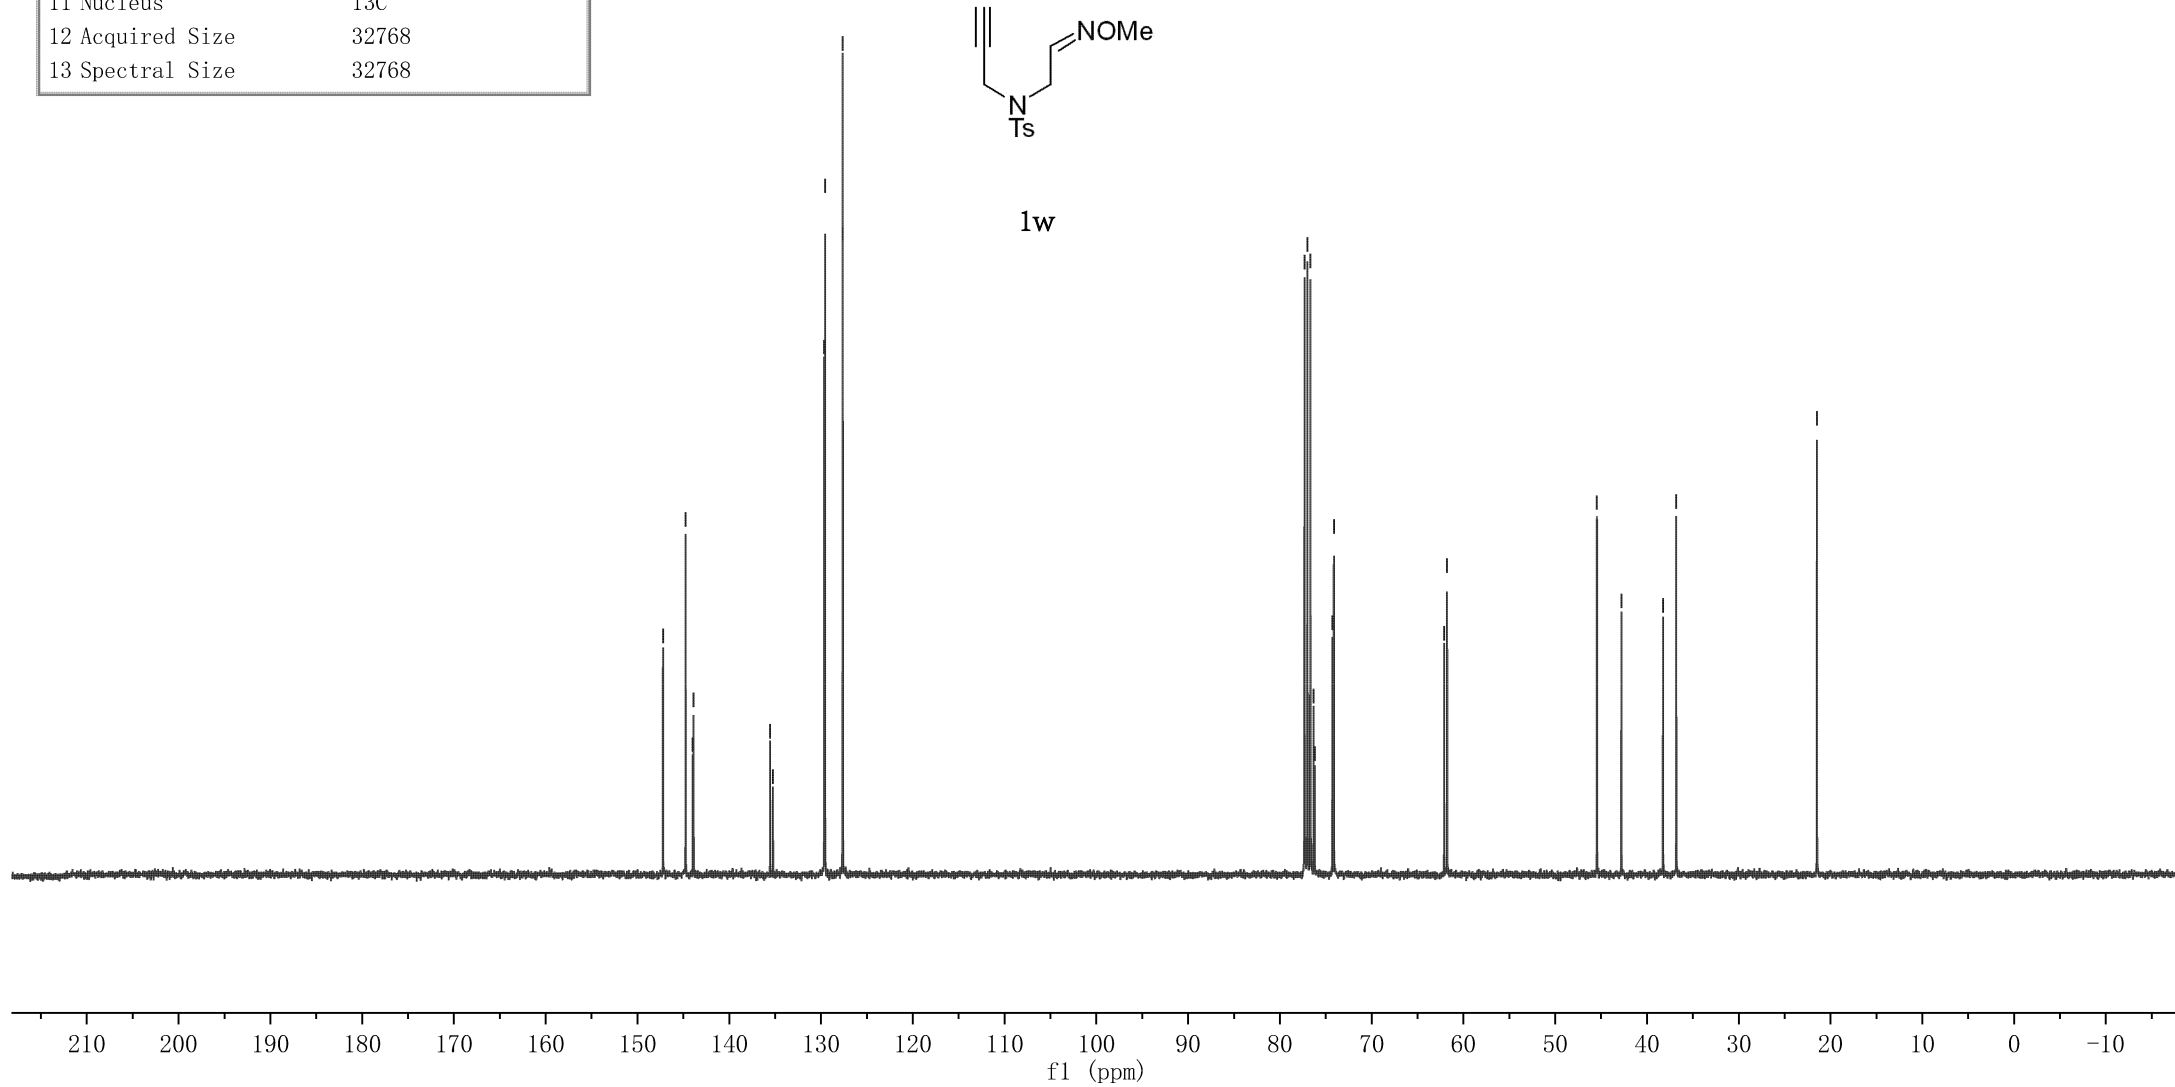

| Parameter                | Value               |
|--------------------------|---------------------|
| 1 Title                  | qlj-11-43-H         |
| 2 Origin                 | Bruker BioSpin GmbH |
| 3 Solvent                | CDC13               |
| 4 Temperature            | 296.0               |
| 5 Number of Scans        | 16                  |
| 6 Acquisition Time       | 3.9977              |
| 7 Acquisition Date       | 2025-06-21T16:39:39 |
| 8 Spectrometer Frequency | 400.25              |
| 9 Spectral Width         | 8196.7              |
| 10 Lowest Frequency      | -1668.1             |
| 11 Nucleus               | 1H                  |
| 12 Acquired Size         | 32768               |
| 13 Spectral Size         | 65536               |

8.794 8.404 7.698 7.692 7.677 7.671 7.351 7.336 7.321 7.202 7.193 7.187 7.184 7.180 7.173 7.158 7.153 7.143 7.139 7.131 7.122 7.117 7.040 7.037 7.020 7.003 6.999 6.833 4.250 4.220 4.146 4.136 3.943 3.928 2.256 2.241

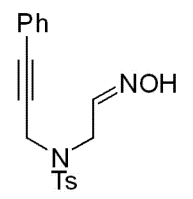

1aa

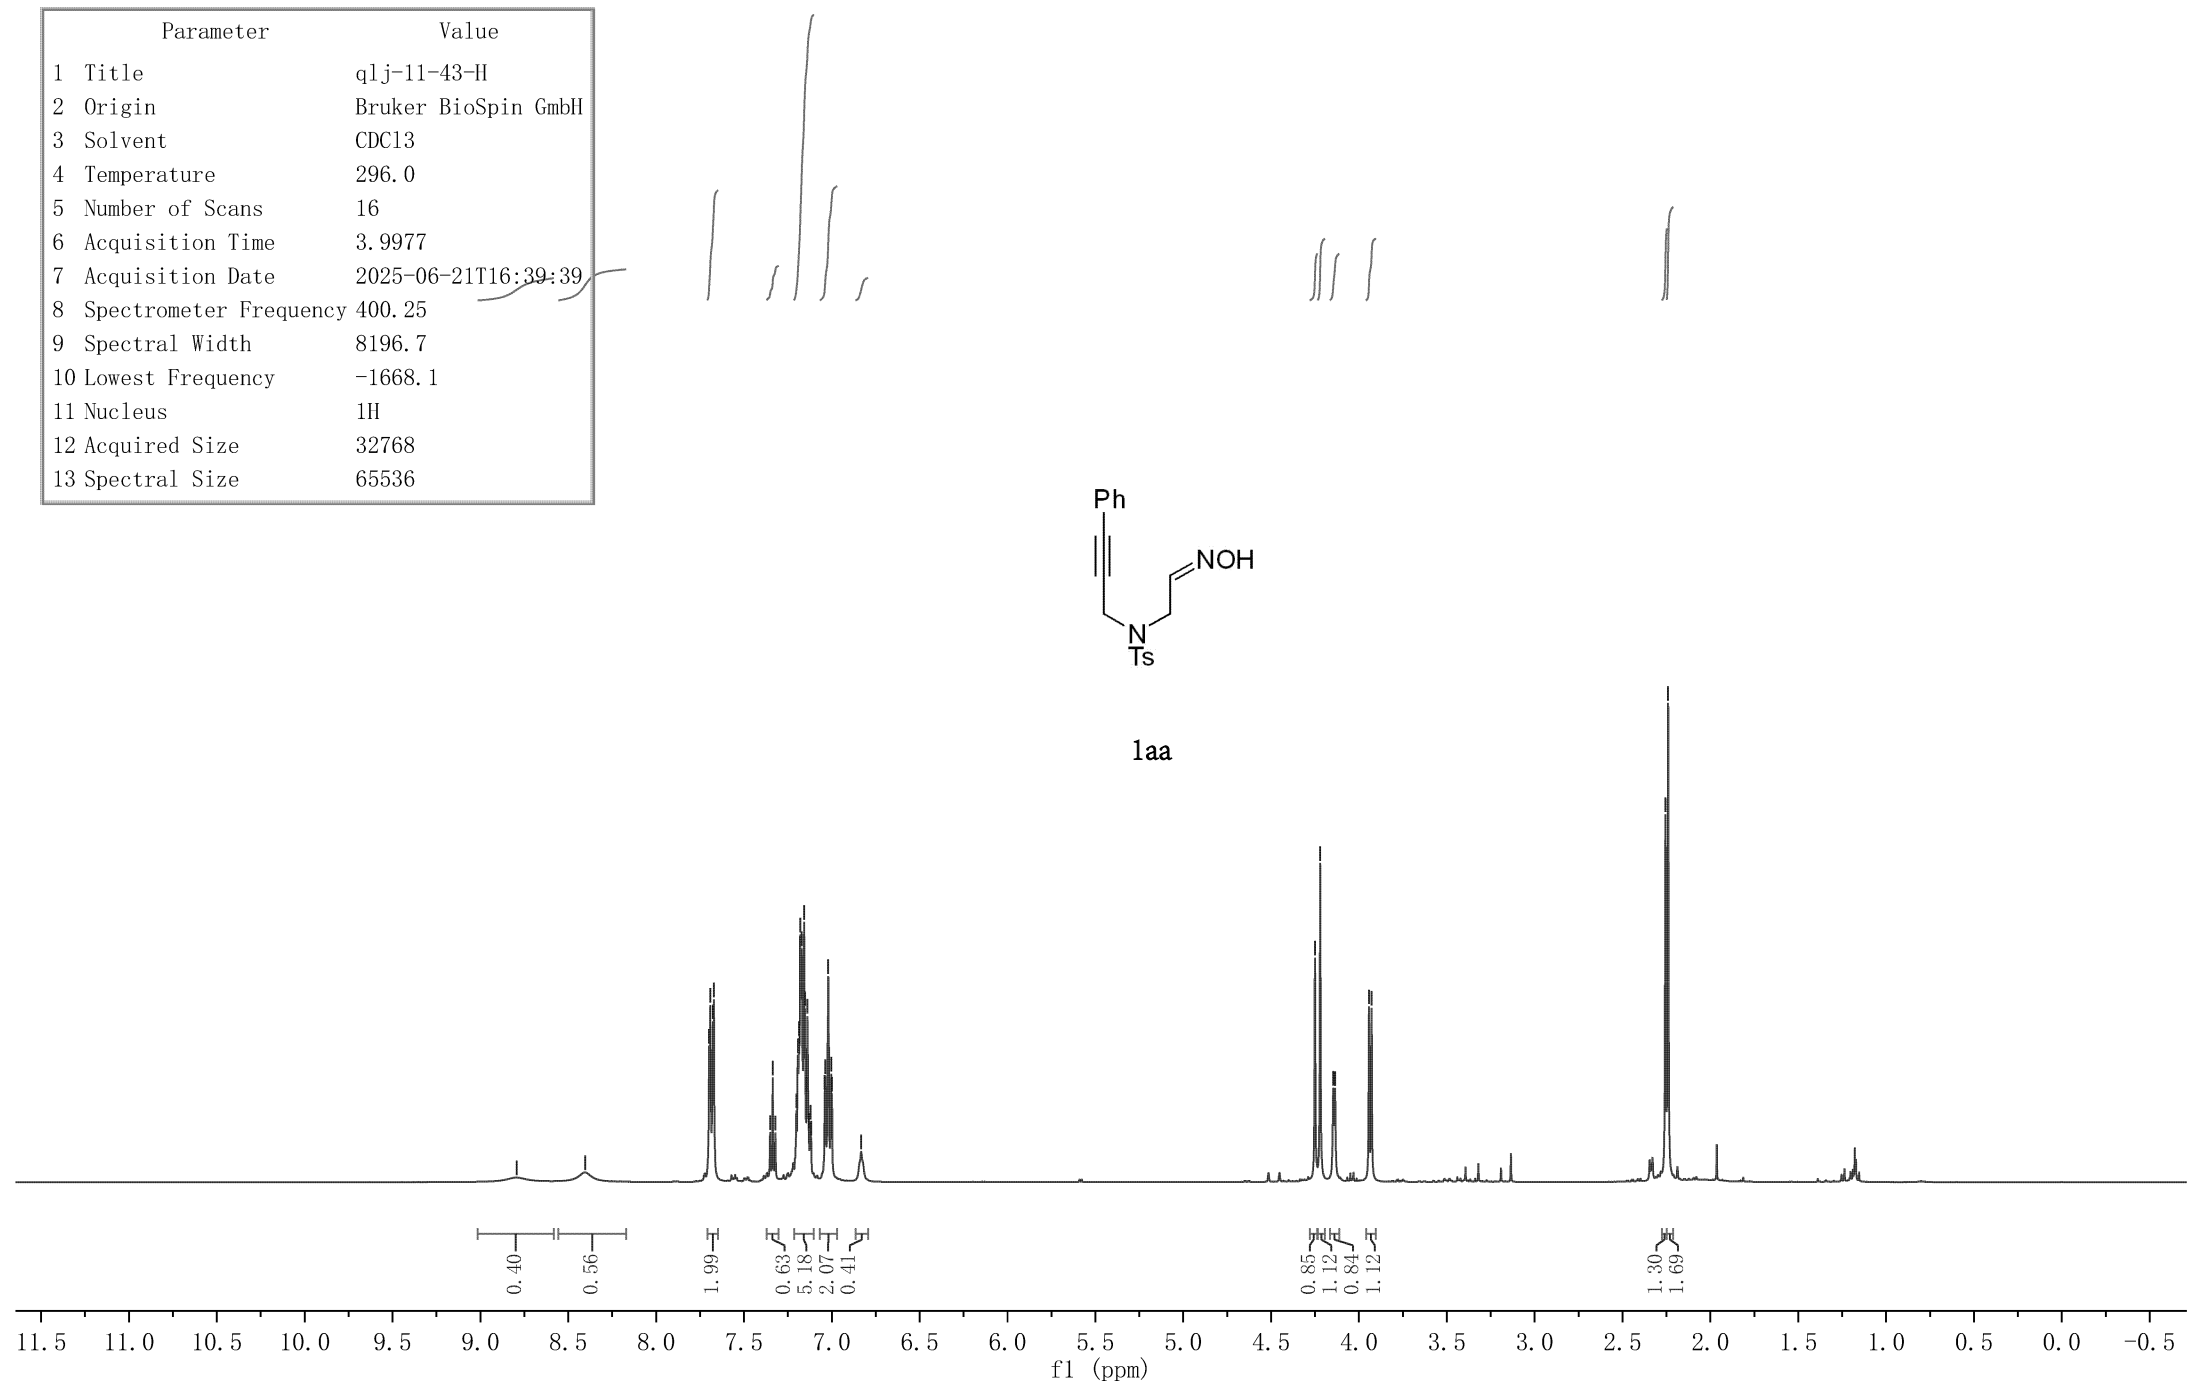

| Parameter                | Value               |
|--------------------------|---------------------|
| 1 Title                  | qlj-11-43-C         |
| 2 Origin                 | Bruker BioSpin GmbH |
| 3 Solvent                | CDC13               |
| 4 Temperature            | 296.7               |
| 5 Number of Scans        | 111                 |
| 6 Acquisition Time       | 1.3763              |
| 7 Acquisition Date       | 2025-06-21T16:46:22 |
| 8 Spectrometer Frequency | 100.64              |
| 9 Spectral Width         | 23809.5             |
| 10 Lowest Frequency      | -1850.9             |
| 11 Nucleus               | 13C                 |
| 12 Acquired Size         | 32768               |
| 13 Spectral Size         | 32768               |

148.71  
146.57  
143.97  
143.91  
131.50  
131.46  
129.63  
128.09  
128.04  
127.73  
127.89  
121.83

86.06  
86.04  
81.26  
81.23  
77.32  
77.00  
76.68

45.70  
42.62  
39.30  
37.81

21.38  
21.36

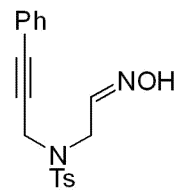

1aa

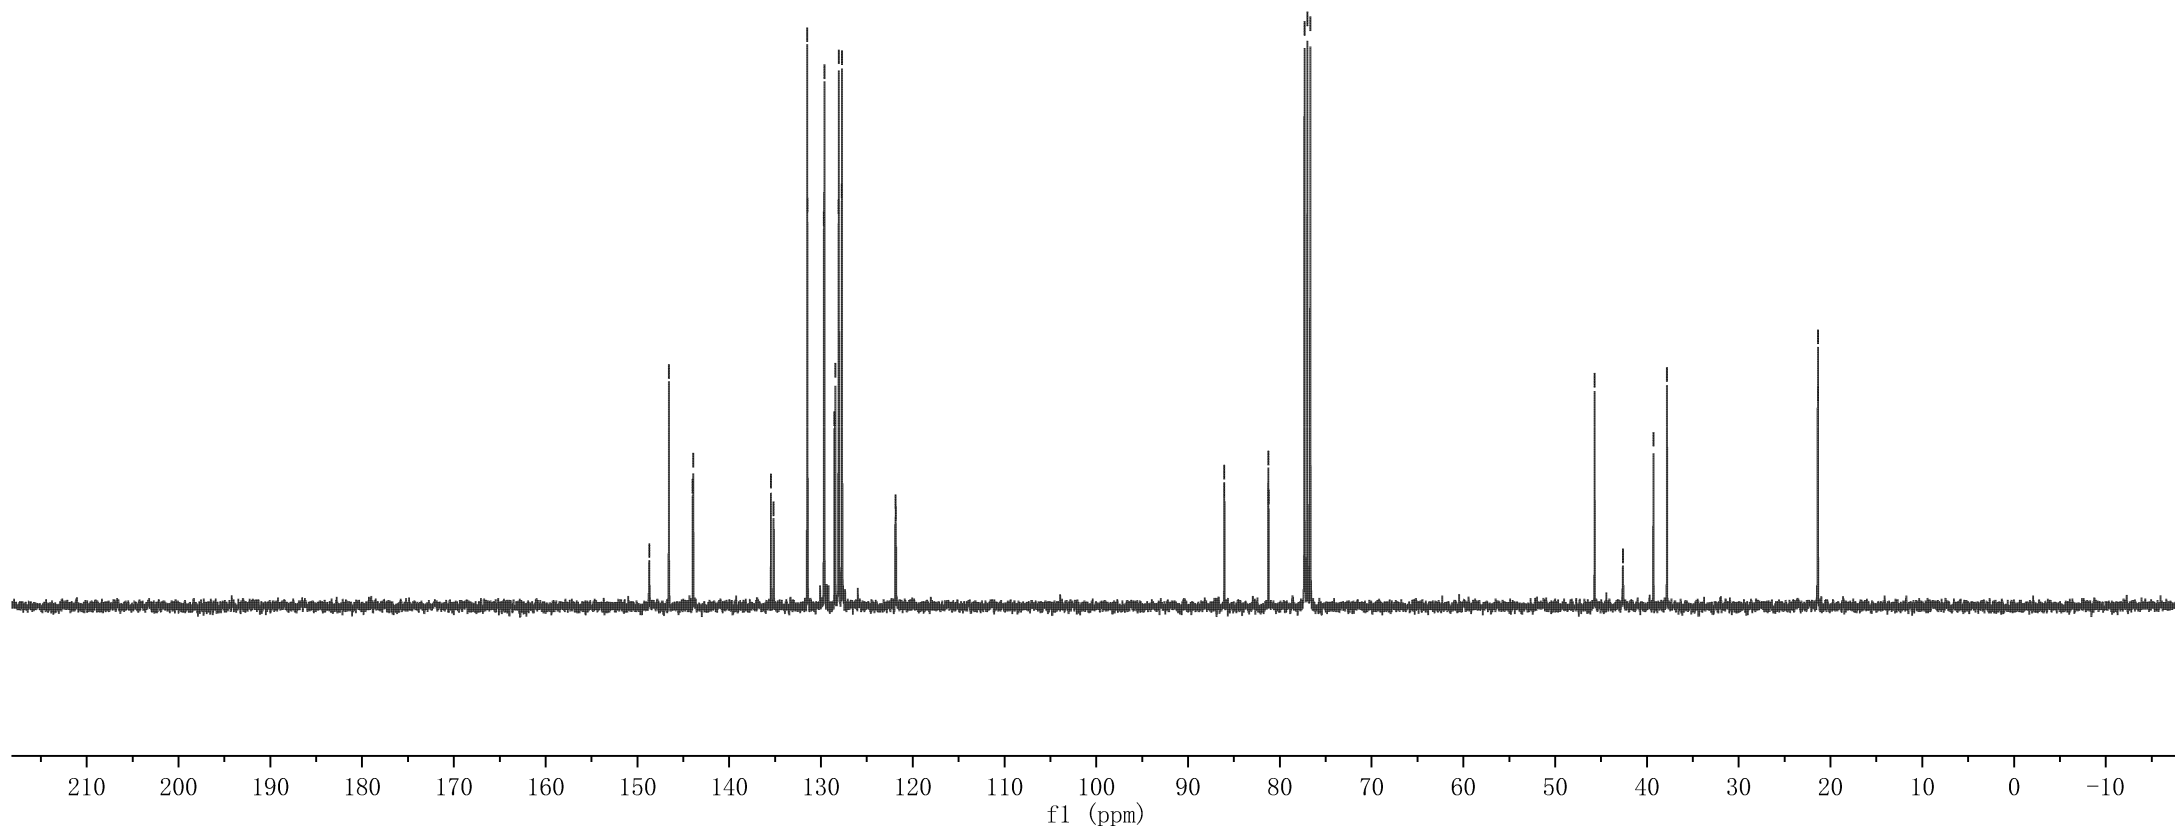

| Parameter                | Value               |
|--------------------------|---------------------|
| 1 Title                  | qlj-11-32-H         |
| 2 Origin                 | Bruker BioSpin GmbH |
| 3 Solvent                | CDC13               |
| 4 Temperature            | 295.5               |
| 5 Number of Scans        | 16                  |
| 6 Acquisition Time       | 3.9977              |
| 7 Acquisition Date       | 2025-06-06T14:01:27 |
| 8 Spectrometer Frequency | 400.25              |
| 9 Spectral Width         | 8196.7              |
| 10 Lowest Frequency      | -1706.0             |
| 11 Nucleus               | <sup>1</sup> H      |
| 12 Acquired Size         | 32768               |
| 13 Spectral Size         | 65536               |

7.578 7.558 7.302 7.284 7.186 7.174 7.166 7.157 7.138 7.118 7.100 7.086 5.919 5.913 5.909 5.902 5.549 4.109 4.105 4.079 4.076 4.010 3.999 3.966 3.955 3.892 3.425 3.153 3.110 2.376 2.370 2.347 2.341 2.262

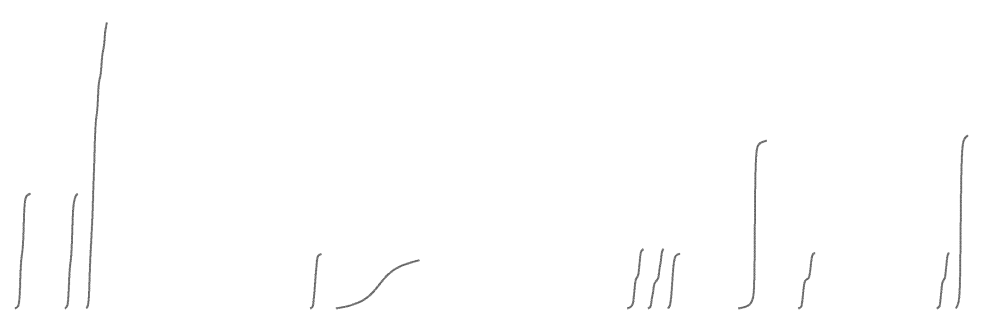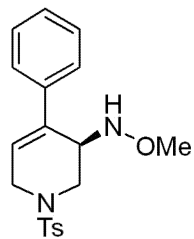

2a

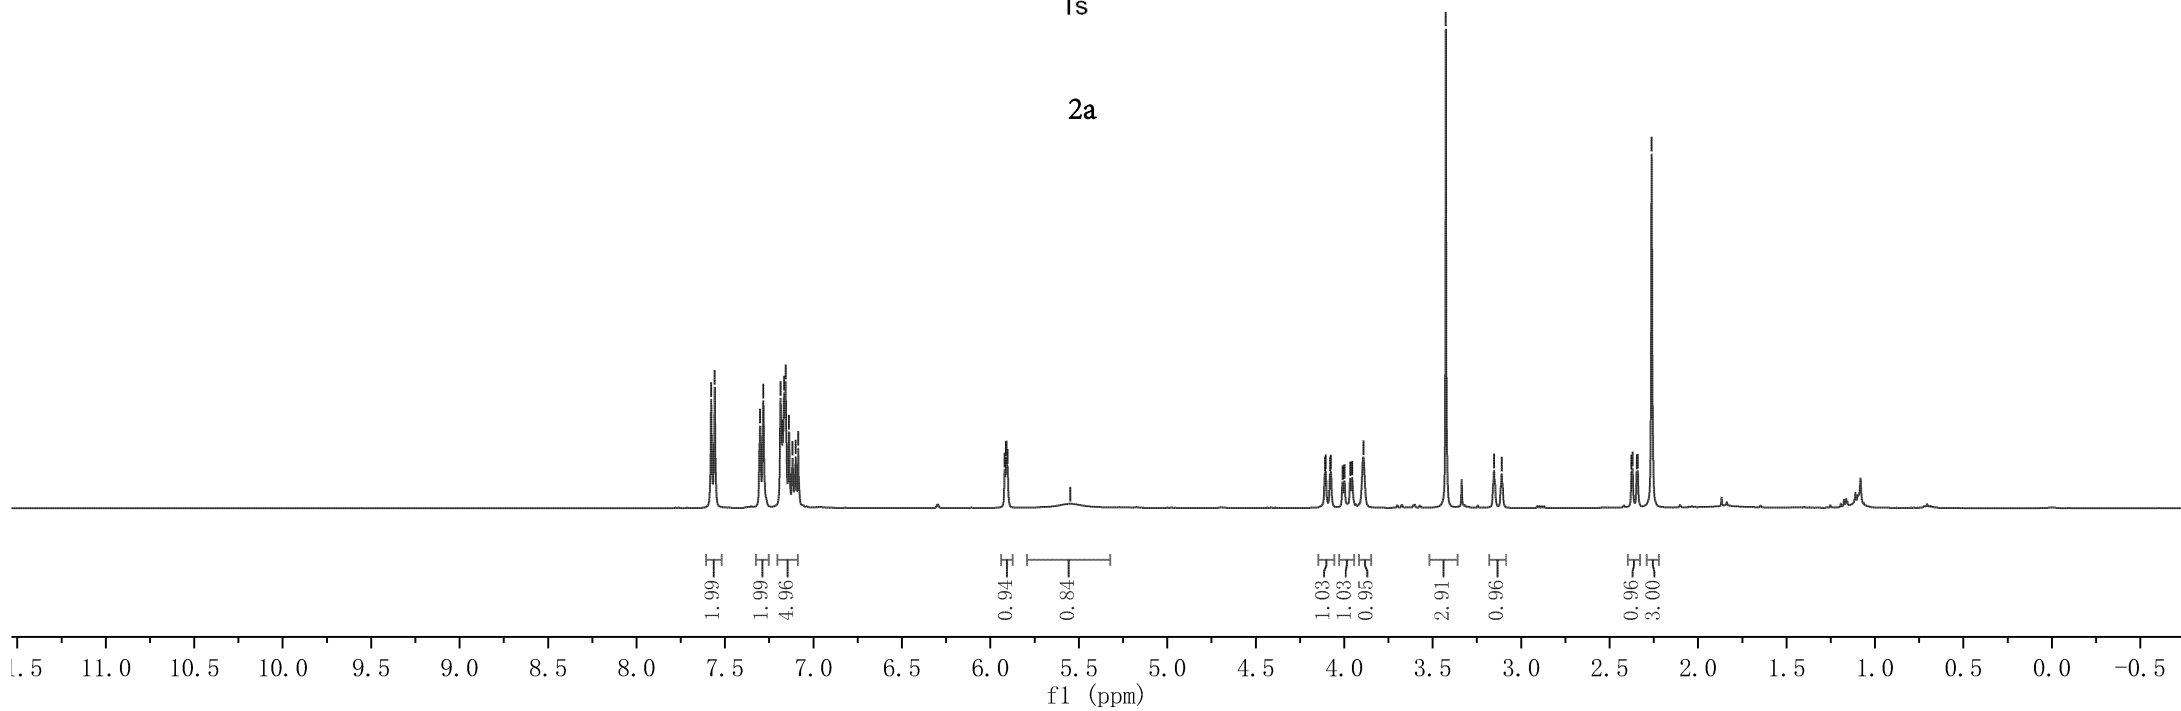

| Parameter                | Value               |
|--------------------------|---------------------|
| 1 Title                  | qlj-11-32-C         |
| 2 Origin                 | Bruker BioSpin GmbH |
| 3 Solvent                | CDC13               |
| 4 Temperature            | 295.7               |
| 5 Number of Scans        | 250                 |
| 6 Acquisition Time       | 1.3763              |
| 7 Acquisition Date       | 2025-06-06T14:16:08 |
| 8 Spectrometer Frequency | 100.64              |
| 9 Spectral Width         | 23809.5             |
| 10 Lowest Frequency      | -1850.3             |
| 11 Nucleus               | 13C                 |
| 12 Acquired Size         | 32768               |
| 13 Spectral Size         | 32768               |

143.77  
138.43  
133.71  
132.87  
129.70  
128.58  
127.86  
127.73  
125.56  
124.00

77.32  
77.00  
76.68

61.99  
56.43

45.43  
44.80

21.47

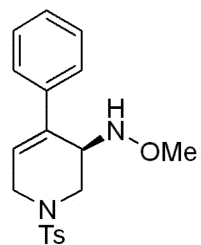

2a

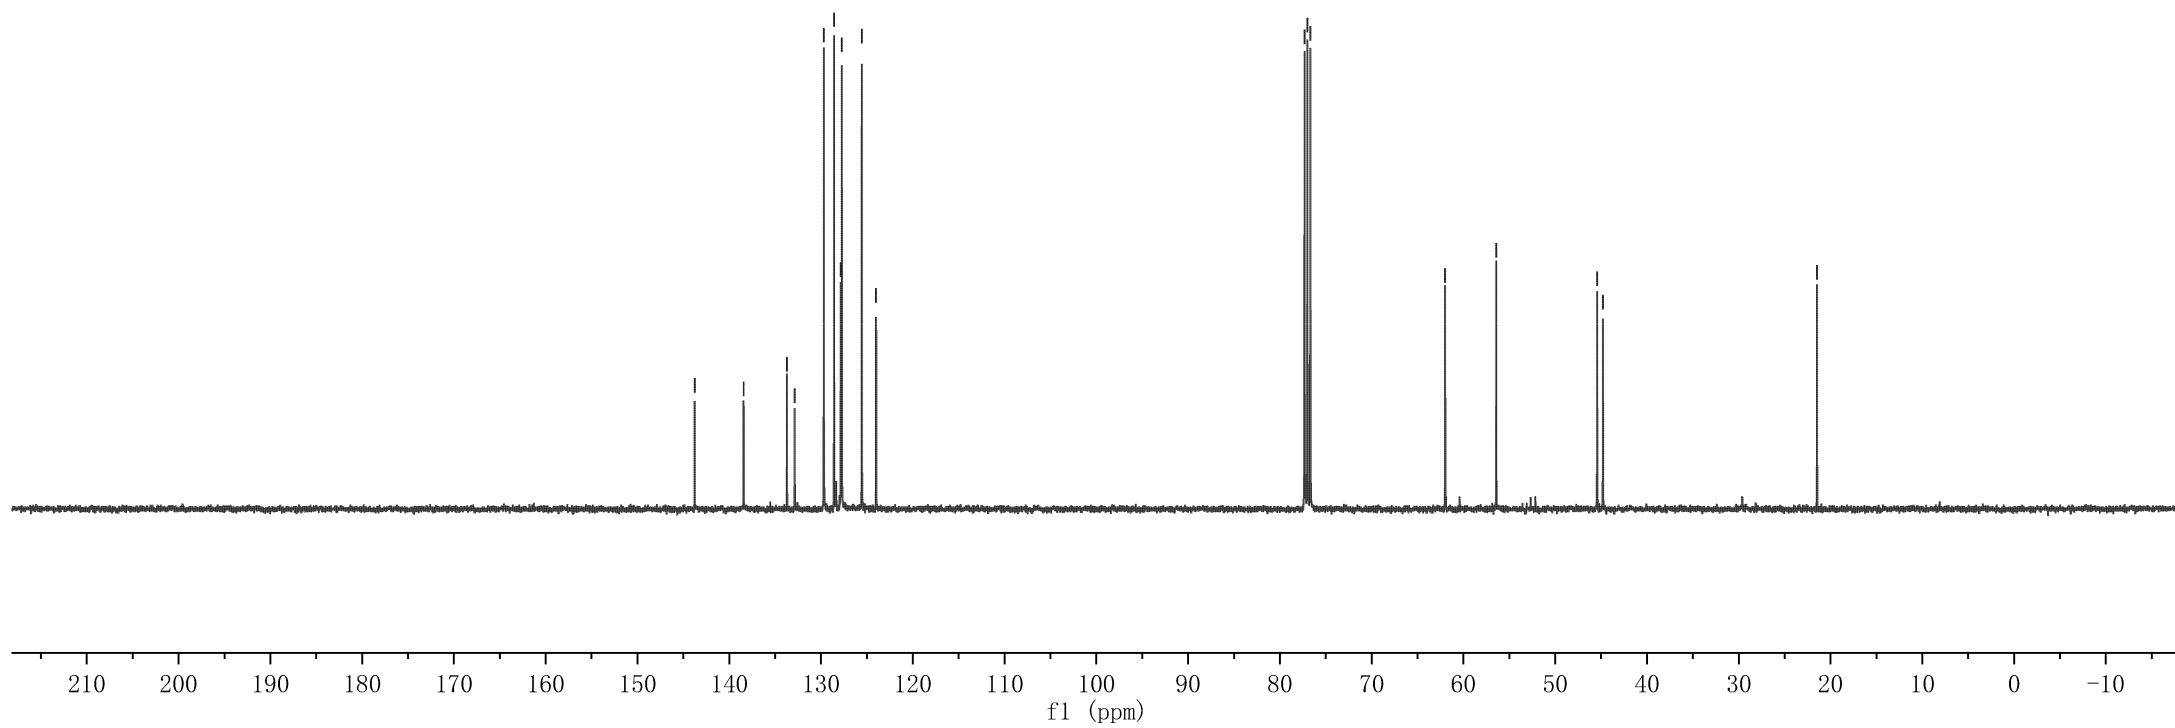

| Parameter                | Value               |
|--------------------------|---------------------|
| 1 Title                  | qlj-11-33-H         |
| 2 Origin                 | Bruker BioSpin GmbH |
| 3 Solvent                | CDC13               |
| 4 Temperature            | 294.8               |
| 5 Number of Scans        | 16                  |
| 6 Acquisition Time       | 3.9977              |
| 7 Acquisition Date       | 2025-06-05T14:03:09 |
| 8 Spectrometer Frequency | 400.25              |
| 9 Spectral Width         | 8196.7              |
| 10 Lowest Frequency      | -1636.3             |
| 11 Nucleus               | <sup>1</sup> H      |
| 12 Acquired Size         | 32768               |
| 13 Spectral Size         | 65536               |

7.748  
7.728  
7.415  
7.393  
7.355  
7.335  
7.260  
6.873  
6.850  
6.002  
5.996  
5.991  
5.985  
5.719  
4.277  
4.274  
4.248  
4.245  
4.167  
4.156  
4.124  
4.113  
4.026  
3.798  
3.606  
3.305  
3.263  
2.525  
2.519  
2.495  
2.490  
2.435

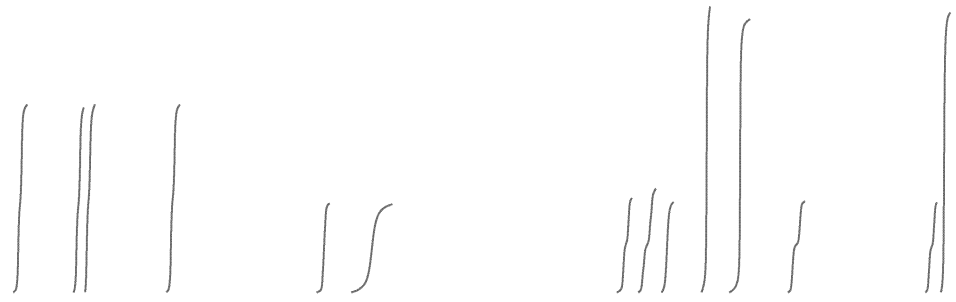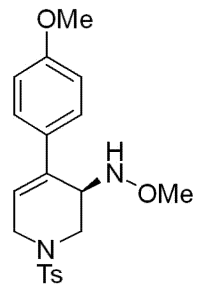

2b

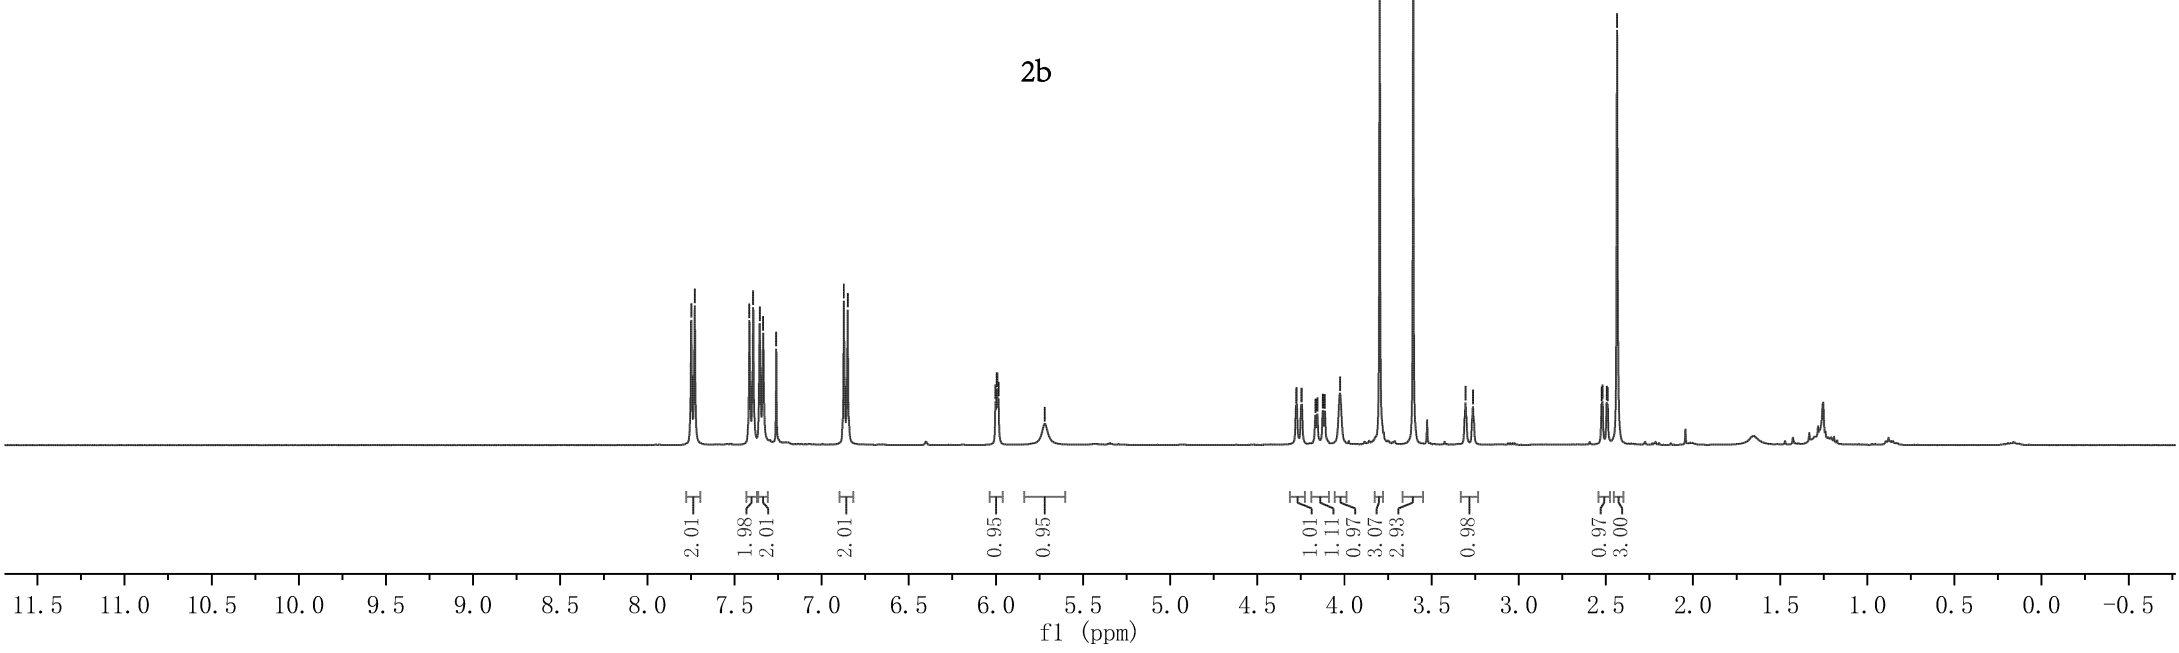

| Parameter                | Value               |
|--------------------------|---------------------|
| 1 Title                  | qlj-11-33-C         |
| 2 Origin                 | Bruker BioSpin GmbH |
| 3 Solvent                | CDC13               |
| 4 Temperature            | 295.6               |
| 5 Number of Scans        | 250                 |
| 6 Acquisition Time       | 1.3763              |
| 7 Acquisition Date       | 2025-06-05T14:17:51 |
| 8 Spectrometer Frequency | 100.64              |
| 9 Spectral Width         | 23809.5             |
| 10 Lowest Frequency      | -1846.1             |
| 11 Nucleus               | 13C                 |
| 12 Acquired Size         | 32768               |
| 13 Spectral Size         | 32768               |

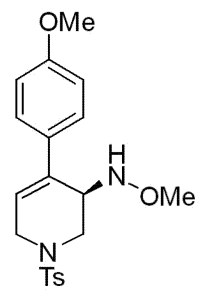

2b

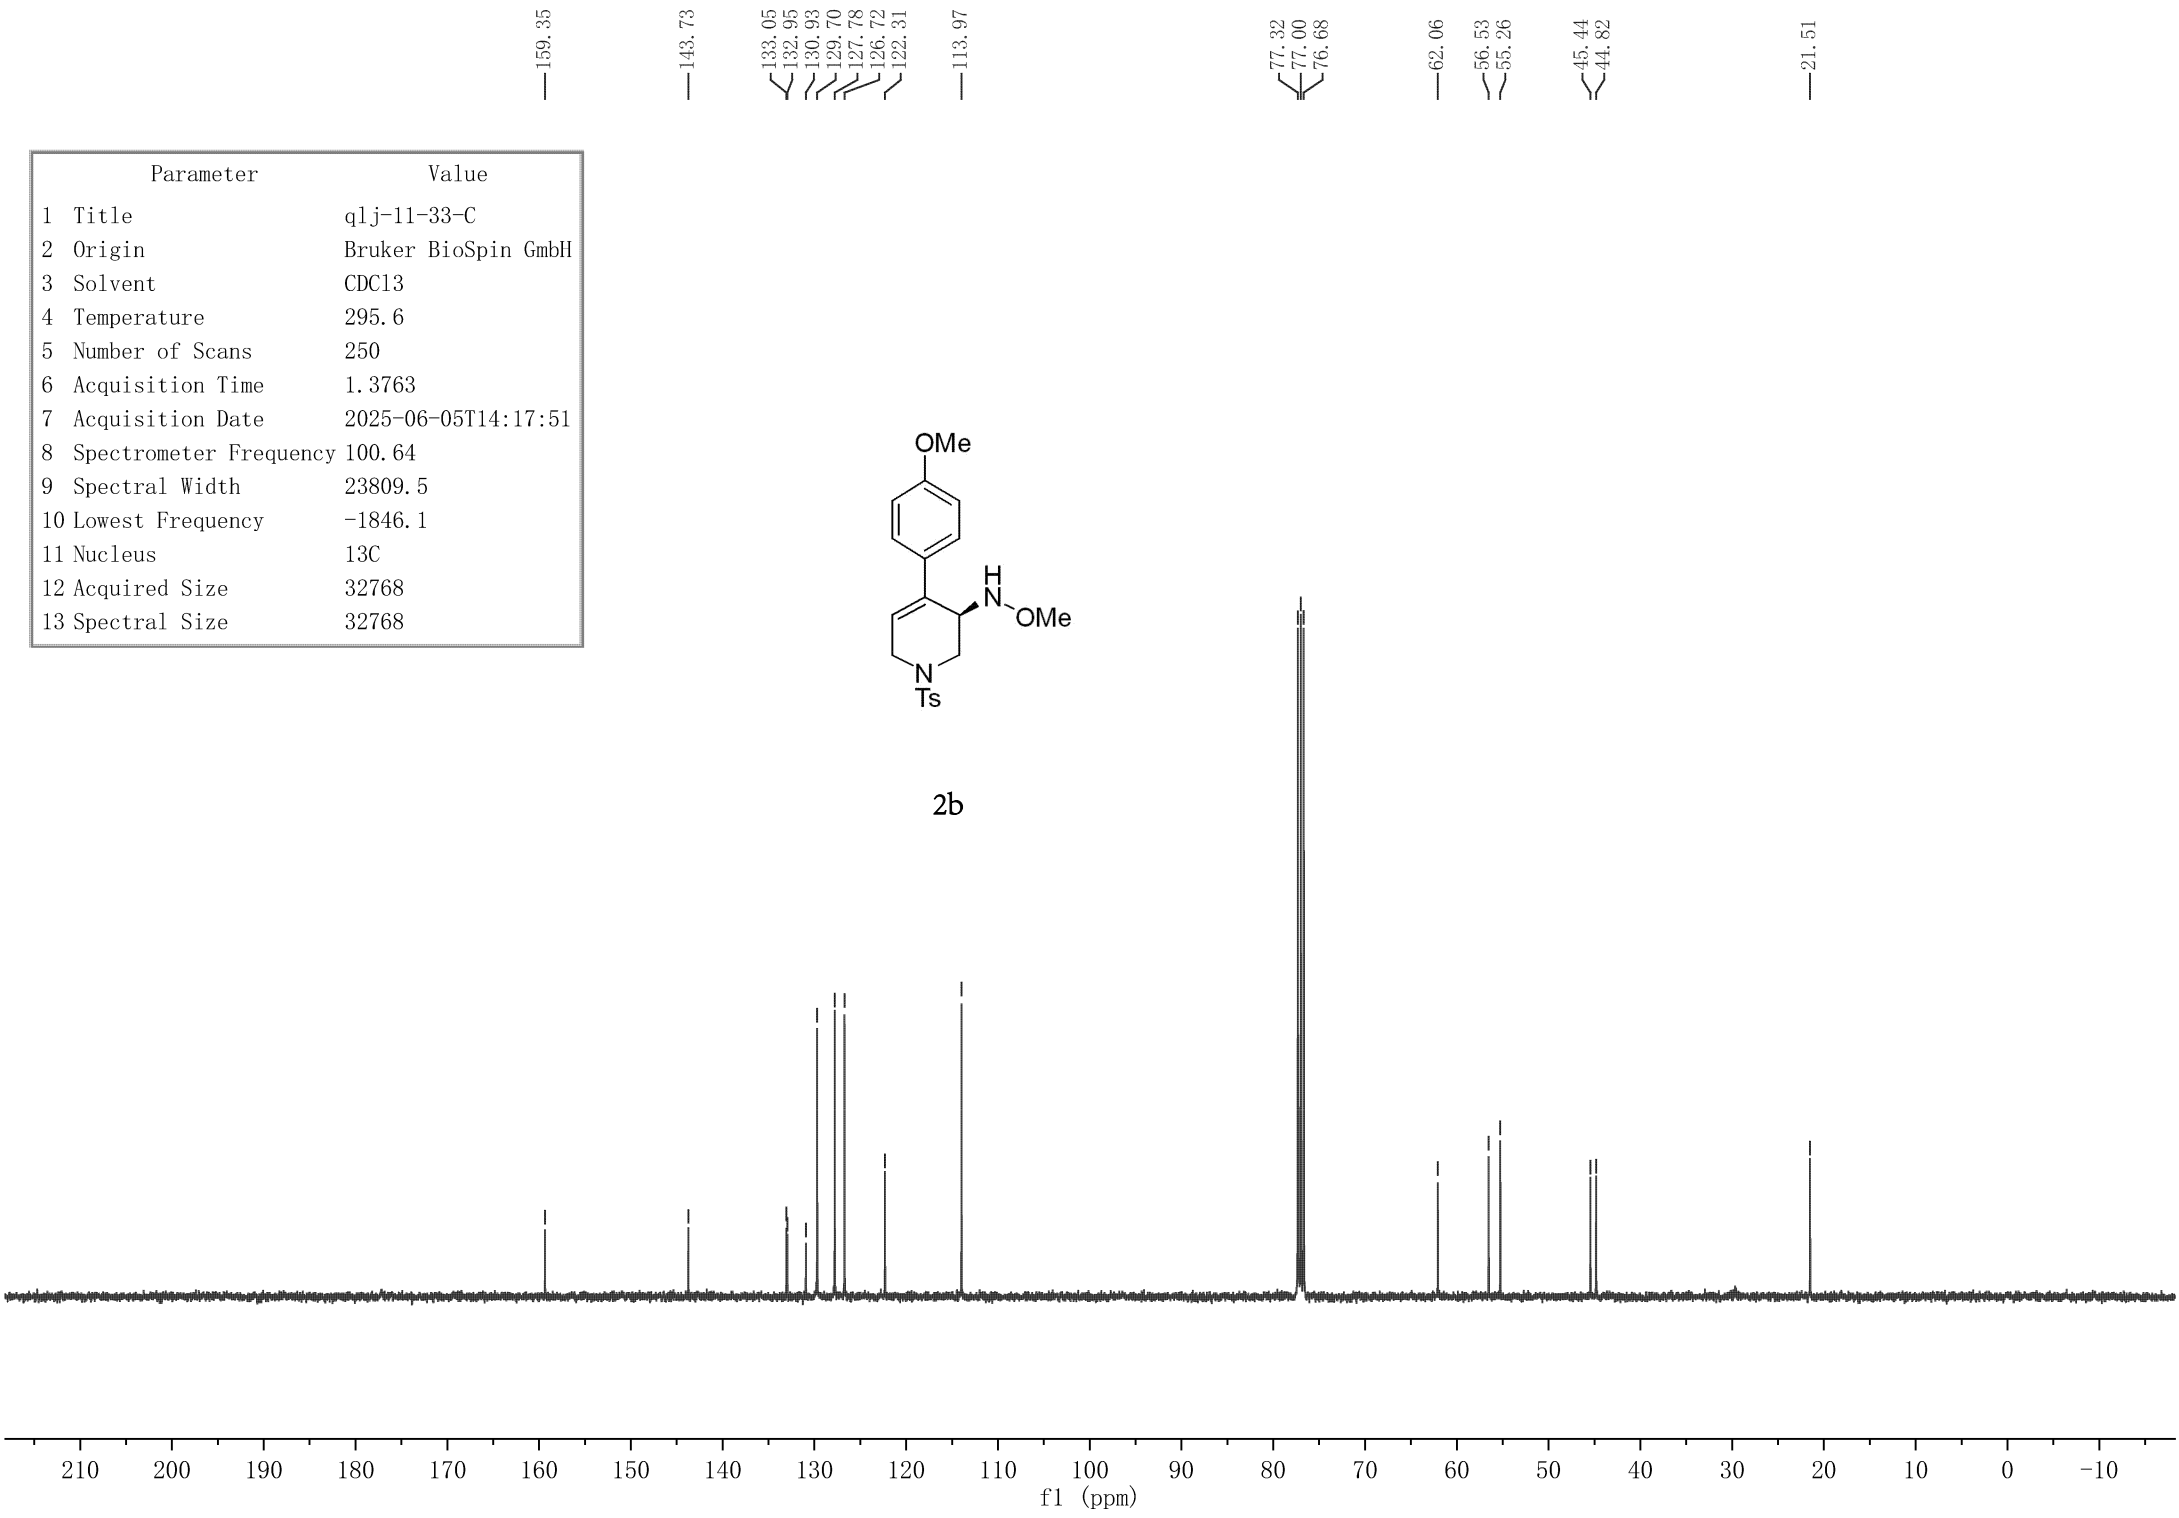

| Parameter                | Value               |
|--------------------------|---------------------|
| 1 Title                  | qlj-11-34-3-H       |
| 2 Origin                 | Bruker BioSpin GmbH |
| 3 Solvent                | CDC13               |
| 4 Temperature            | 296.2               |
| 5 Number of Scans        | 16                  |
| 6 Acquisition Time       | 3.9977              |
| 7 Acquisition Date       | 2025-06-09T16:24:41 |
| 8 Spectrometer Frequency | 400.25              |
| 9 Spectral Width         | 8196.7              |
| 10 Lowest Frequency      | -1699.5             |
| 11 Nucleus               | <sup>1</sup> H      |
| 12 Acquired Size         | 32768               |
| 13 Spectral Size         | 65536               |

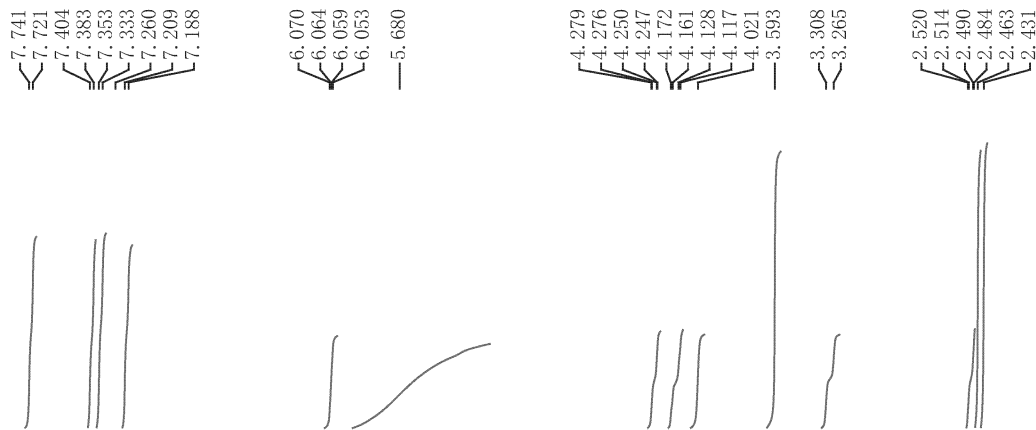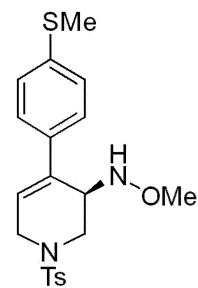

2c

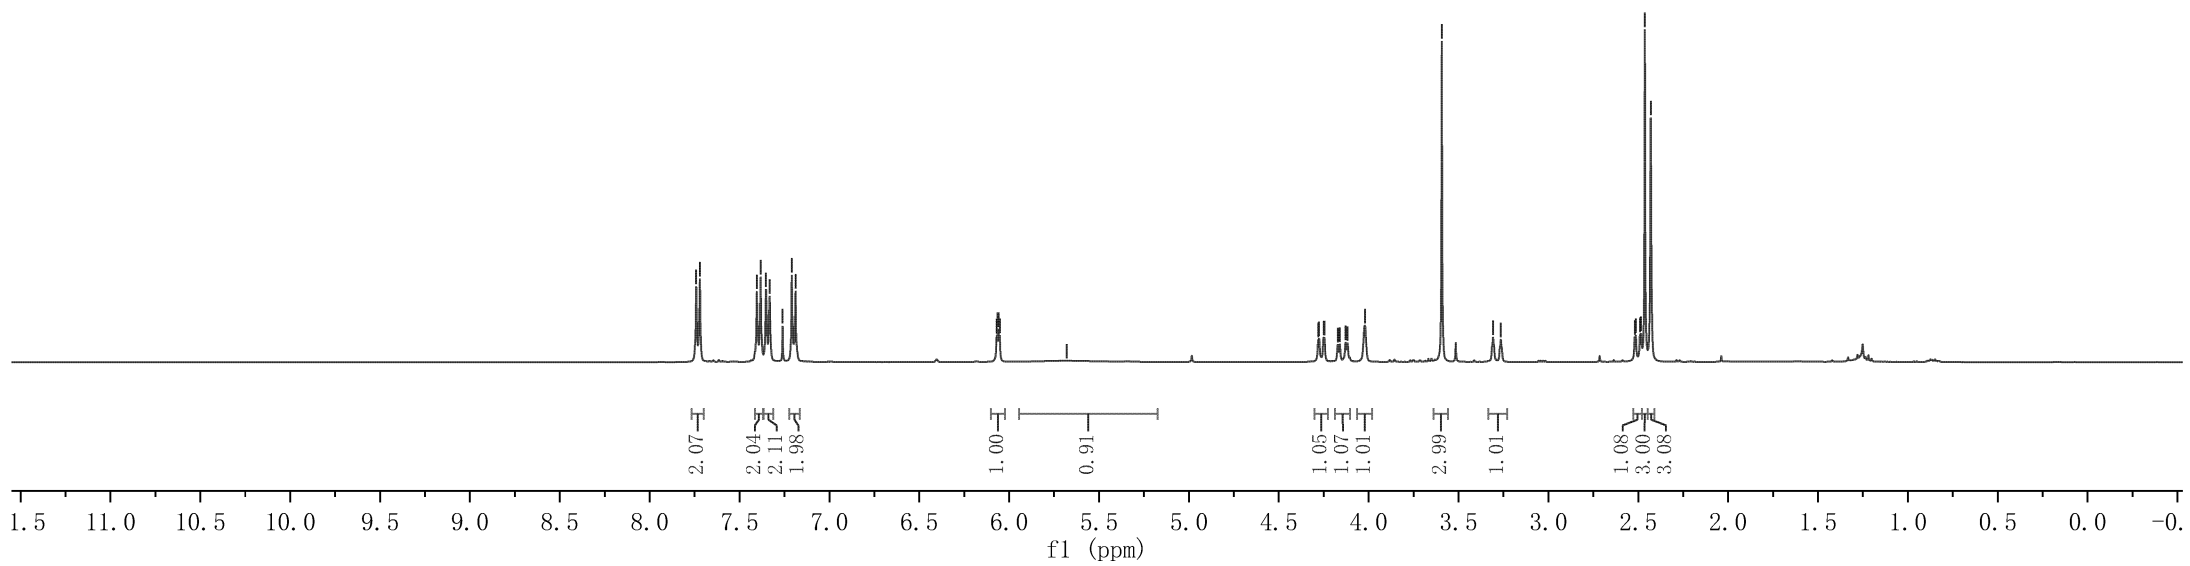

| Parameter                | Value               |
|--------------------------|---------------------|
| 1 Title                  | qlj-11-34-3-C       |
| 2 Origin                 | Bruker BioSpin GmbH |
| 3 Solvent                | CDC13               |
| 4 Temperature            | 296.9               |
| 5 Number of Scans        | 141                 |
| 6 Acquisition Time       | 1.3763              |
| 7 Acquisition Date       | 2025-06-09T16:33:08 |
| 8 Spectrometer Frequency | 100.64              |
| 9 Spectral Width         | 23809.5             |
| 10 Lowest Frequency      | -1849.8             |
| 11 Nucleus               | 13C                 |
| 12 Acquired Size         | 32768               |
| 13 Spectral Size         | 32768               |

143.77  
138.26  
135.14  
133.05  
132.86  
129.69  
127.73  
126.47  
123.91  
123.40

77.32  
77.00  
76.68

61.97  
56.32

45.42  
44.73

21.47  
15.60

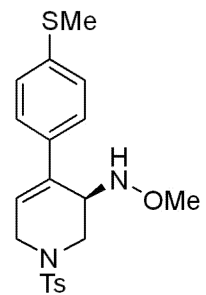

2c

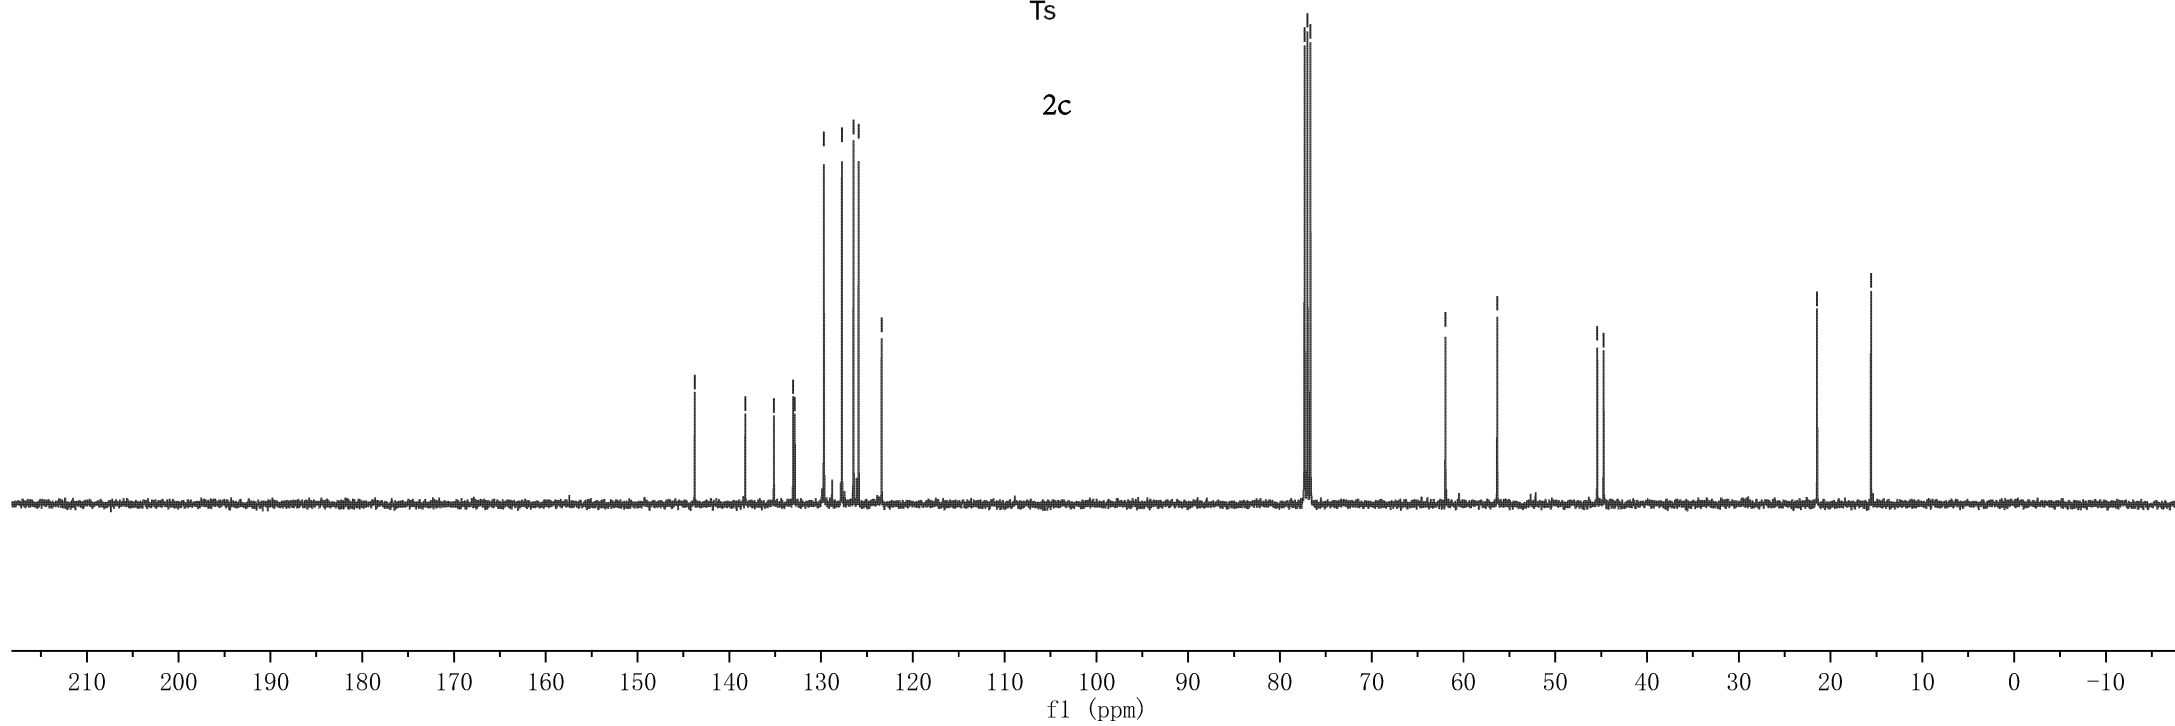

| Parameter                | Value               |
|--------------------------|---------------------|
| 1 Title                  | qlj-11-34-2-H       |
| 2 Origin                 | Bruker BioSpin GmbH |
| 3 Solvent                | CDC13               |
| 4 Temperature            | 296.4               |
| 5 Number of Scans        | 16                  |
| 6 Acquisition Time       | 3.9977              |
| 7 Acquisition Date       | 2025-06-09T15:40:30 |
| 8 Spectrometer Frequency | 400.25              |
| 9 Spectral Width         | 8196.7              |
| 10 Lowest Frequency      | -1703.0             |
| 11 Nucleus               | <sup>1</sup> H      |
| 12 Acquired Size         | 32768               |
| 13 Spectral Size         | 65536               |

7.755 7.735 7.426 7.406 7.363 7.342 7.260  
6.082 6.077 6.071 5.735  
4.291 4.262 4.187 4.176 4.144 4.133 4.074 3.620 3.318 3.275  
2.527 2.523 2.498 2.494 2.438  
1.307

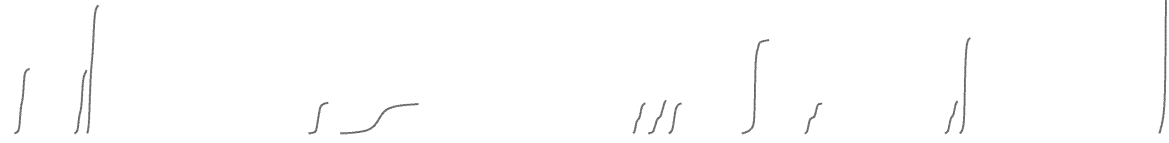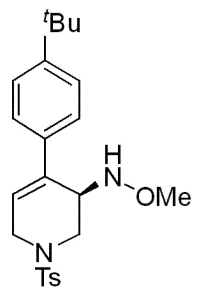

2d

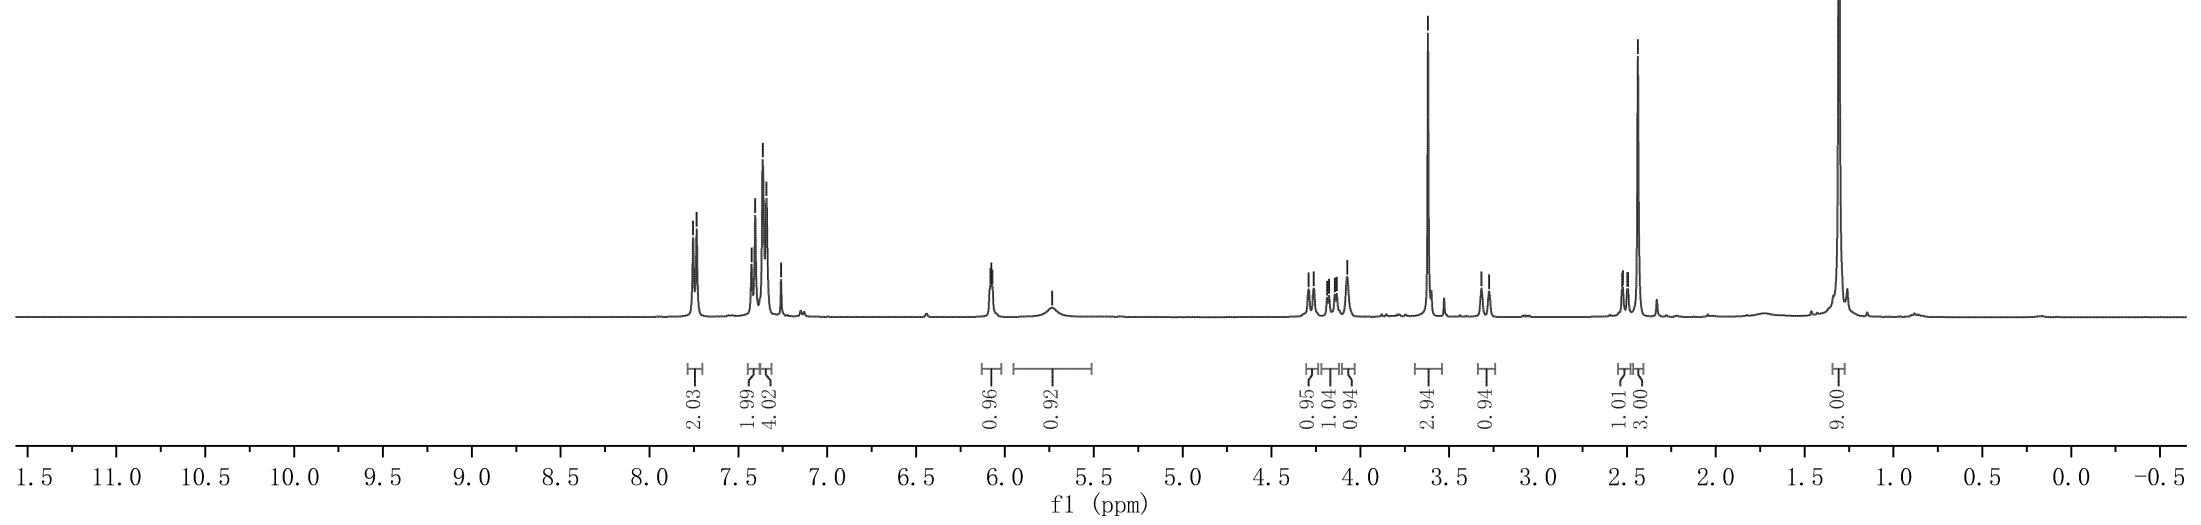

| Parameter                | Value               |
|--------------------------|---------------------|
| 1 Title                  | qlj-11-34-2-C       |
| 2 Origin                 | Bruker BioSpin GmbH |
| 3 Solvent                | CDC13               |
| 4 Temperature            | 296.7               |
| 5 Number of Scans        | 105                 |
| 6 Acquisition Time       | 1.3763              |
| 7 Acquisition Date       | 2025-06-09T15:46:53 |
| 8 Spectrometer Frequency | 100.64              |
| 9 Spectral Width         | 23809.5             |
| 10 Lowest Frequency      | -1848.3             |
| 11 Nucleus               | <sup>13</sup> C     |
| 12 Acquired Size         | 32768               |
| 13 Spectral Size         | 32768               |

150.93 — 143.73 — 135.34 133.30 132.95 129.70 127.76 125.54 125.15 123.21 — 77.32 77.00 76.68 — 62.04 — 56.37 — 45.46 44.82 — 34.47 — 31.20 — 21.49

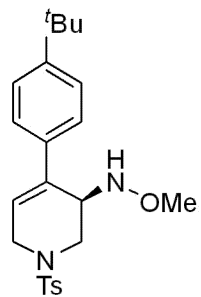

2d

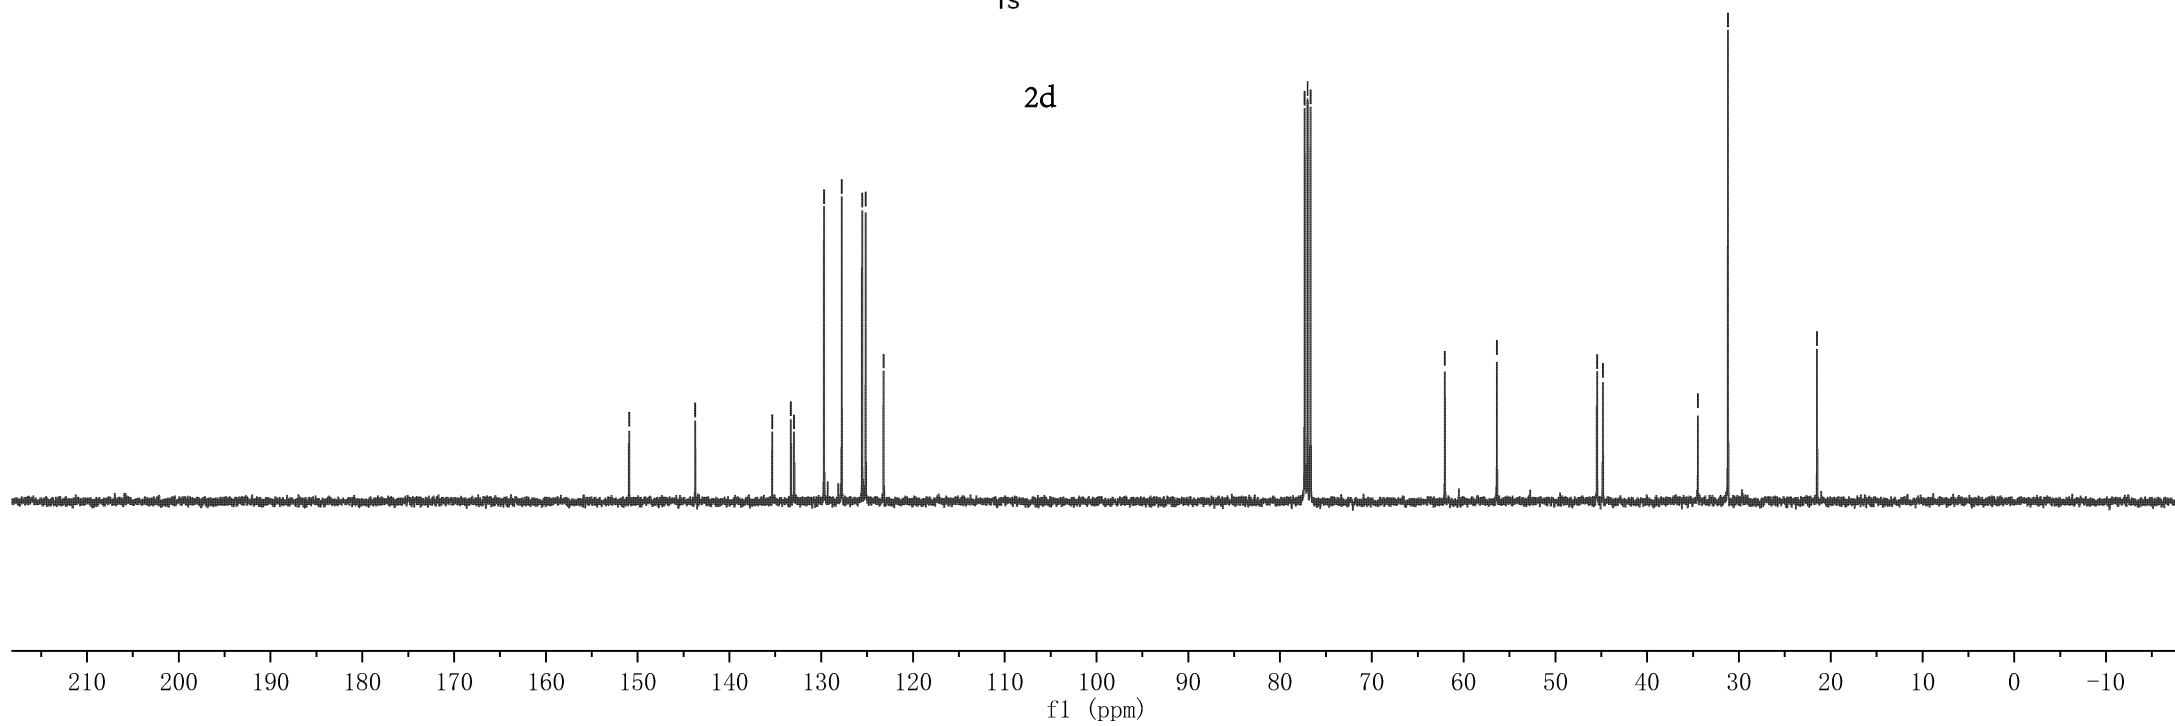

| Parameter                | Value               |
|--------------------------|---------------------|
| 1 Title                  | qlj-11-34-1-H       |
| 2 Origin                 | Bruker BioSpin GmbH |
| 3 Solvent                | CDC13               |
| 4 Temperature            | 296.3               |
| 5 Number of Scans        | 16                  |
| 6 Acquisition Time       | 3.9977              |
| 7 Acquisition Date       | 2025-06-09T15:21:09 |
| 8 Spectrometer Frequency | 400.25              |
| 9 Spectral Width         | 8196.7              |
| 10 Lowest Frequency      | -1636.5             |
| 11 Nucleus               | <sup>1</sup> H      |
| 12 Acquired Size         | 32768               |
| 13 Spectral Size         | 65536               |

7.751 7.731 7.358 7.342 7.260 7.148 7.128  
6.055 6.049 6.045 6.039 5.715  
4.270 4.268 4.241 4.238 4.169 4.158 4.126 4.115 4.053 3.599 3.319 3.276  
2.545 2.540 2.516 2.510 2.436 2.331

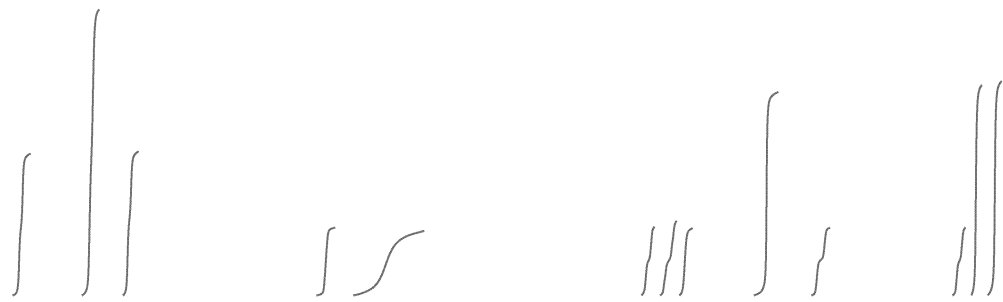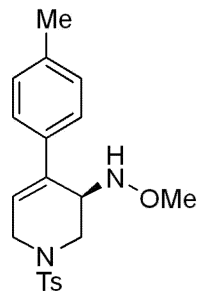

2e

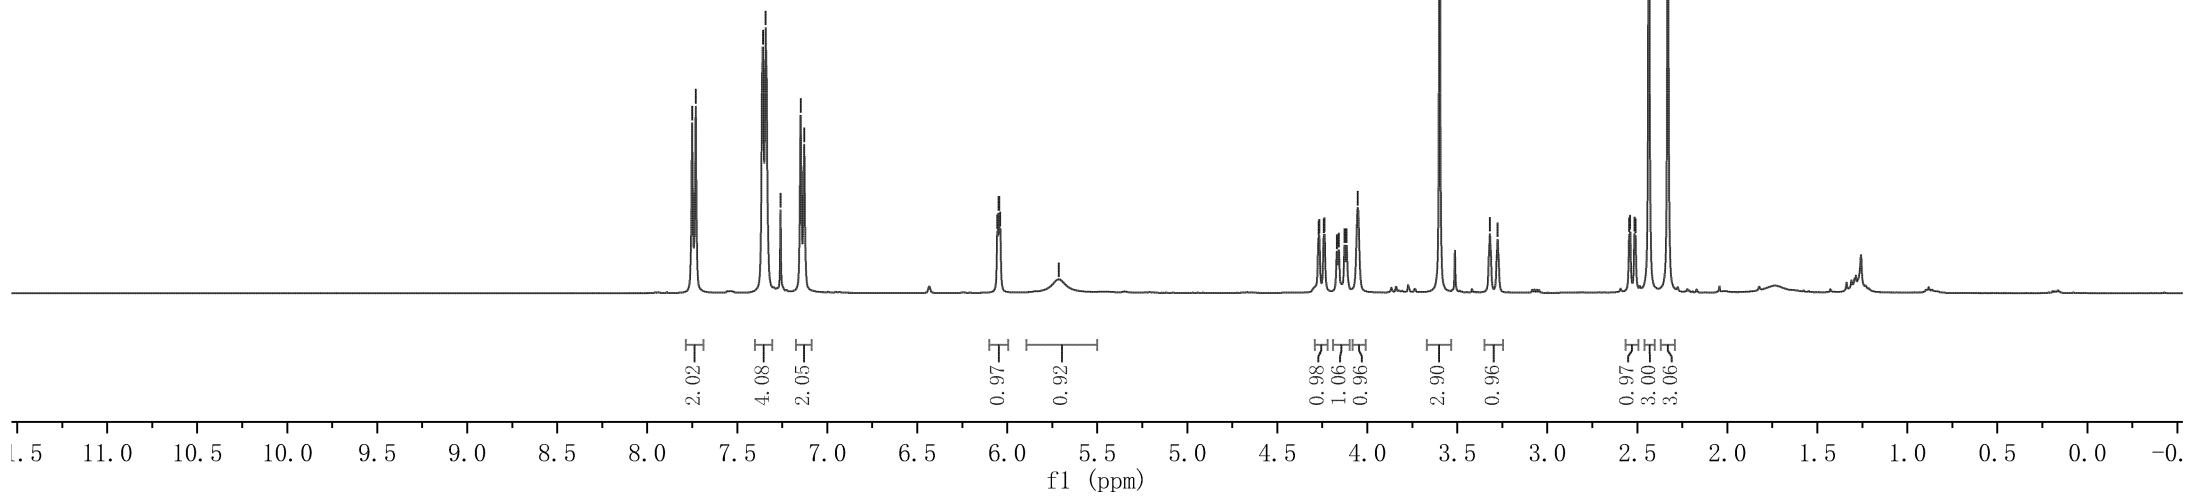

| Parameter                | Value               |
|--------------------------|---------------------|
| 1 Title                  | qlj-11-34-1-C       |
| 2 Origin                 | Bruker BioSpin GmbH |
| 3 Solvent                | CDC13               |
| 4 Temperature            | 297.0               |
| 5 Number of Scans        | 217                 |
| 6 Acquisition Time       | 1.3763              |
| 7 Acquisition Date       | 2025-06-09T15:35:07 |
| 8 Spectrometer Frequency | 100.64              |
| 9 Spectral Width         | 23809.5             |
| 10 Lowest Frequency      | -1848.3             |
| 11 Nucleus               | 13C                 |
| 12 Acquired Size         | 32768               |
| 13 Spectral Size         | 32768               |

143.73  
137.73  
135.51  
133.51  
132.94  
129.69  
129.30  
127.76  
125.42  
123.15

77.32  
77.00  
76.68

62.03  
56.43

45.44  
44.85

21.48  
21.04

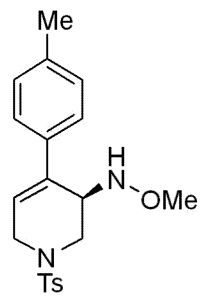

2e

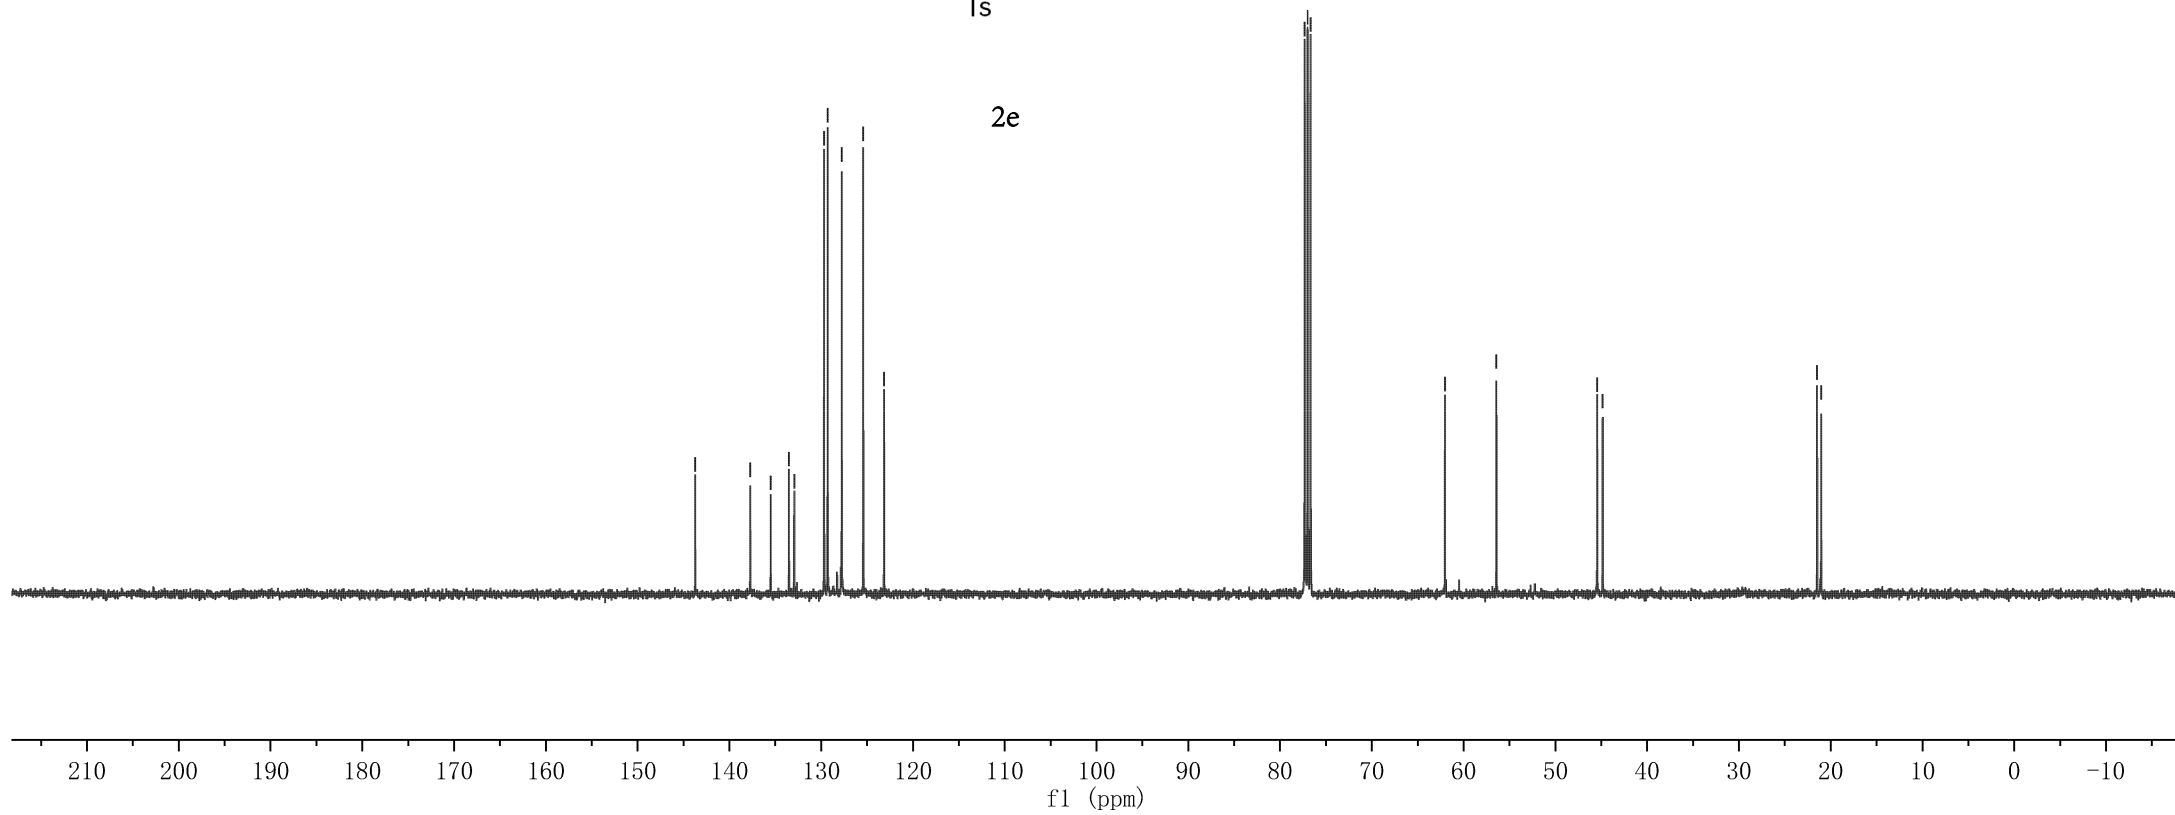

| Parameter                | Value               |
|--------------------------|---------------------|
| 1 Title                  | qlj-11-36-1-H;      |
| 2 Origin                 | Bruker BioSpin GmbH |
| 3 Solvent                | CDC13               |
| 4 Temperature            | 295.0               |
| 5 Number of Scans        | 16                  |
| 6 Acquisition Time       | 3.9977              |
| 7 Acquisition Date       | 2025-06-13T16:29:06 |
| 8 Spectrometer Frequency | 400.25              |
| 9 Spectral Width         | 8196.7              |
| 10 Lowest Frequency      | -1636.4             |
| 11 Nucleus               | <sup>1</sup> H      |
| 12 Acquired Size         | 32768               |
| 13 Spectral Size         | 65536               |

7.738 7.718 7.465 7.452 7.443 7.430 7.355 7.335 7.260 7.026 7.004 6.983 6.033 6.026 6.022 6.016 5.717 4.283 4.280 4.254 4.250 4.170 4.159 4.127 4.116 3.987 3.585 3.298 3.255 2.515 2.509 2.485 2.479 2.431

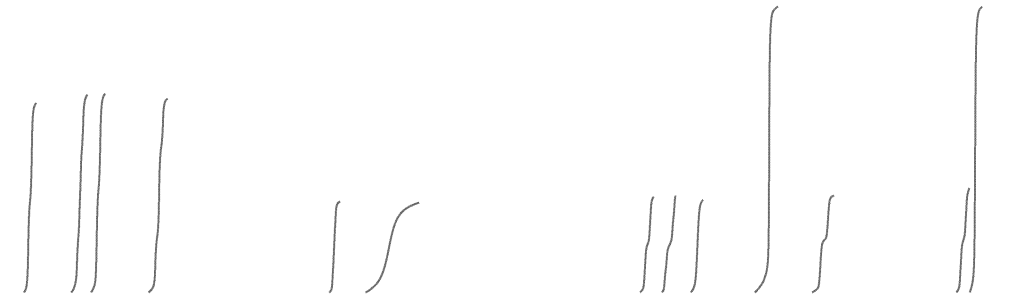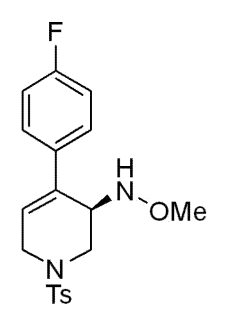

2f

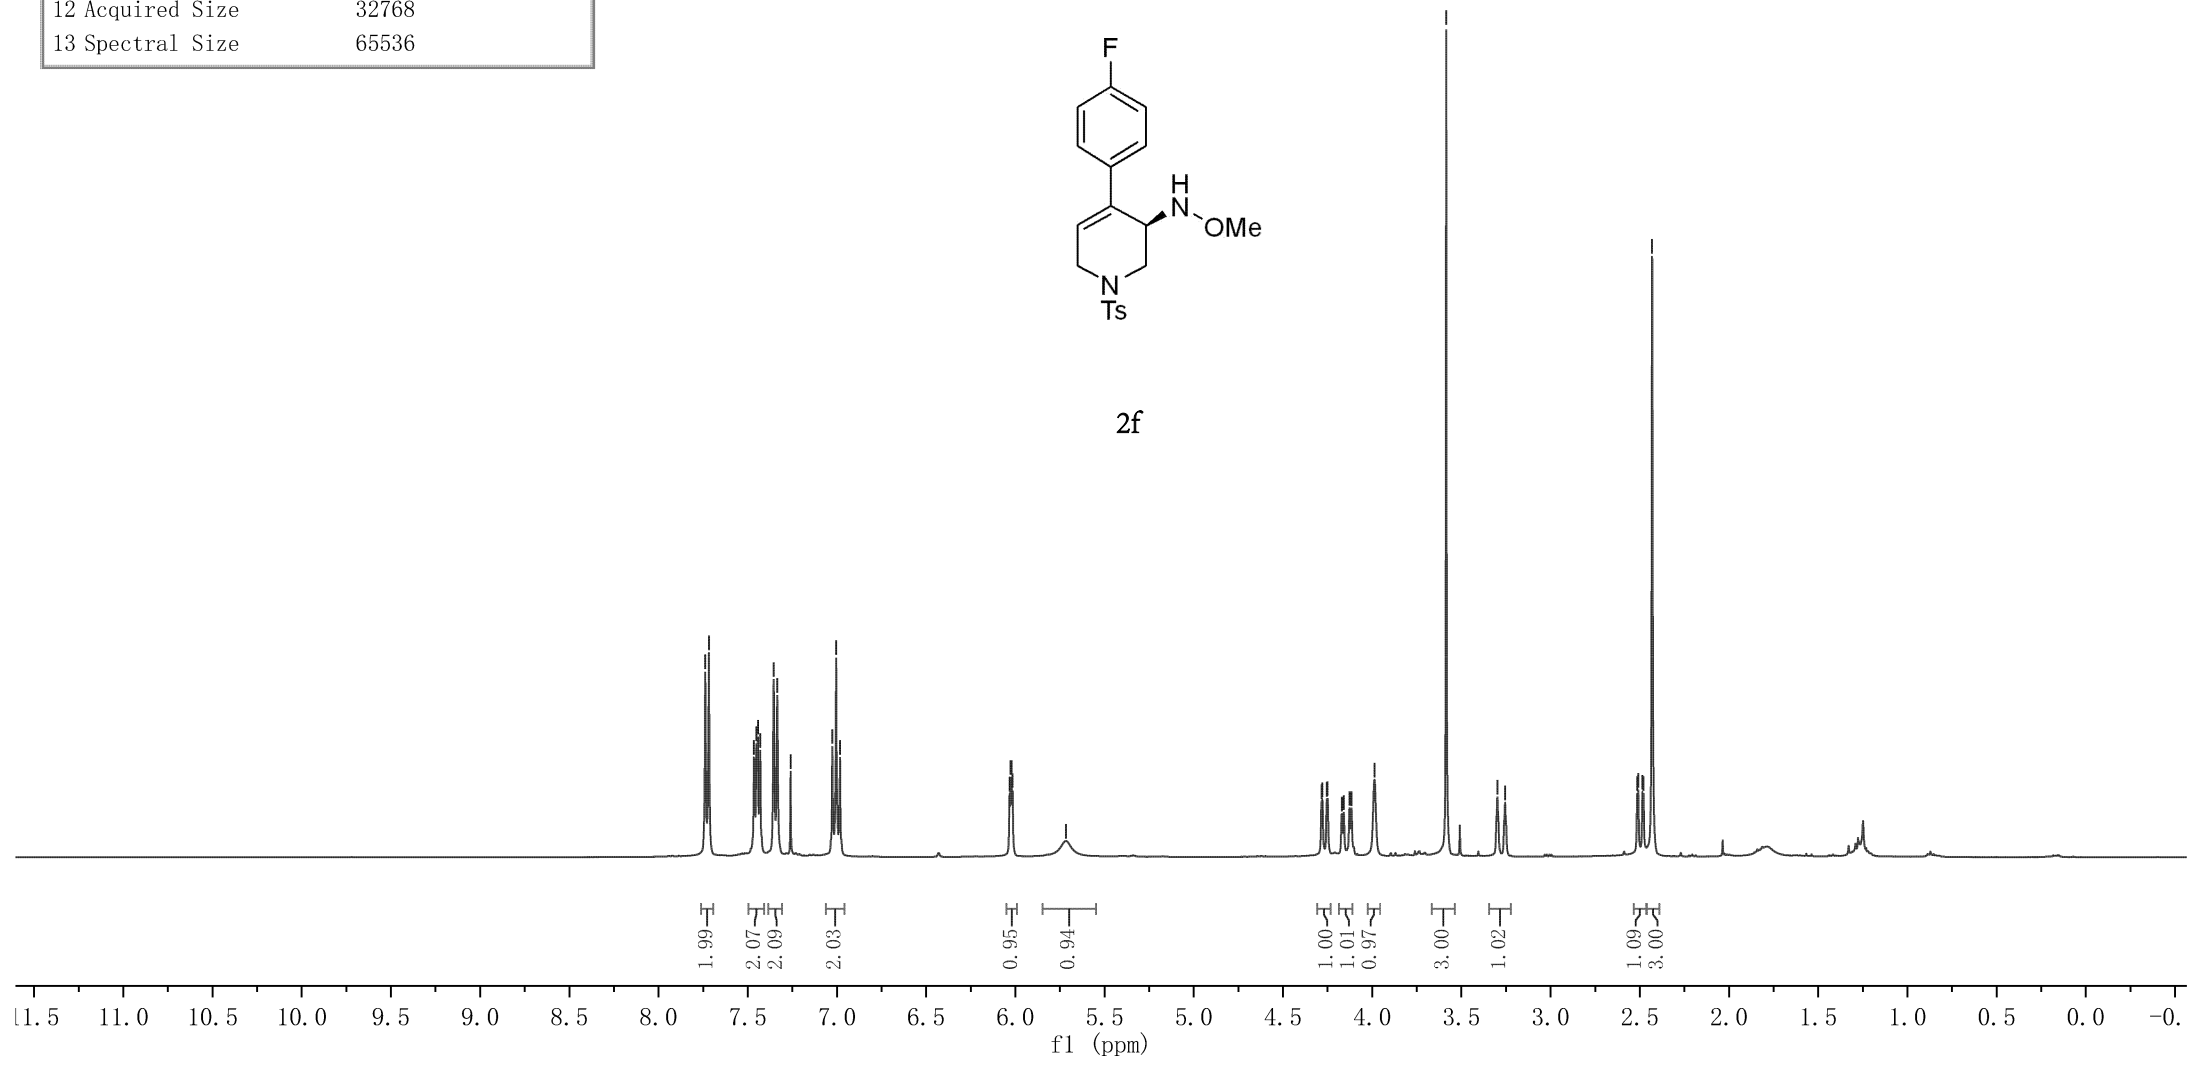

163.63  
161.17

143.83  
134.74  
134.70  
132.87  
129.72  
127.72  
127.35  
127.27  
123.93  
115.50  
115.29

77.32  
77.00  
76.68

61.91  
56.59

45.36  
44.68

21.47

| Parameter                | Value               |
|--------------------------|---------------------|
| 1 Title                  | qlj-11-36-1-C;      |
| 2 Origin                 | Bruker BioSpin GmbH |
| 3 Solvent                | CDC13               |
| 4 Temperature            | 295.8               |
| 5 Number of Scans        | 451                 |
| 6 Acquisition Time       | 1.3763              |
| 7 Acquisition Date       | 2025-06-13T16:55:18 |
| 8 Spectrometer Frequency | 100.64              |
| 9 Spectral Width         | 23809.5             |
| 10 Lowest Frequency      | -1849.3             |
| 11 Nucleus               | 13C                 |
| 12 Acquired Size         | 32768               |
| 13 Spectral Size         | 32768               |

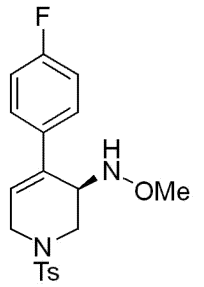

2f

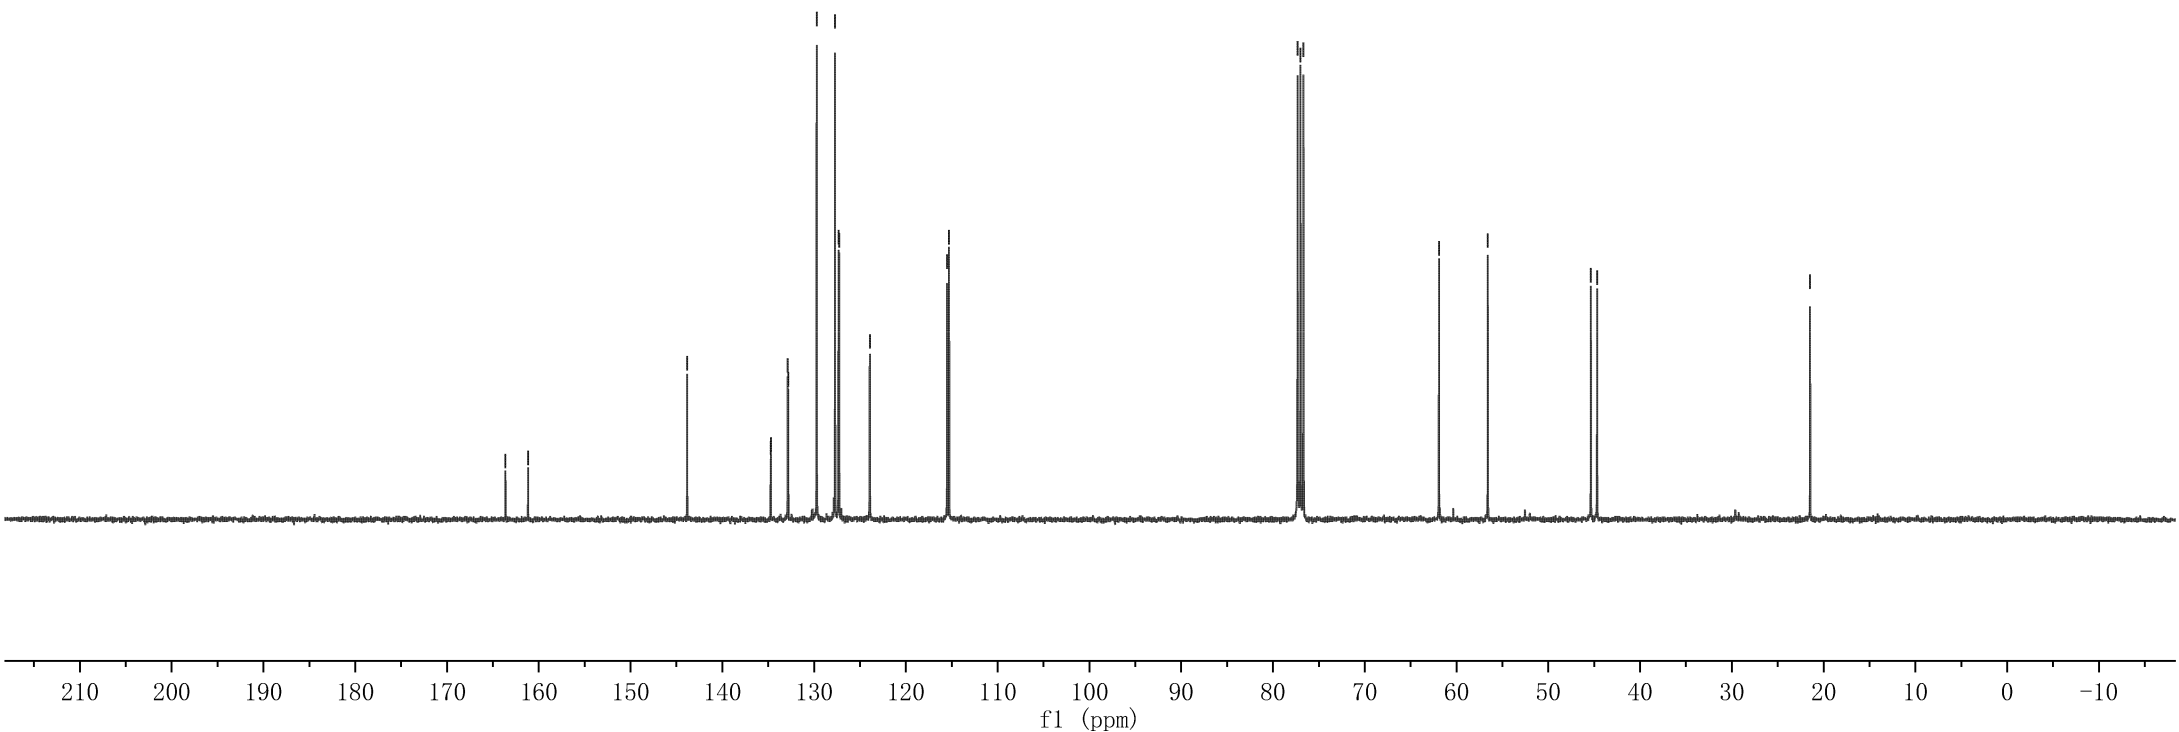

| Parameter                | Value               |
|--------------------------|---------------------|
| 1 Title                  | qlj-11-35-2-H       |
| 2 Origin                 | Bruker BioSpin GmbH |
| 3 Solvent                | CDC13               |
| 4 Temperature            | 295.4               |
| 5 Number of Scans        | 16                  |
| 6 Acquisition Time       | 3.9977              |
| 7 Acquisition Date       | 2025-06-10T12:53:49 |
| 8 Spectrometer Frequency | 400.25              |
| 9 Spectral Width         | 8196.7              |
| 10 Lowest Frequency      | -1699.7             |
| 11 Nucleus               | <sup>1</sup> H      |
| 12 Acquired Size         | 32768               |
| 13 Spectral Size         | 65536               |

7.739 7.718 7.424 7.402 7.355 7.335 7.296 7.275 7.260  
6.081 6.075 6.070 6.064 5.708  
4.287 4.284 4.257 4.254 4.177 4.166 4.134 4.123 3.987 3.581 3.304 3.260  
2.513 2.507 2.483 2.478 2.432

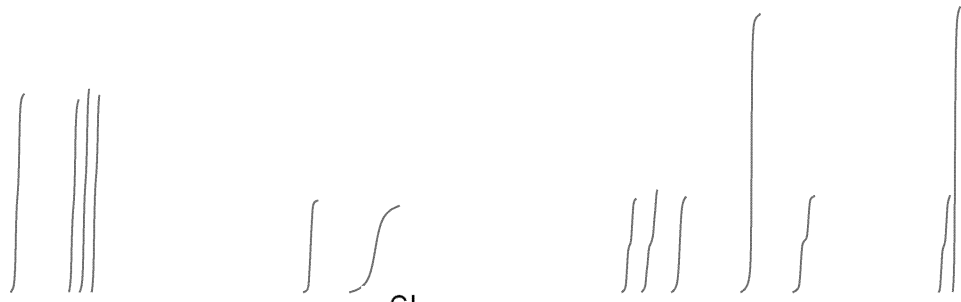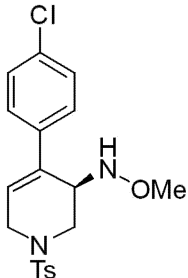

2g

2.08 2.02 2.14 2.07 0.96 0.91 0.98 1.08 1.01 2.92 1.01 1.02 3.00

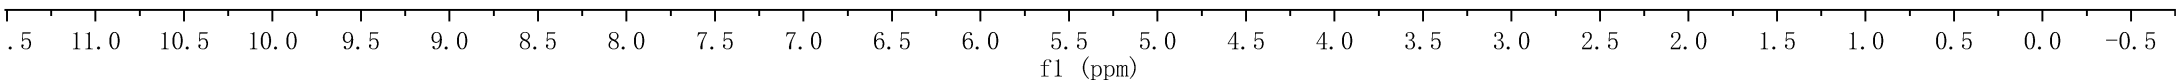

| Parameter                | Value               |
|--------------------------|---------------------|
| 1 Title                  | qlj-11-35-2-C       |
| 2 Origin                 | Bruker BioSpin GmbH |
| 3 Solvent                | CDC13               |
| 4 Temperature            | 296.1               |
| 5 Number of Scans        | 250                 |
| 6 Acquisition Time       | 1.3763              |
| 7 Acquisition Date       | 2025-06-10T13:09:06 |
| 8 Spectrometer Frequency | 100.64              |
| 9 Spectral Width         | 23809.5             |
| 10 Lowest Frequency      | -1848.3             |
| 11 Nucleus               | 13C                 |
| 12 Acquired Size         | 32768               |
| 13 Spectral Size         | 32768               |

143.85  
137.07  
133.64  
132.85  
132.83  
129.73  
128.69  
127.73  
126.93  
124.49

77.32  
77.00  
76.68

61.92  
56.42

45.39  
44.66

21.49

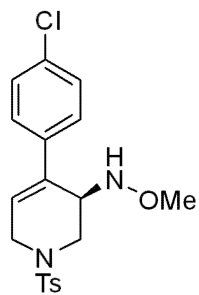

2g

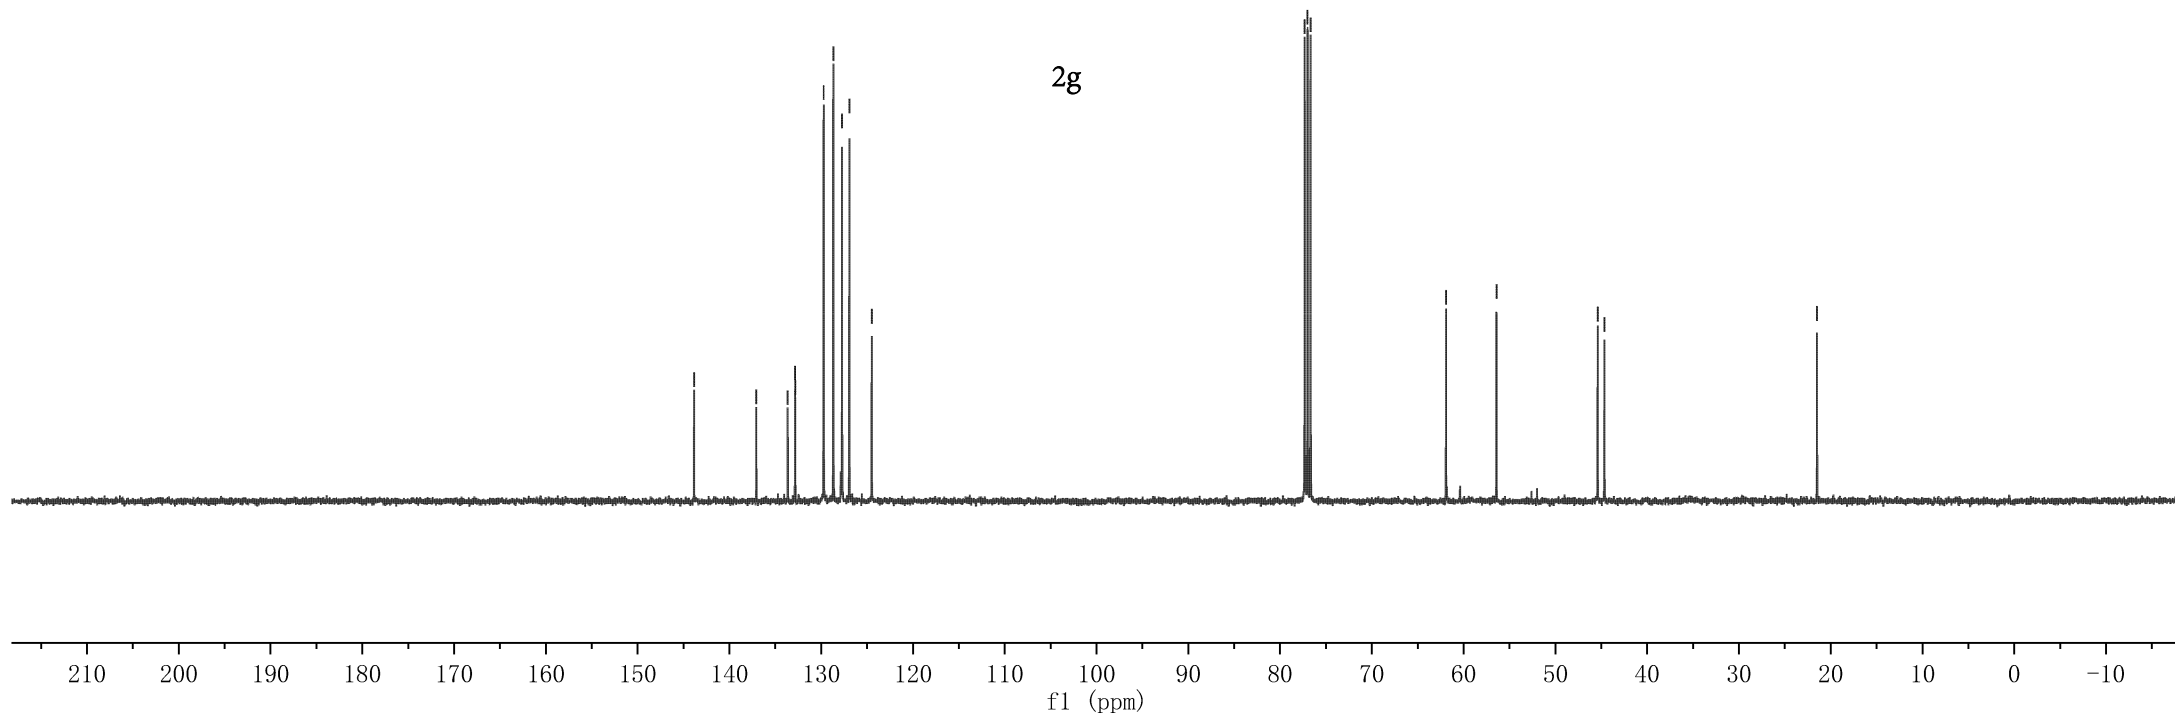

| Parameter                | Value               |
|--------------------------|---------------------|
| 1 Title                  | qlj-11-36-2-H       |
| 2 Origin                 | Bruker BioSpin GmbH |
| 3 Solvent                | CDC13               |
| 4 Temperature            | 294.9               |
| 5 Number of Scans        | 16                  |
| 6 Acquisition Time       | 3.9977              |
| 7 Acquisition Date       | 2025-06-13T16:08:22 |
| 8 Spectrometer Frequency | 400.25              |
| 9 Spectral Width         | 8196.7              |
| 10 Lowest Frequency      | -1699.1             |
| 11 Nucleus               | <sup>1</sup> H      |
| 12 Acquired Size         | 32768               |
| 13 Spectral Size         | 65536               |

7.734 7.714 7.448 7.427 7.357 7.336 7.260  
6.088 6.082 6.077 6.071 5.704  
4.282 4.279 4.253 4.250 4.167 4.156 4.123 4.112 3.982 3.577 3.291 3.248  
2.507 2.502 2.478 2.472 2.430

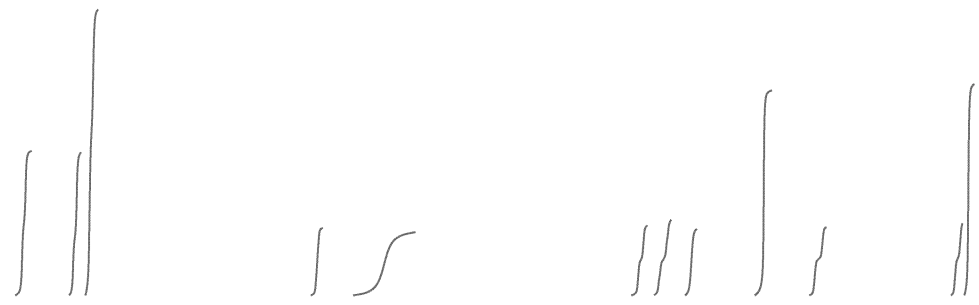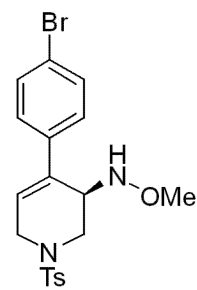

2h

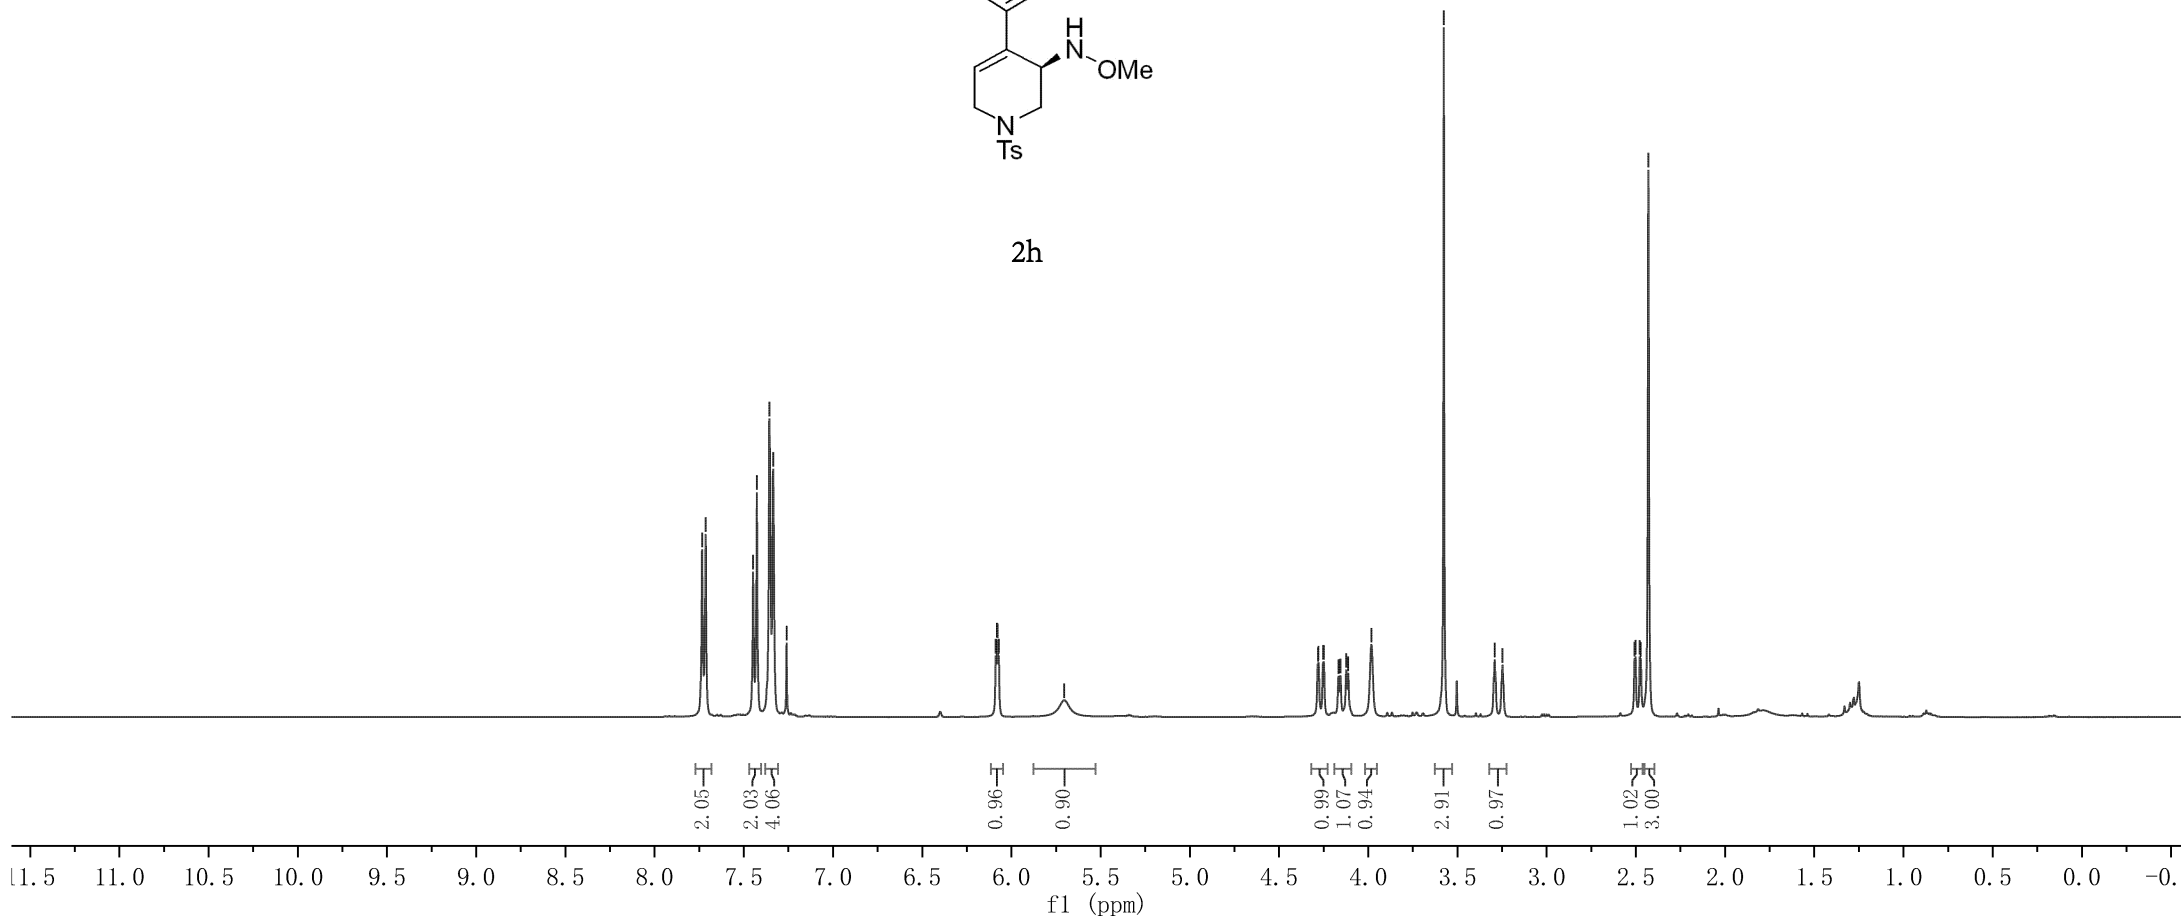

| Parameter                | Value               |
|--------------------------|---------------------|
| 1 Title                  | qlj-11-36-2-C       |
| 2 Origin                 | Bruker BioSpin GmbH |
| 3 Solvent                | CDC13               |
| 4 Temperature            | 295.7               |
| 5 Number of Scans        | 250                 |
| 6 Acquisition Time       | 1.3763              |
| 7 Acquisition Date       | 2025-06-13T16:24:01 |
| 8 Spectrometer Frequency | 100.64              |
| 9 Spectral Width         | 23809.5             |
| 10 Lowest Frequency      | -1850.3             |
| 11 Nucleus               | <sup>13</sup> C     |
| 12 Acquired Size         | 32768               |
| 13 Spectral Size         | 32768               |

143.85  
 137.52  
 132.87  
 132.77  
 131.62  
 129.73  
 127.70  
 127.25  
 124.56  
 121.80  
 77.32  
 77.00  
 76.68  
 61.90  
 56.34  
 45.39  
 44.63  
 21.48

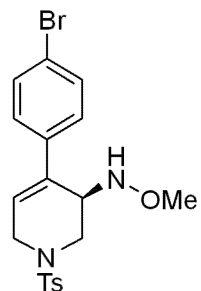

2h

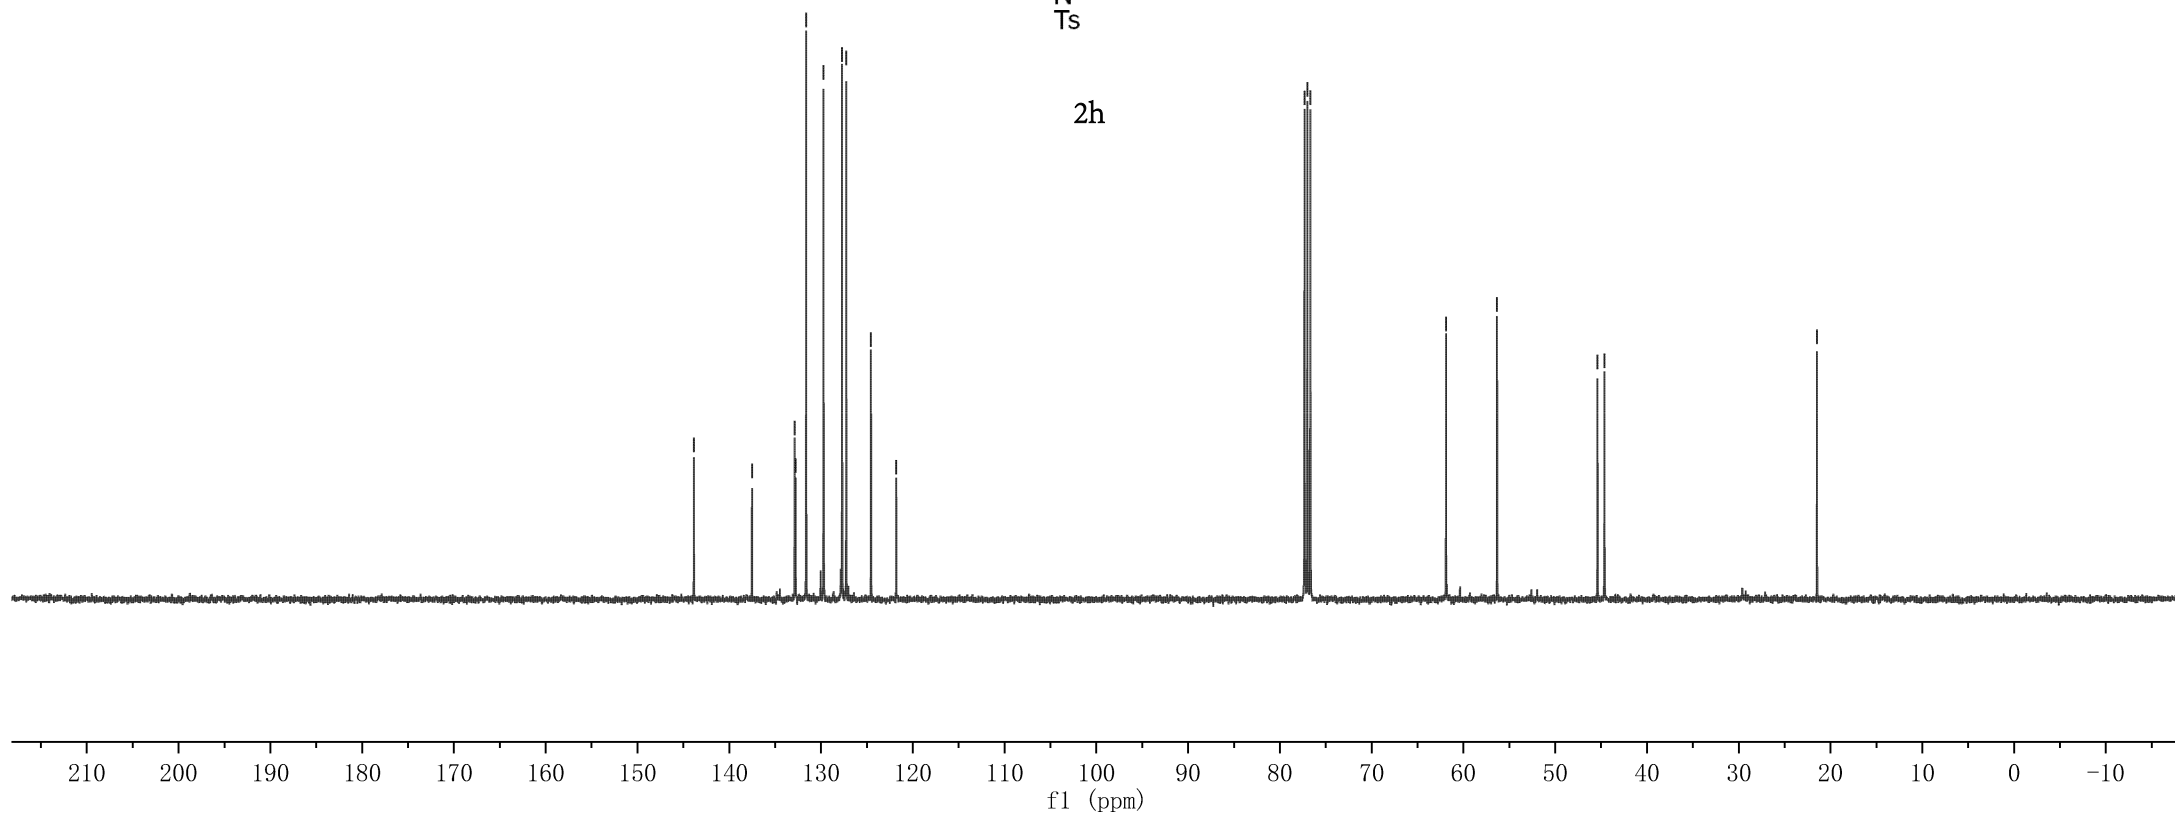

| Parameter                | Value               |
|--------------------------|---------------------|
| 1 Title                  | qlj-11-36-3-H       |
| 2 Origin                 | Bruker BioSpin GmbH |
| 3 Solvent                | CDC13               |
| 4 Temperature            | 295.2               |
| 5 Number of Scans        | 16                  |
| 6 Acquisition Time       | 3.9977              |
| 7 Acquisition Date       | 2025-06-14T16:29:41 |
| 8 Spectrometer Frequency | 400.25              |
| 9 Spectral Width         | 8196.7              |
| 10 Lowest Frequency      | -1702.2             |
| 11 Nucleus               | <sup>1</sup> H      |
| 12 Acquired Size         | 32768               |
| 13 Spectral Size         | 65536               |

7.749 7.728 7.356 7.336 7.260 7.256 7.243 7.233 7.215 7.194 7.100 7.083 6.069 6.063 6.059 6.053 5.717 4.264 4.260 4.235 4.231 4.168 4.158 4.125 4.114 4.059 3.599 3.321 3.278 2.551 2.545 2.521 2.515 2.433 2.334

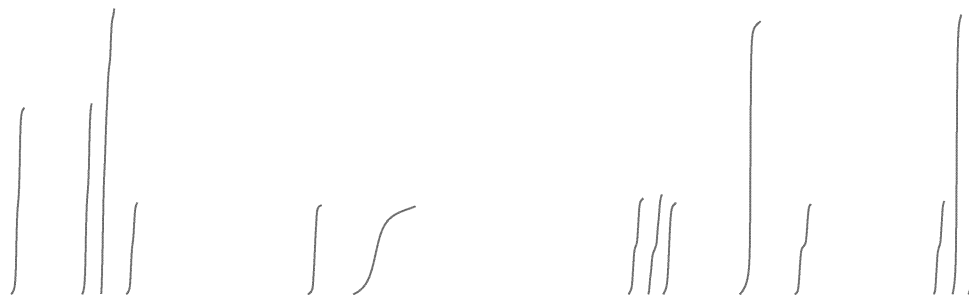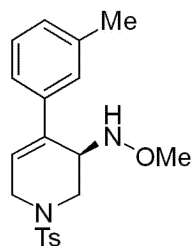

2i

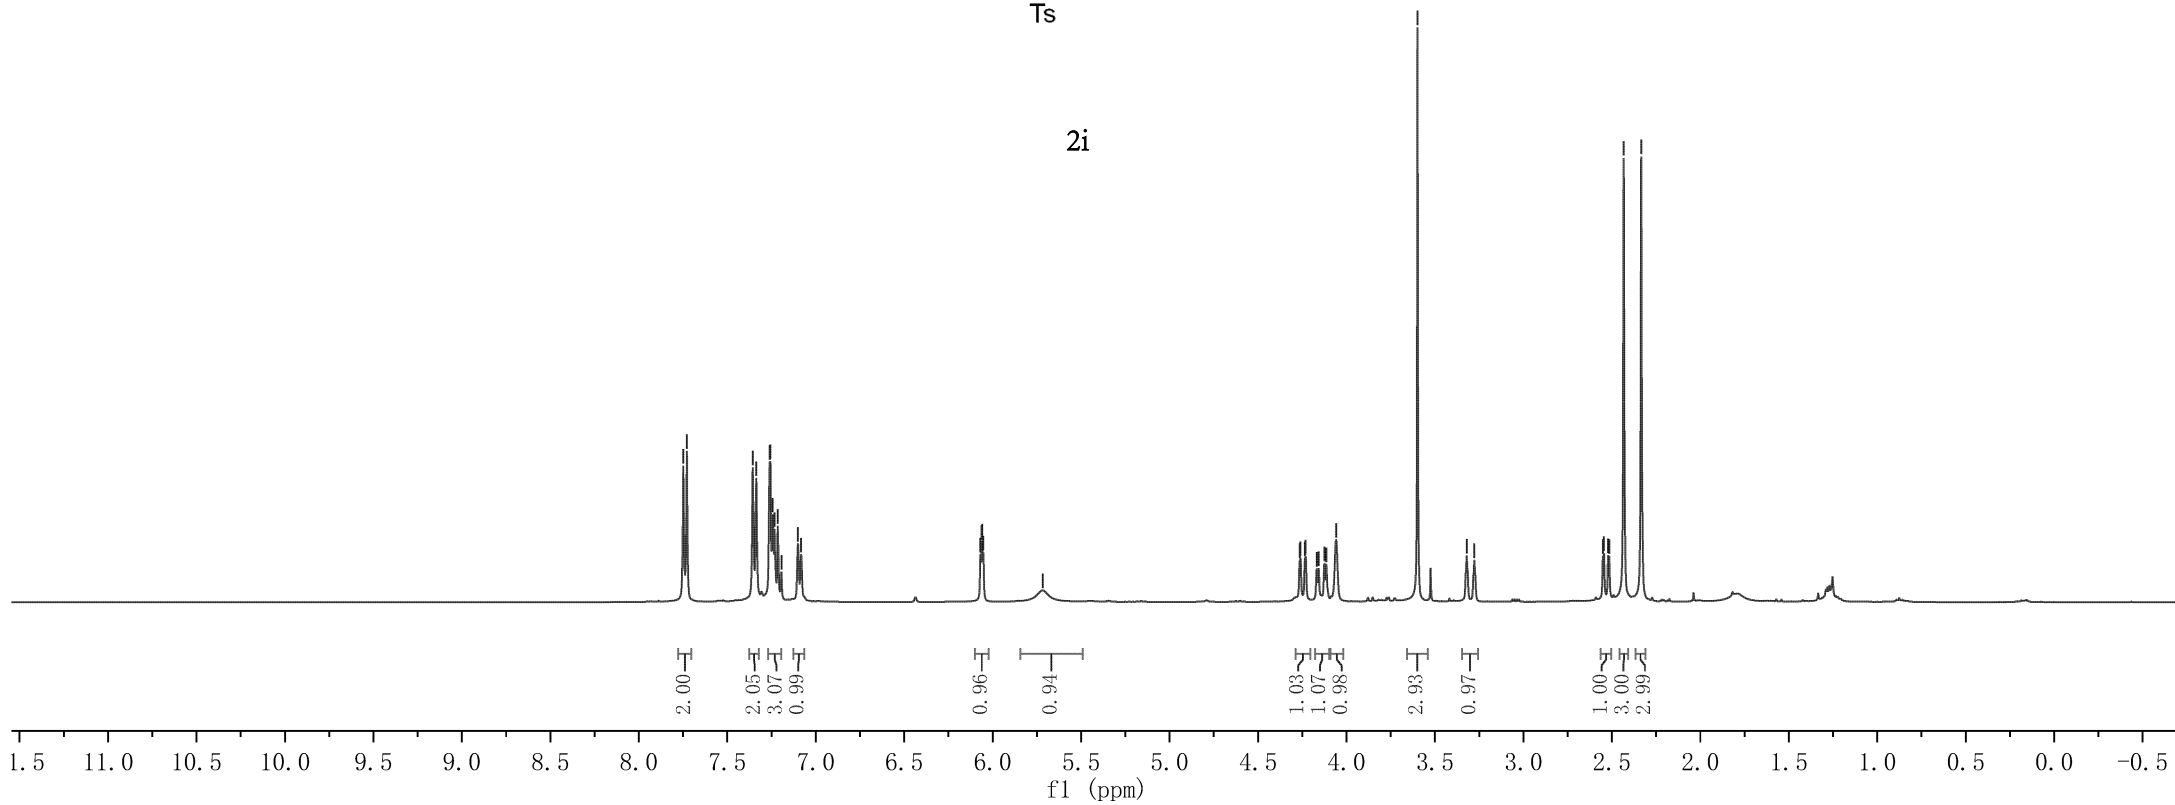

| Parameter                | Value               |
|--------------------------|---------------------|
| 1 Title                  | qlj-11-36-3-C       |
| 2 Origin                 | Bruker BioSpin GmbH |
| 3 Solvent                | CDC13               |
| 4 Temperature            | 295.9               |
| 5 Number of Scans        | 172                 |
| 6 Acquisition Time       | 1.3763              |
| 7 Acquisition Date       | 2025-06-14T16:40:25 |
| 8 Spectrometer Frequency | 100.64              |
| 9 Spectral Width         | 23809.5             |
| 10 Lowest Frequency      | -1850.5             |
| 11 Nucleus               | 13C                 |
| 12 Acquired Size         | 32768               |
| 13 Spectral Size         | 32768               |

143.74  
138.36  
138.17  
133.77  
132.89  
129.69  
128.64  
128.48  
127.73  
126.36  
123.83  
122.61

77.32  
77.00  
76.68

62.02  
56.44

45.43  
44.84

21.47  
21.45

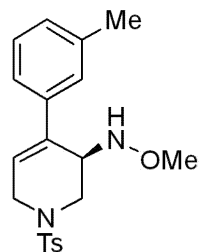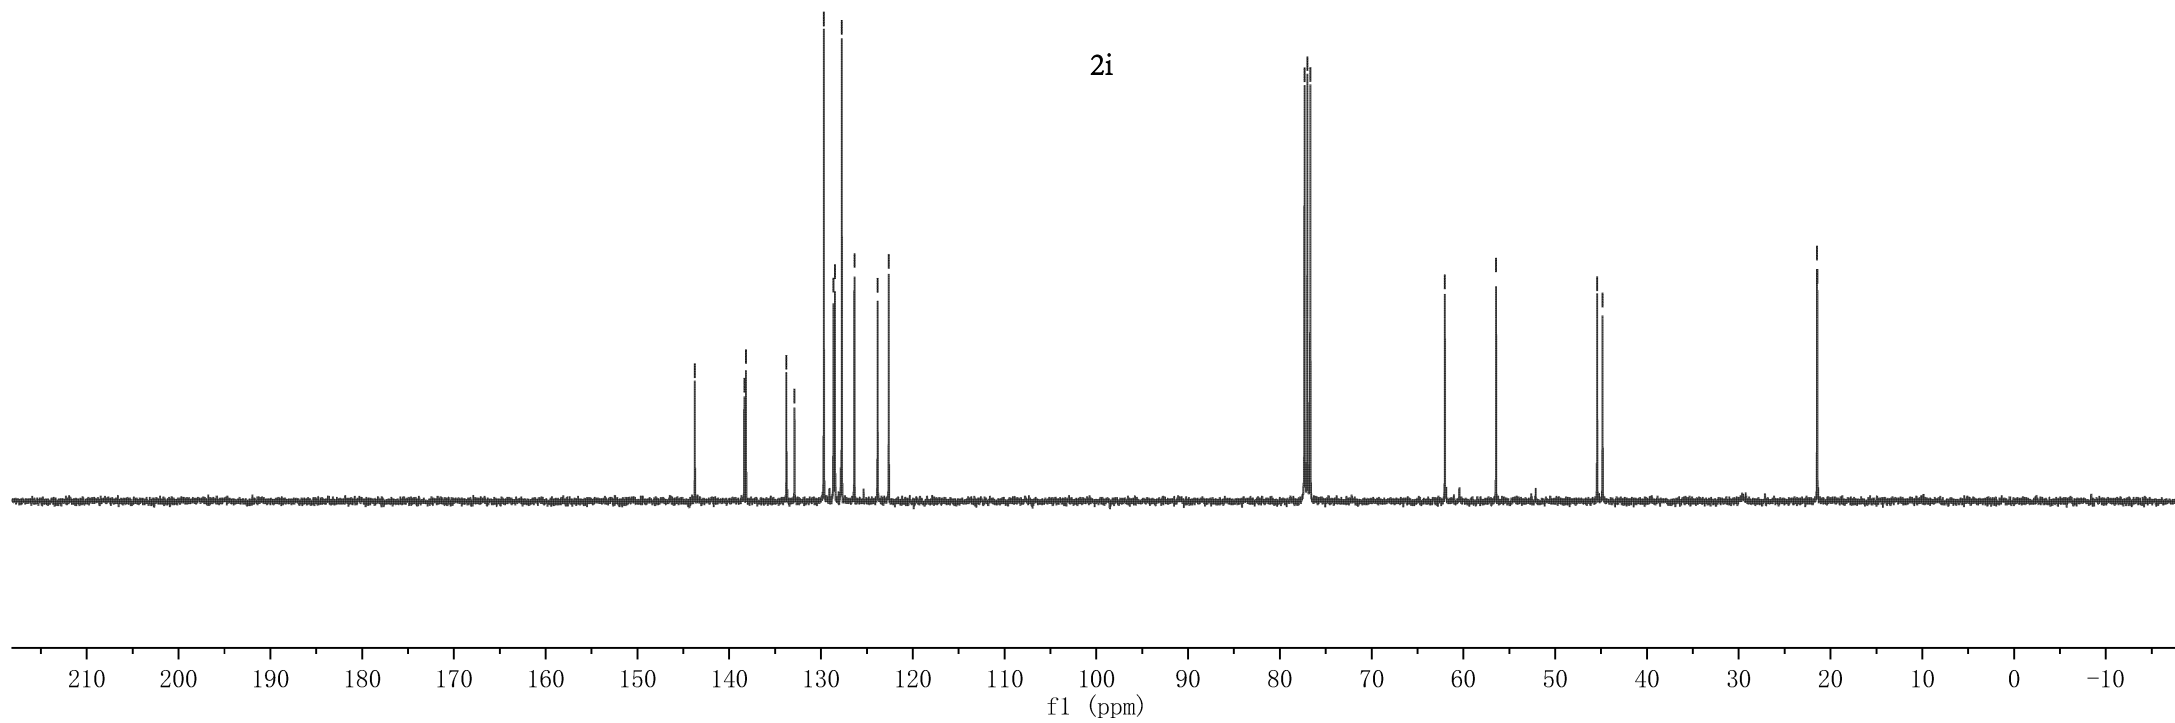

| Parameter                | Value               |
|--------------------------|---------------------|
| 1 Title                  | qlj-11-37-2-H       |
| 2 Origin                 | Bruker BioSpin GmbH |
| 3 Solvent                | CDC13               |
| 4 Temperature            | 295.1               |
| 5 Number of Scans        | 16                  |
| 6 Acquisition Time       | 3.9977              |
| 7 Acquisition Date       | 2025-06-16T18:19:09 |
| 8 Spectrometer Frequency | 400.25              |
| 9 Spectral Width         | 8196.7              |
| 10 Lowest Frequency      | -1701.3             |
| 11 Nucleus               | <sup>1</sup> H      |
| 12 Acquired Size         | 32768               |
| 13 Spectral Size         | 65536               |

7.587 7.567 7.193 7.173 7.116 7.097 7.067 6.626 6.605 5.823 5.817 5.813 5.808 5.557 4.103 4.073 3.995 3.984 3.952 3.941 3.876 3.652 3.447 3.143 3.101 2.370 2.365 2.340 2.336 2.272 2.035

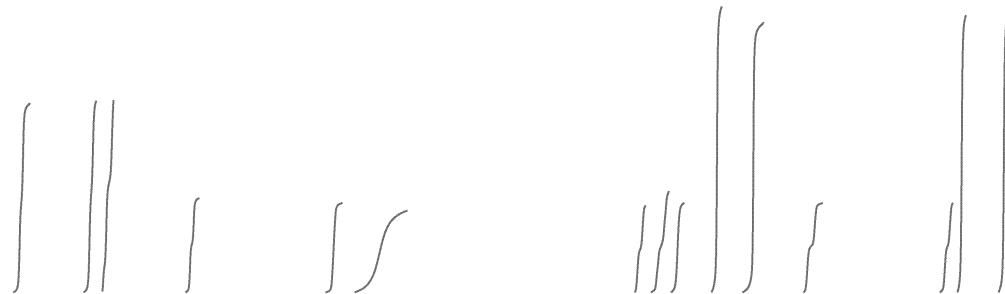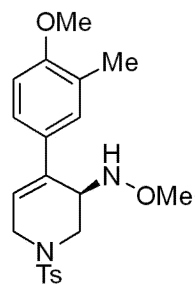

2j

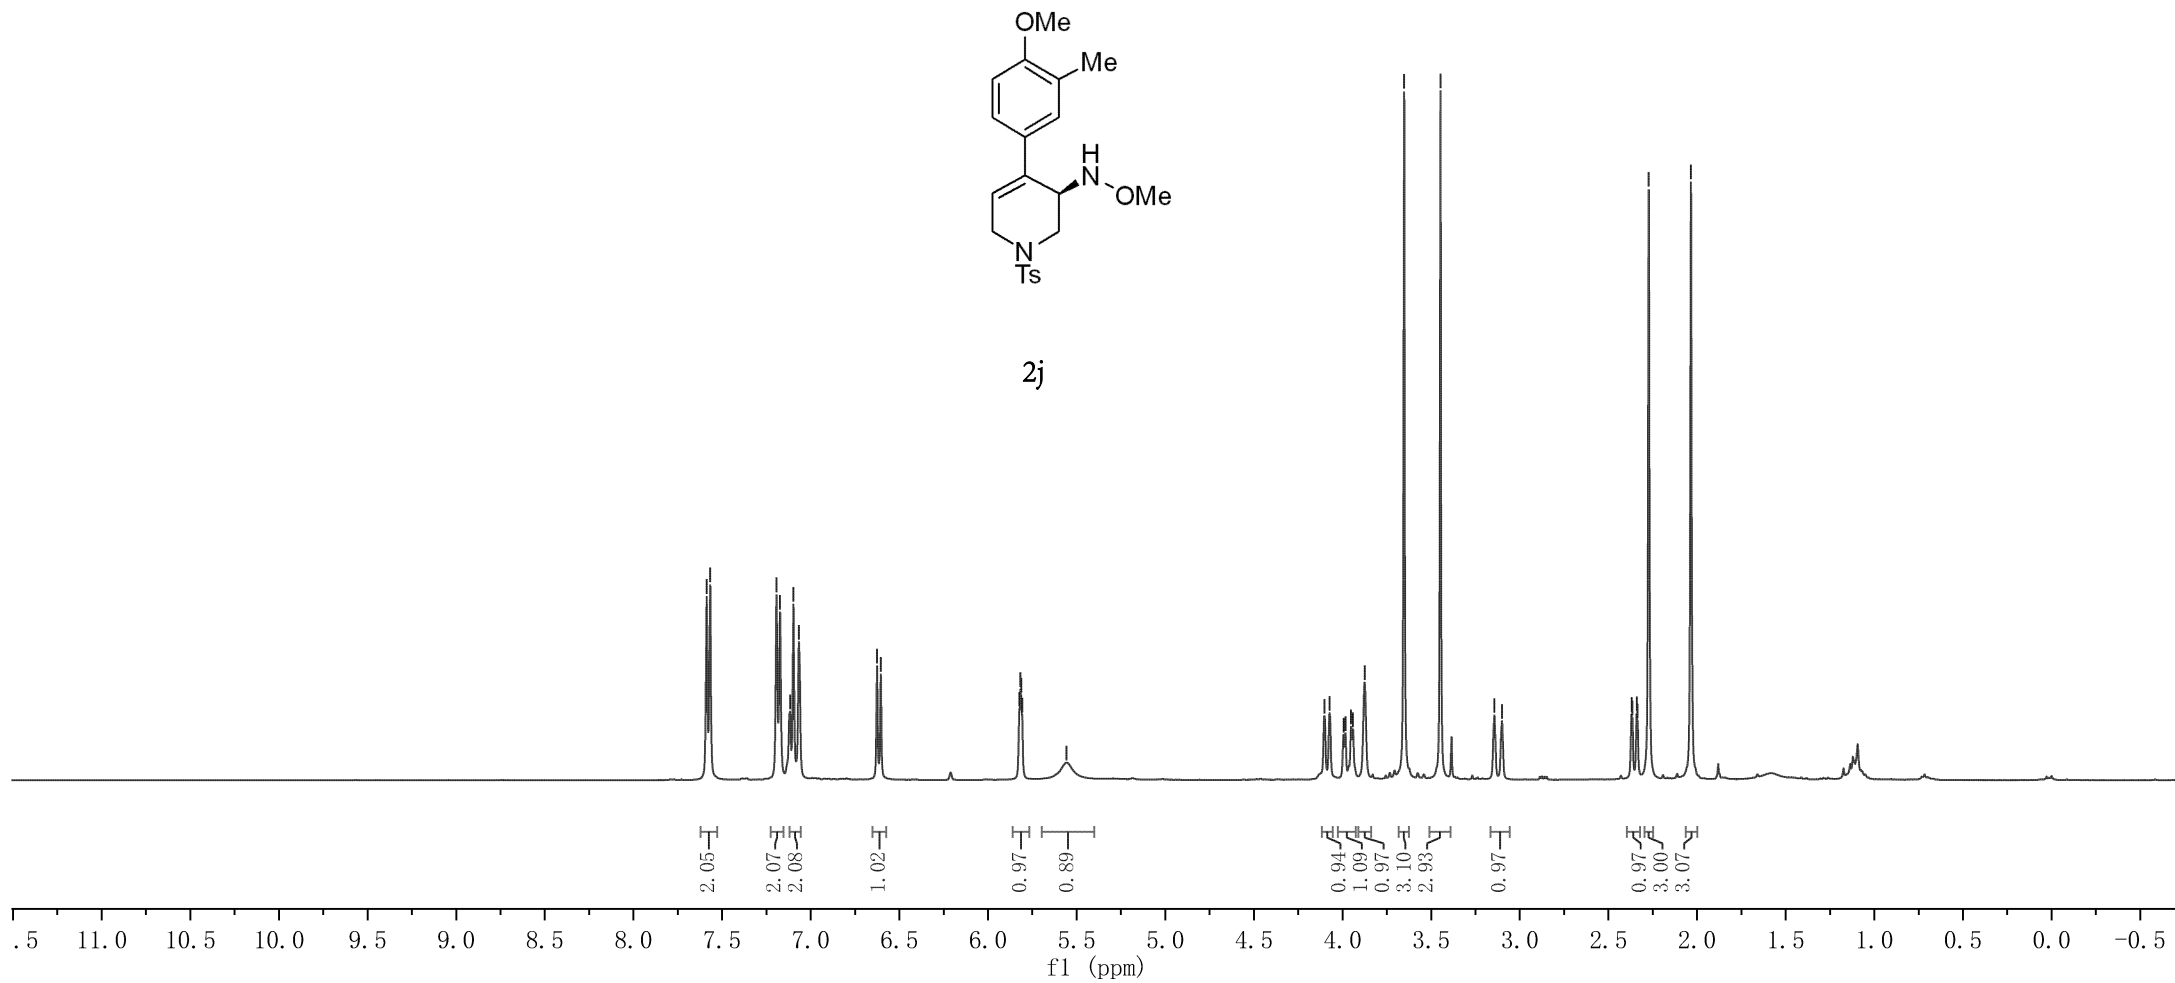

| Parameter                | Value               |
|--------------------------|---------------------|
| 1 Title                  | qlj-11-37-2-C       |
| 2 Origin                 | Bruker BioSpin GmbH |
| 3 Solvent                | CDC13               |
| 4 Temperature            | 295.9               |
| 5 Number of Scans        | 106                 |
| 6 Acquisition Time       | 1.3763              |
| 7 Acquisition Date       | 2025-06-16T18:25:36 |
| 8 Spectrometer Frequency | 100.64              |
| 9 Spectral Width         | 23809.5             |
| 10 Lowest Frequency      | -1848.8             |
| 11 Nucleus               | 13C                 |
| 12 Acquired Size         | 32768               |
| 13 Spectral Size         | 32768               |

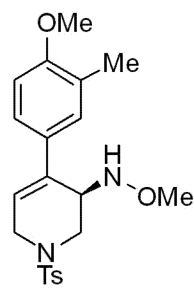

2j

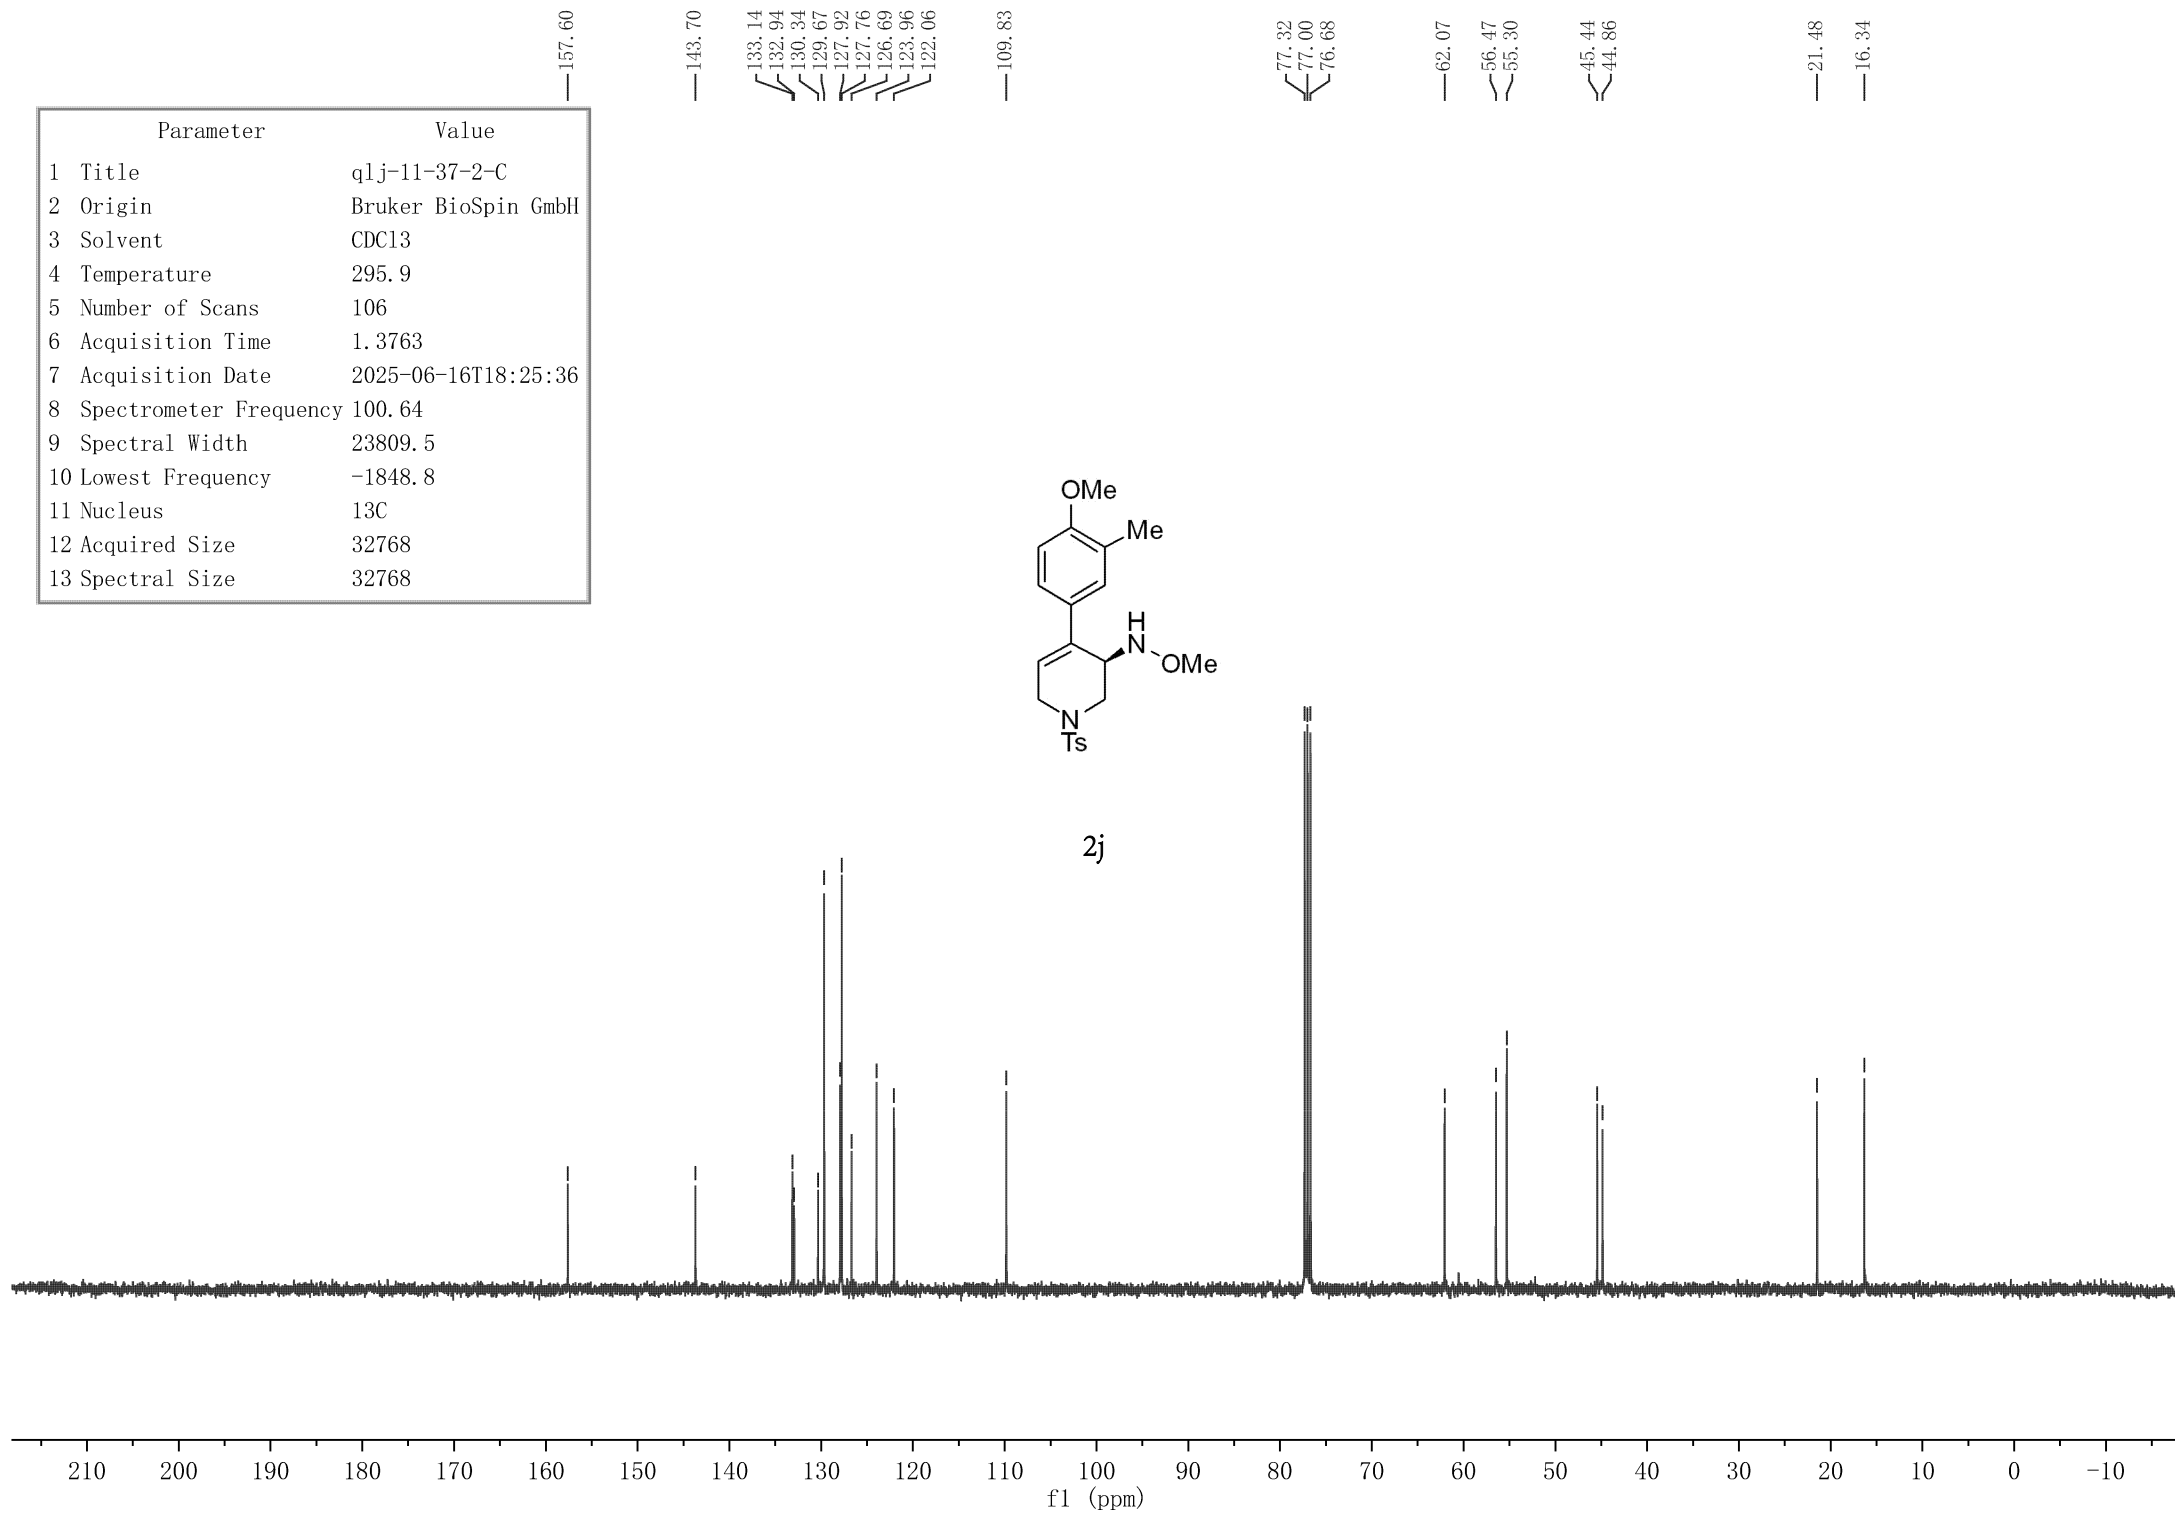

| Parameter                | Value               |
|--------------------------|---------------------|
| 1 Title                  | qlj-11-37-1-H;;     |
| 2 Origin                 | Bruker BioSpin GmbH |
| 3 Solvent                | CDC13               |
| 4 Temperature            | 295.2               |
| 5 Number of Scans        | 16                  |
| 6 Acquisition Time       | 3.9977              |
| 7 Acquisition Date       | 2025-06-17T02:37:53 |
| 8 Spectrometer Frequency | 400.25              |
| 9 Spectral Width         | 8196.7              |
| 10 Lowest Frequency      | -1699.8             |
| 11 Nucleus               | <sup>1</sup> H      |
| 12 Acquired Size         | 32768               |
| 13 Spectral Size         | 65536               |

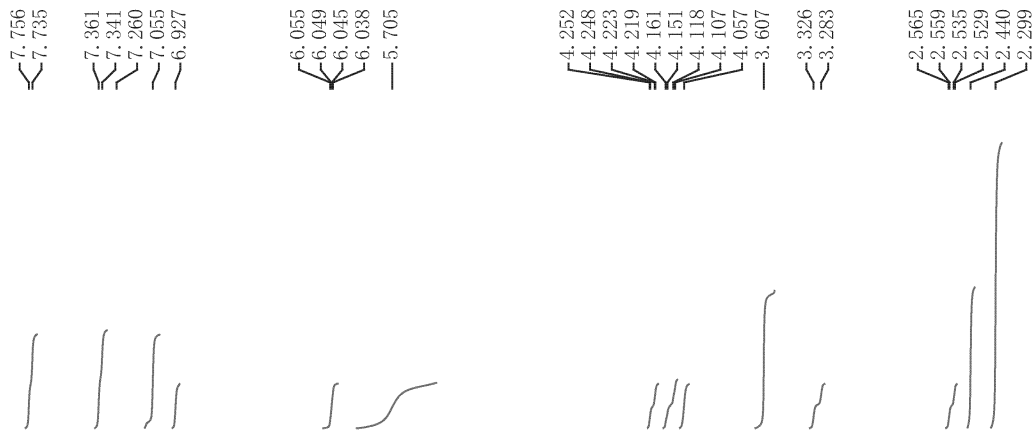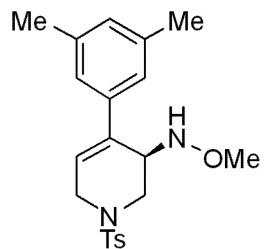

2k

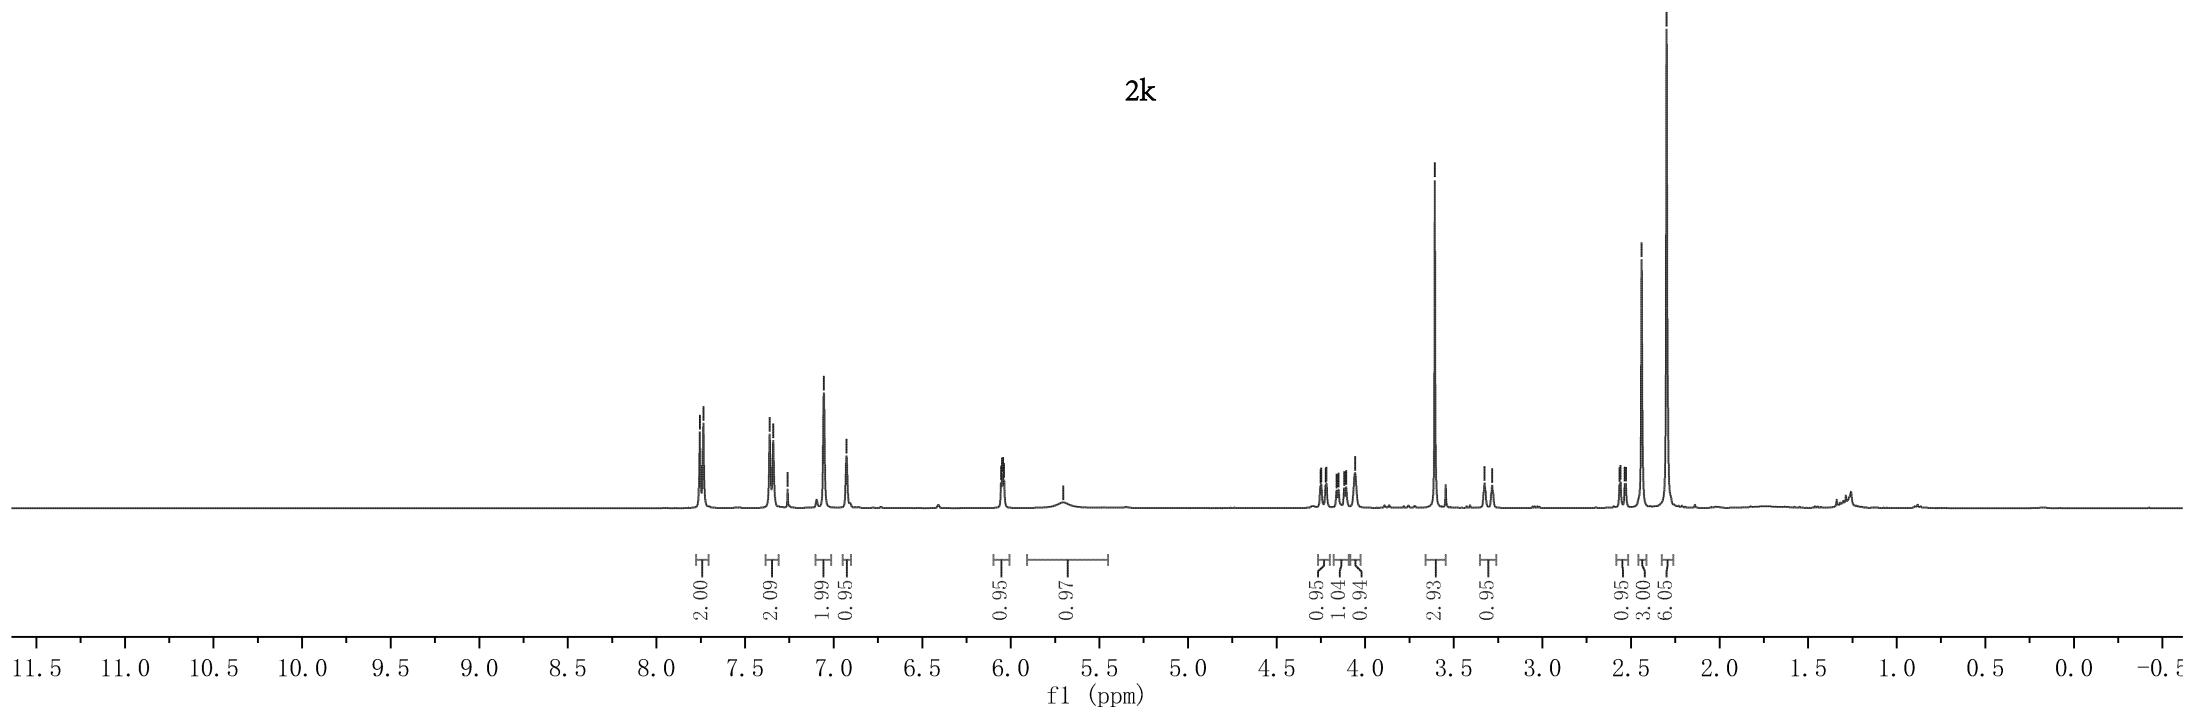

| Parameter                | Value               |
|--------------------------|---------------------|
| 1 Title                  | qlj-11-37-1-C;;     |
| 2 Origin                 | Bruker BioSpin GmbH |
| 3 Solvent                | CDC13               |
| 4 Temperature            | 295.9               |
| 5 Number of Scans        | 250                 |
| 6 Acquisition Time       | 1.3763              |
| 7 Acquisition Date       | 2025-06-17T02:53:44 |
| 8 Spectrometer Frequency | 100.64              |
| 9 Spectral Width         | 23809.5             |
| 10 Lowest Frequency      | -1848.9             |
| 11 Nucleus               | 13C                 |
| 12 Acquired Size         | 32768               |
| 13 Spectral Size         | 32768               |

143.72  
138.33  
138.09  
133.85  
132.96  
129.69  
129.59  
127.75  
123.68  
123.47

77.32  
77.00  
76.68

62.08  
56.49

45.44  
44.89

21.49  
21.33

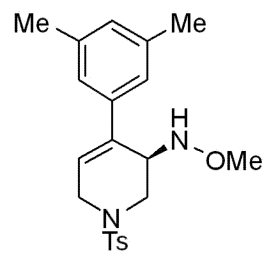

2k

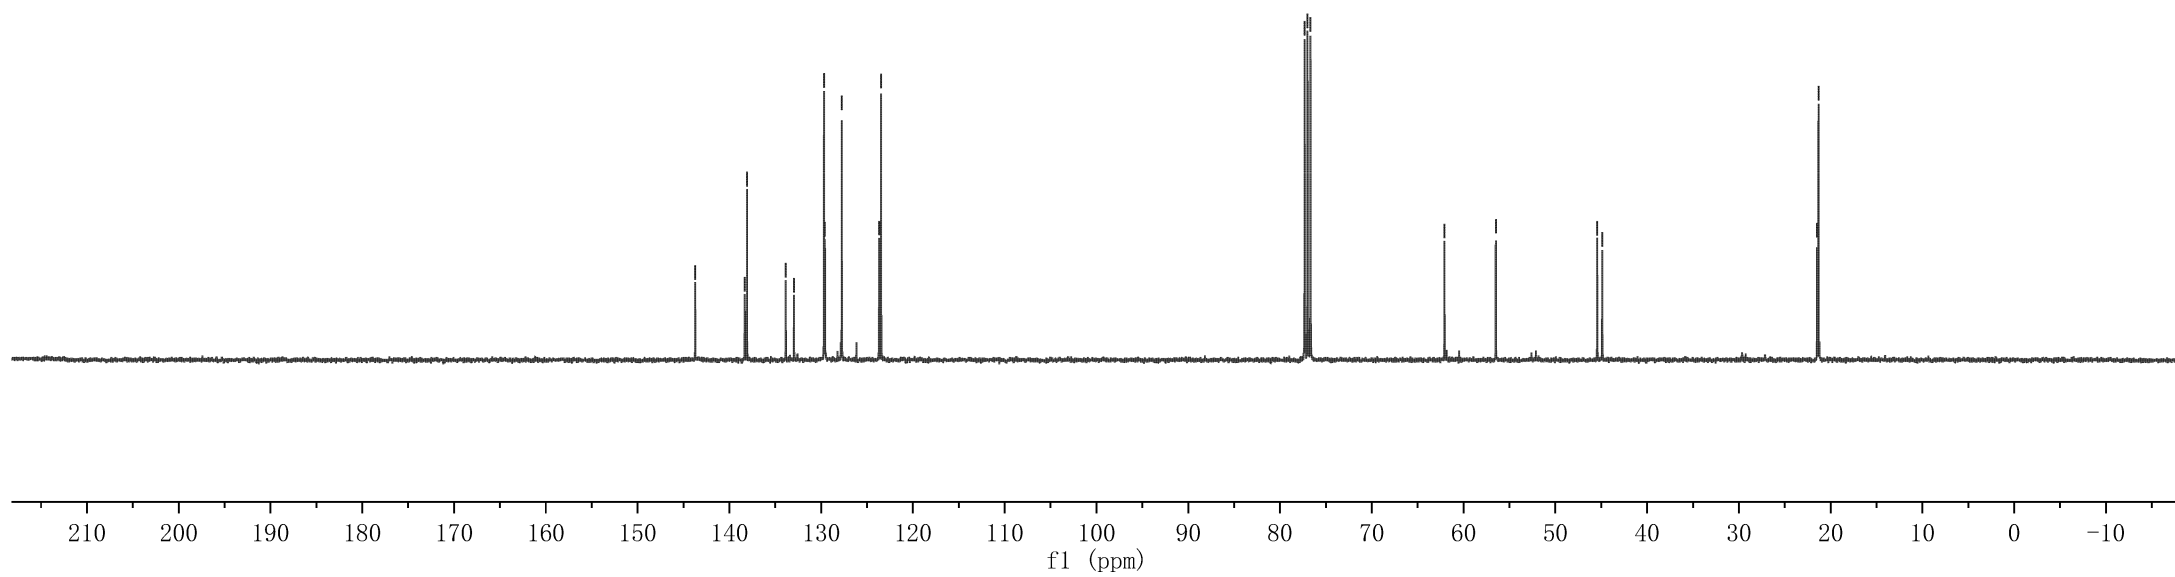

| Parameter                | Value               |
|--------------------------|---------------------|
| 1 Title                  | qlj-11-35-4-H       |
| 2 Origin                 | Bruker BioSpin GmbH |
| 3 Solvent                | CDC13               |
| 4 Temperature            | 294.9               |
| 5 Number of Scans        | 16                  |
| 6 Acquisition Time       | 3.9977              |
| 7 Acquisition Date       | 2025-06-12T16:00:04 |
| 8 Spectrometer Frequency | 400.25              |
| 9 Spectral Width         | 8196.7              |
| 10 Lowest Frequency      | -1664.2             |
| 11 Nucleus               | <sup>1</sup> H      |
| 12 Acquired Size         | 32768               |
| 13 Spectral Size         | 65536               |

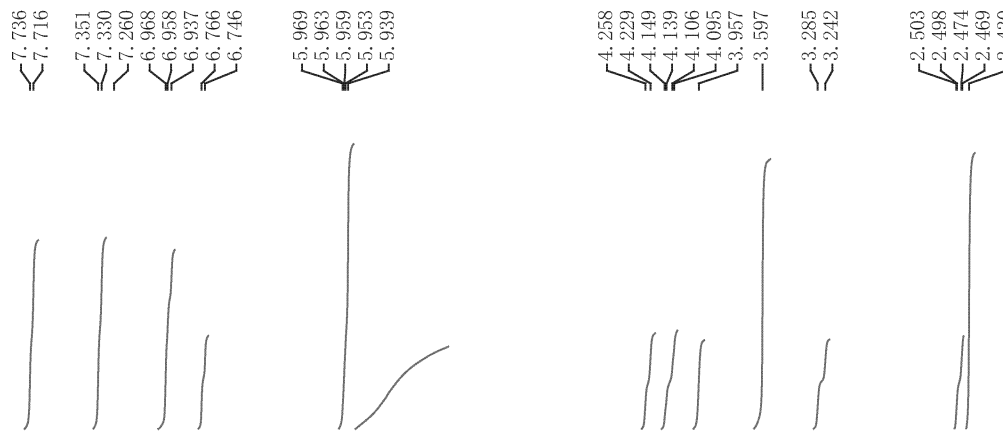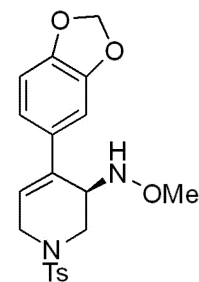

2l

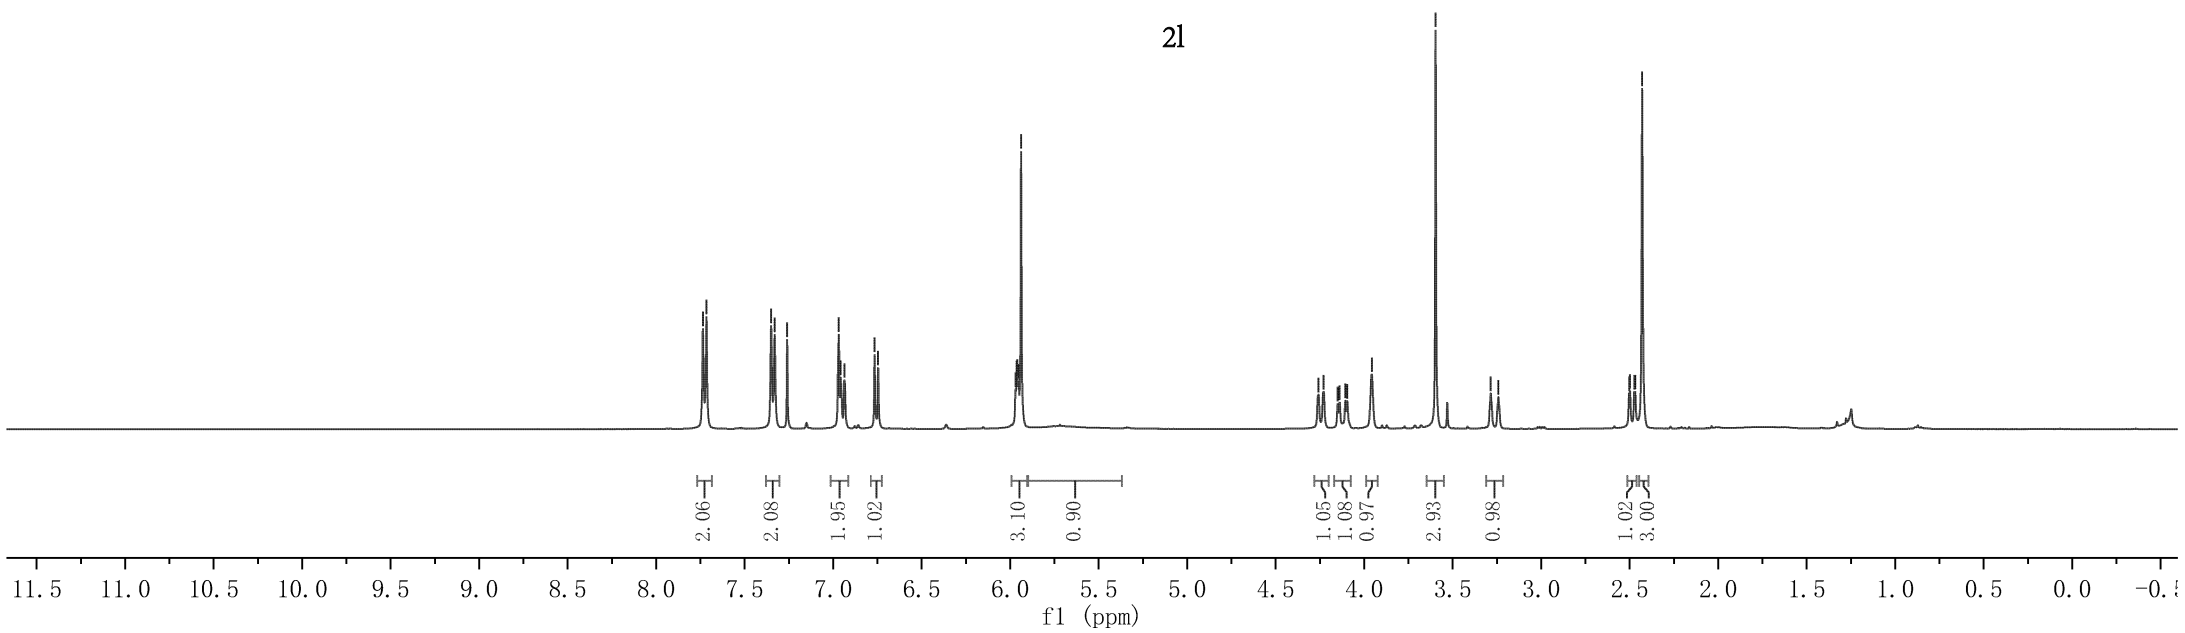

| Parameter                | Value               |
|--------------------------|---------------------|
| 1 Title                  | qlj-11-35-4-C       |
| 2 Origin                 | Bruker BioSpin GmbH |
| 3 Solvent                | CDC13               |
| 4 Temperature            | 295.5               |
| 5 Number of Scans        | 250                 |
| 6 Acquisition Time       | 1.3763              |
| 7 Acquisition Date       | 2025-06-12T16:14:46 |
| 8 Spectrometer Frequency | 100.64              |
| 9 Spectral Width         | 23809.5             |
| 10 Lowest Frequency      | -1848.7             |
| 11 Nucleus               | <sup>13</sup> C     |
| 12 Acquired Size         | 32768               |
| 13 Spectral Size         | 32768               |

<sup>13</sup>C NMR chemical shifts (ppm):  
 147.90, 147.30, 143.77, 133.28, 132.85, 129.69, 127.74, 122.99, 119.18, 108.25, 106.22, 101.11, 77.32, 77.00, 76.68, 61.99, 56.69, 45.37, 44.74, 21.48

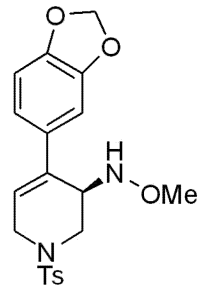

21

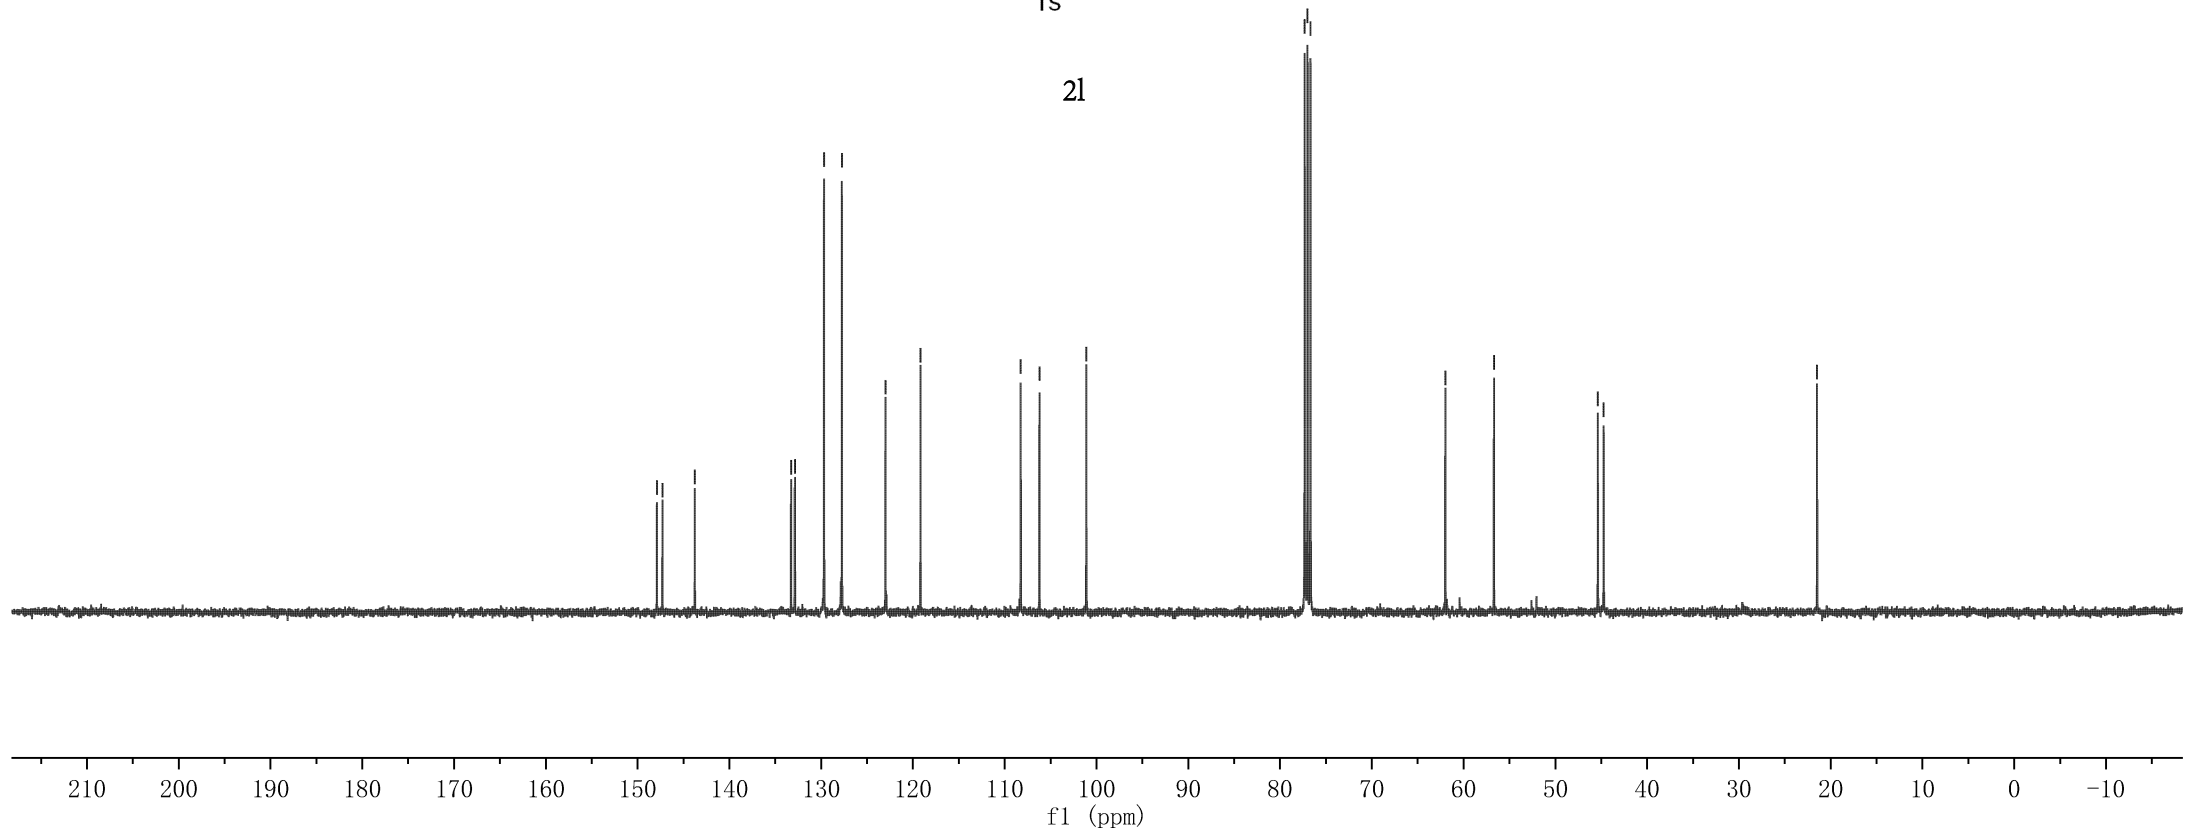

| Parameter                | Value               |
|--------------------------|---------------------|
| 1 Title                  | qlj-11-35-1-H       |
| 2 Origin                 | Bruker BioSpin GmbH |
| 3 Solvent                | CDC13               |
| 4 Temperature            | 295.7               |
| 5 Number of Scans        | 16                  |
| 6 Acquisition Time       | 3.9977              |
| 7 Acquisition Date       | 2025-06-10T15:59:03 |
| 8 Spectrometer Frequency | 400.25              |
| 9 Spectral Width         | 8196.7              |
| 10 Lowest Frequency      | -1636.3             |
| 11 Nucleus               | 1H                  |
| 12 Acquired Size         | 32768               |
| 13 Spectral Size         | 65536               |

7.955  
7.827  
7.822  
7.808  
7.795  
7.786  
7.779  
7.758  
7.584  
7.581  
7.563  
7.559  
7.479  
7.473  
7.464  
7.455  
7.450  
7.372  
7.352  
7.260  
6.231  
6.225  
6.221  
6.215  
— 5.800

4.333  
4.303  
4.241  
4.230  
4.214  
4.199  
4.187  
— 3.639  
3.383  
3.339  
2.609  
2.603  
2.579  
2.574  
2.445

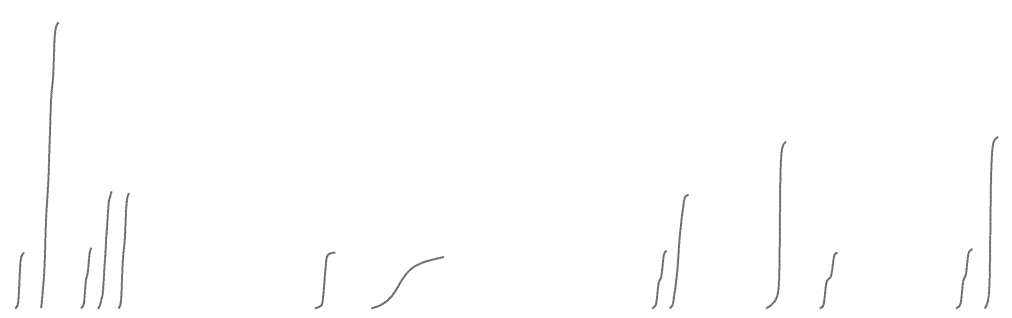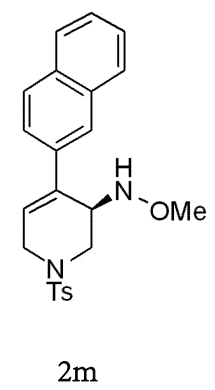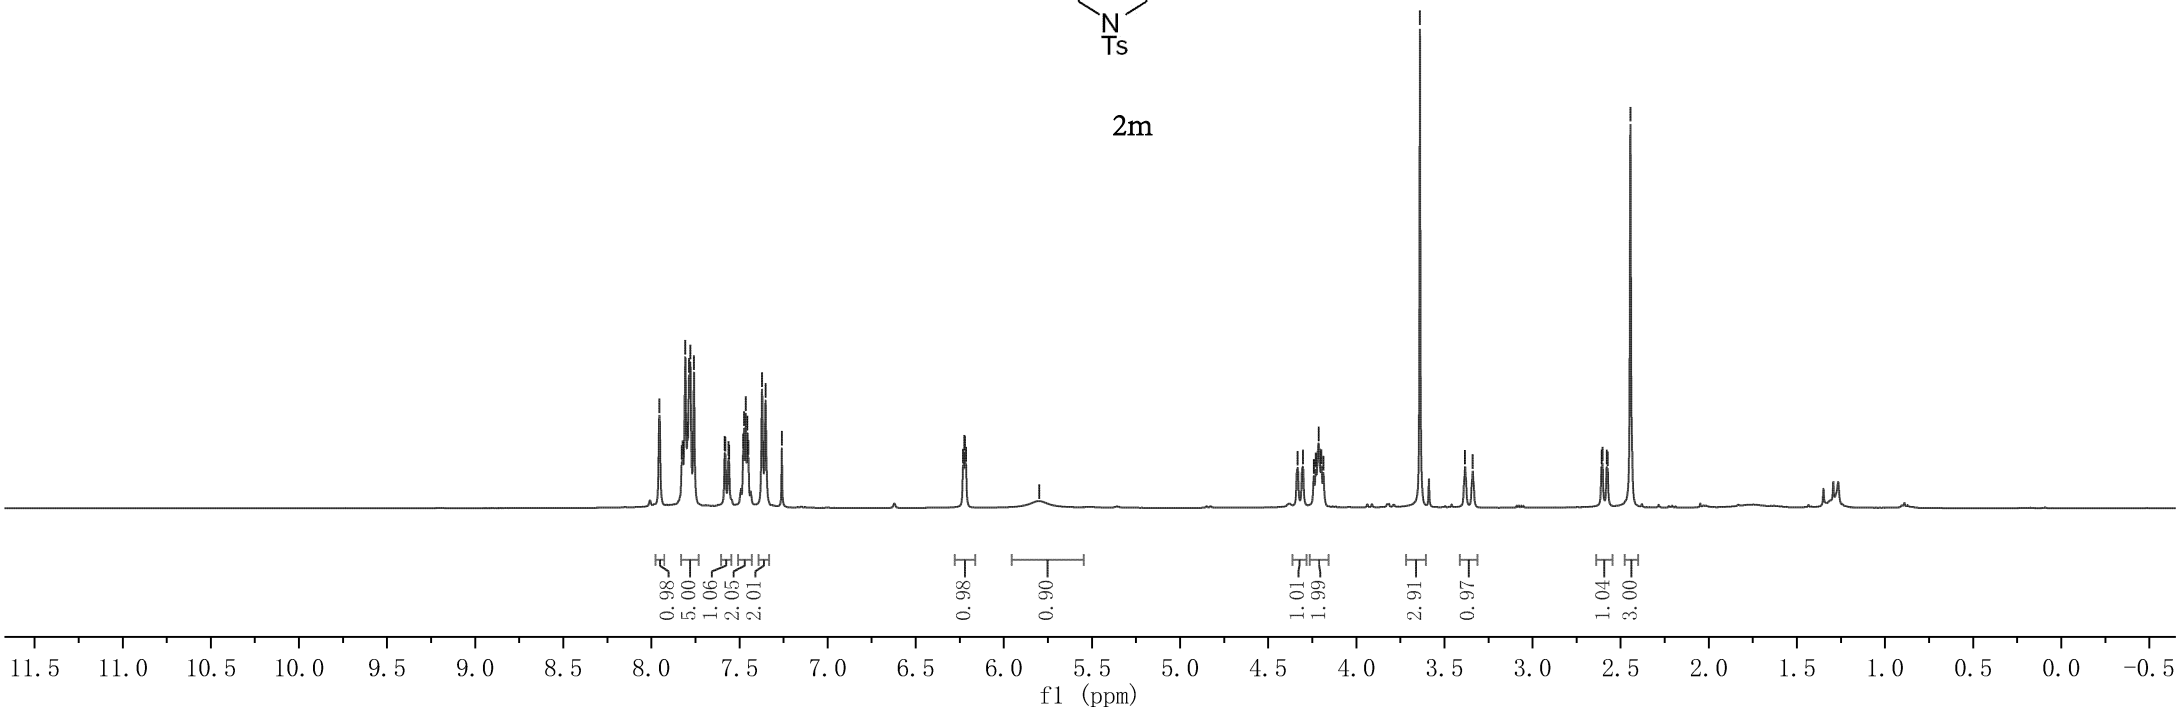

| Parameter                | Value               |
|--------------------------|---------------------|
| 1 Title                  | qlj-11-35-1-C       |
| 2 Origin                 | Bruker BioSpin GmbH |
| 3 Solvent                | CDC13               |
| 4 Temperature            | 296.5               |
| 5 Number of Scans        | 250                 |
| 6 Acquisition Time       | 1.3763              |
| 7 Acquisition Date       | 2025-06-10T16:13:45 |
| 8 Spectrometer Frequency | 100.64              |
| 9 Spectral Width         | 23809.5             |
| 10 Lowest Frequency      | -1850.5             |
| 11 Nucleus               | <sup>13</sup> C     |
| 12 Acquired Size         | 32768               |
| 13 Spectral Size         | 32768               |

143.79  
135.65  
133.60  
133.30  
132.90  
132.85  
129.71  
128.21  
128.17  
127.76  
127.48  
126.29  
126.10  
124.48  
123.65

77.32  
77.00  
76.68

62.07

56.47

45.54  
44.86

21.48

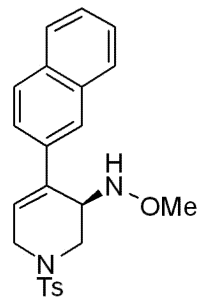

2m

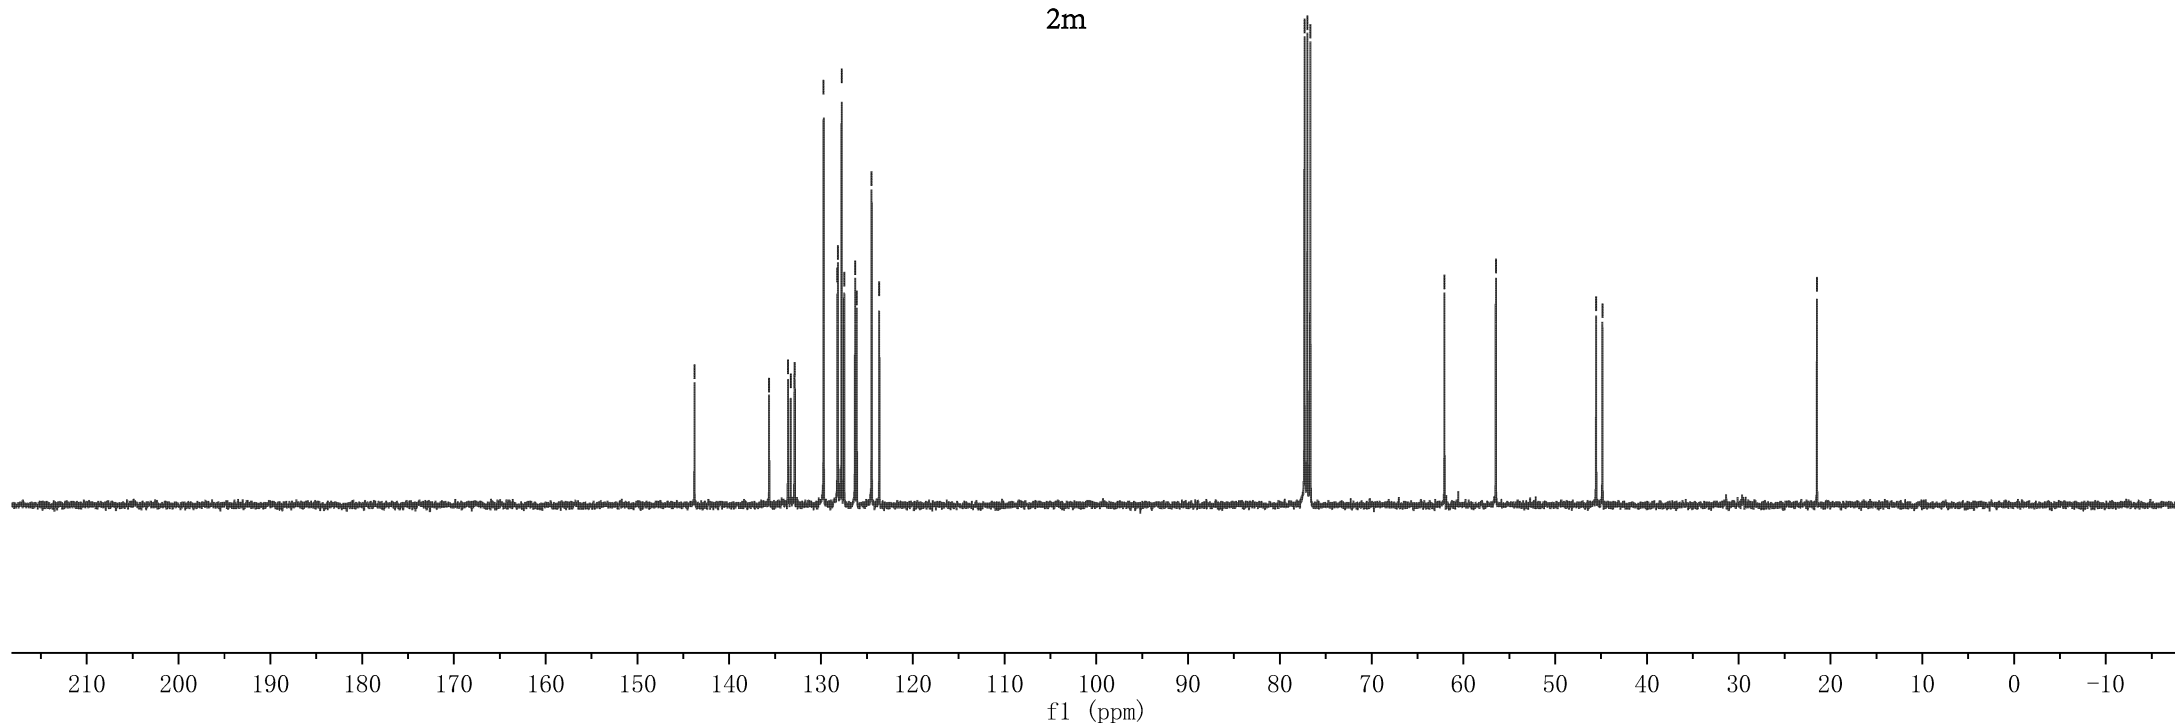

| Parameter                | Value               |
|--------------------------|---------------------|
| 1 Title                  | qlj-11-39-1-H       |
| 2 Origin                 | Bruker BioSpin GmbH |
| 3 Solvent                | CDC13               |
| 4 Temperature            | 295.3               |
| 5 Number of Scans        | 16                  |
| 6 Acquisition Time       | 3.9977              |
| 7 Acquisition Date       | 2025-06-17T17:00:19 |
| 8 Spectrometer Frequency | 400.25              |
| 9 Spectral Width         | 8196.7              |
| 10 Lowest Frequency      | -1704.1             |
| 11 Nucleus               | <sup>1</sup> H      |
| 12 Acquired Size         | 32768               |
| 13 Spectral Size         | 65536               |

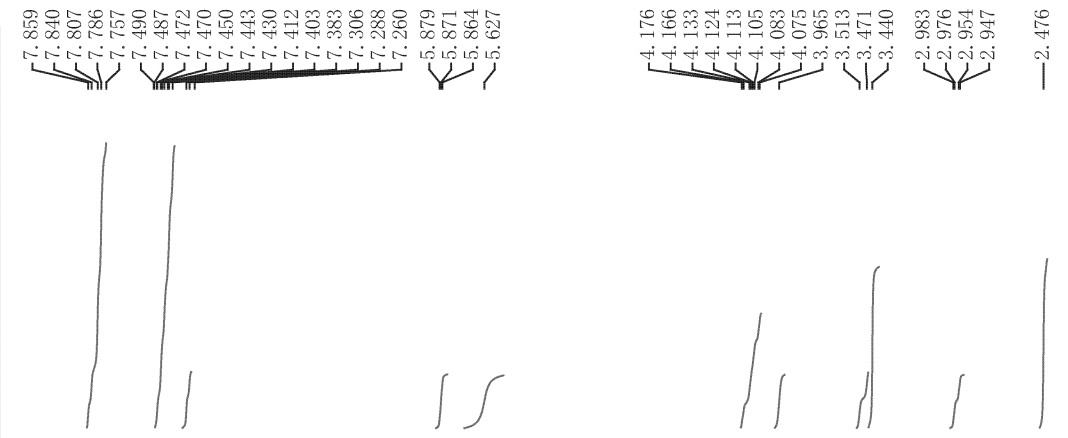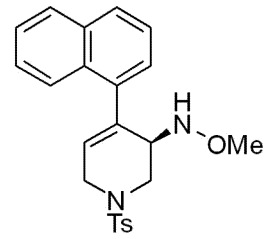

2n

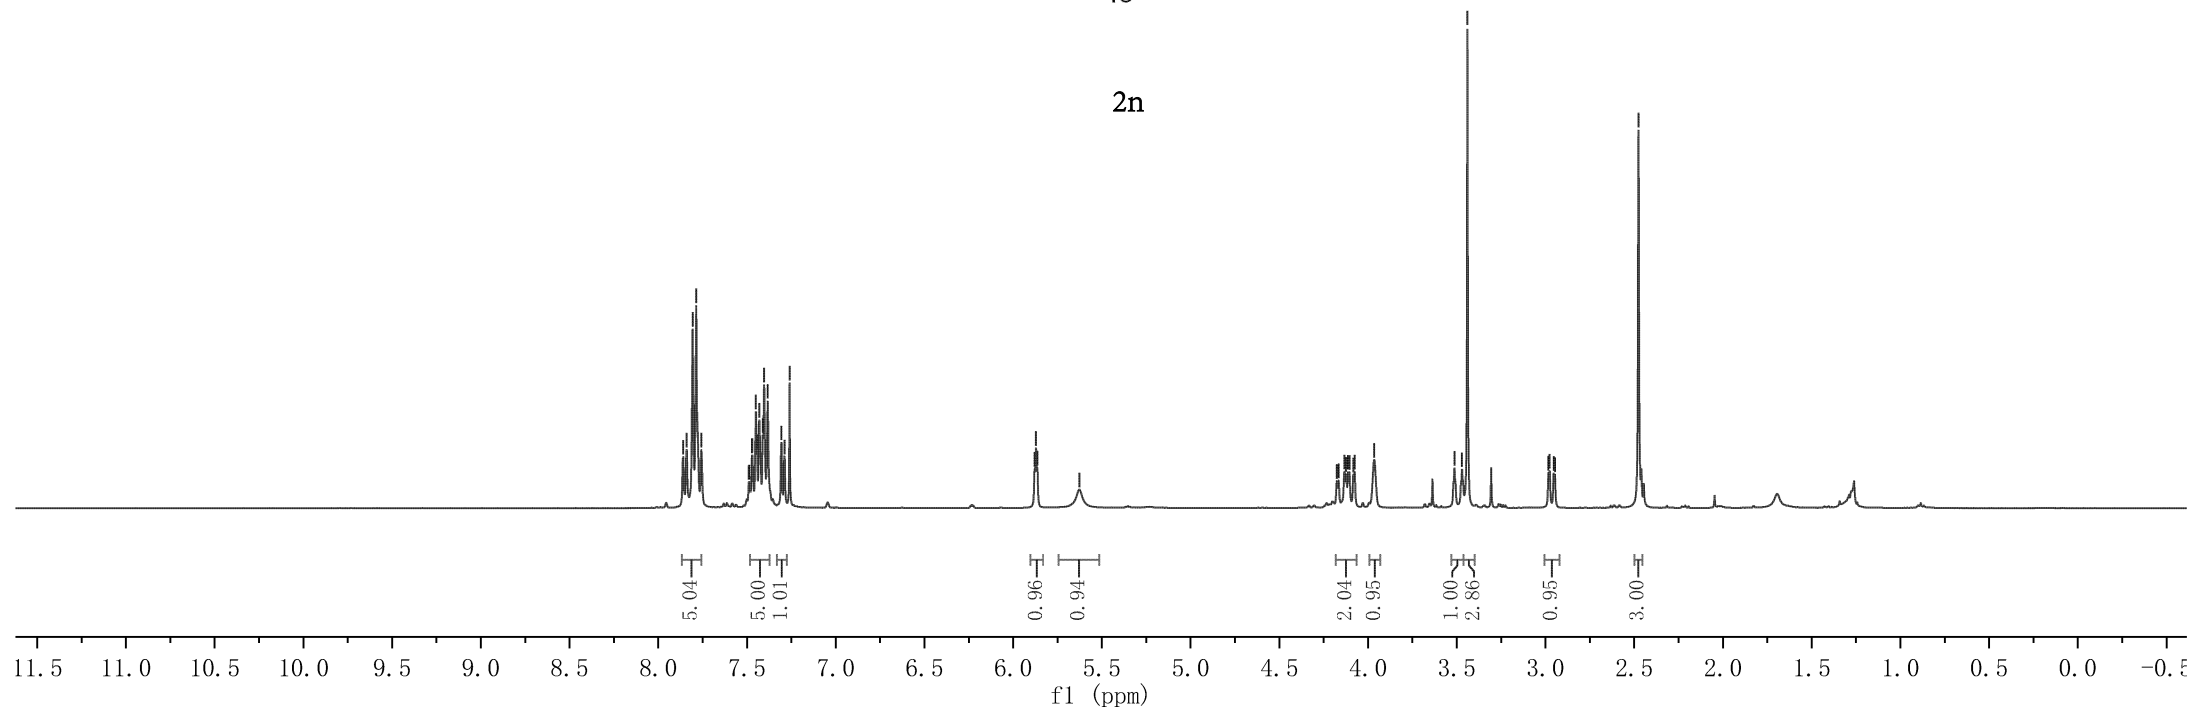

| Parameter                | Value               |
|--------------------------|---------------------|
| 1 Title                  | qlj-11-39-1-C       |
| 2 Origin                 | Bruker BioSpin GmbH |
| 3 Solvent                | CDC13               |
| 4 Temperature            | 296.1               |
| 5 Number of Scans        | 250                 |
| 6 Acquisition Time       | 1.3763              |
| 7 Acquisition Date       | 2025-06-17T17:15:02 |
| 8 Spectrometer Frequency | 100.64              |
| 9 Spectral Width         | 23809.5             |
| 10 Lowest Frequency      | -1847.9             |
| 11 Nucleus               | <sup>13</sup> C     |
| 12 Acquired Size         | 32768               |
| 13 Spectral Size         | 32768               |

143.78  
137.26  
134.30  
133.69  
133.09  
131.41  
129.77  
128.44  
128.05  
127.82  
127.47  
126.07  
125.98  
125.82  
125.16  
125.05

77.32  
77.00  
76.68

62.20  
58.91

45.35  
45.22

21.54

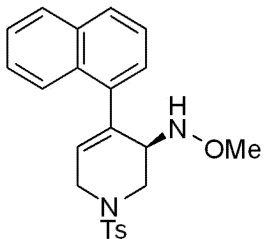

2n

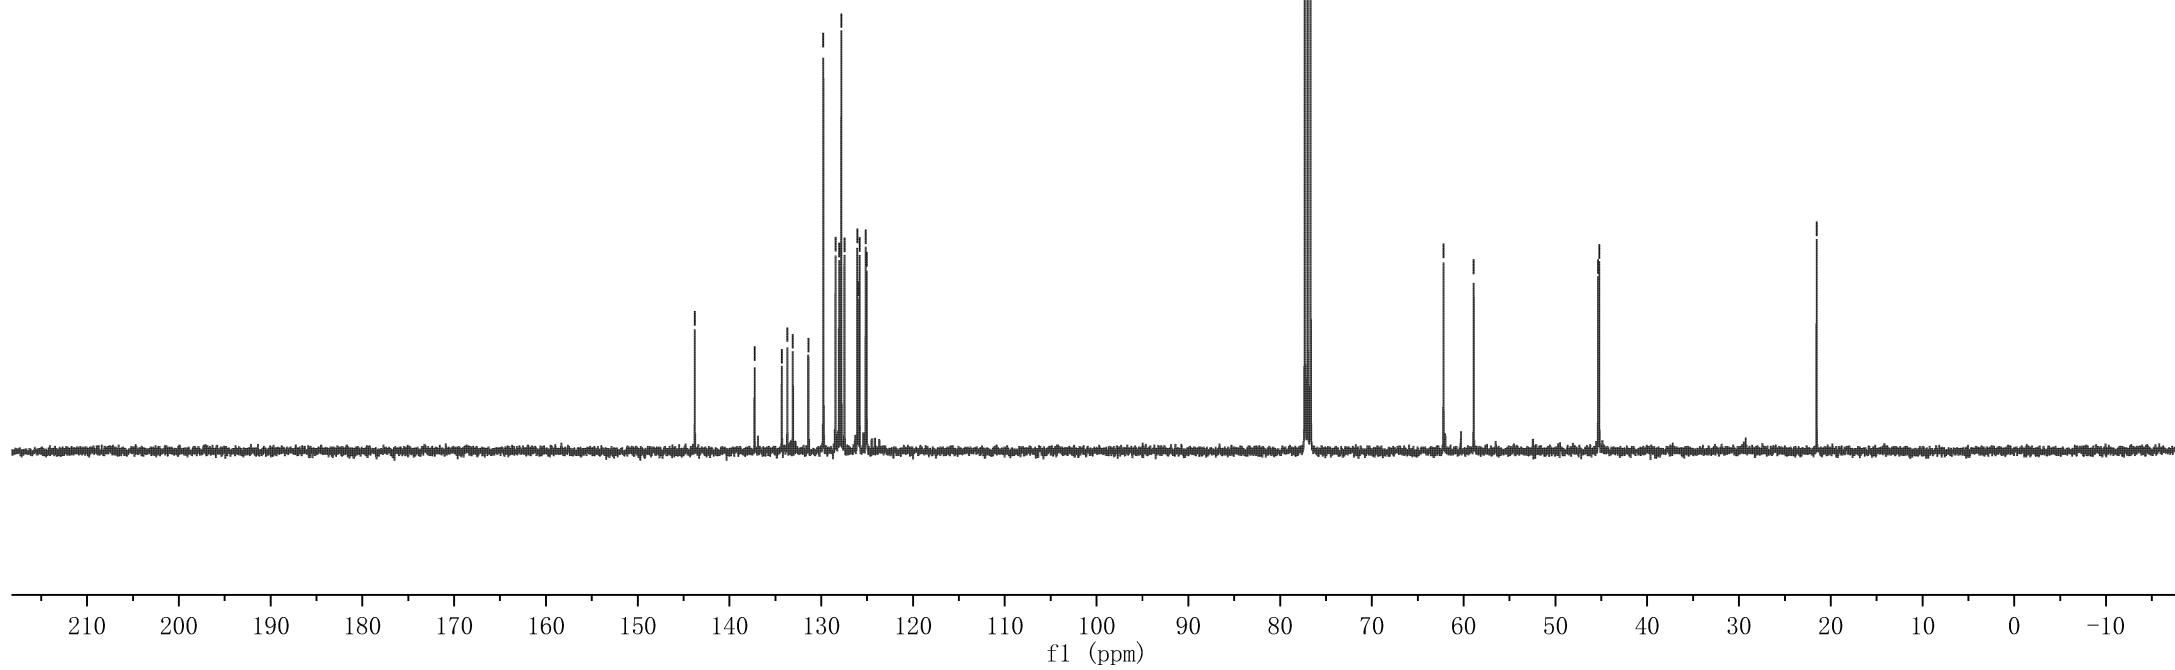

| Parameter                | Value               |
|--------------------------|---------------------|
| 1 Title                  | qlj-11-36-4-H       |
| 2 Origin                 | Bruker BioSpin GmbH |
| 3 Solvent                | CDC13               |
| 4 Temperature            | 295.3               |
| 5 Number of Scans        | 16                  |
| 6 Acquisition Time       | 3.9977              |
| 7 Acquisition Date       | 2025-06-14T16:46:04 |
| 8 Spectrometer Frequency | 400.25              |
| 9 Spectral Width         | 8196.7              |
| 10 Lowest Frequency      | -1700.2             |
| 11 Nucleus               | <sup>1</sup> H      |
| 12 Acquired Size         | 32768               |
| 13 Spectral Size         | 65536               |

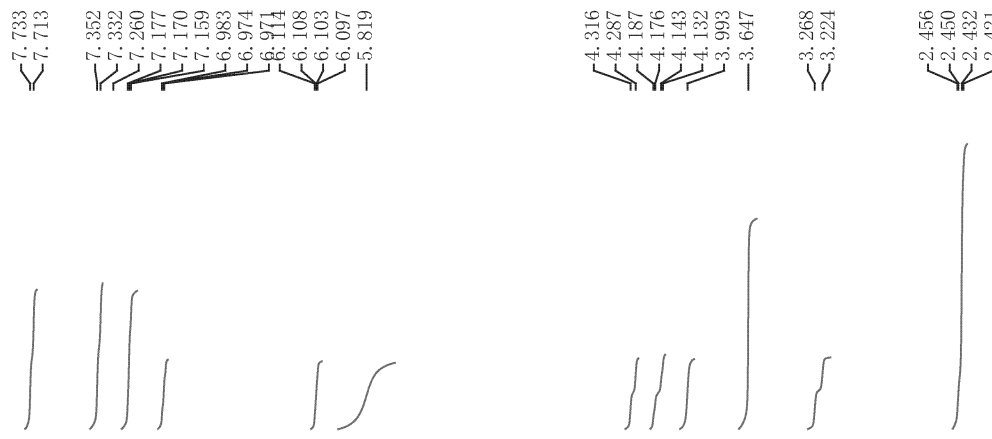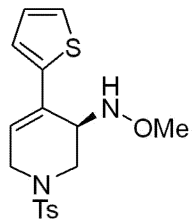

2o

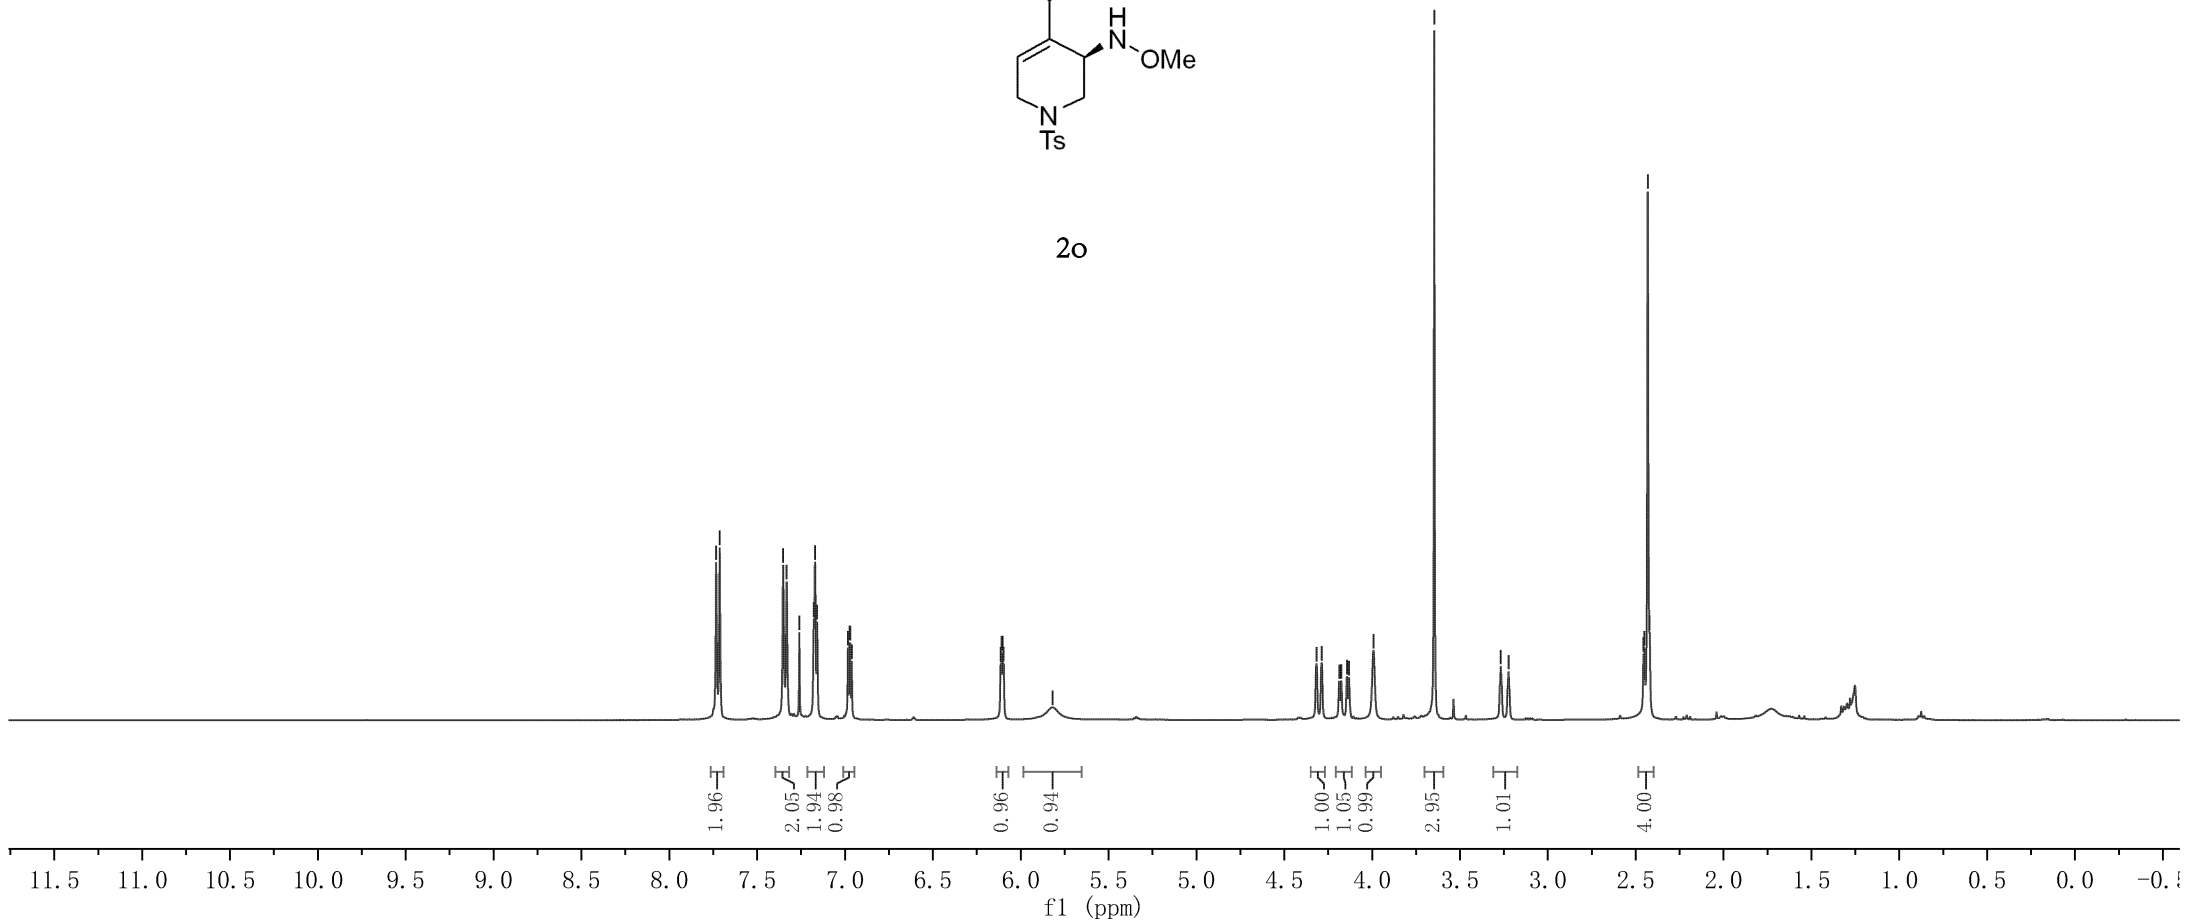

| Parameter                | Value               |
|--------------------------|---------------------|
| 1 Title                  | qlj-11-36-4-C       |
| 2 Origin                 | Bruker BioSpin GmbH |
| 3 Solvent                | CDC13               |
| 4 Temperature            | 296.0               |
| 5 Number of Scans        | 250                 |
| 6 Acquisition Time       | 1.3763              |
| 7 Acquisition Date       | 2025-06-14T17:00:46 |
| 8 Spectrometer Frequency | 100.64              |
| 9 Spectral Width         | 23809.5             |
| 10 Lowest Frequency      | -1847.7             |
| 11 Nucleus               | <sup>13</sup> C     |
| 12 Acquired Size         | 32768               |
| 13 Spectral Size         | 32768               |

143.85  
142.59  
132.86  
129.74  
128.20  
127.72  
127.44  
124.46  
123.35  
122.39

77.32  
77.00  
76.68

61.96  
57.17

45.11  
44.40

21.49

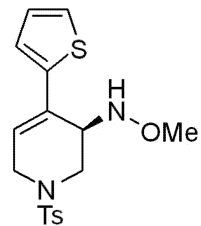

2o

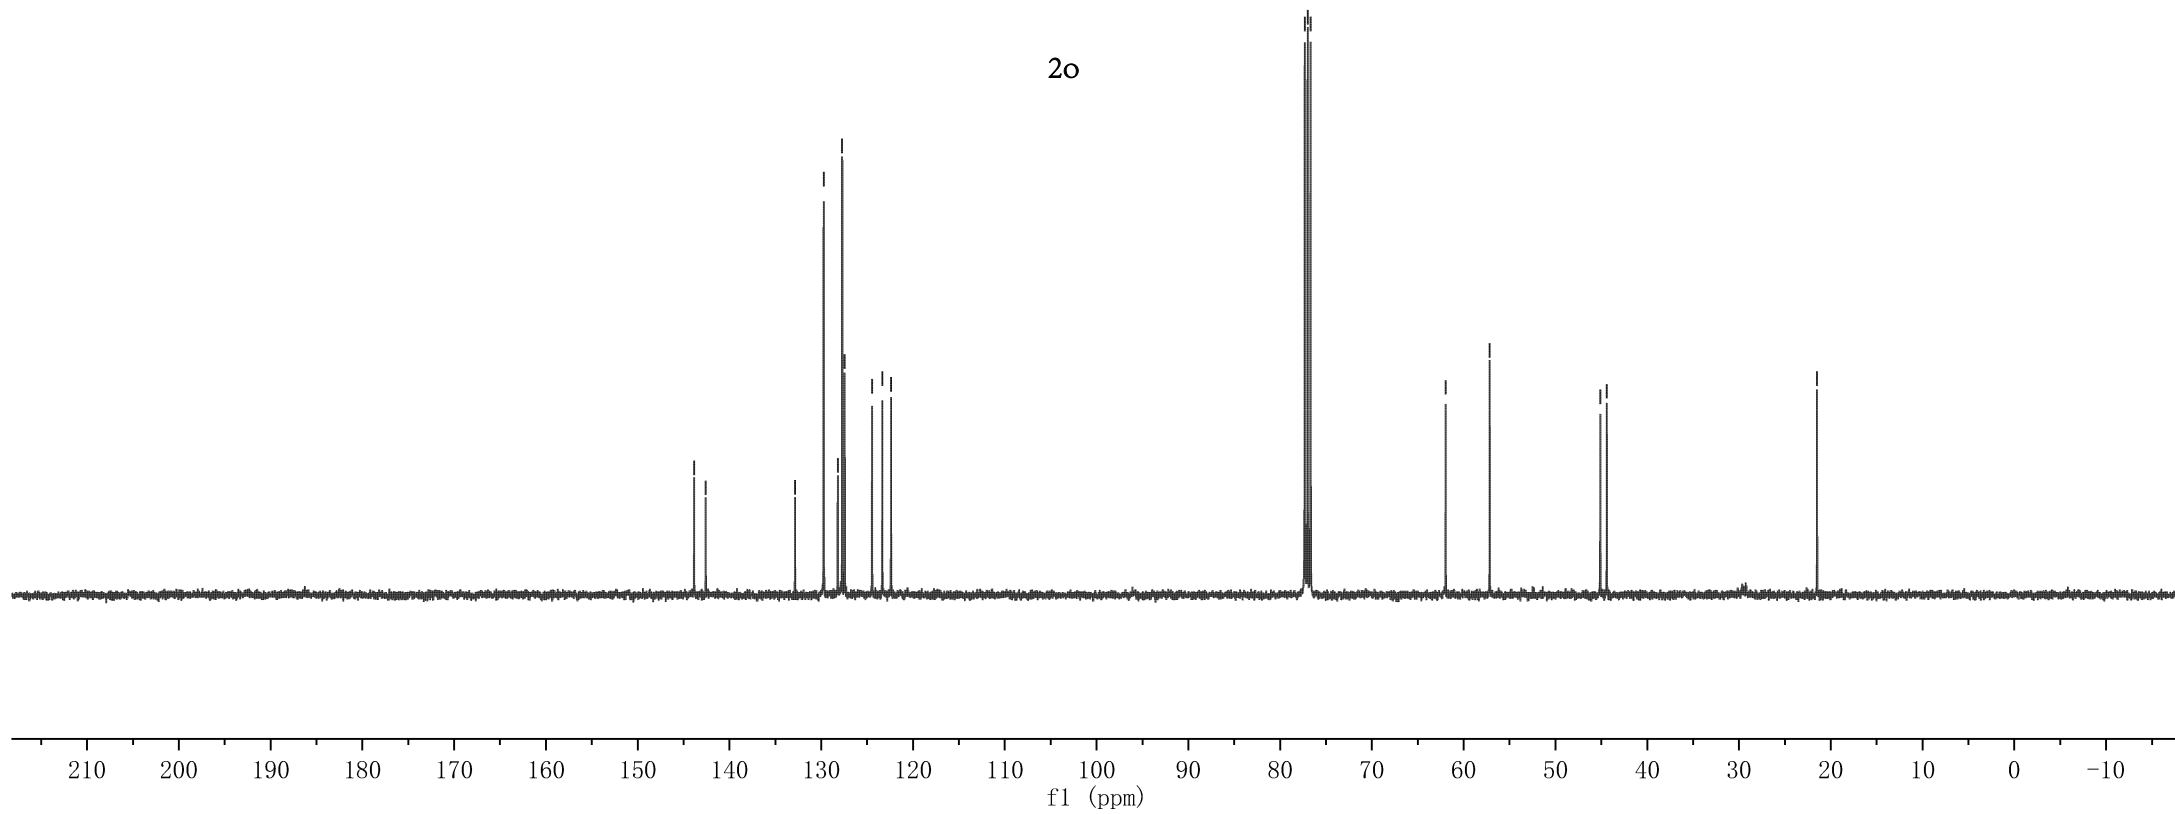

| Parameter                | Value               |
|--------------------------|---------------------|
| 1 Title                  | qlj-11-41-3-H       |
| 2 Origin                 | Bruker BioSpin GmbH |
| 3 Solvent                | CDC13               |
| 4 Temperature            | 295.2               |
| 5 Number of Scans        | 16                  |
| 6 Acquisition Time       | 3.9977              |
| 7 Acquisition Date       | 2025-06-24T07:38:18 |
| 8 Spectrometer Frequency | 400.25              |
| 9 Spectral Width         | 8196.7              |
| 10 Lowest Frequency      | -1636.6             |
| 11 Nucleus               | <sup>1</sup> H      |
| 12 Acquired Size         | 32768               |
| 13 Spectral Size         | 65536               |

7.724 7.704 7.633 7.344 7.325 7.260 6.449 6.447 5.951 5.945 5.940 5.934 5.776 4.277 4.248 4.155 4.144 4.142 4.101 3.816 3.619 3.246 3.203 2.427 2.407 2.401

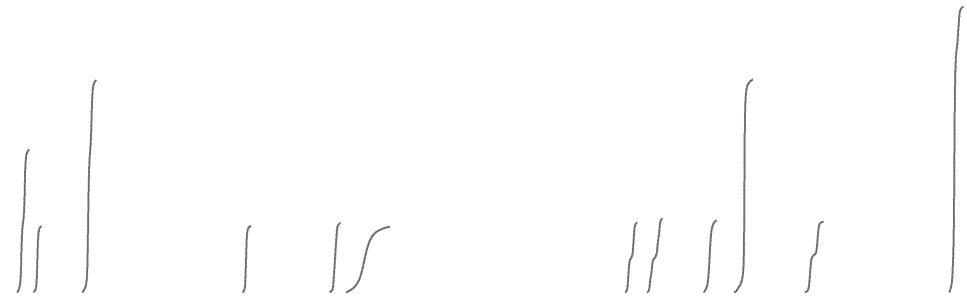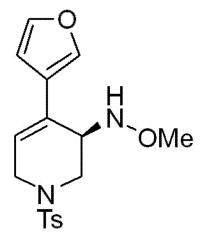

2p

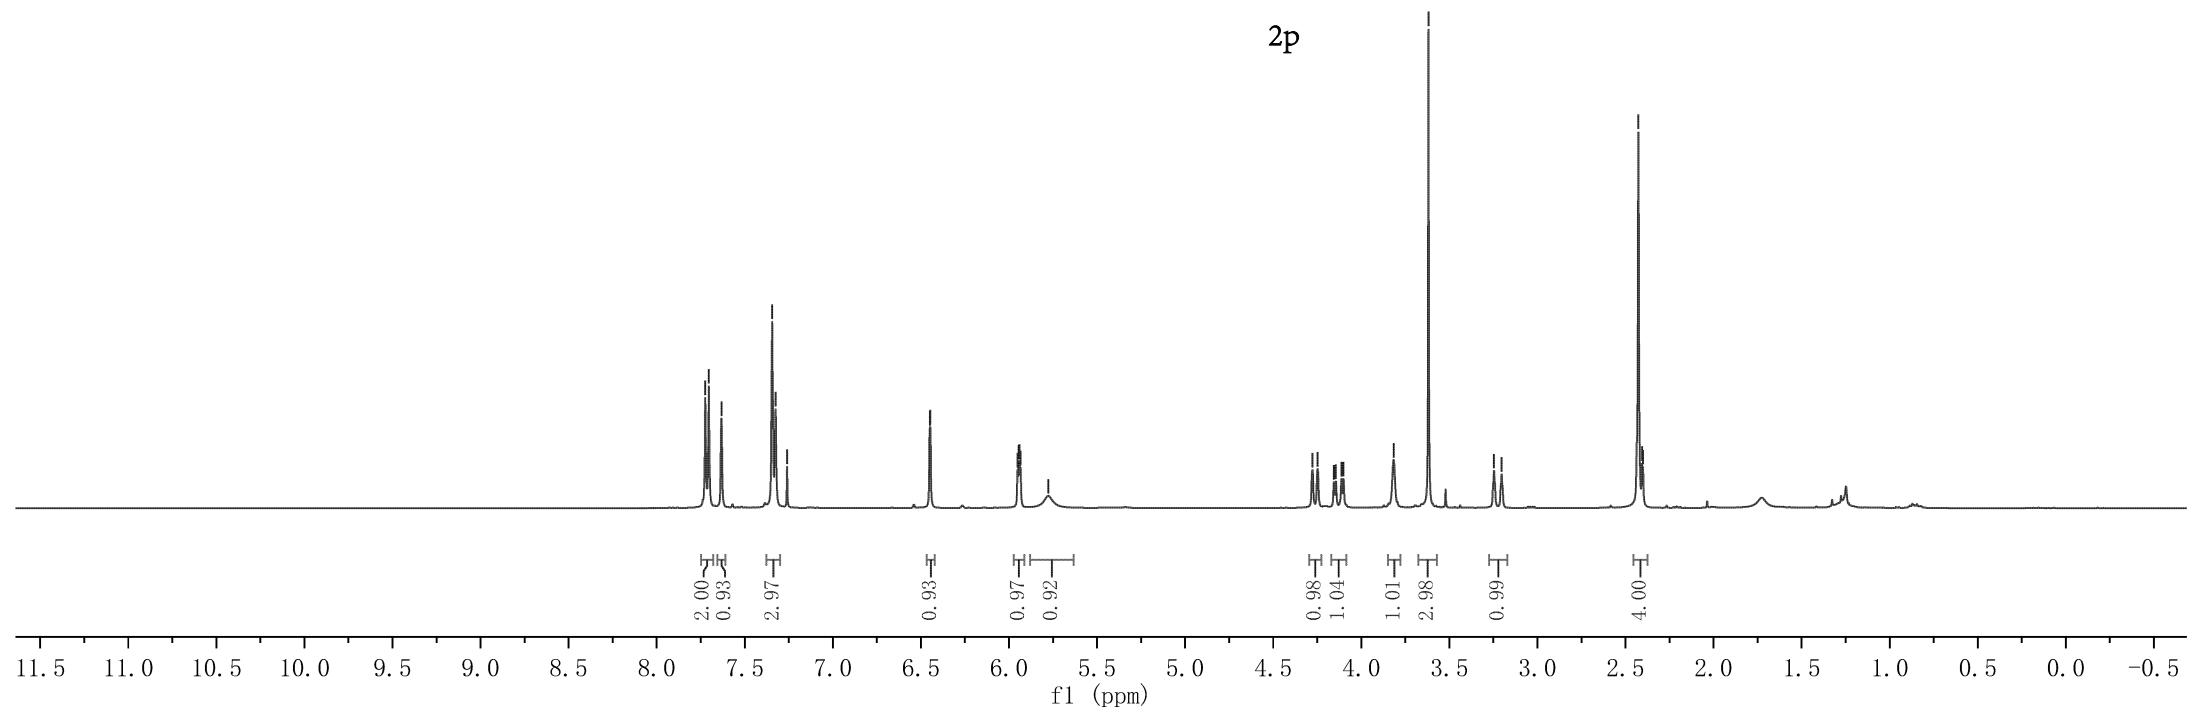

| Parameter                | Value               |
|--------------------------|---------------------|
| 1 Title                  | qlj-11-41-3-C       |
| 2 Origin                 | Bruker BioSpin GmbH |
| 3 Solvent                | CDC13               |
| 4 Temperature            | 296.0               |
| 5 Number of Scans        | 250                 |
| 6 Acquisition Time       | 1.3763              |
| 7 Acquisition Date       | 2025-06-24T07:53:01 |
| 8 Spectrometer Frequency | 100.64              |
| 9 Spectral Width         | 23809.5             |
| 10 Lowest Frequency      | -1847.5             |
| 11 Nucleus               | 13C                 |
| 12 Acquired Size         | 32768               |
| 13 Spectral Size         | 32768               |

143.80 143.31 139.02 132.89 129.70 127.71 125.86 124.72 121.67 107.53 77.32 77.00 76.68 61.88 56.74 45.11 44.33 21.48

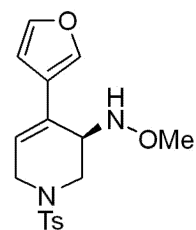

2p

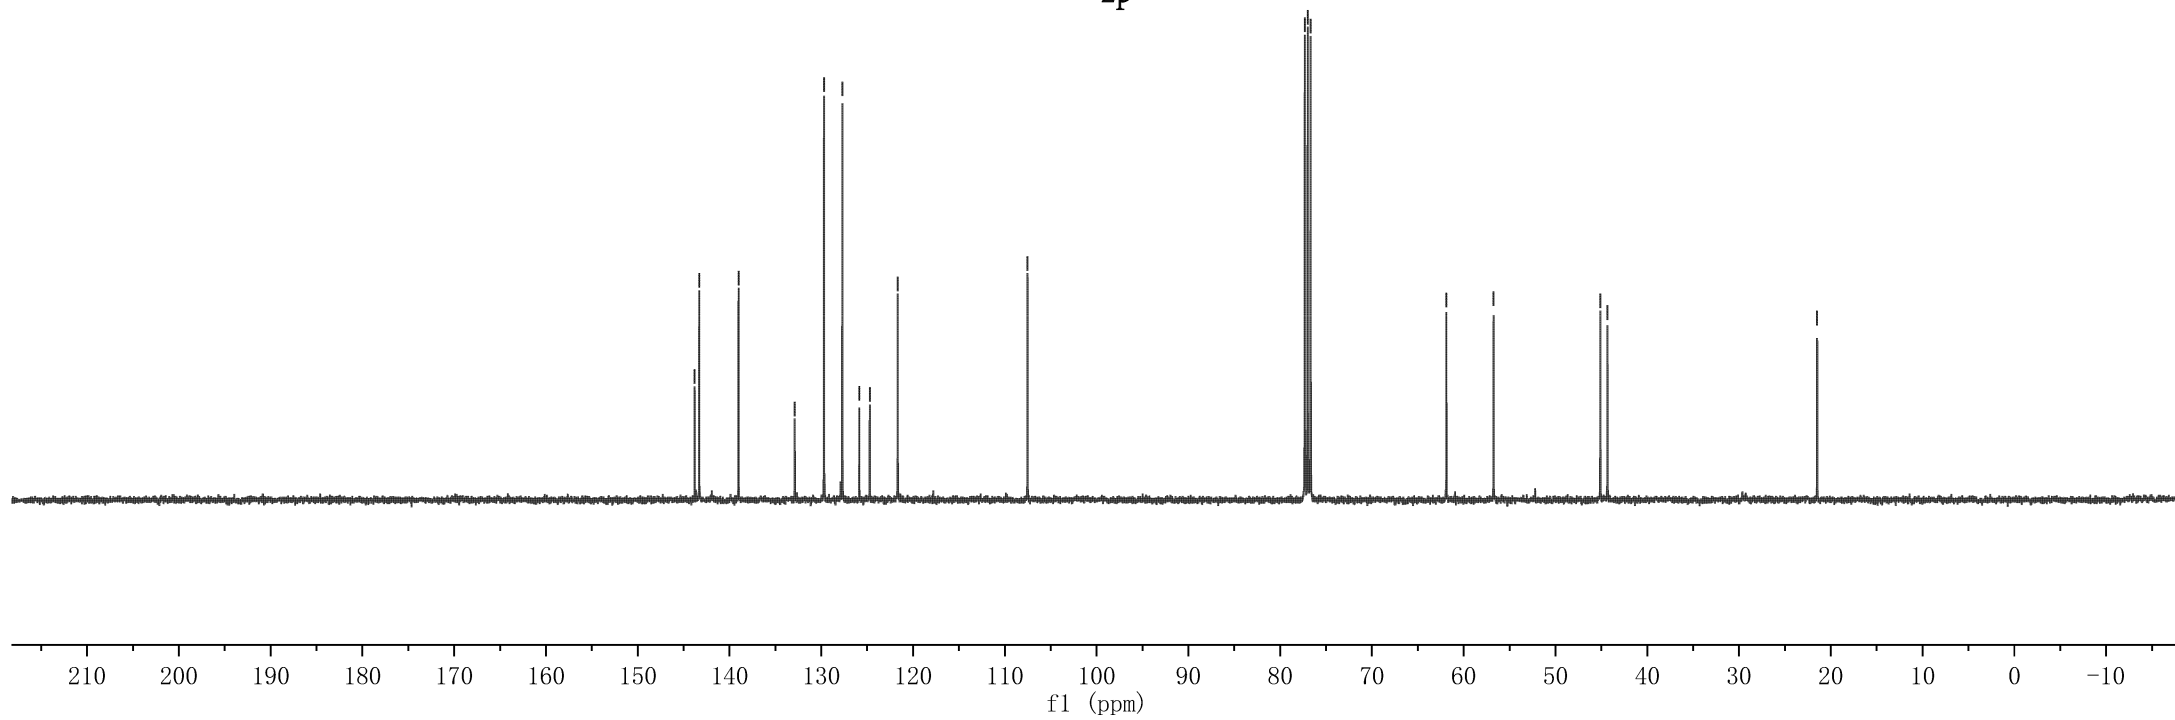

| Parameter                | Value               |
|--------------------------|---------------------|
| 1 Title                  | qlj-11-45-1-H       |
| 2 Origin                 | Bruker BioSpin GmbH |
| 3 Solvent                | CDC13               |
| 4 Temperature            | 296.0               |
| 5 Number of Scans        | 16                  |
| 6 Acquisition Time       | 3.9977              |
| 7 Acquisition Date       | 2025-06-26T17:24:15 |
| 8 Spectrometer Frequency | 400.25              |
| 9 Spectral Width         | 8196.7              |
| 10 Lowest Frequency      | -1701.9             |
| 11 Nucleus               | 1H                  |
| 12 Acquired Size         | 32768               |
| 13 Spectral Size         | 65536               |

7.579 7.573 7.557 7.542 7.536 7.525 7.520 7.314 7.310 7.293 7.196 7.193 7.189 7.176 7.157 7.139 7.128 7.122 7.096 5.930 5.924 5.919 5.913 5.516 4.123 4.119 4.093 4.089 4.029 4.018 3.986 3.975 3.911 3.432 3.203 3.198 3.193 3.159 3.154 3.149 2.436 2.430 2.406 2.400

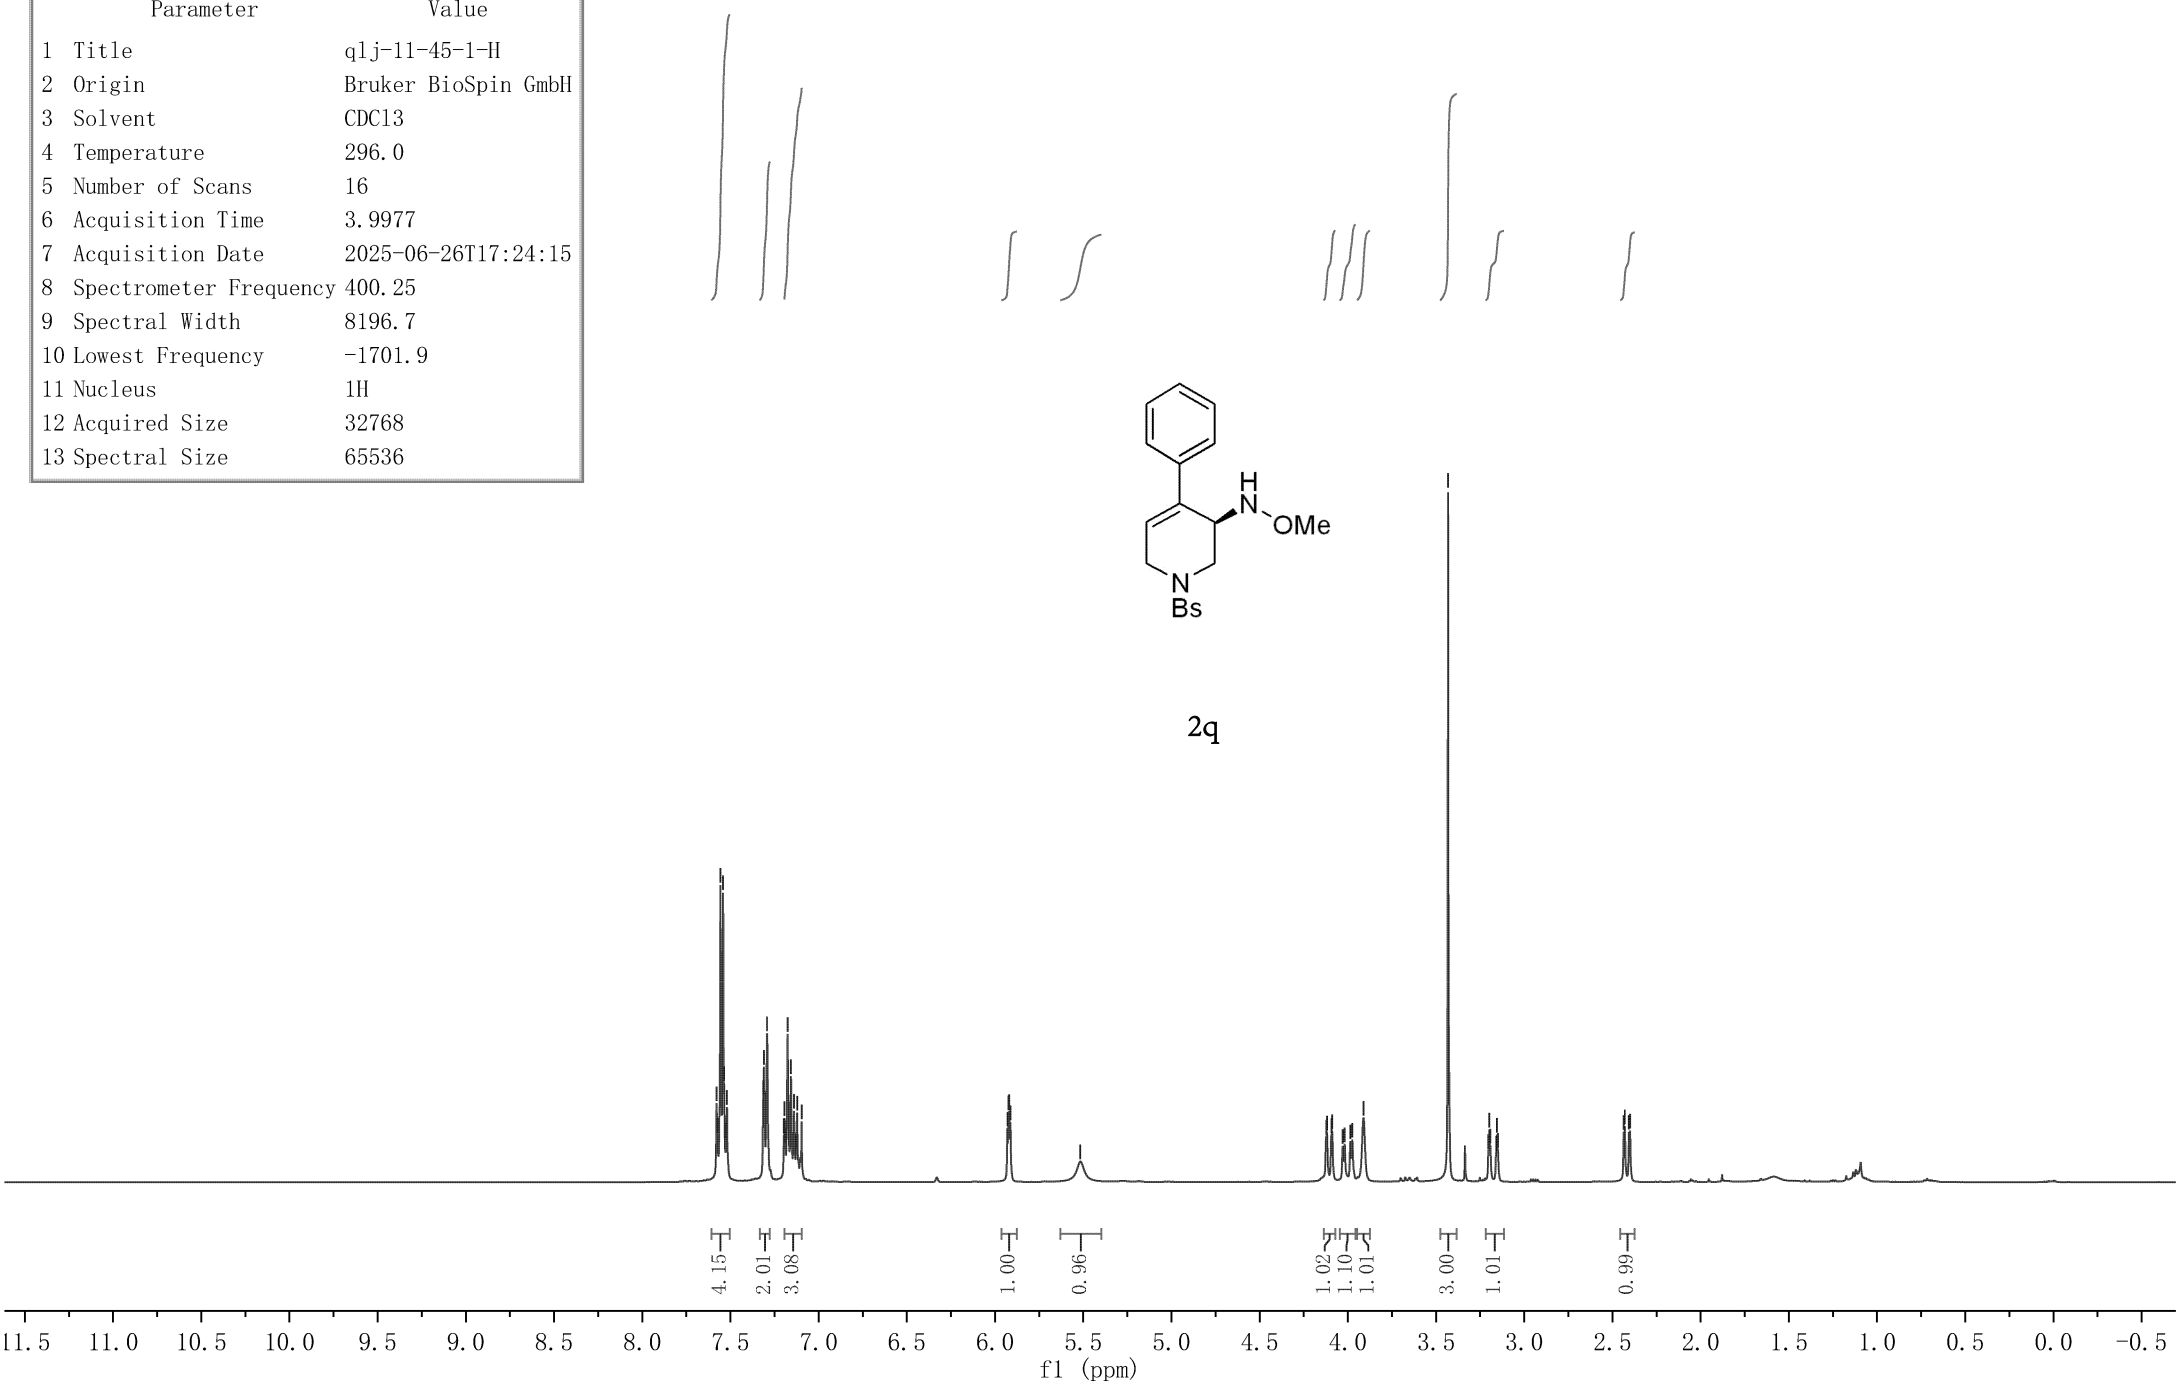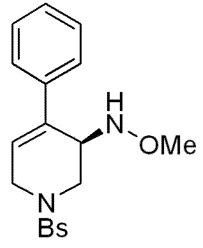

2q

| Parameter                | Value               |
|--------------------------|---------------------|
| 1 Title                  | qlj-11-45-1-C       |
| 2 Origin                 | Bruker BioSpin GmbH |
| 3 Solvent                | CDC13               |
| 4 Temperature            | 296.7               |
| 5 Number of Scans        | 200                 |
| 6 Acquisition Time       | 1.3763              |
| 7 Acquisition Date       | 2025-06-26T17:37:11 |
| 8 Spectrometer Frequency | 100.64              |
| 9 Spectral Width         | 23809.5             |
| 10 Lowest Frequency      | -1850.6             |
| 11 Nucleus               | <sup>13</sup> C     |
| 12 Acquired Size         | 32768               |
| 13 Spectral Size         | 32768               |

138.27  
135.13  
133.85  
132.40  
129.15  
128.62  
128.00  
127.97  
125.57  
123.69

77.32  
77.00  
76.68

62.04  
56.35

45.32  
44.72

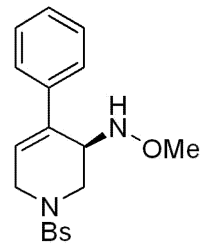

2q

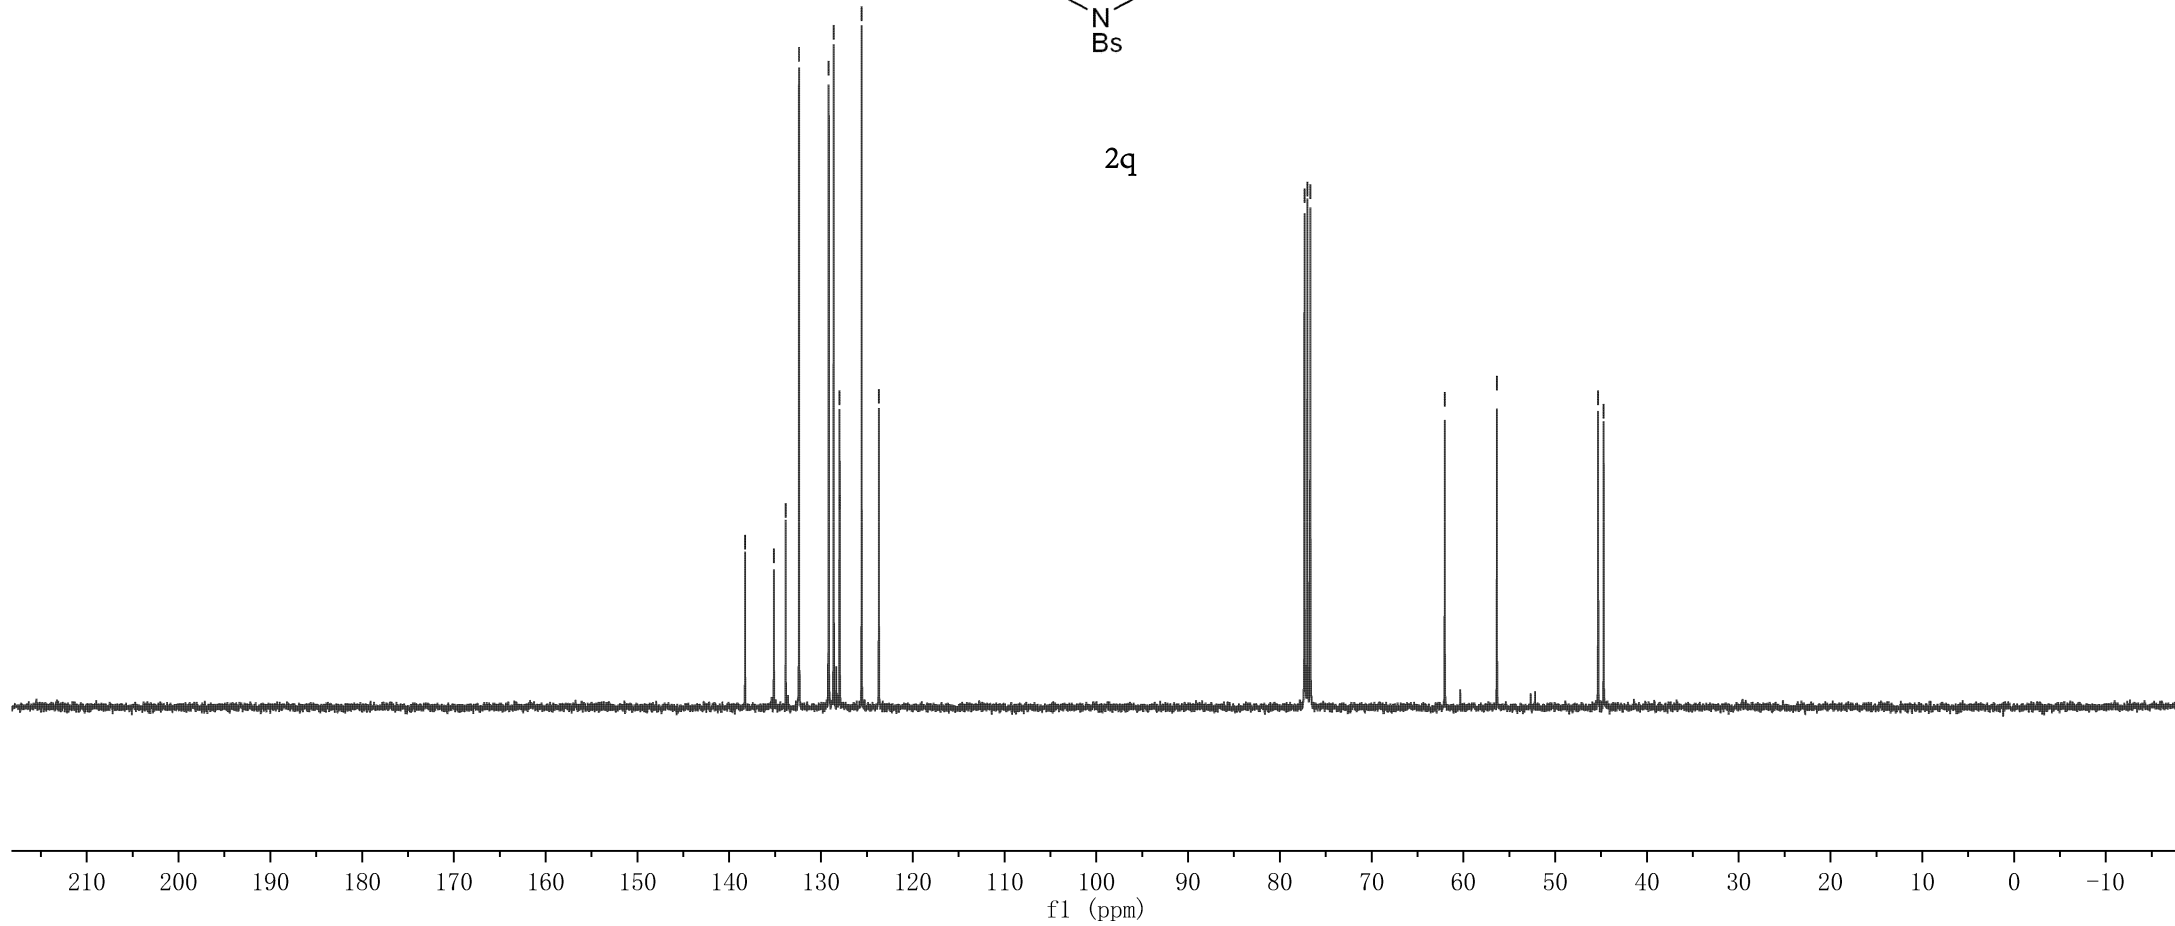

| Parameter                | Value               |
|--------------------------|---------------------|
| 1 Title                  | qlj-11-45-2-H       |
| 2 Origin                 | Bruker BioSpin GmbH |
| 3 Solvent                | CDC13               |
| 4 Temperature            | 296.1               |
| 5 Number of Scans        | 16                  |
| 6 Acquisition Time       | 3.9977              |
| 7 Acquisition Date       | 2025-06-26T17:42:11 |
| 8 Spectrometer Frequency | 400.25              |
| 9 Spectral Width         | 8196.7              |
| 10 Lowest Frequency      | -1700.8             |
| 11 Nucleus               | 1H                  |
| 12 Acquired Size         | 32768               |
| 13 Spectral Size         | 65536               |

7.643 7.621 7.318 7.300 7.187 7.170 7.151 7.130 7.113 7.099 6.866 6.844 5.936 5.930 5.925 5.919 5.573 4.110 4.106 4.080 4.076 4.010 3.999 3.967 3.956 3.906 3.710 3.434 3.167 3.123 2.387 2.381 2.357 2.352

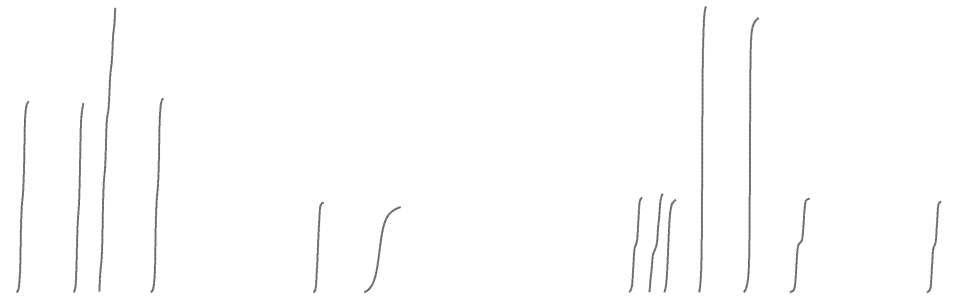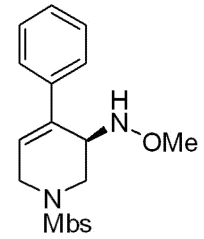

2r

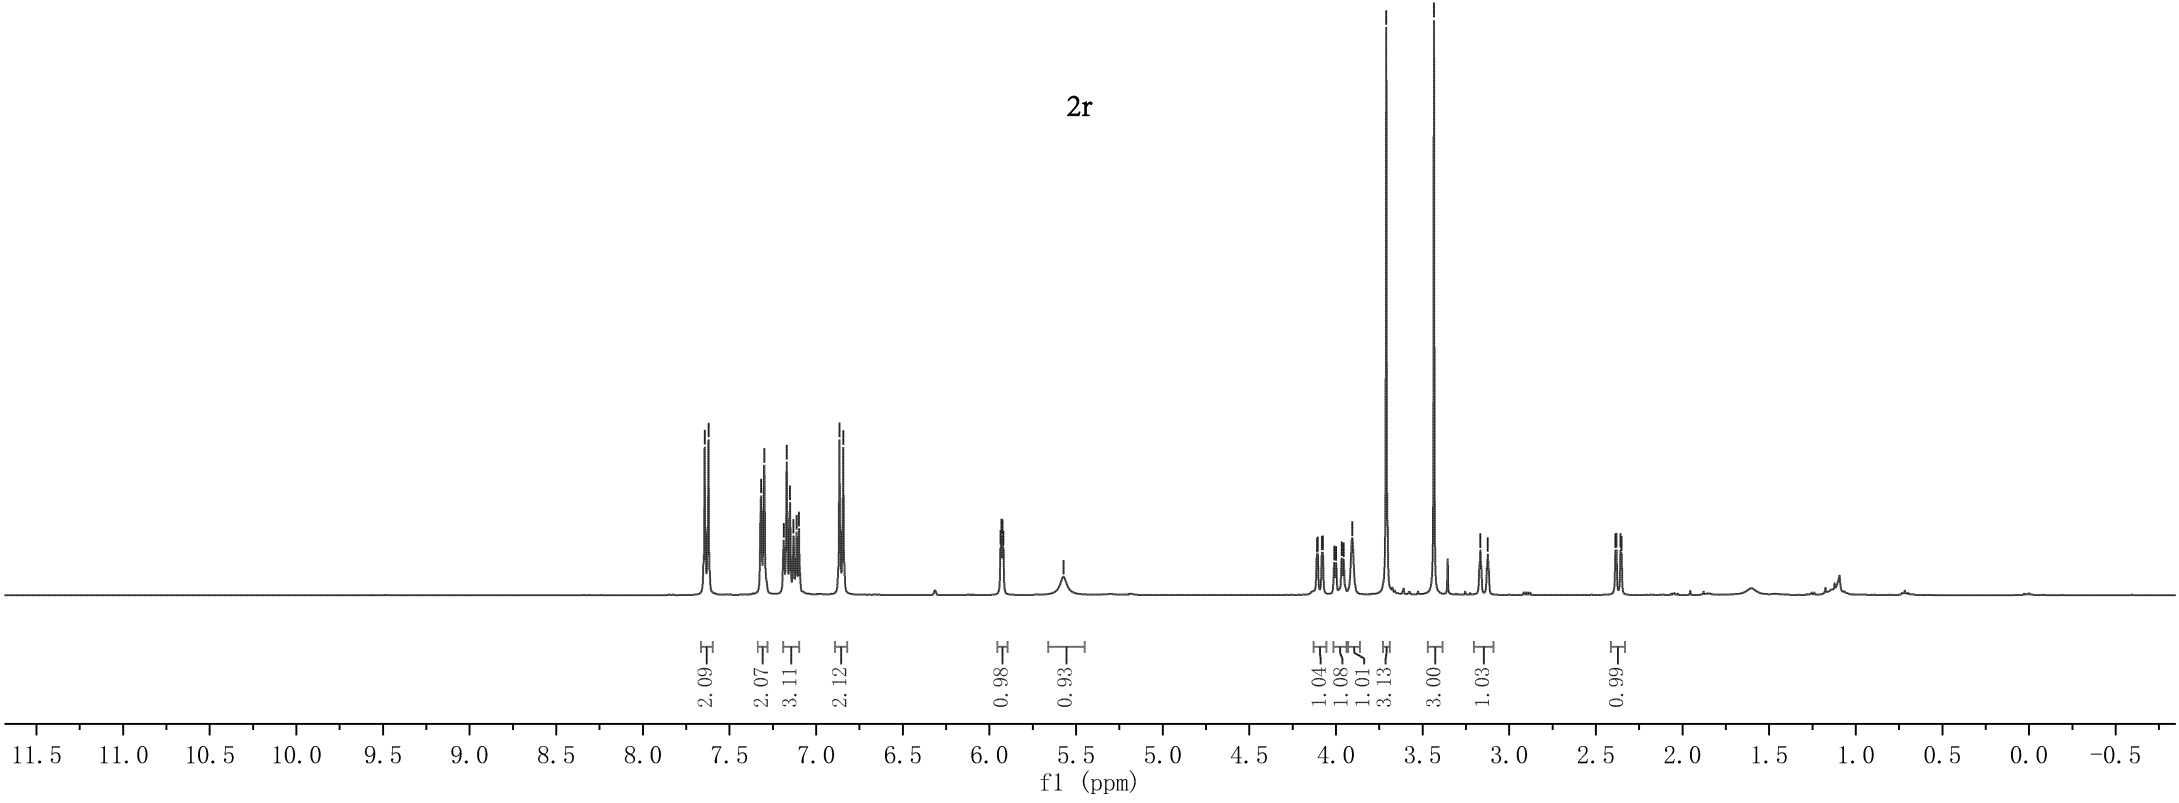

| Parameter                | Value               |
|--------------------------|---------------------|
| 1 Title                  | qlj-11-45-2-C       |
| 2 Origin                 | Bruker BioSpin GmbH |
| 3 Solvent                | CDC13               |
| 4 Temperature            | 296.8               |
| 5 Number of Scans        | 200                 |
| 6 Acquisition Time       | 1.3763              |
| 7 Acquisition Date       | 2025-06-26T17:54:02 |
| 8 Spectrometer Frequency | 100.64              |
| 9 Spectral Width         | 23809.5             |
| 10 Lowest Frequency      | -1850.1             |
| 11 Nucleus               | 13C                 |
| 12 Acquired Size         | 32768               |
| 13 Spectral Size         | 32768               |

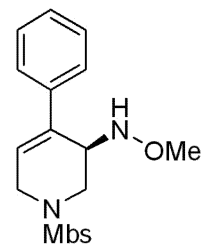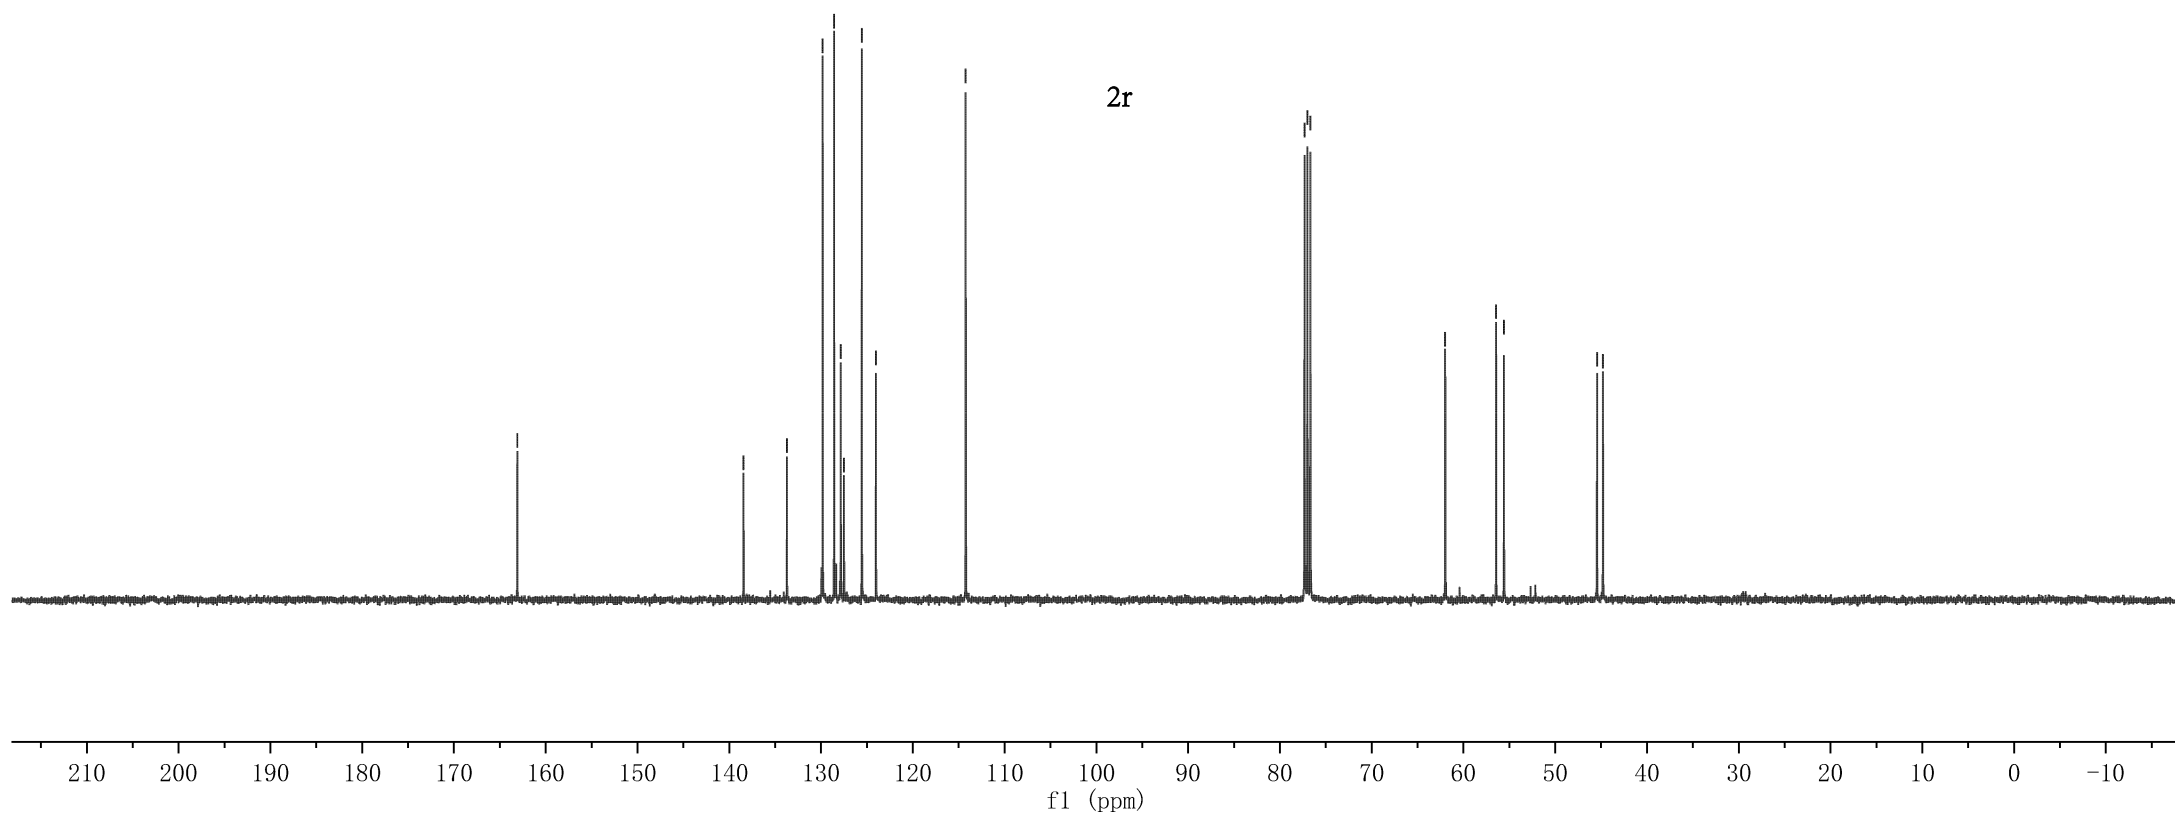

| Parameter                | Value               |
|--------------------------|---------------------|
| 1 Title                  | qlj-11-39-3-H       |
| 2 Origin                 | Bruker BioSpin GmbH |
| 3 Solvent                | CDC13               |
| 4 Temperature            | 295.2               |
| 5 Number of Scans        | 16                  |
| 6 Acquisition Time       | 3.9977              |
| 7 Acquisition Date       | 2025-06-25T17:43:01 |
| 8 Spectrometer Frequency | 400.25              |
| 9 Spectral Width         | 8196.7              |
| 10 Lowest Frequency      | -1636.9             |
| 11 Nucleus               | <sup>1</sup> H      |
| 12 Acquired Size         | 32768               |
| 13 Spectral Size         | 65536               |

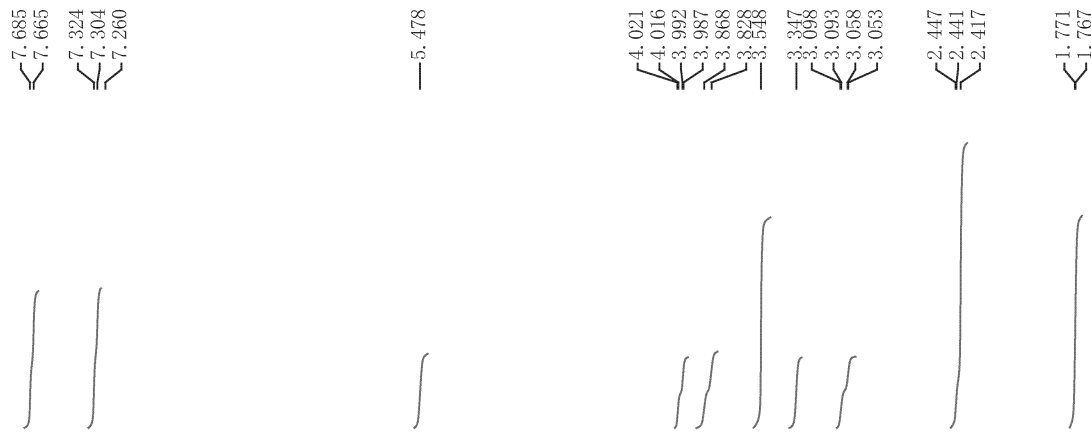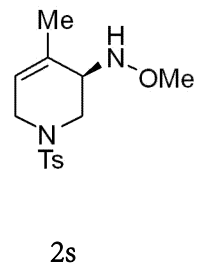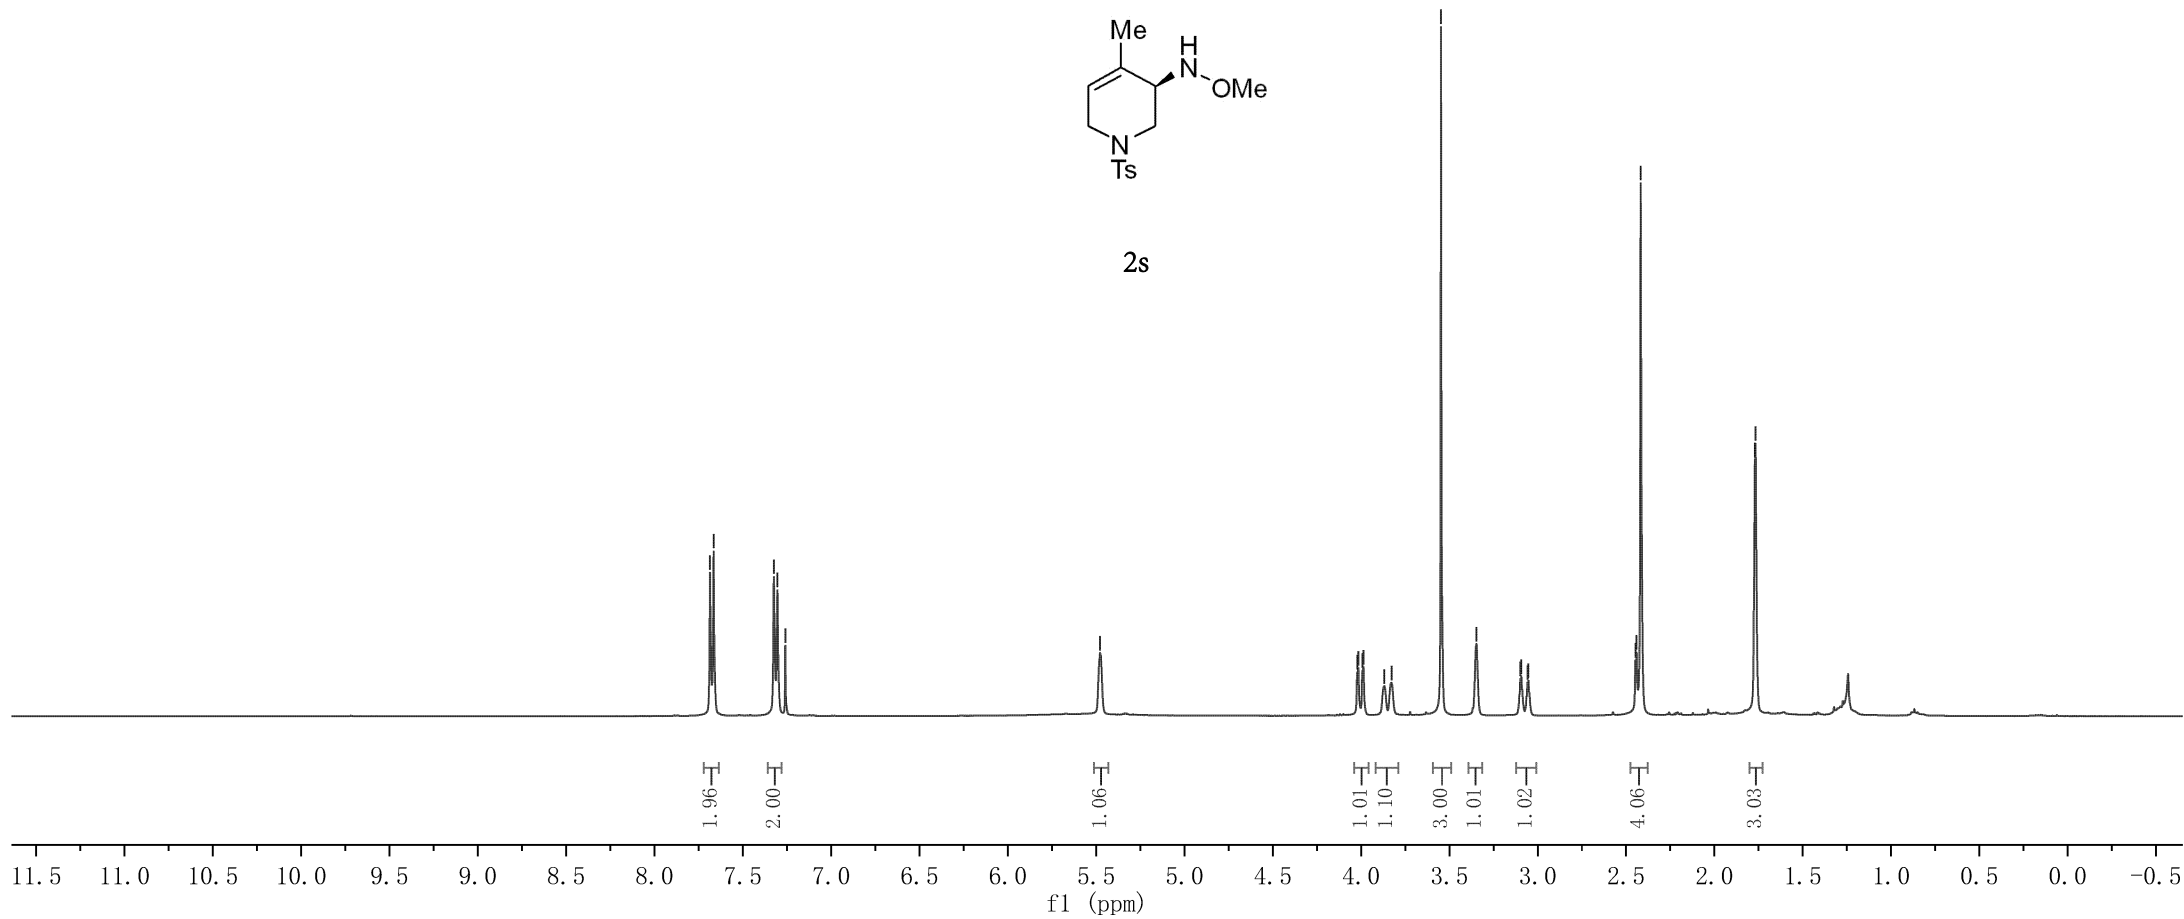



| Parameter                | Value               |
|--------------------------|---------------------|
| 1 Title                  | qlj-11-48-3-H       |
| 2 Origin                 | Bruker BioSpin GmbH |
| 3 Solvent                | CDC13               |
| 4 Temperature            | 295.9               |
| 5 Number of Scans        | 16                  |
| 6 Acquisition Time       | 3.9977              |
| 7 Acquisition Date       | 2025-06-30T15:34:42 |
| 8 Spectrometer Frequency | 400.25              |
| 9 Spectral Width         | 8196.7              |
| 10 Lowest Frequency      | -1707.1             |
| 11 Nucleus               | 1H                  |
| 12 Acquired Size         | 32768               |
| 13 Spectral Size         | 65536               |

7.599 7.578 7.213 7.206 7.189 7.169 7.160 7.104 7.100 7.082 7.071 5.962 5.895 5.891 5.884 5.592 4.679 4.650 4.566 4.536 4.231 4.227 4.202 4.198 4.006 3.995 3.962 3.952 3.817 3.152 3.108 2.366 2.360 2.336 2.331 2.267

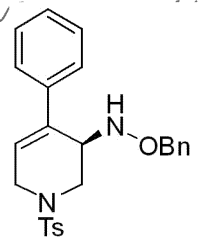

2t

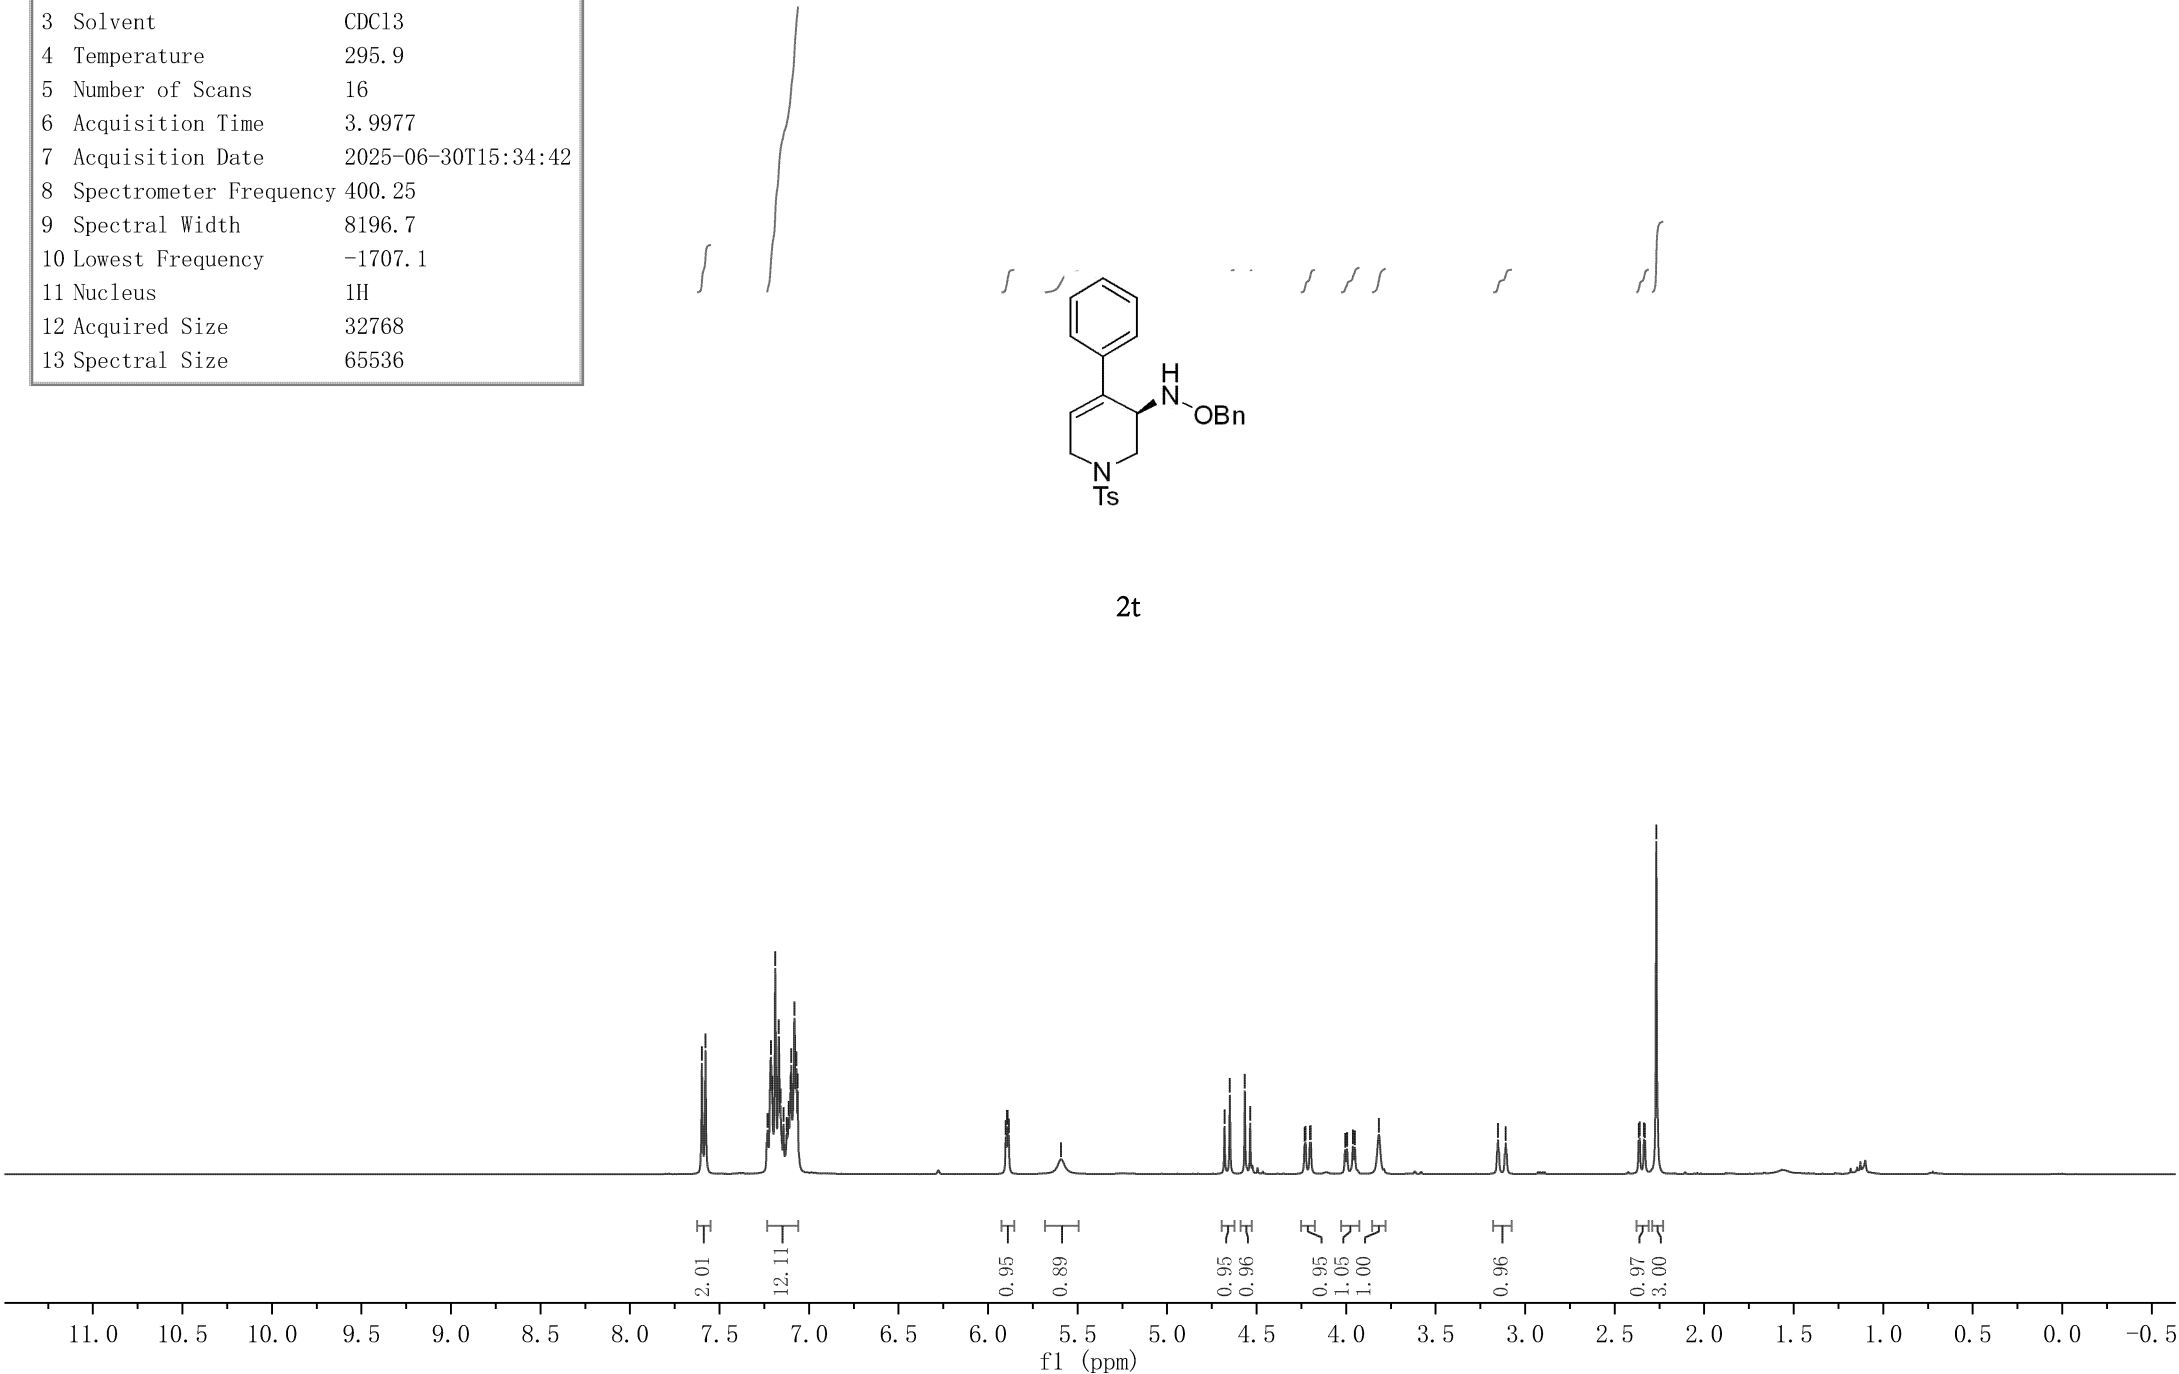

| Parameter                | Value               |
|--------------------------|---------------------|
| 1 Title                  | qlj-11-48-3-C       |
| 2 Origin                 | Bruker BioSpin GmbH |
| 3 Solvent                | CDC13               |
| 4 Temperature            | 296.6               |
| 5 Number of Scans        | 250                 |
| 6 Acquisition Time       | 1.3763              |
| 7 Acquisition Date       | 2025-06-30T15:49:24 |
| 8 Spectrometer Frequency | 100.64              |
| 9 Spectral Width         | 23809.5             |
| 10 Lowest Frequency      | -1852.1             |
| 11 Nucleus               | <sup>13</sup> C     |
| 12 Acquired Size         | 32768               |
| 13 Spectral Size         | 32768               |

143.75  
138.23  
138.21  
133.70  
132.94  
129.69  
128.55  
128.44  
128.27  
127.75  
127.67  
125.52  
123.68

77.32  
77.00  
76.68  
76.22

56.93

45.38  
44.71

21.48

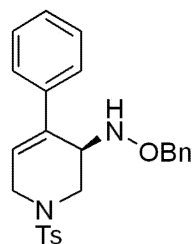

2t

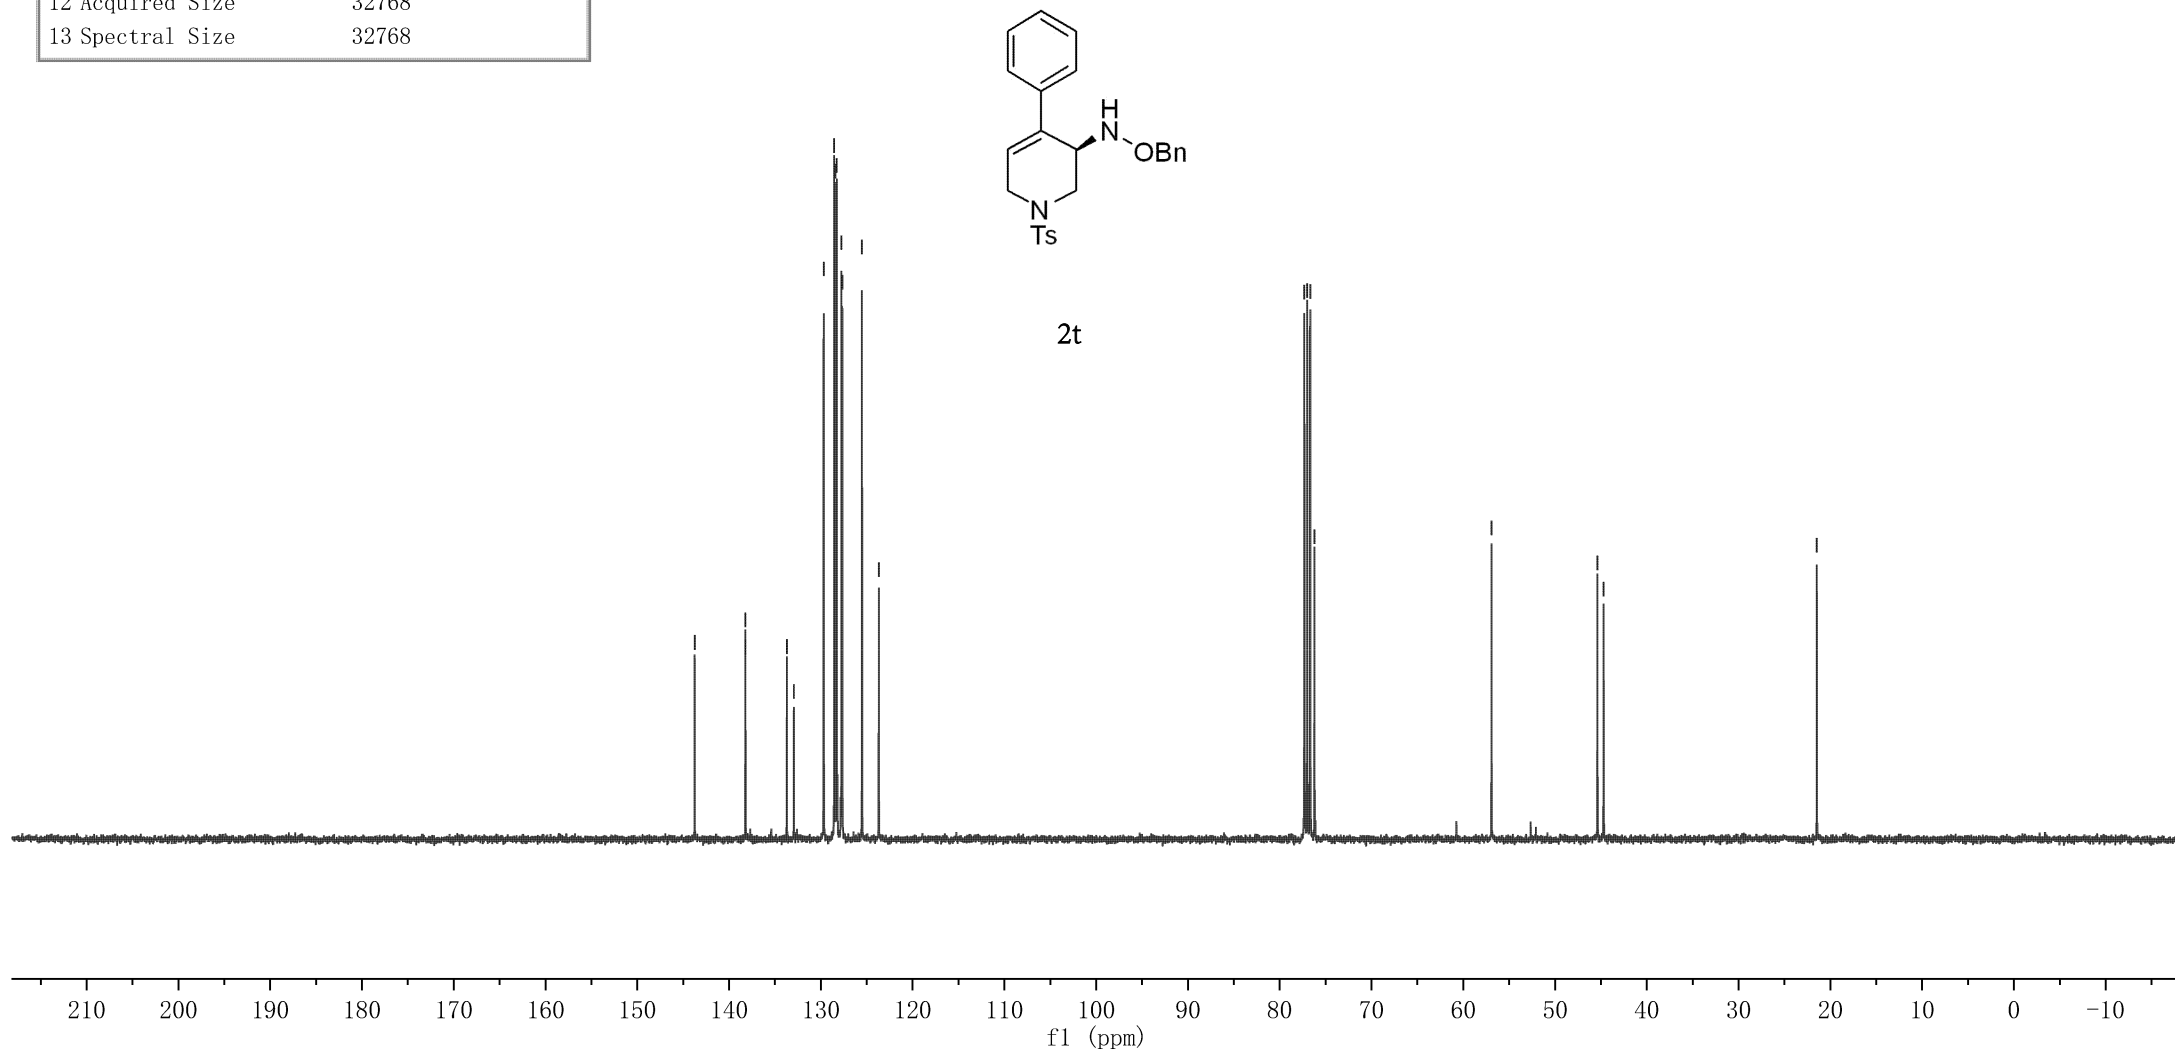

| Parameter                | Value               |
|--------------------------|---------------------|
| 1 Title                  | qlj-11-154-H        |
| 2 Origin                 | Bruker BioSpin GmbH |
| 3 Solvent                | CDC13               |
| 4 Temperature            | 292.3               |
| 5 Number of Scans        | 16                  |
| 6 Acquisition Time       | 3.9977              |
| 7 Acquisition Date       | 2026-03-23T15:49:41 |
| 8 Spectrometer Frequency | 400.25              |
| 9 Spectral Width         | 8196.7              |
| 10 Lowest Frequency      | -1636.6             |
| 11 Nucleus               | <sup>1</sup> H      |
| 12 Acquired Size         | 32768               |
| 13 Spectral Size         | 65536               |

7.760 7.740 7.460 7.442 7.361 7.348 7.341 7.332 7.312 7.295 7.260 7.239 7.229 6.089 6.085 6.079 4.304 4.300 4.275 4.271 4.190 4.179 4.146 4.136 4.090 3.849 3.832 3.815 3.797 3.343 3.299 2.599 2.595 2.570 2.566 2.439 1.176 1.159 1.141

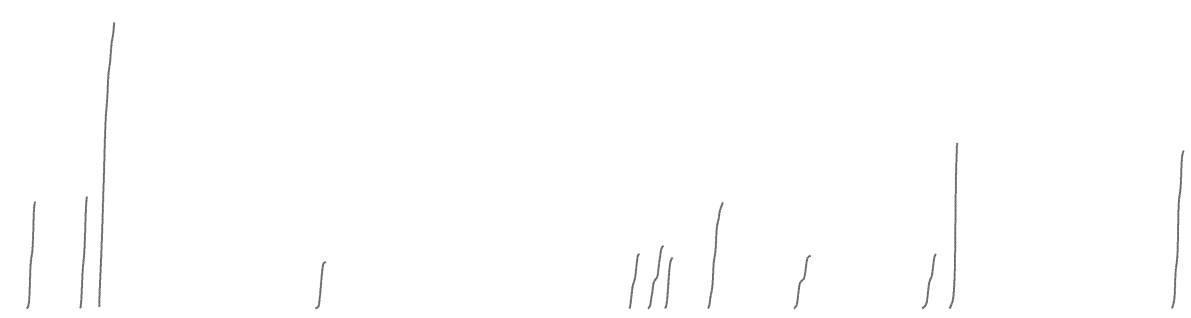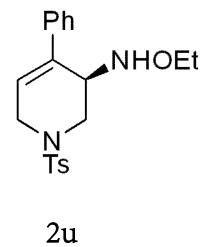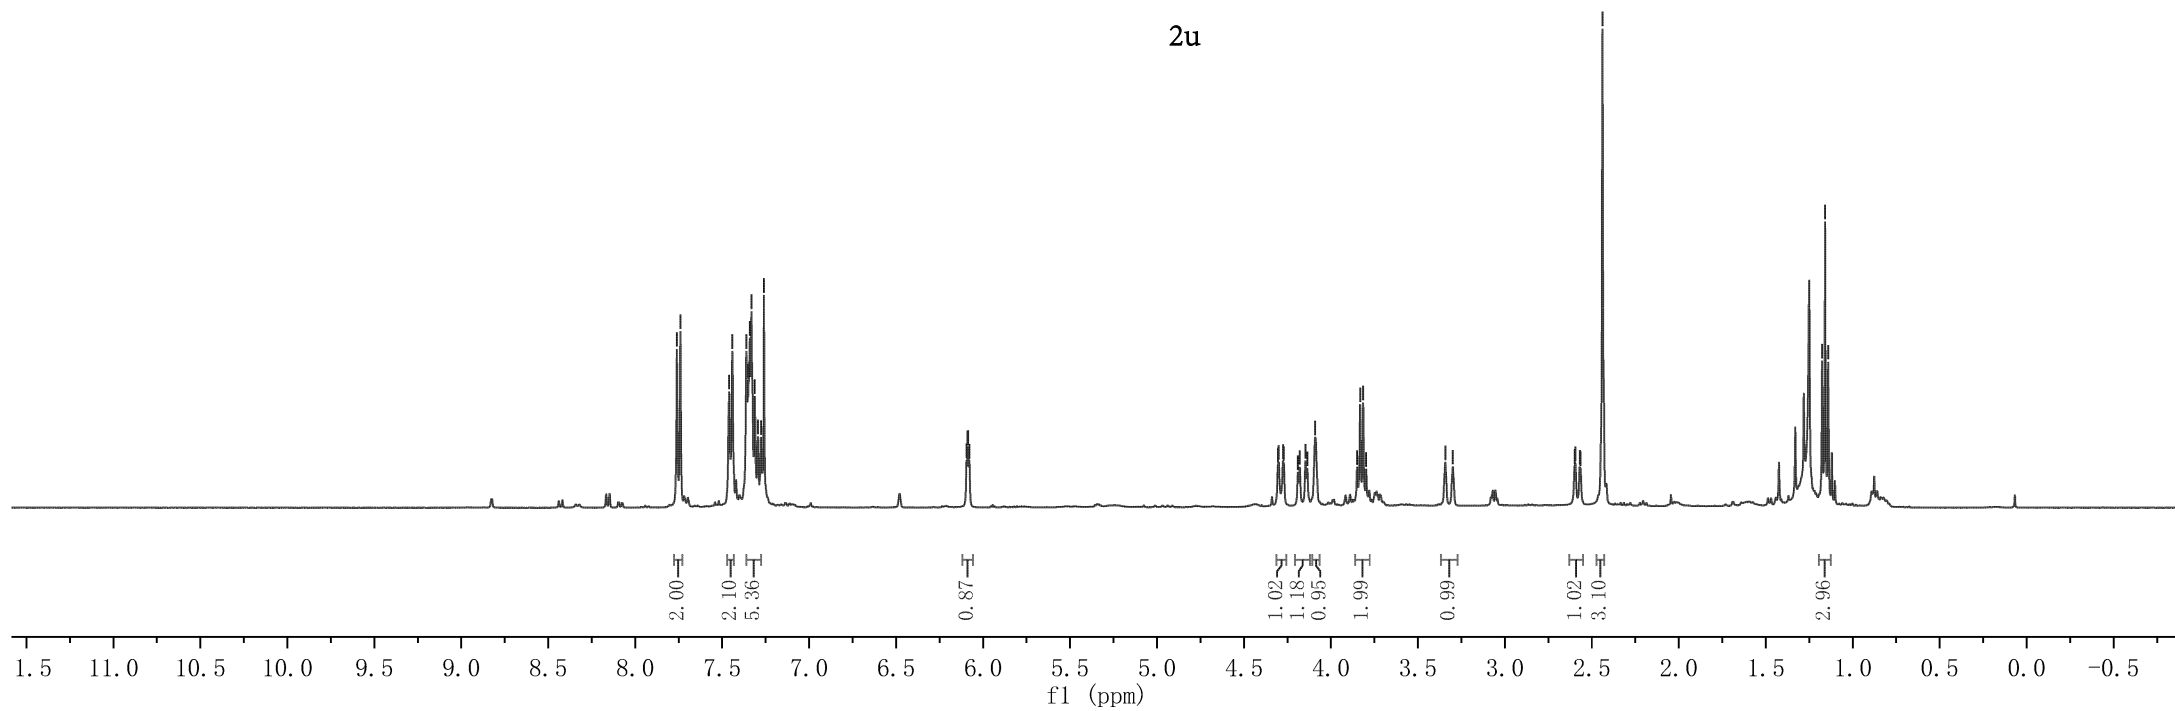

| Parameter                | Value               |
|--------------------------|---------------------|
| 1 Title                  | qlj-11-154-C        |
| 2 Origin                 | Bruker BioSpin GmbH |
| 3 Solvent                | CDC13               |
| 4 Temperature            | 293.0               |
| 5 Number of Scans        | 520                 |
| 6 Acquisition Time       | 1.3763              |
| 7 Acquisition Date       | 2026-03-23T16:19:51 |
| 8 Spectrometer Frequency | 100.64              |
| 9 Spectral Width         | 23809.5             |
| 10 Lowest Frequency      | -1846.0             |
| 11 Nucleus               | <sup>13</sup> C     |
| 12 Acquired Size         | 32768               |
| 13 Spectral Size         | 32768               |

143.82  
138.45  
133.68  
132.84  
129.73  
128.61  
127.92  
127.84  
125.71  
124.32

77.32  
77.00  
76.68

69.62

56.72

45.45  
44.83

21.53

14.22

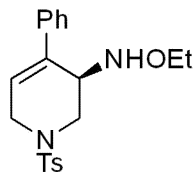

2u

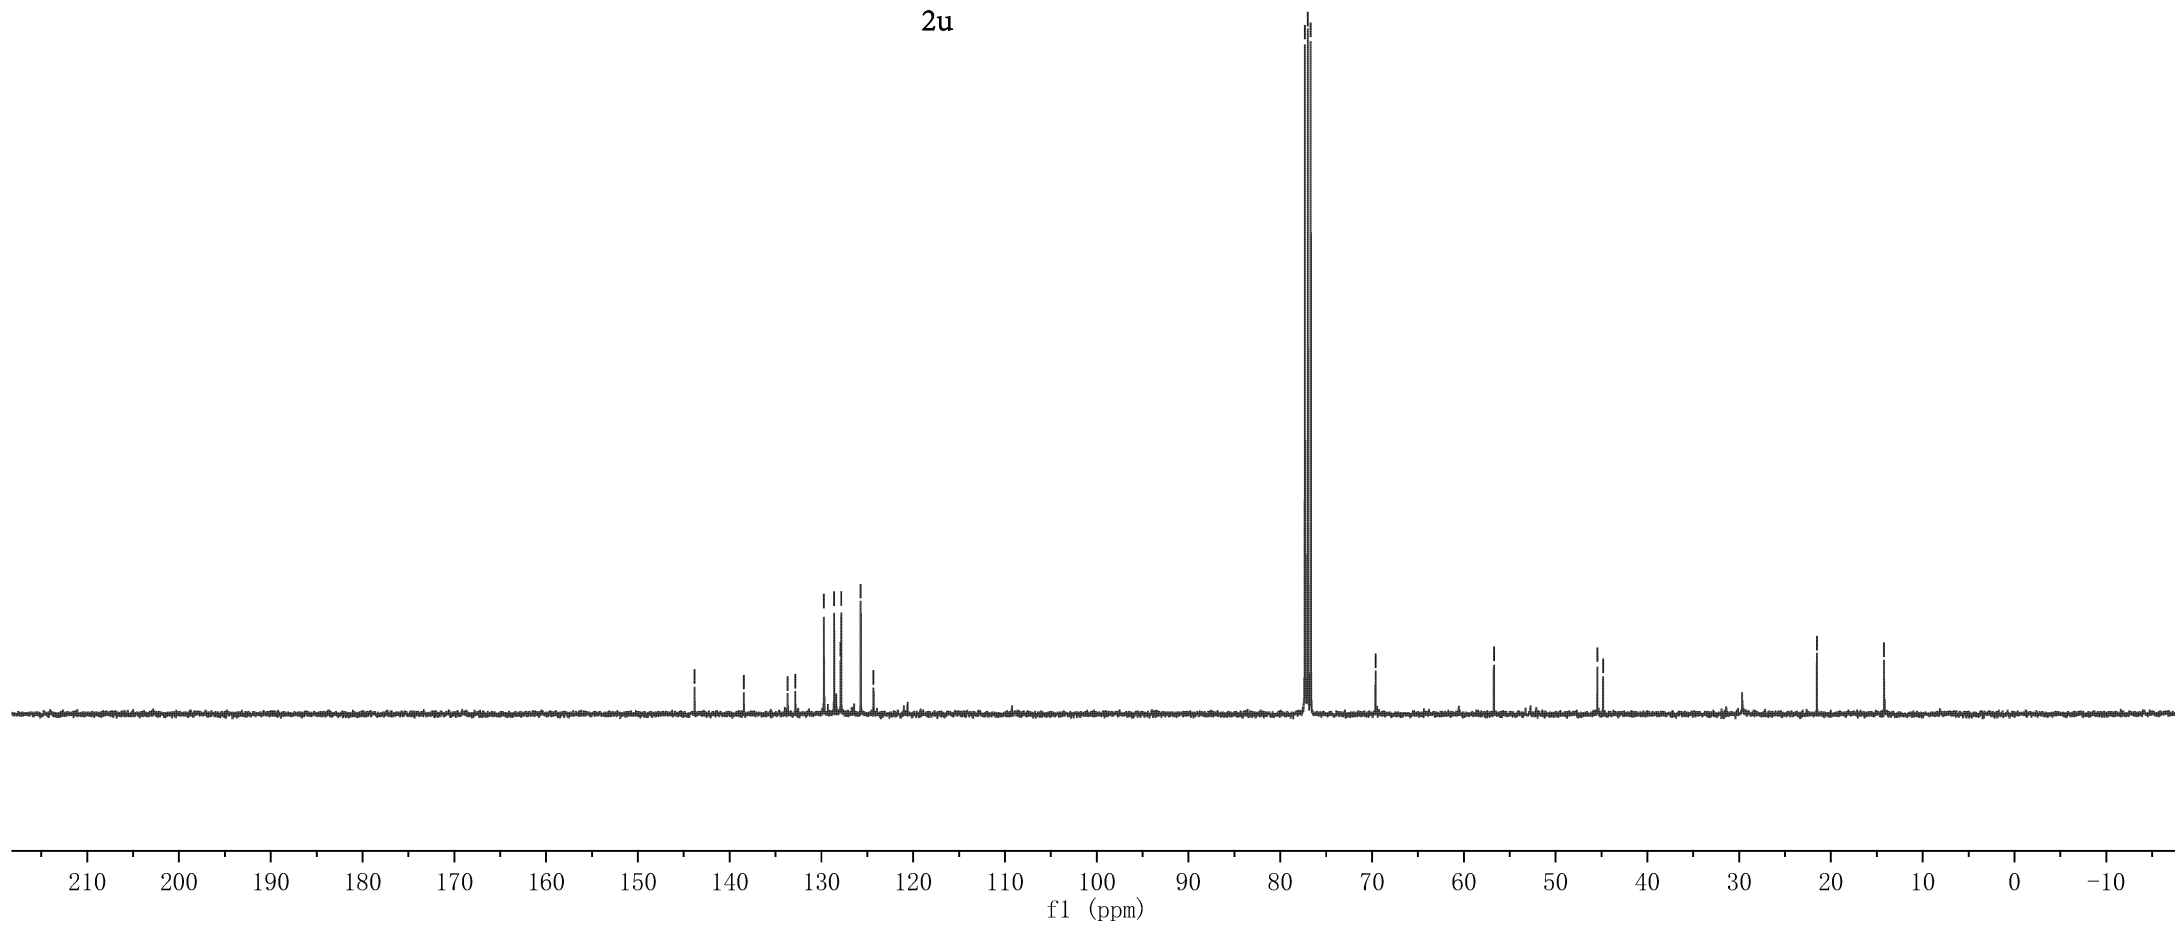

| Parameter                | Value               |
|--------------------------|---------------------|
| 1 Title                  | qlj-11-51-1-H       |
| 2 Origin                 | Bruker BioSpin GmbH |
| 3 Solvent                | CDC13               |
| 4 Temperature            | 295.7               |
| 5 Number of Scans        | 16                  |
| 6 Acquisition Time       | 3.9977              |
| 7 Acquisition Date       | 2025-07-04T13:24:12 |
| 8 Spectrometer Frequency | 400.25              |
| 9 Spectral Width         | 8196.7              |
| 10 Lowest Frequency      | -1636.4             |
| 11 Nucleus               | <sup>1</sup> H      |
| 12 Acquired Size         | 32768               |
| 13 Spectral Size         | 65536               |

7.774  
7.754  
7.457  
7.453  
7.436  
7.350  
7.331  
7.310  
7.306  
7.291  
7.277  
7.269  
6.033  
6.028  
6.022  
5.165  
4.480  
4.452  
4.147  
4.114  
4.104  
4.094  
3.389  
3.384  
3.379  
3.346  
3.341  
3.336  
2.551  
2.547  
2.522  
2.518  
2.437  
0.883  
0.063  
0.051

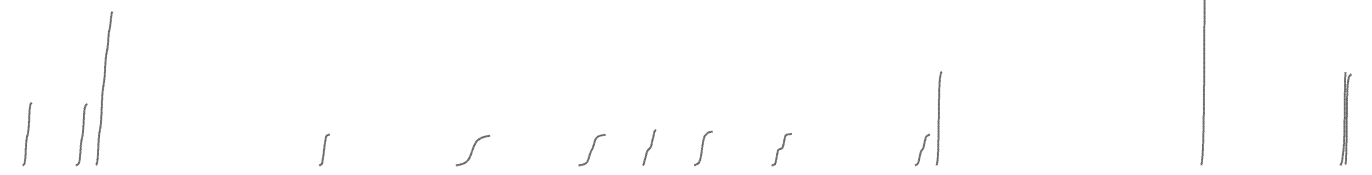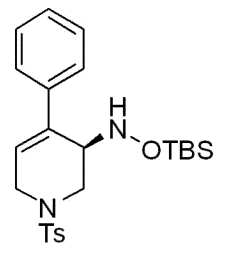

2v

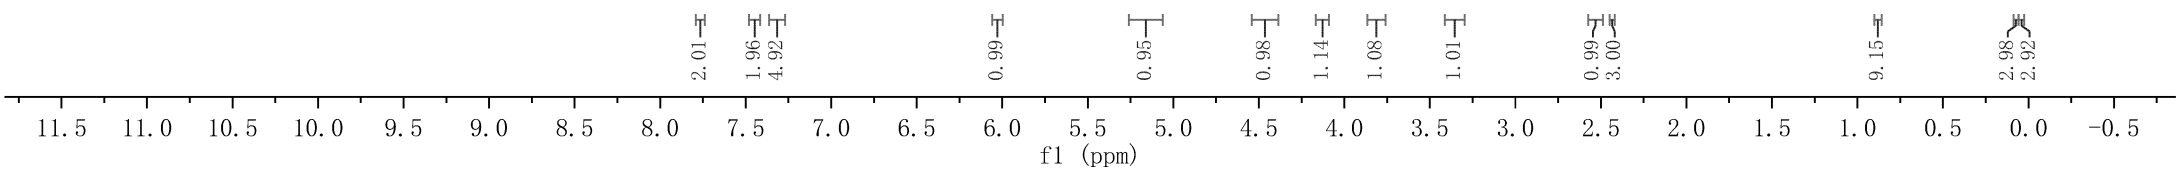

| Parameter                | Value               |
|--------------------------|---------------------|
| 1 Title                  | qlj-11-51-1-C       |
| 2 Origin                 | Bruker BioSpin GmbH |
| 3 Solvent                | CDC13               |
| 4 Temperature            | 296.5               |
| 5 Number of Scans        | 500                 |
| 6 Acquisition Time       | 1.3763              |
| 7 Acquisition Date       | 2025-07-04T13:53:47 |
| 8 Spectrometer Frequency | 100.64              |
| 9 Spectral Width         | 23809.5             |
| 10 Lowest Frequency      | -1845.3             |
| 11 Nucleus               | <sup>13</sup> C     |
| 12 Acquired Size         | 32768               |
| 13 Spectral Size         | 32768               |

143.73  
139.32  
134.80  
133.37  
129.69  
128.27  
127.82  
127.60  
126.05  
124.04

77.32  
77.00  
76.68

59.05

45.30  
43.73

26.17  
21.52  
17.90

-5.26  
-5.36

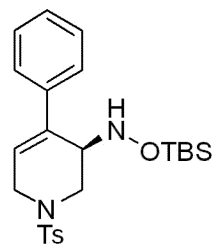

2v

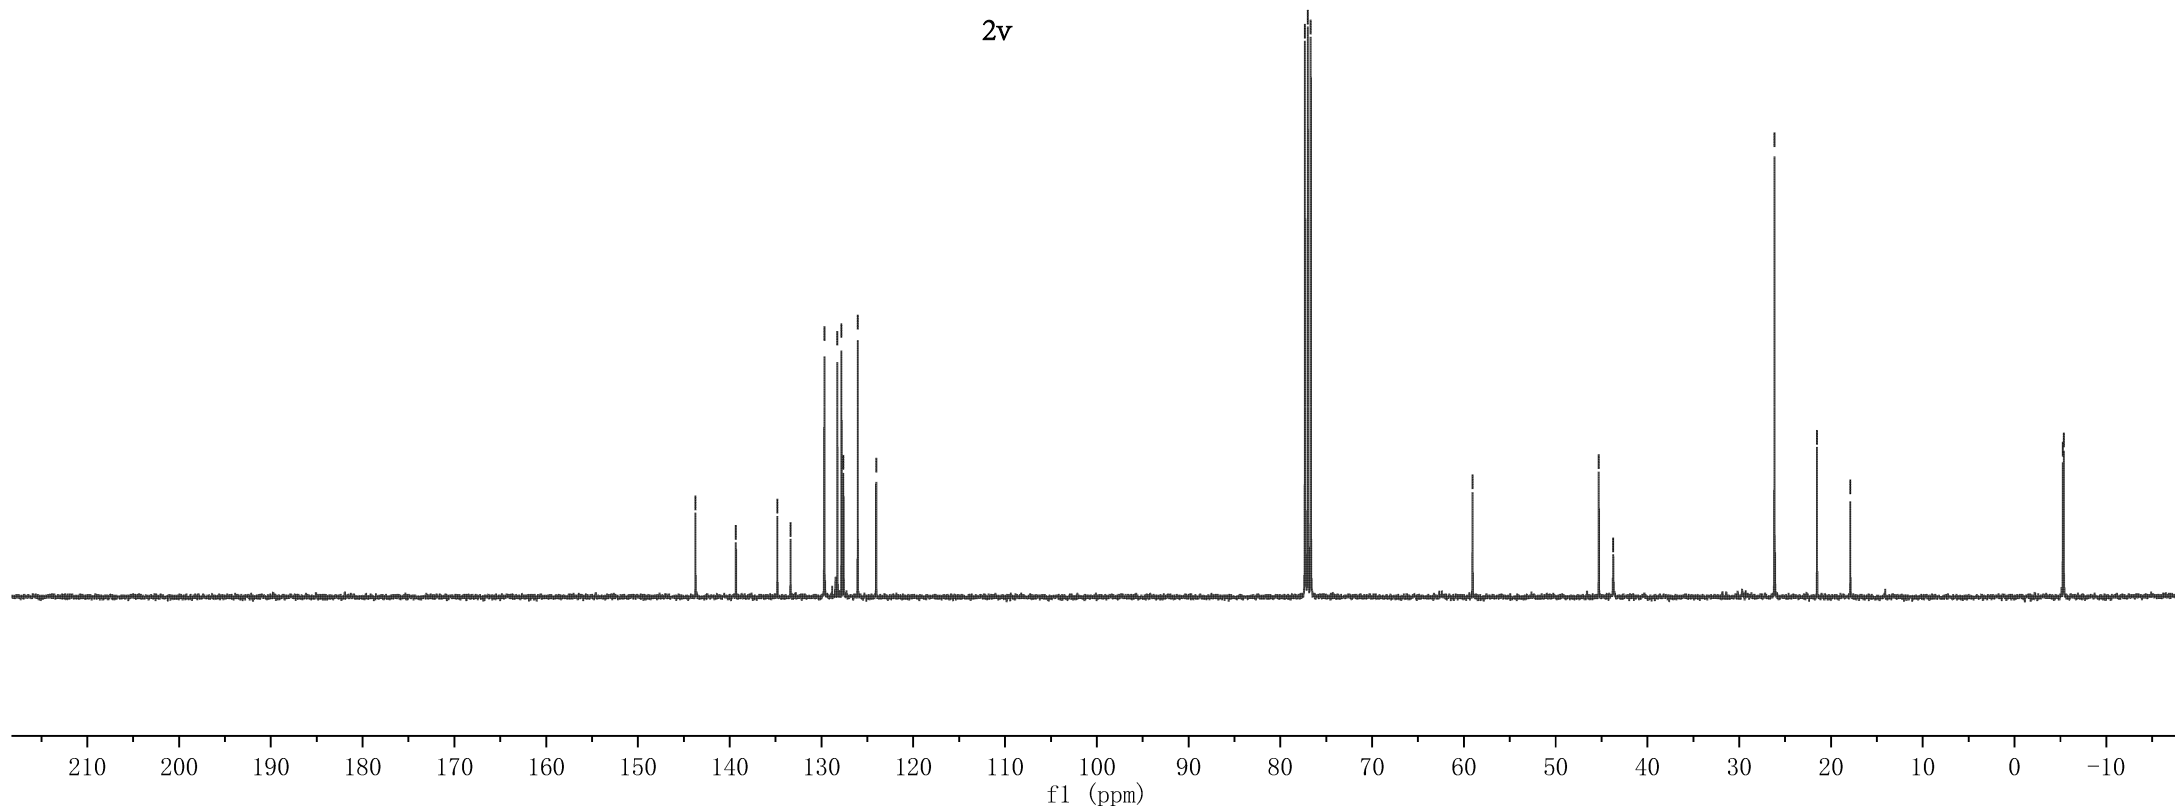

| Parameter                | Value               |
|--------------------------|---------------------|
| 1 Title                  | qlj-11-54-1-H       |
| 2 Origin                 | Bruker BioSpin GmbH |
| 3 Solvent                | CDC13               |
| 4 Temperature            | 294.7               |
| 5 Number of Scans        | 16                  |
| 6 Acquisition Time       | 3.9977              |
| 7 Acquisition Date       | 2025-07-05T08:29:24 |
| 8 Spectrometer Frequency | 400.25              |
| 9 Spectral Width         | 8196.7              |
| 10 Lowest Frequency      | -1636.3             |
| 11 Nucleus               | <sup>1</sup> H      |
| 12 Acquired Size         | 32768               |
| 13 Spectral Size         | 65536               |

7.753 7.732 7.444 7.366 7.315 7.280 6.984 6.966 6.648 6.630 6.574 6.079 6.073 6.068 6.062 5.724 5.087 4.287 4.284 4.258 4.254 4.169 4.137 4.126 4.033 3.876 3.862 3.849 3.833 3.304 3.260 2.512 2.506 2.483 2.477 2.443 2.288 2.135 1.746 1.739 1.719 1.700 1.666 1.236

2.07 2.06 2.11 2.12 1.15 1.14 1.13 0.97 0.94 2.10 1.16 1.18 1.04 2.04 2.92 1.03 1.03 3.00 3.11 3.11 4.06 6.10

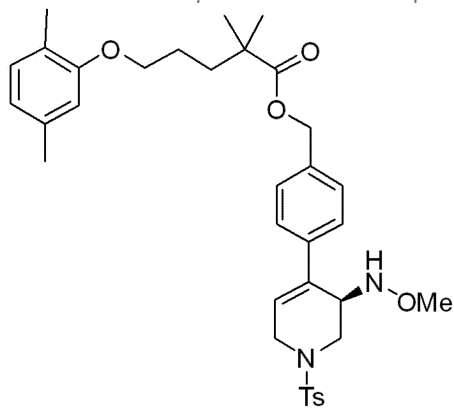

4a

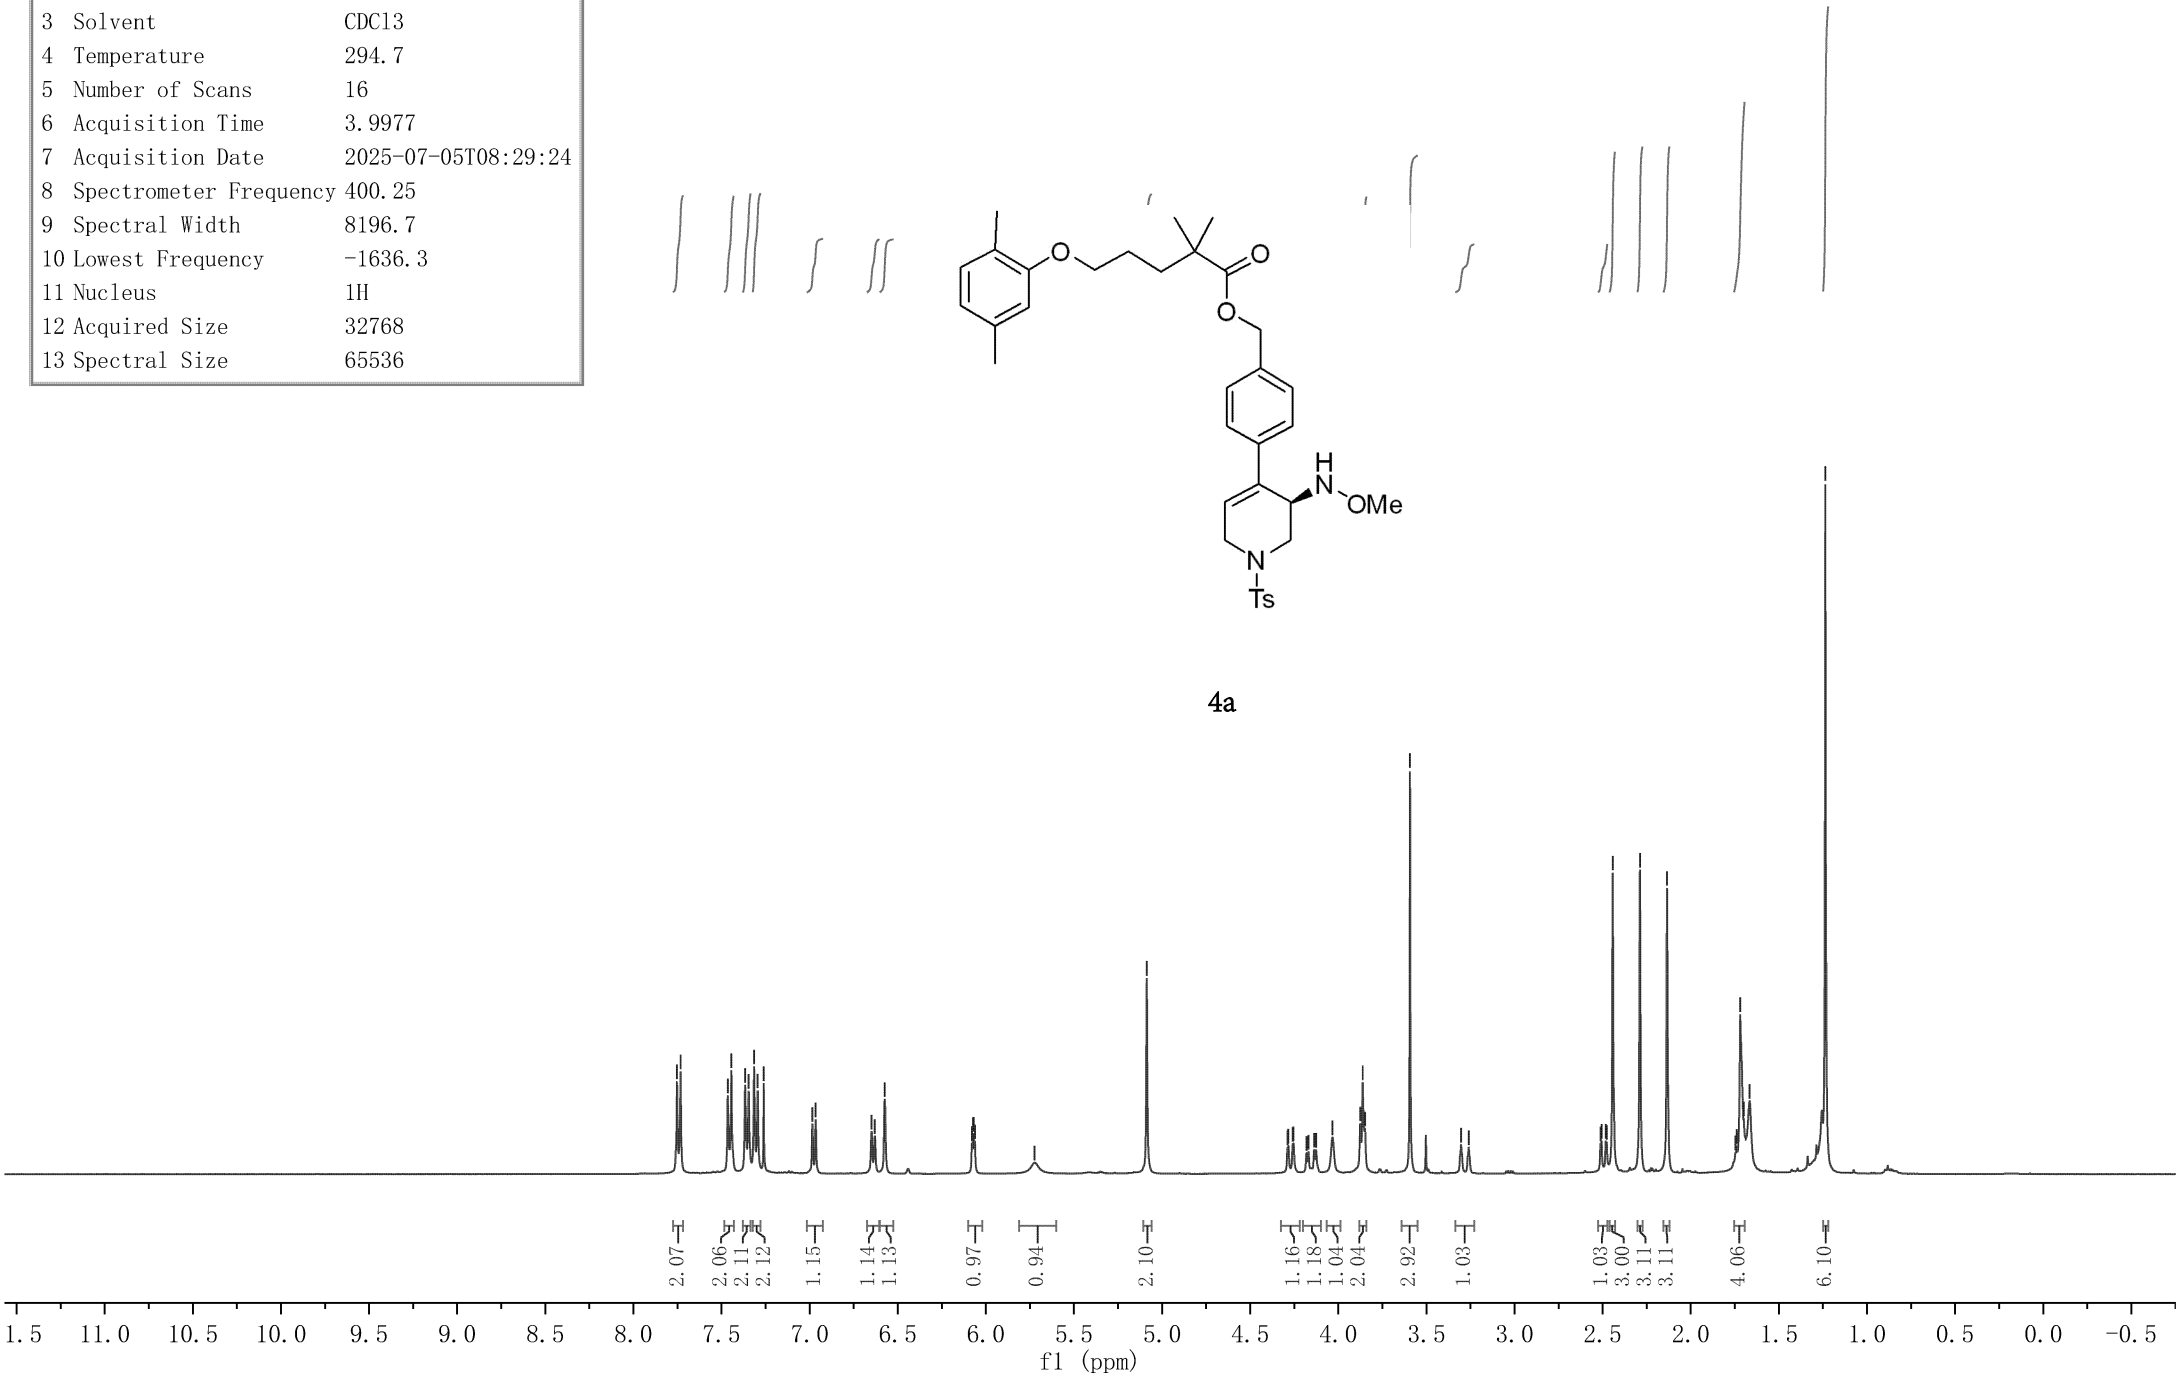

| Parameter                | Value               |
|--------------------------|---------------------|
| 1 Title                  | qlj-11-54-1-C       |
| 2 Origin                 | Bruker BioSpin GmbH |
| 3 Solvent                | CDC13               |
| 4 Temperature            | 295.8               |
| 5 Number of Scans        | 1024                |
| 6 Acquisition Time       | 1.3763              |
| 7 Acquisition Date       | 2025-07-05T09:28:33 |
| 8 Spectrometer Frequency | 100.64              |
| 9 Spectral Width         | 23809.5             |
| 10 Lowest Frequency      | -1840.5             |
| 11 Nucleus               | <sup>13</sup> C     |
| 12 Acquired Size         | 32768               |
| 13 Spectral Size         | 32768               |

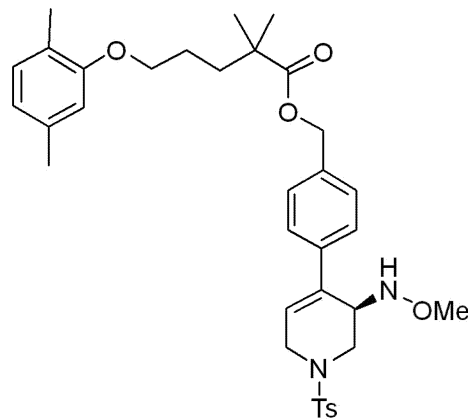

4a

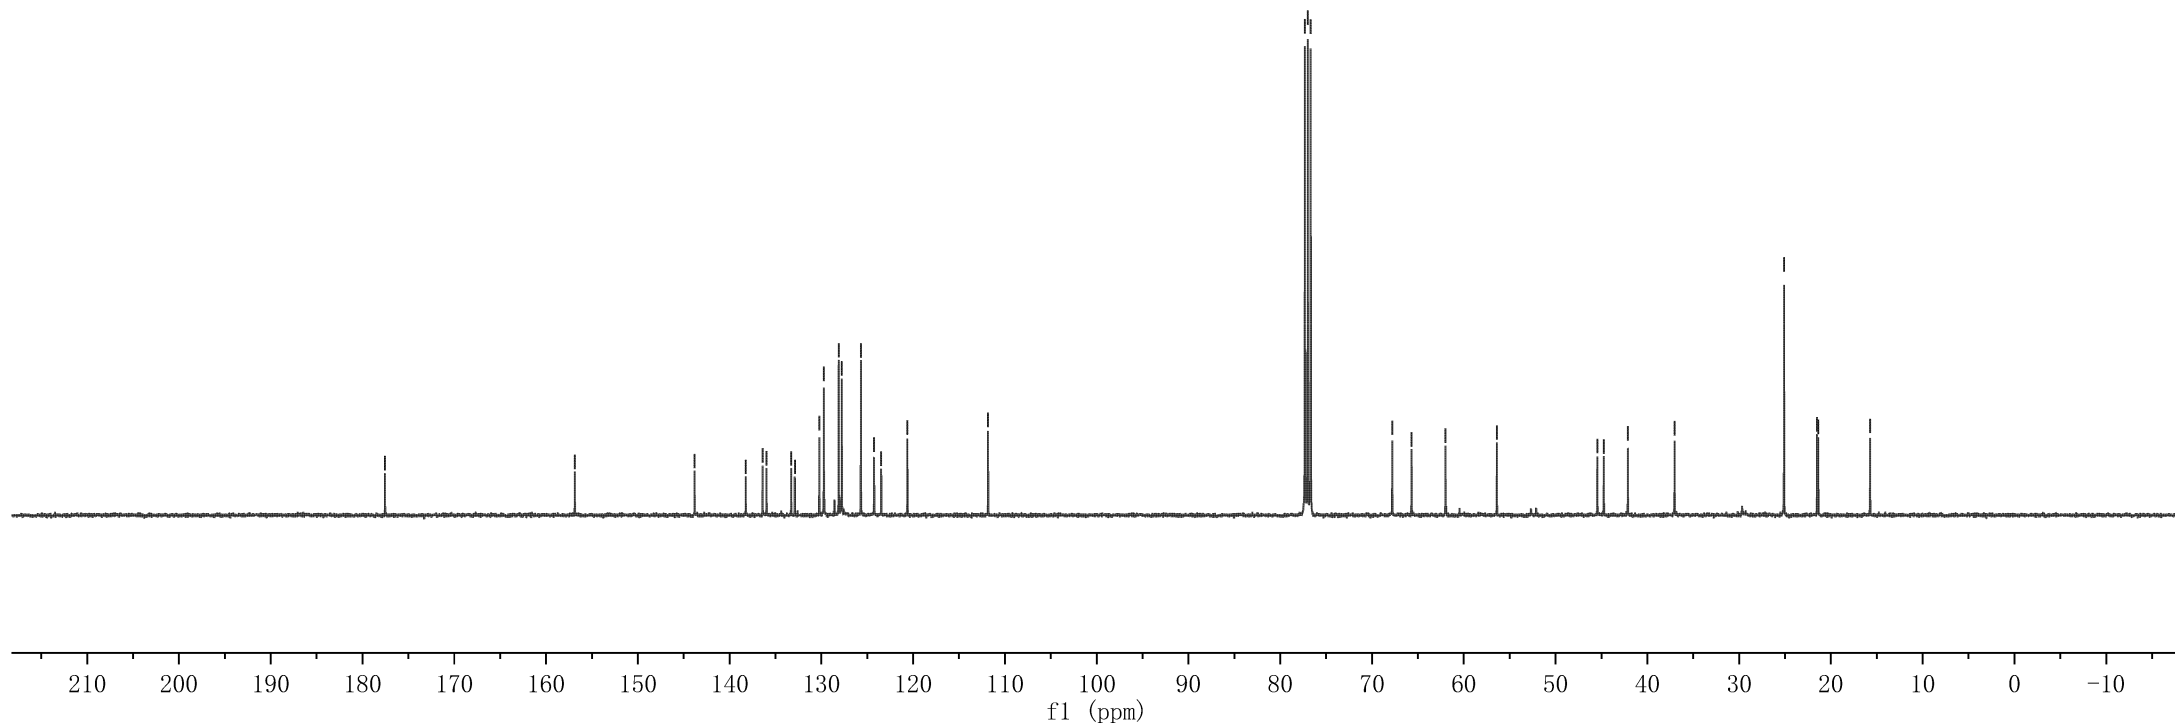

| Parameter                | Value               |
|--------------------------|---------------------|
| 1 Title                  | qlj-11-59-1-H       |
| 2 Origin                 | Bruker BioSpin GmbH |
| 3 Solvent                | CDC13               |
| 4 Temperature            | 296.9               |
| 5 Number of Scans        | 16                  |
| 6 Acquisition Time       | 4.0894              |
| 7 Acquisition Date       | 2025-07-09T18:48:00 |
| 8 Spectrometer Frequency | 400.13              |
| 9 Spectral Width         | 8012.8              |
| 10 Lowest Frequency      | -1608.9             |
| 11 Nucleus               | 1H                  |
| 12 Acquired Size         | 32768               |
| 13 Spectral Size         | 65536               |

7.746  
7.725  
7.476  
7.455  
7.368  
7.362  
7.301  
7.289  
6.733  
6.711  
6.115  
6.109  
6.104  
6.098  
5.717  
5.202  
4.704  
4.293  
4.289  
4.263  
4.260  
4.179  
4.146  
4.135  
4.044  
3.589  
3.324  
3.280  
2.534  
2.528  
2.504  
2.499  
2.435

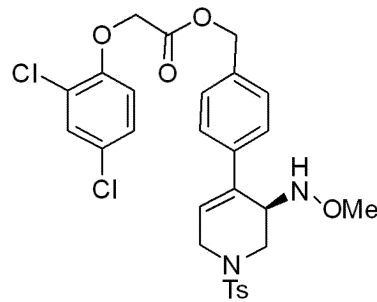

4b

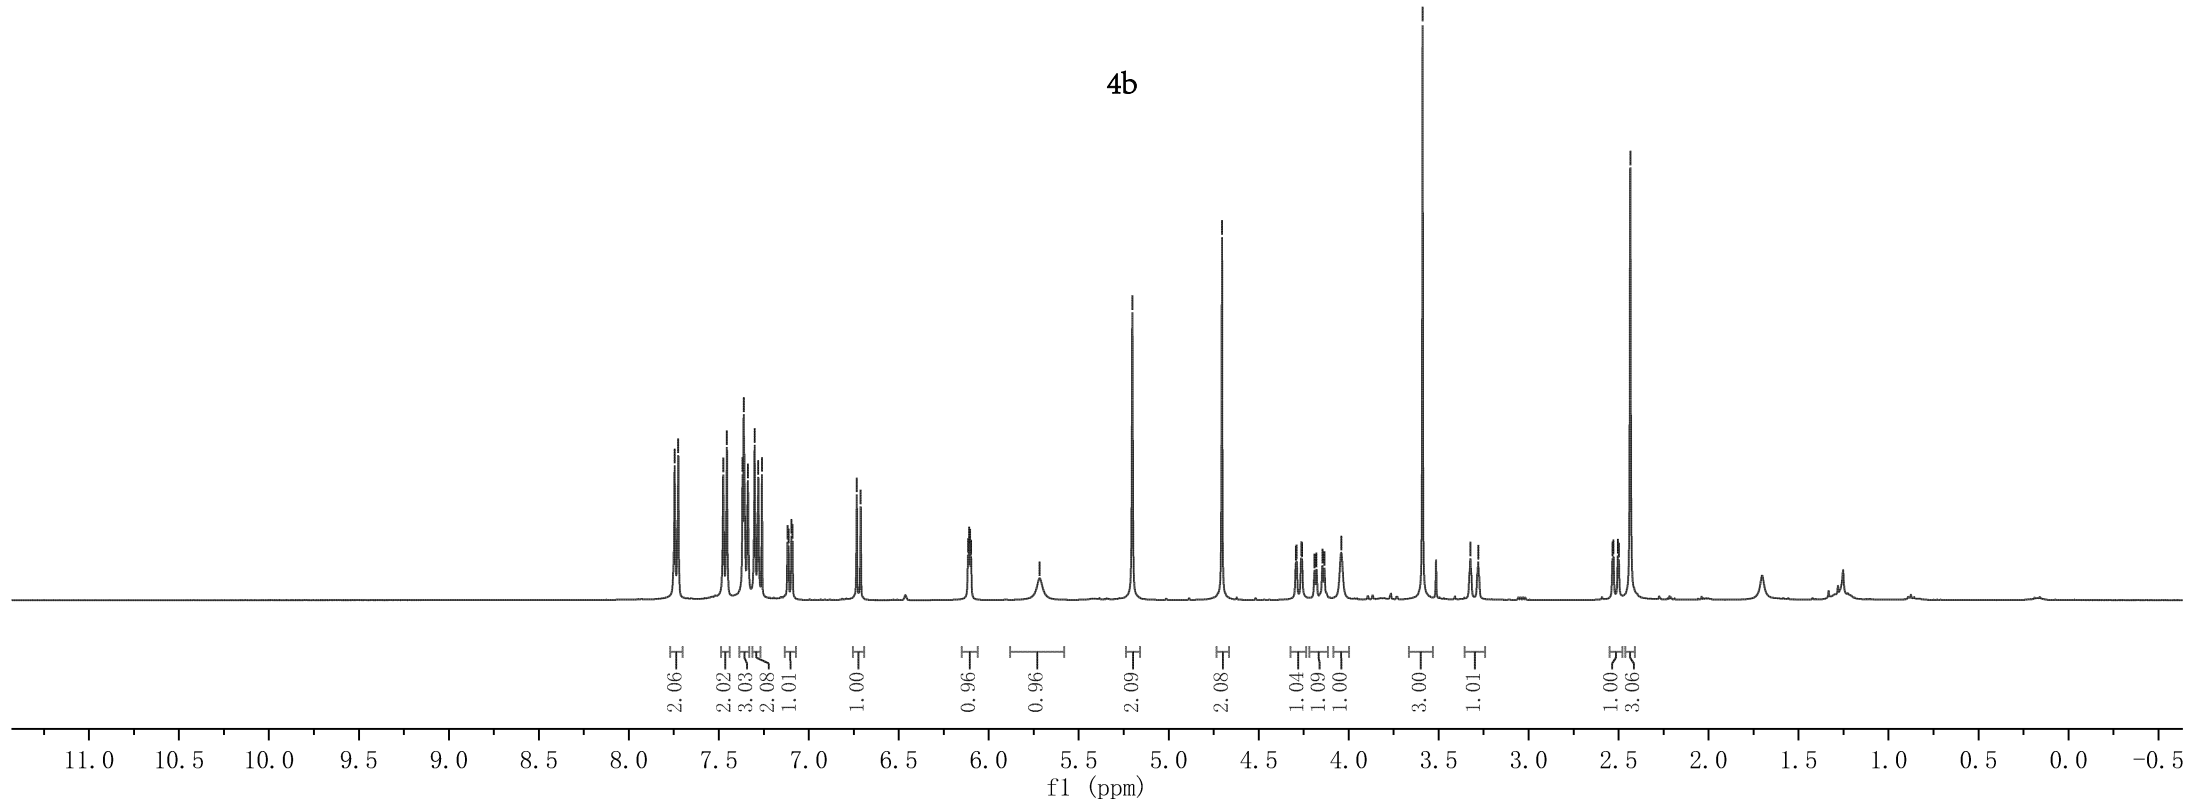

— 167.87 — 152.25 — 143.83 — 138.90 — 134.49 — 133.26 — 132.87 — 130.26 — 129.73 — 128.74 — 127.74 — 127.48 — 125.84 — 124.61 — 124.72 — 77.32 — 77.00 — 76.68 — 66.70 — 66.34 — 61.95 — 56.38 — 45.44 — 44.73 — 21.49

| Parameter                | Value               |
|--------------------------|---------------------|
| 1 Title                  | qlj-11-59-1-C       |
| 2 Origin                 | Bruker BioSpin GmbH |
| 3 Solvent                | CDC13               |
| 4 Temperature            | 297.4               |
| 5 Number of Scans        | 250                 |
| 6 Acquisition Time       | 1.3631              |
| 7 Acquisition Date       | 2025-07-09T18:51:00 |
| 8 Spectrometer Frequency | 100.61              |
| 9 Spectral Width         | 24038.5             |
| 10 Lowest Frequency      | -1966.4             |
| 11 Nucleus               | 13C                 |
| 12 Acquired Size         | 32768               |
| 13 Spectral Size         | 32768               |

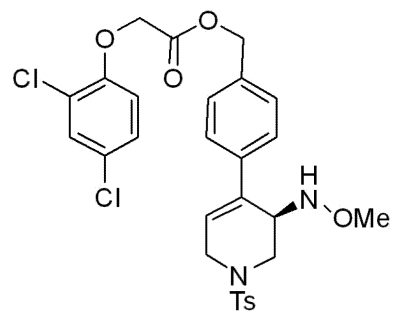

4b

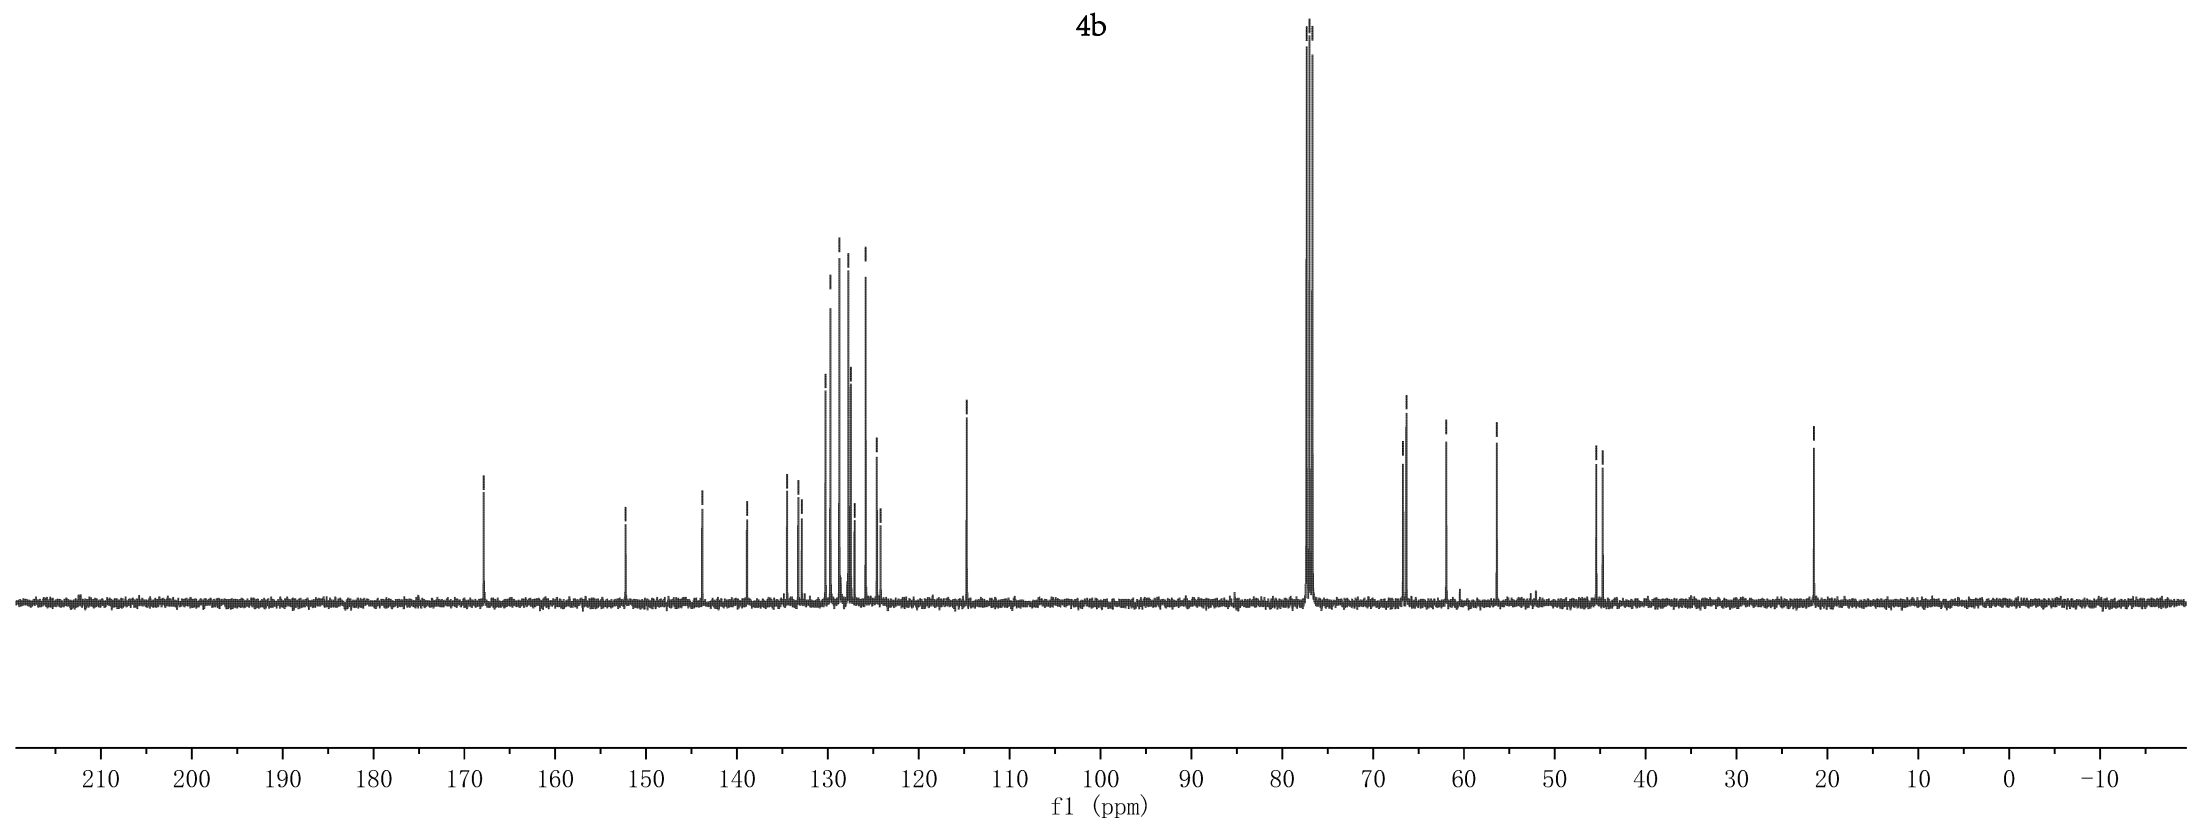

| Parameter                | Value               |
|--------------------------|---------------------|
| 1 Title                  | qlj-11-59-3-H       |
| 2 Origin                 | Bruker BioSpin GmbH |
| 3 Solvent                | CDC13               |
| 4 Temperature            | 295.4               |
| 5 Number of Scans        | 16                  |
| 6 Acquisition Time       | 3.9977              |
| 7 Acquisition Date       | 2025-07-10T14:09:41 |
| 8 Spectrometer Frequency | 400.25              |
| 9 Spectral Width         | 8196.7              |
| 10 Lowest Frequency      | -1636.3             |
| 11 Nucleus               | 1H                  |
| 12 Acquired Size         | 32768               |
| 13 Spectral Size         | 65536               |

8.115 8.109 7.883 7.881 7.864 7.862 7.746 7.726 7.573 7.570 7.554 7.551 7.535 7.533 7.479 7.476 7.467 7.461 7.446 7.446 7.423 7.417 7.402 7.396 7.364 7.357 7.347 7.337 7.307 7.286 7.260 7.025 7.004 6.096 6.090 6.086 6.079 5.713 5.172 5.116 4.284 4.280 4.254 4.250 4.181 4.170 4.138 4.126 4.040 3.675 3.586 3.315 3.271 2.527 2.521 2.497 2.491 2.434

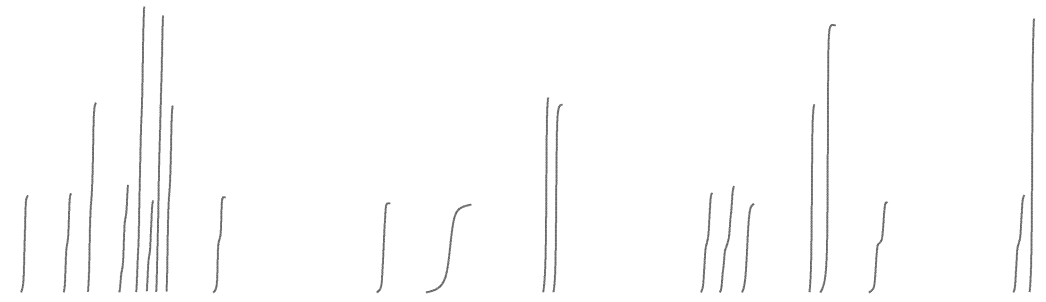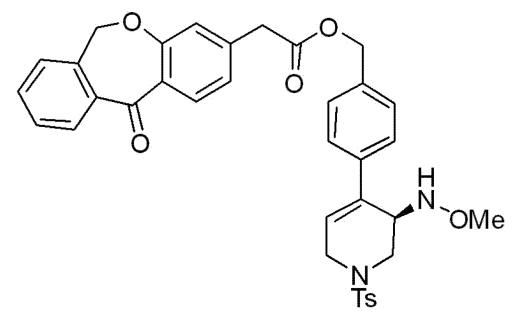

4c

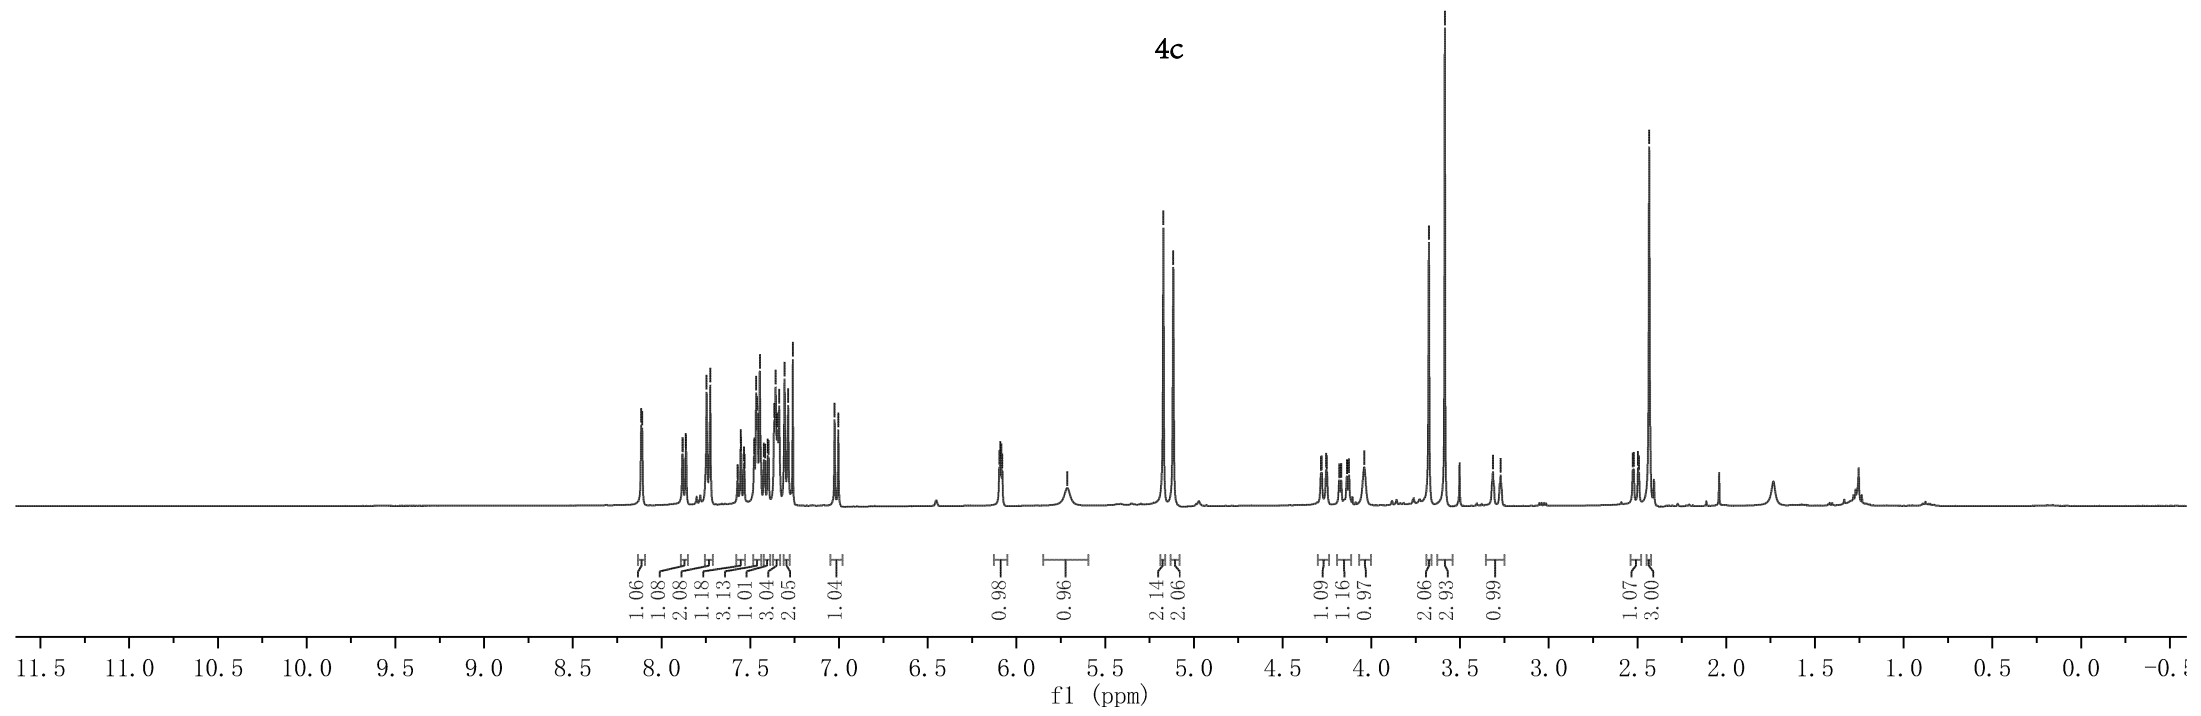

| Parameter                | Value               |
|--------------------------|---------------------|
| 1 Title                  | qlj-11-59-3-C       |
| 2 Origin                 | Bruker BioSpin GmbH |
| 3 Solvent                | CDC13               |
| 4 Temperature            | 296.2               |
| 5 Number of Scans        | 250                 |
| 6 Acquisition Time       | 1.3763              |
| 7 Acquisition Date       | 2025-07-10T14:24:24 |
| 8 Spectrometer Frequency | 100.64              |
| 9 Spectral Width         | 23809.5             |
| 10 Lowest Frequency      | -1849.2             |
| 11 Nucleus               | 13C                 |
| 12 Acquired Size         | 32768               |
| 13 Spectral Size         | 32768               |

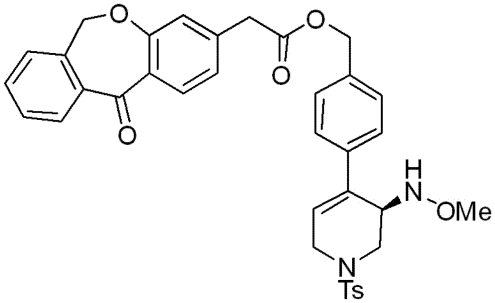

4c

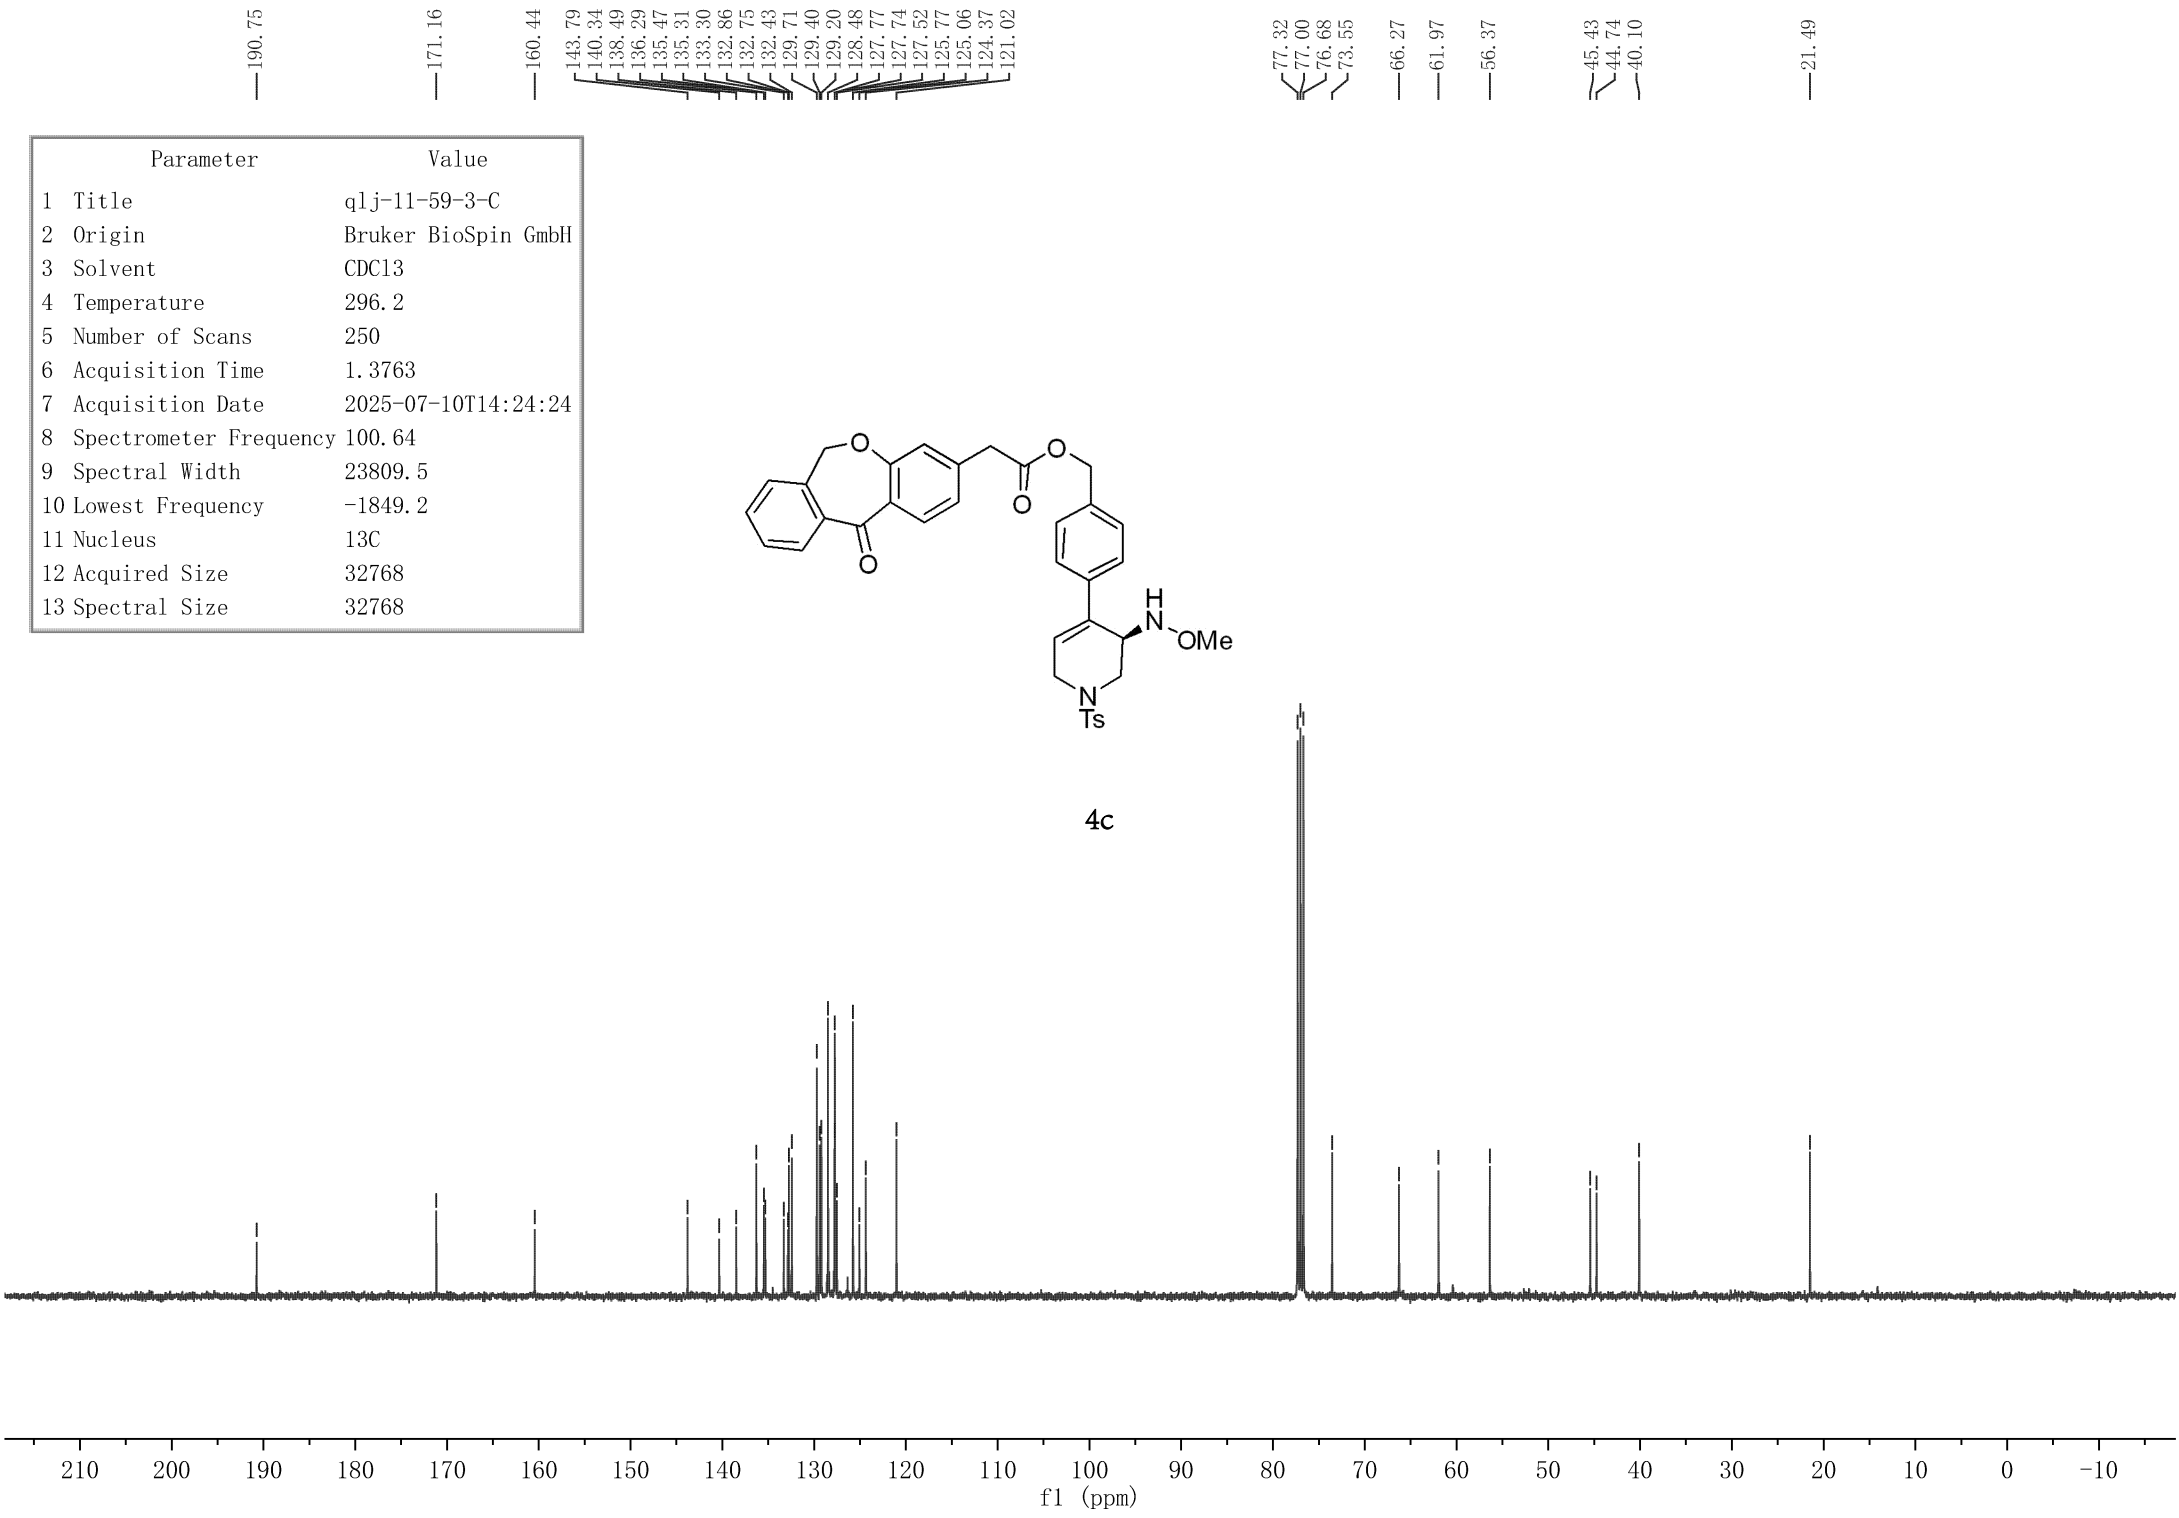

| Parameter                | Value               |
|--------------------------|---------------------|
| 1 Title                  | qlj-11-59-4-H       |
| 2 Origin                 | Bruker BioSpin GmbH |
| 3 Solvent                | CDC13               |
| 4 Temperature            | 295.5               |
| 5 Number of Scans        | 16                  |
| 6 Acquisition Time       | 3.9977              |
| 7 Acquisition Date       | 2025-07-09T19:29:27 |
| 8 Spectrometer Frequency | 400.25              |
| 9 Spectral Width         | 8196.7              |
| 10 Lowest Frequency      | -1636.5             |
| 11 Nucleus               | <sup>1</sup> H      |
| 12 Acquired Size         | 32768               |
| 13 Spectral Size         | 65536               |

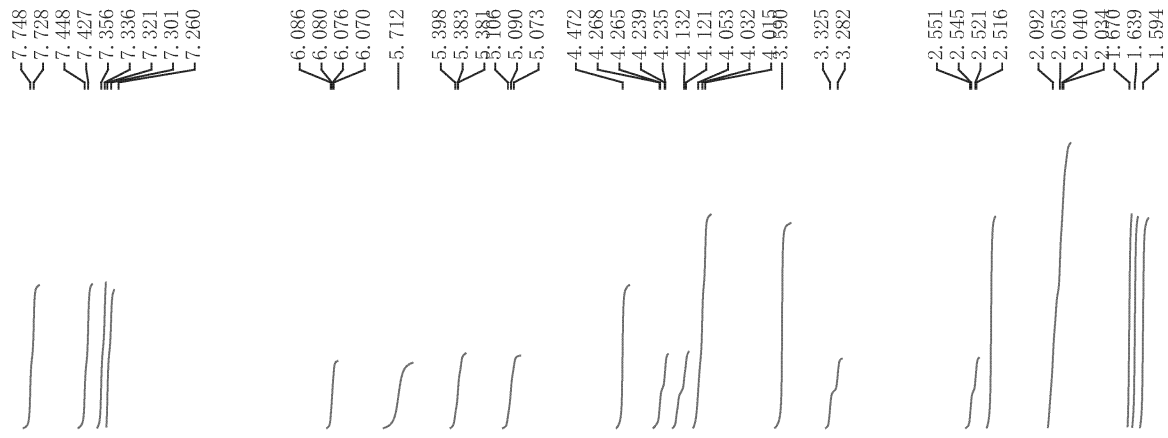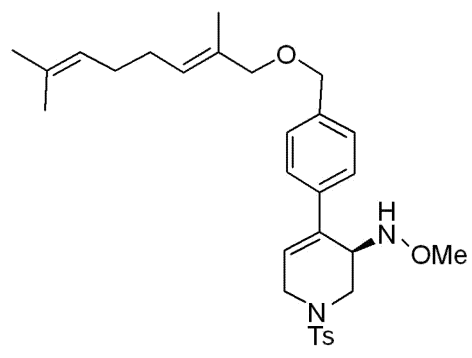

4d

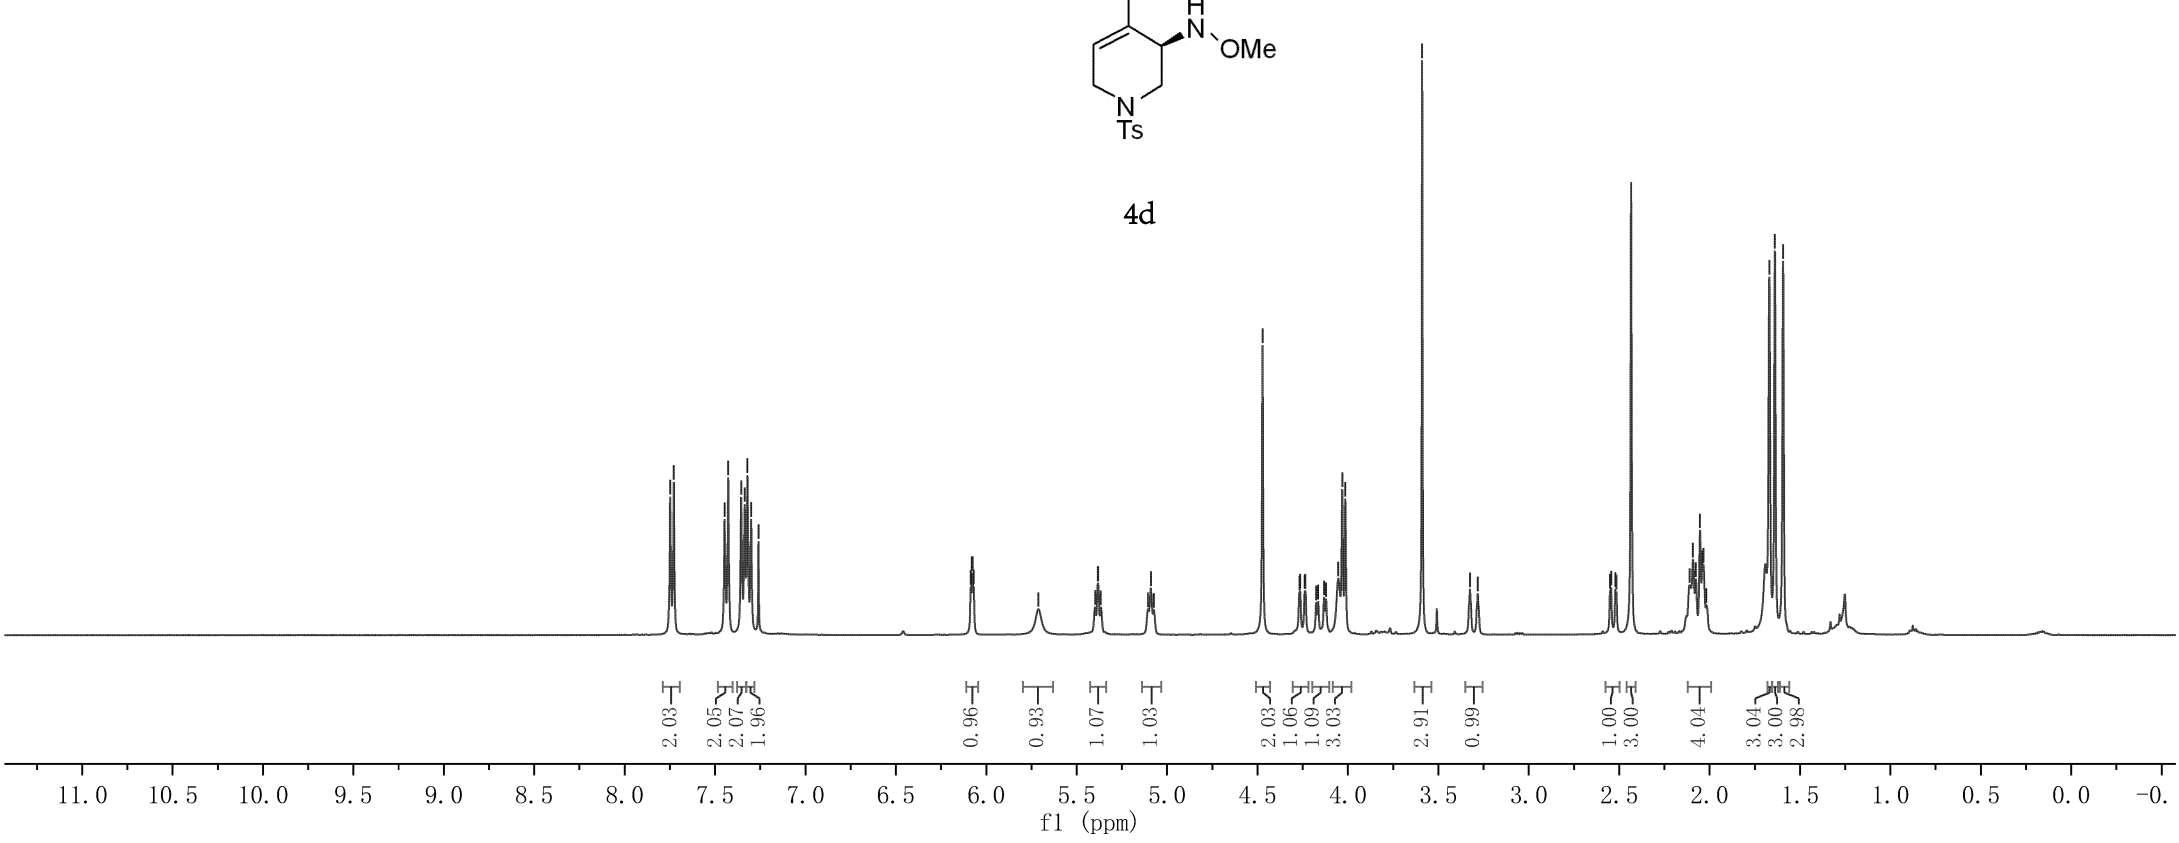

| Parameter                | Value               |
|--------------------------|---------------------|
| 1 Title                  | qlj-11-59-4-C       |
| 2 Origin                 | Bruker BioSpin GmbH |
| 3 Solvent                | CDC13               |
| 4 Temperature            | 296.2               |
| 5 Number of Scans        | 312                 |
| 6 Acquisition Time       | 1.3763              |
| 7 Acquisition Date       | 2025-07-09T19:47:41 |
| 8 Spectrometer Frequency | 100.64              |
| 9 Spectral Width         | 23809.5             |
| 10 Lowest Frequency      | -1846.8             |
| 11 Nucleus               | <sup>13</sup> C     |
| 12 Acquired Size         | 32768               |
| 13 Spectral Size         | 32768               |

143.77  
140.49  
138.37  
137.70  
133.54  
132.92  
131.63  
129.71  
128.07  
127.77  
125.60  
123.92  
123.87  
120.65

77.32  
77.00  
76.68  
71.47  
66.66  
62.03  
56.45

45.45  
44.83  
39.55

26.30  
25.66  
21.50  
17.65  
16.47

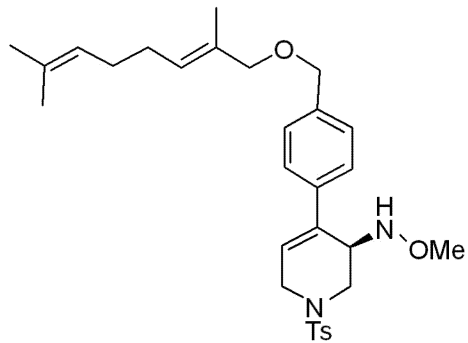

4d

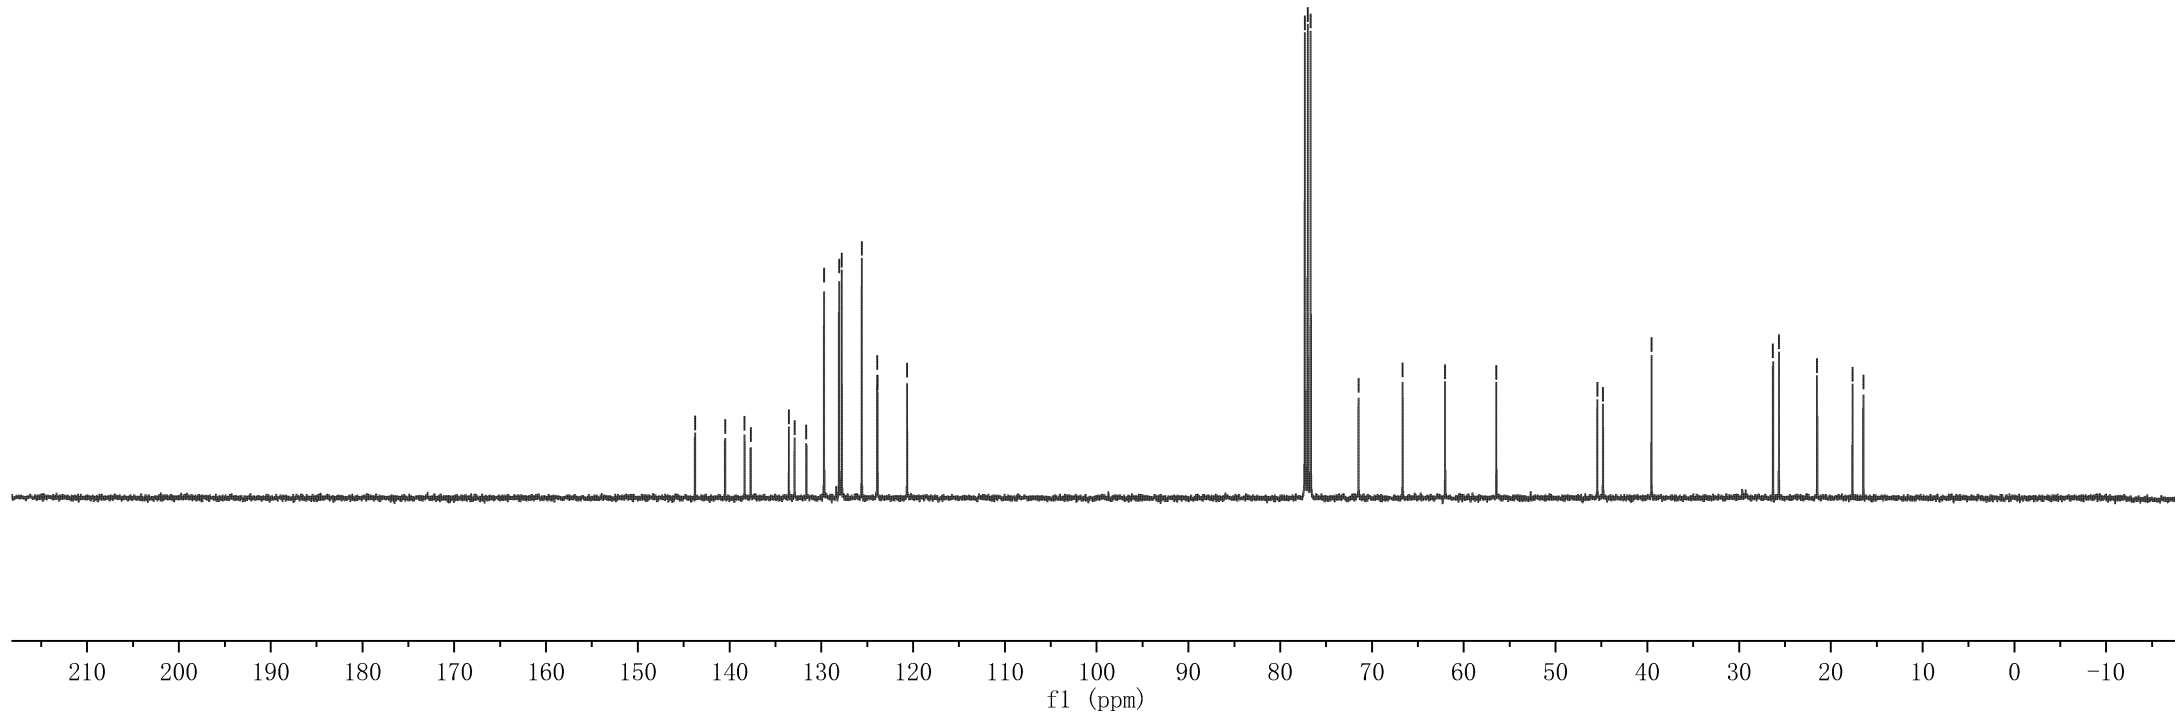

| Parameter                | Value               |
|--------------------------|---------------------|
| 1 Title                  | qlj-11-60-1-H       |
| 2 Origin                 | Bruker BioSpin GmbH |
| 3 Solvent                | CDC13               |
| 4 Temperature            | 294.7               |
| 5 Number of Scans        | 16                  |
| 6 Acquisition Time       | 3.9977              |
| 7 Acquisition Date       | 2025-07-12T16:57:47 |
| 8 Spectrometer Frequency | 400.25              |
| 9 Spectral Width         | 8196.7              |
| 10 Lowest Frequency      | -1636.4             |
| 11 Nucleus               | <sup>1</sup> H      |
| 12 Acquired Size         | 32768               |
| 13 Spectral Size         | 65536               |

7.753 7.733 7.422 7.402 7.363 7.343 7.260 7.205 7.201 7.186 7.181 7.095 7.075 6.086 6.080 6.075 6.069 5.718 5.118 5.087 5.074 5.042 4.286 4.260 4.187 4.176 4.144 4.133 4.037 3.769 3.751 3.733 3.596 3.579 3.276 2.531 2.525 2.501 2.496 2.454 2.438 1.859 1.842 1.825 1.808 1.510 1.493 0.903 0.887

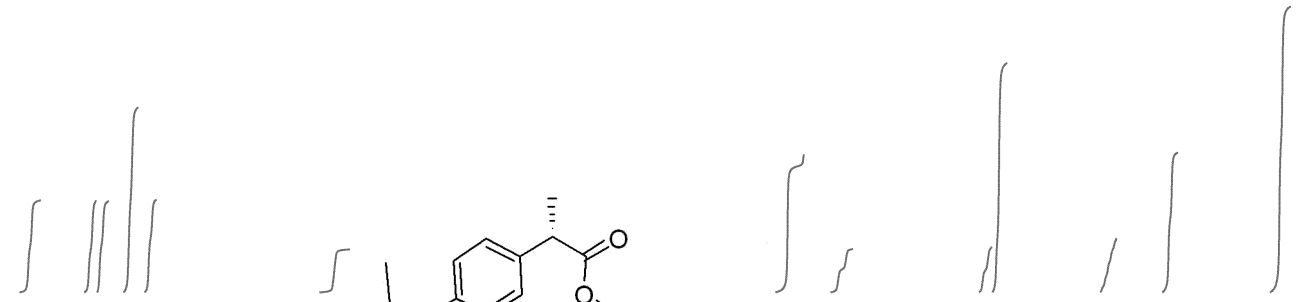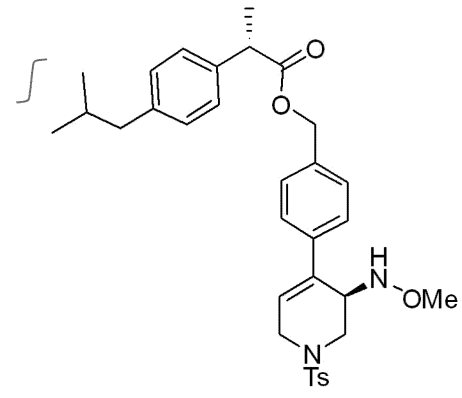

4e

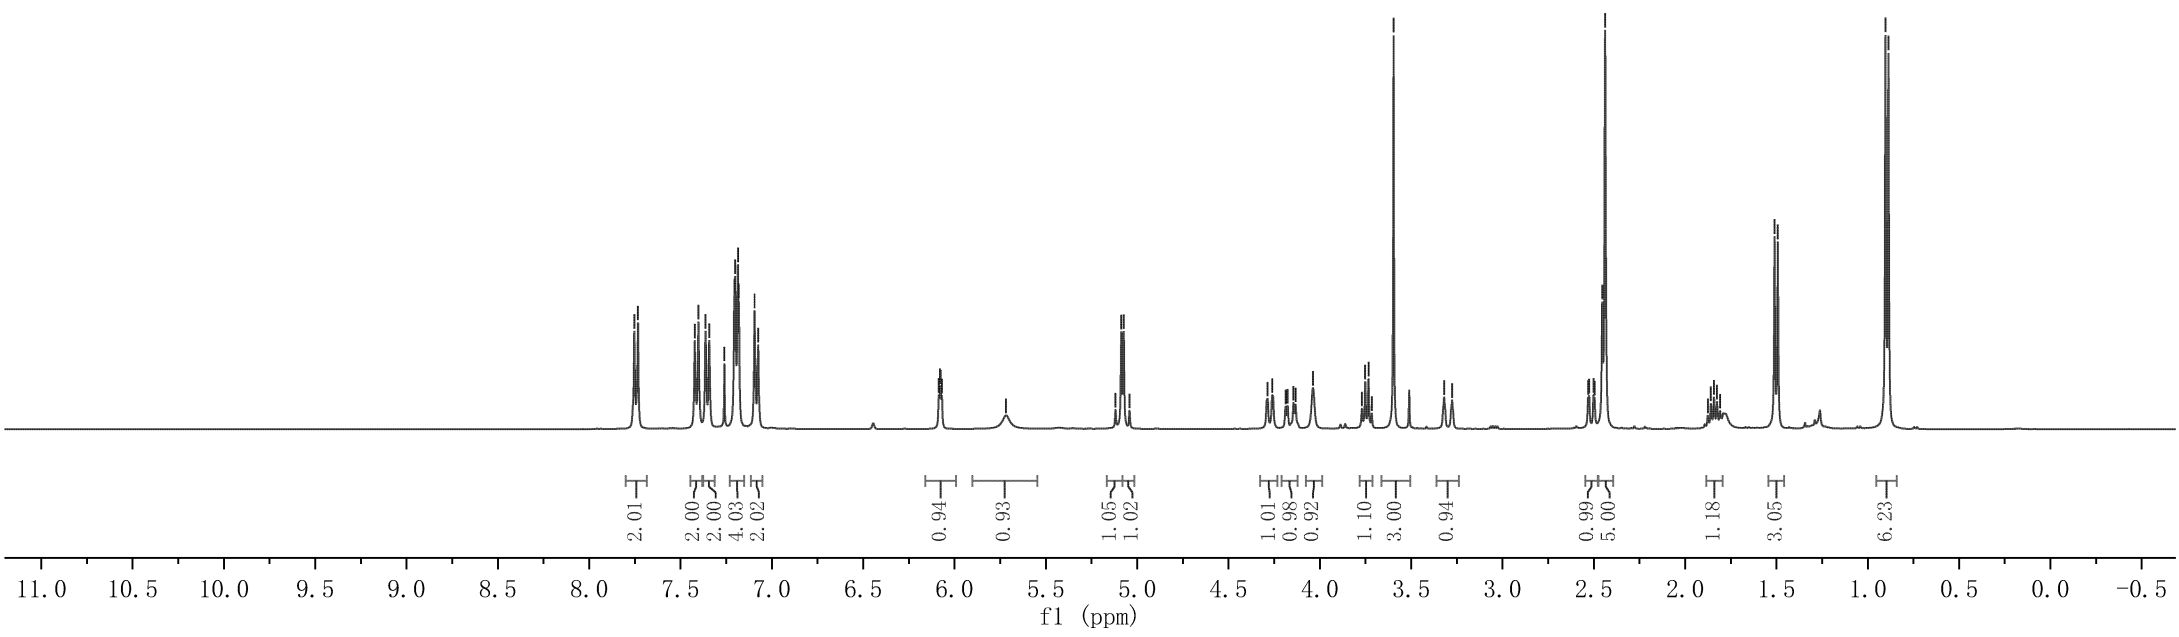

| Parameter                | Value               |
|--------------------------|---------------------|
| 1 Title                  | qlj-11-60-1-C       |
| 2 Origin                 | Bruker BioSpin GmbH |
| 3 Solvent                | CDC13               |
| 4 Temperature            | 295.4               |
| 5 Number of Scans        | 184                 |
| 6 Acquisition Time       | 1.3763              |
| 7 Acquisition Date       | 2025-07-12T17:08:41 |
| 8 Spectrometer Frequency | 100.64              |
| 9 Spectral Width         | 23809.5             |
| 10 Lowest Frequency      | -1851.6             |
| 11 Nucleus               | 13C                 |
| 12 Acquired Size         | 32768               |
| 13 Spectral Size         | 32768               |

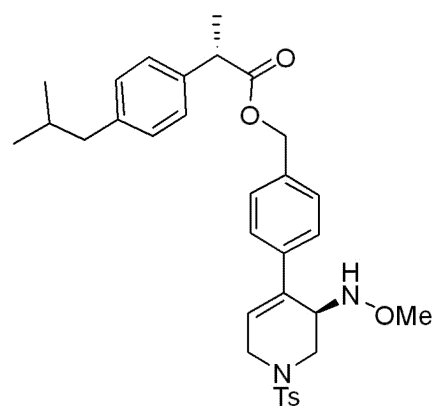

4e

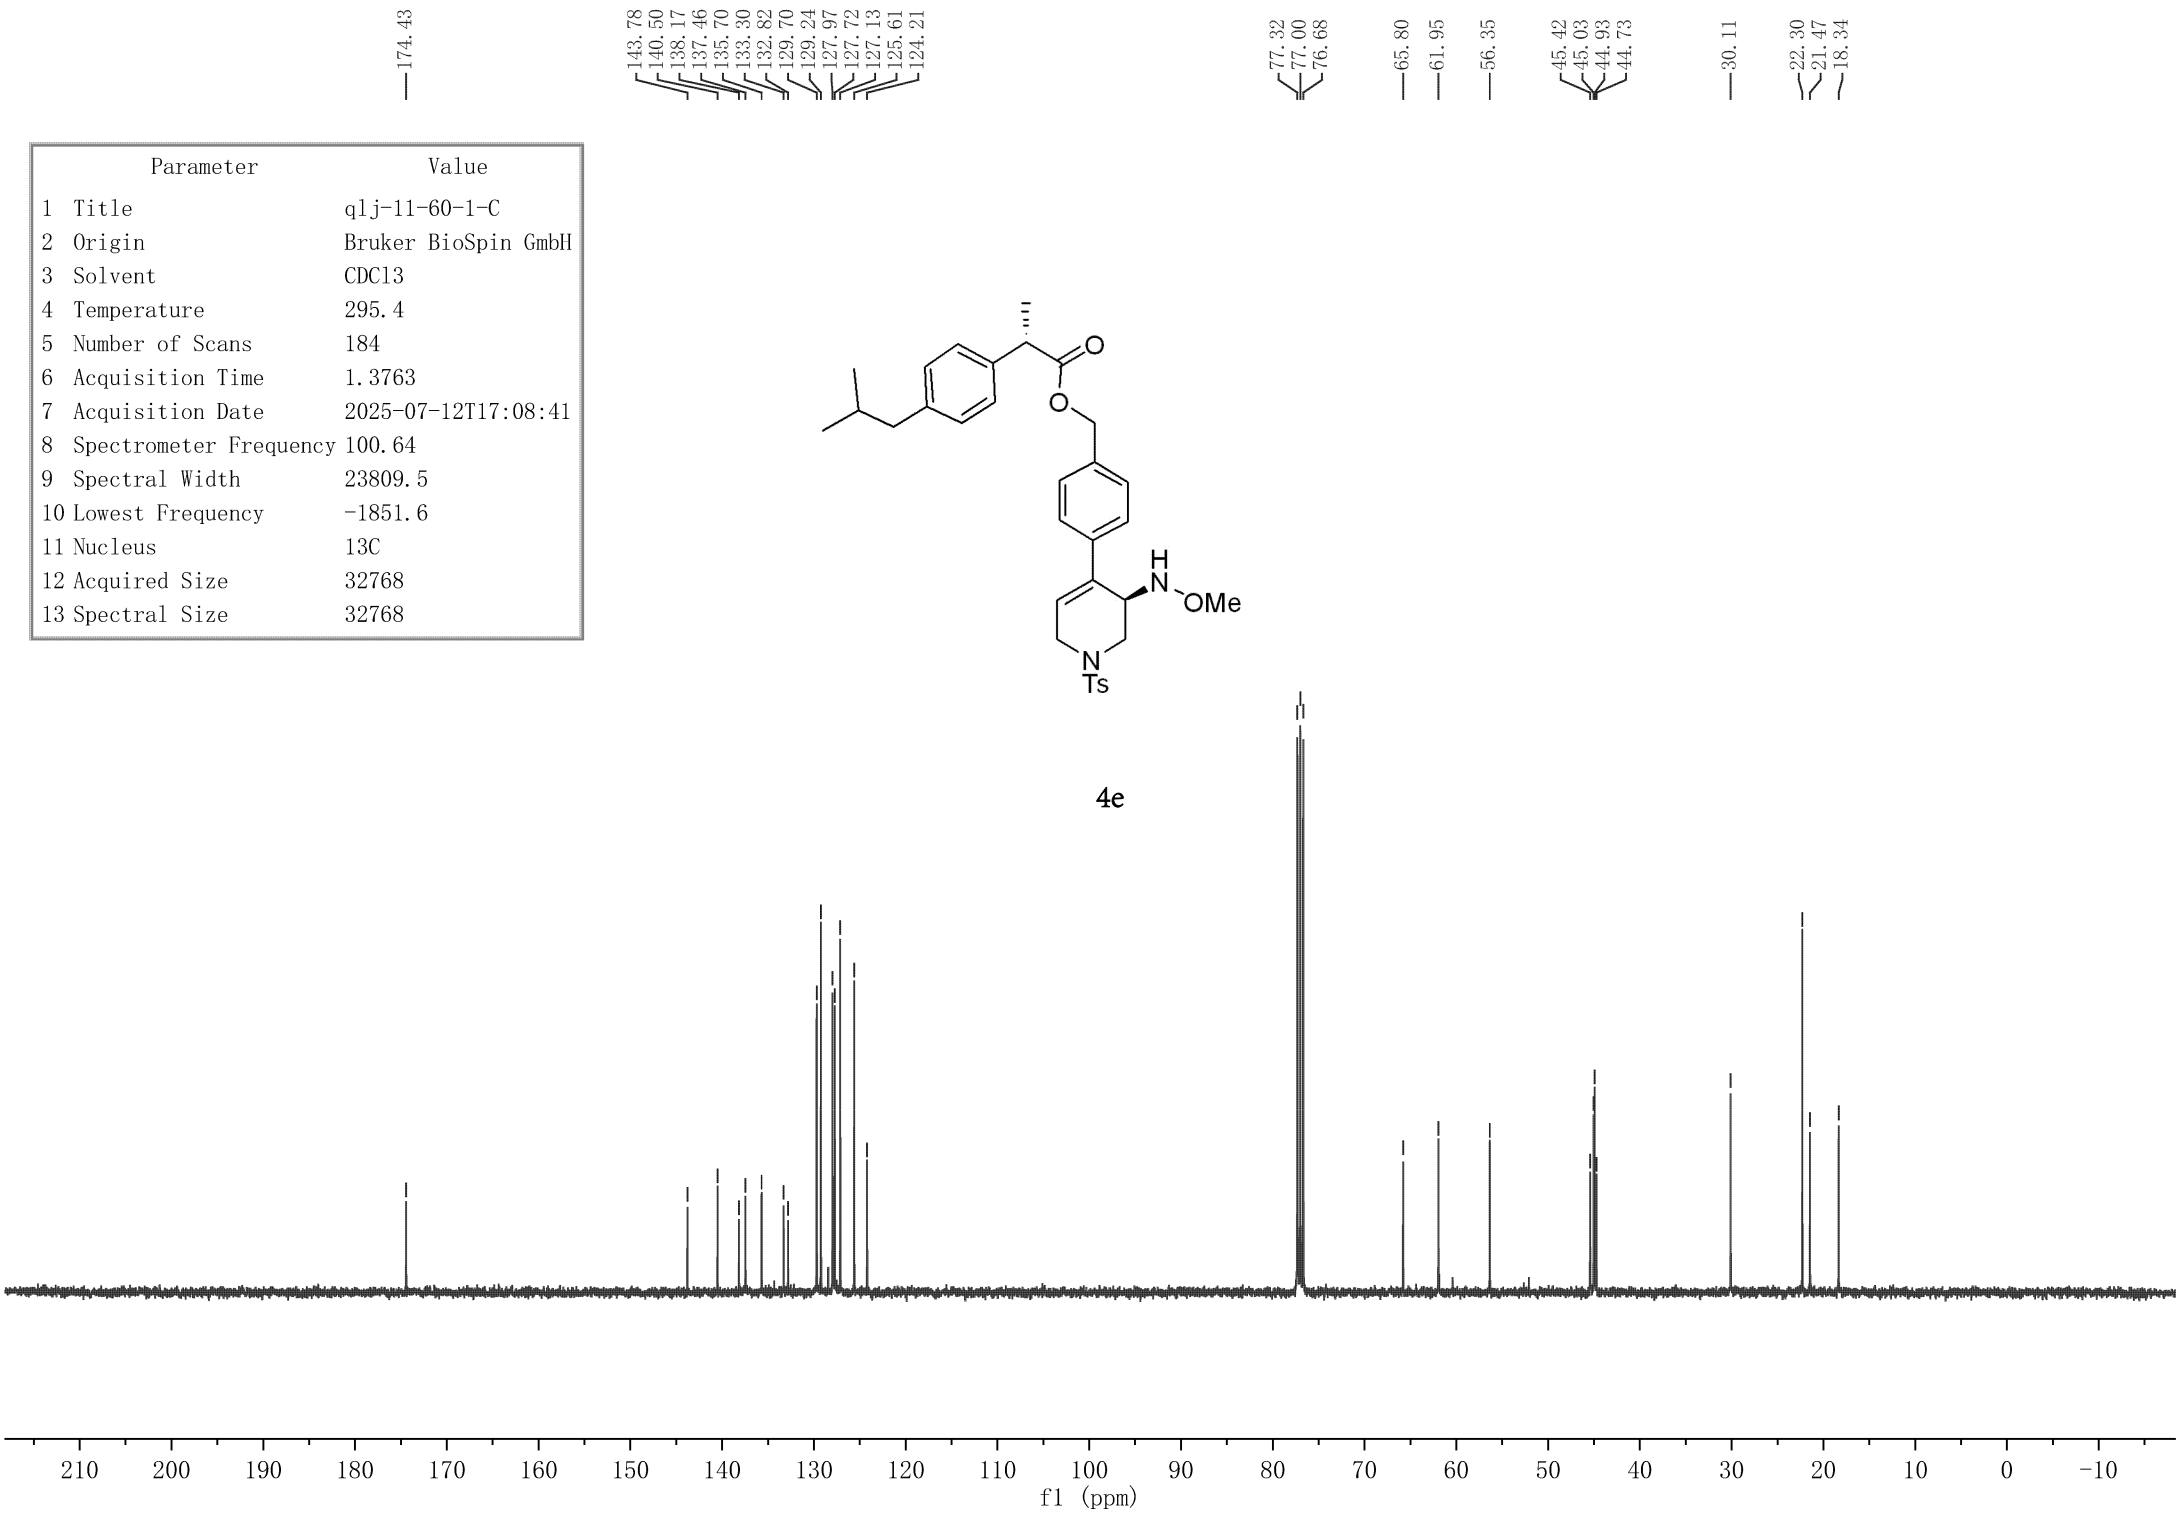

| Parameter                | Value               |
|--------------------------|---------------------|
| 1 Title                  | qlj-11-60-2-H       |
| 2 Origin                 | Bruker BioSpin GmbH |
| 3 Solvent                | CDC13               |
| 4 Temperature            | 294.7               |
| 5 Number of Scans        | 16                  |
| 6 Acquisition Time       | 3.9977              |
| 7 Acquisition Date       | 2025-07-12T17:13:30 |
| 8 Spectrometer Frequency | 400.25              |
| 9 Spectral Width         | 8196.7              |
| 10 Lowest Frequency      | -1704.9             |
| 11 Nucleus               | 1H                  |
| 12 Acquired Size         | 32768               |
| 13 Spectral Size         | 65536               |

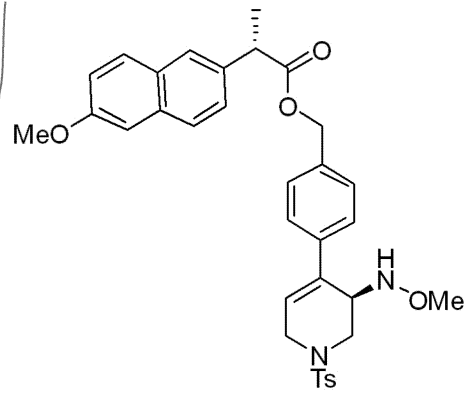

4f

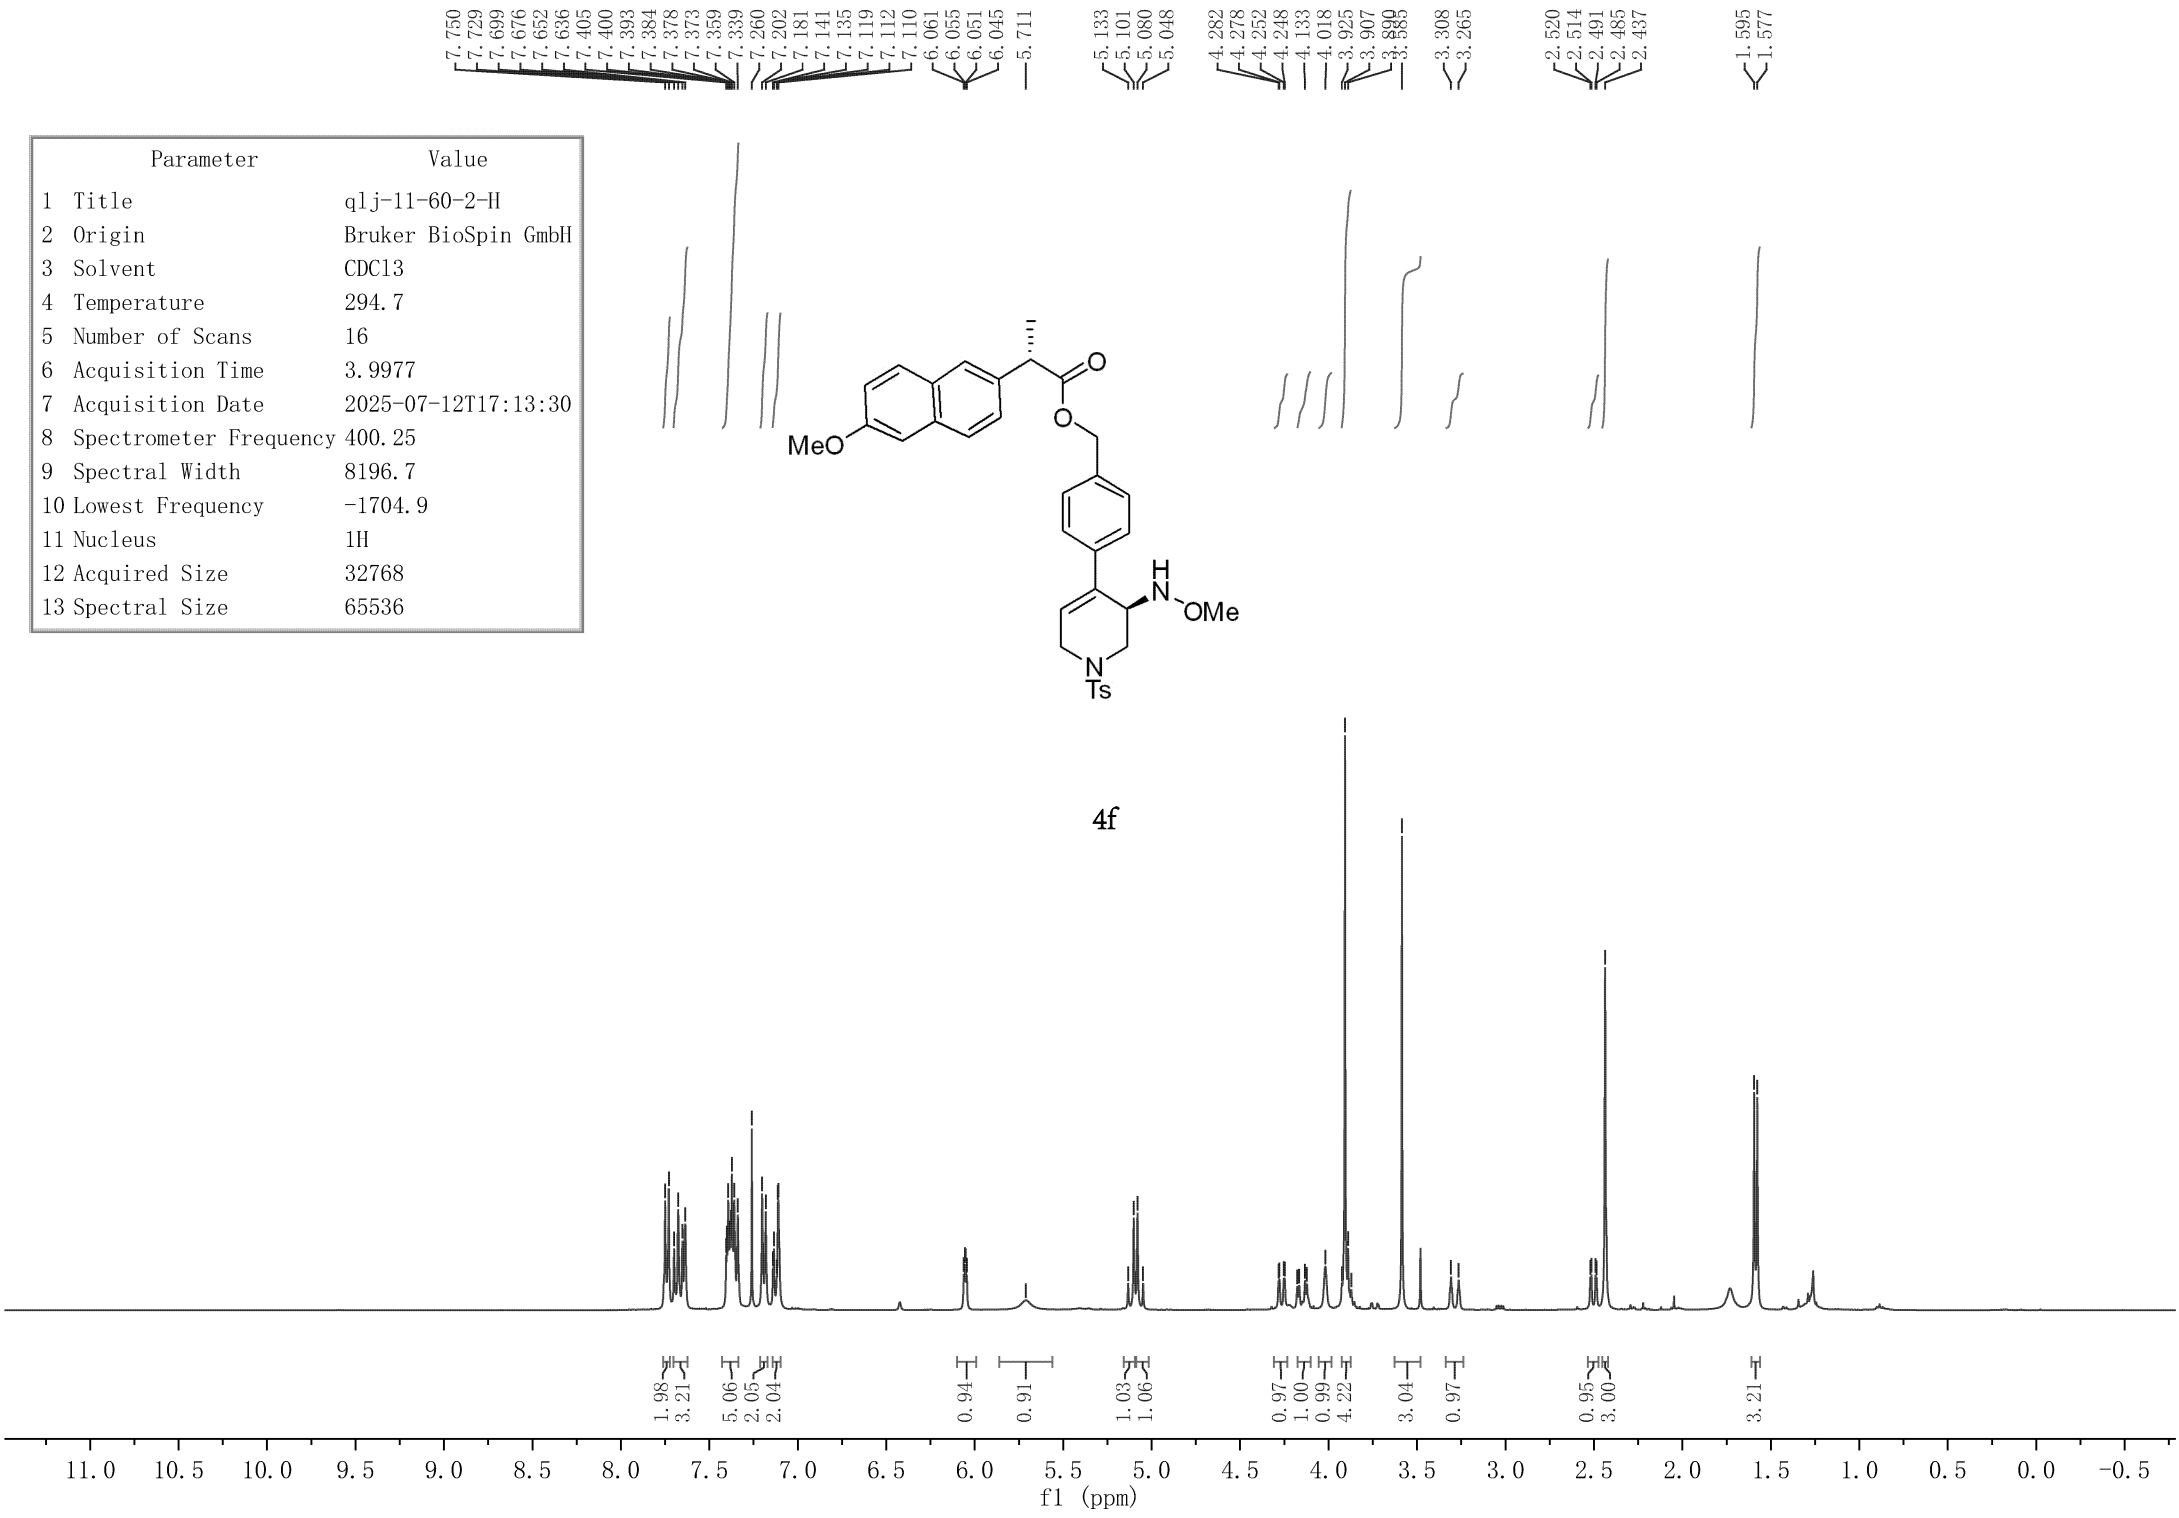

| Parameter                | Value               |
|--------------------------|---------------------|
| 1 Title                  | qlj-11-60-2-C       |
| 2 Origin                 | Bruker BioSpin GmbH |
| 3 Solvent                | CDC13               |
| 4 Temperature            | 295.5               |
| 5 Number of Scans        | 224                 |
| 6 Acquisition Time       | 1.3763              |
| 7 Acquisition Date       | 2025-07-12T17:26:42 |
| 8 Spectrometer Frequency | 100.64              |
| 9 Spectral Width         | 23809.5             |
| 10 Lowest Frequency      | -1849.6             |
| 11 Nucleus               | 13C                 |
| 12 Acquired Size         | 32768               |
| 13 Spectral Size         | 32768               |

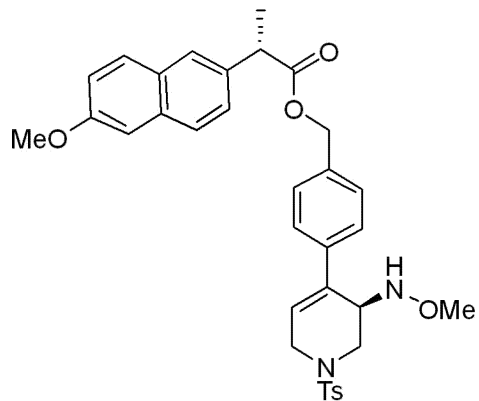

4f

174.38 157.56 143.80 129.71 129.20 128.14 127.74 127.08 126.20 125.92 125.64 124.97 118.97 105.48 77.32 77.00 76.68 65.97 61.97 56.35 55.24 45.42 45.37 44.74 21.48 18.43

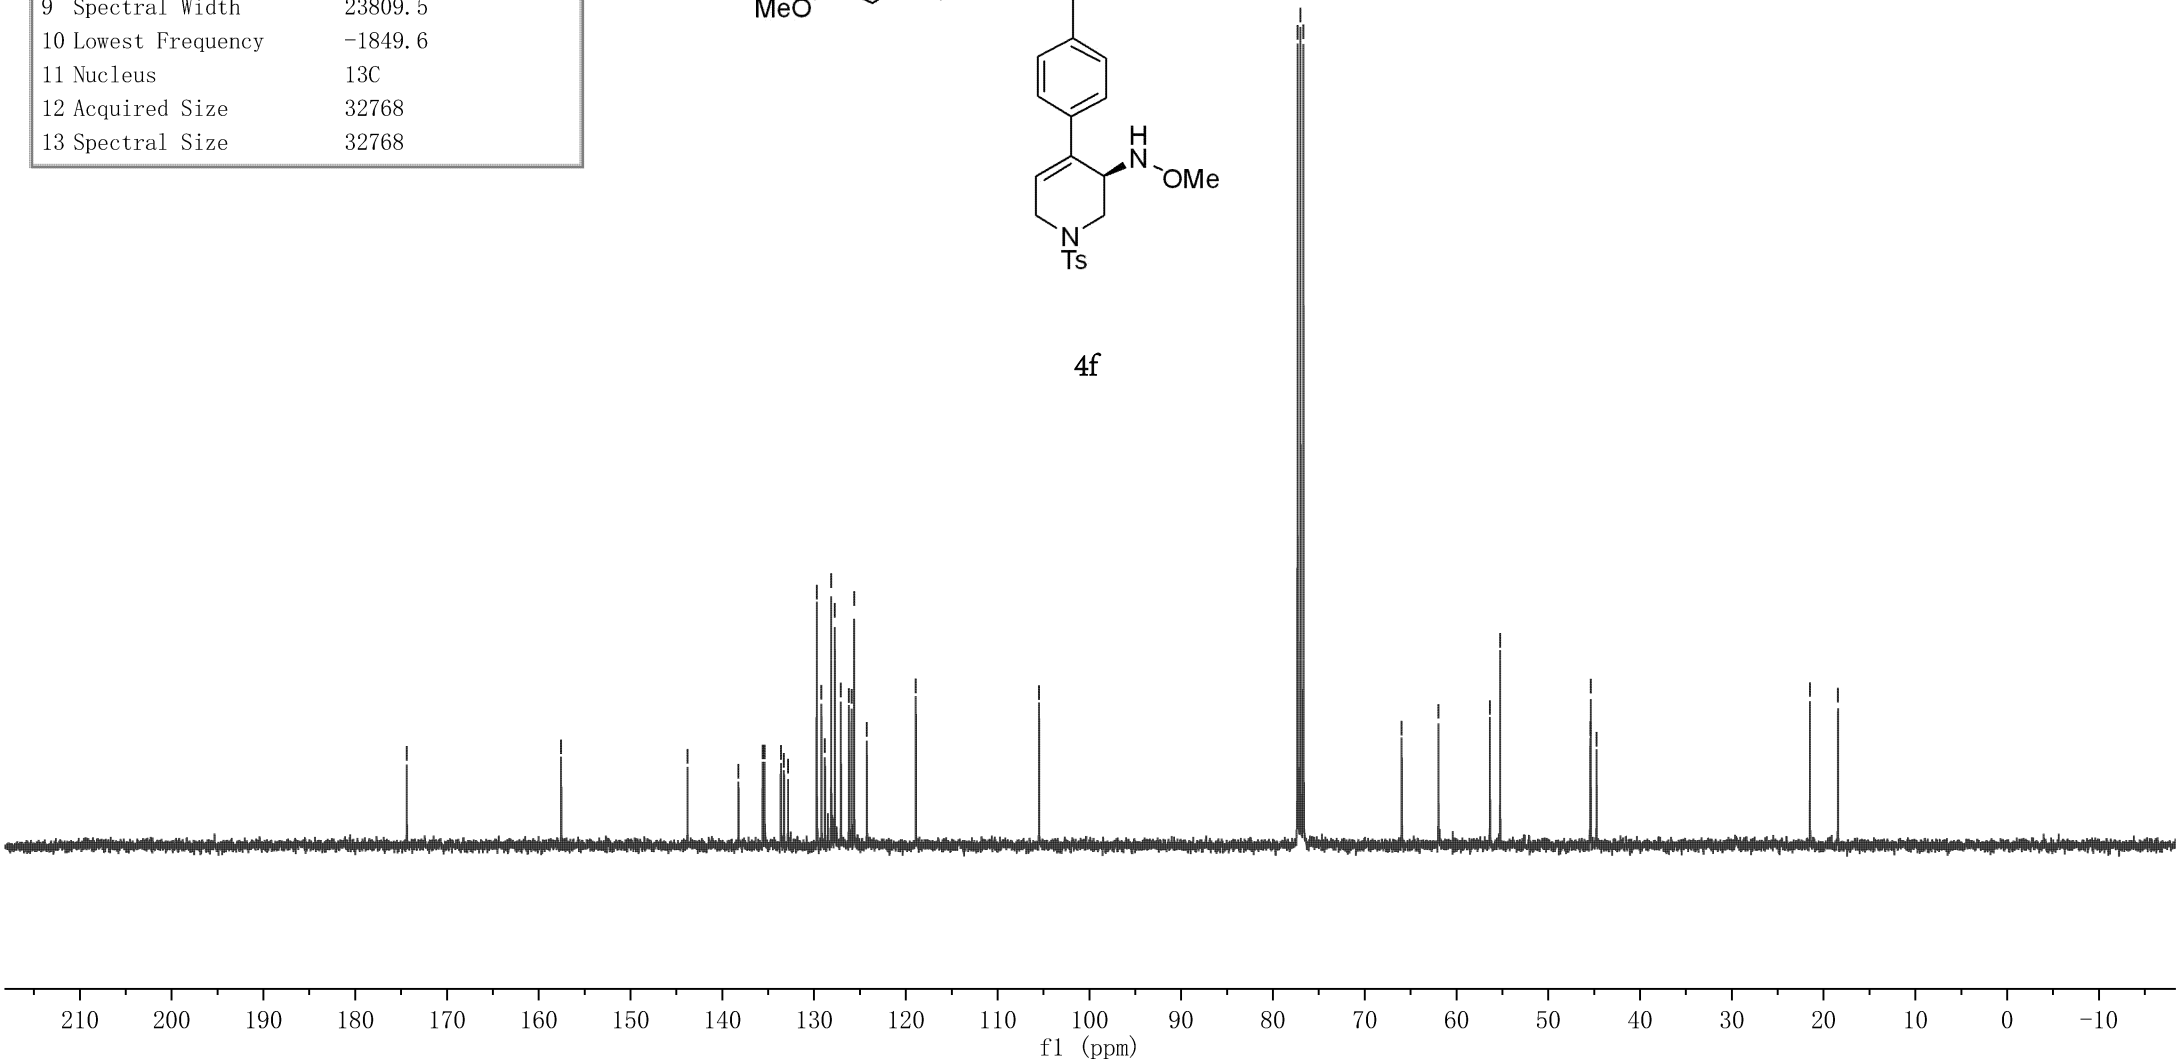

Supplement: d6cc00996d1.pdf [file d6cc00996d1.pdf]
